# Supplementary material for: A Biostimulant Obtained from the Seaweed Ascophyllum nodosum Protects Arabidopsis thaliana from Severe Oxidative Stress
Source: Int J Mol Sci. 2020 Jan 11;21(2):474. doi: 10.3390/ijms21020474 (PMC7013732; doi:10.3390/ijms21020474)
Supplement: Supplementary file 1 [file ijms-21-00474-s001.zip]

Archive with 11 entries (11 files):
- Data.S1.xlsx
- Data.S2.xlsx
- Data.S3.xlsx
- Data.S4.xlsx
- Data.S5.xlsx
- Data.S6.xlsx
- Data.S7.xlsx
- Supplementary Figures.pdf
- Supplementary Figures.pptx
- Table.S1.xlsx
- Table.S2.xlsx
