# Supplementary material for: A Biostimulant Obtained from the Seaweed Ascophyllum nodosum Protects Arabidopsis thaliana from Severe Oxidative Stress
Source: Int J Mol Sci. 2020 Jan 11;21(2):474. doi: 10.3390/ijms21020474 (PMC7013732; doi:10.3390/ijms21020474)
Supplement: Supplementary file 1 [file ijms-21-00474-s001.zip › Data.S1.xlsx]

## Sheet: Ordinary one-way ANOVA
Number of families	1
Number of comparisons per family	6
Alpha	0.05
Tukey's multiple comparisons test	Mean Diff.	95% CI of diff.	Significant?	Summary	Adjusted P Value
H2O+H2O vs. H2O+PQ	-28.81	-36.73 to -20.89	Yes	****	< 0.0001
H2O+H2O vs. SF+H2O	0.4518	-7.467 to 8.370	No	ns	0.9977
H2O+H2O vs. SF+PQ	0.1677	-7.751 to 8.086	No	ns	0.9999
H2O+PQ vs. SF+H2O	29.26	21.34 to 37.18	Yes	****	< 0.0001
H2O+PQ vs. SF+PQ	28.98	21.06 to 36.89	Yes	****	< 0.0001
SF+H2O vs. SF+PQ	-0.2841	-8.203 to 7.634	No	ns	0.9994
Test details	Mean 1	Mean 2	Mean Diff.	SE of diff.	n1	n2	q	DF
H2O+H2O vs. H2O+PQ	8.221	37.03	-28.81	2.473	3	3	16.48	8
H2O+H2O vs. SF+H2O	8.221	7.769	0.4518	2.473	3	3	0.2584	8
H2O+H2O vs. SF+PQ	8.221	8.053	0.1677	2.473	3	3	0.09591	8
H2O+PQ vs. SF+H2O	37.03	7.769	29.26	2.473	3	3	16.73	8
H2O+PQ vs. SF+PQ	37.03	8.053	28.98	2.473	3	3	16.57	8
SF+H2O vs. SF+PQ	7.769	8.053	-0.2841	2.473	3	3	0.1625	8

## Sheet: Raw data
	Electrolyte leakage-Biological replicate 1
		Leaf from replicates R1-R10 (before boiling)										Leaf from replicates R1-R10 (After boiling)											% conductivity
							Corrected values (reading -blank)											Corrected values (Reading- blank)											Avearage of % conditivity from 3 biological replicates
	Replicate	H2O+H2O	H2O+PQ	SF+H2O	SF+PQ	Water Blank	H2O+H2O	H2O+PQ	SF+H2O	SF+PQ		Replicate	H2O+H2O	H2O+PQ	SF+H2O	SF+PQ	Water blank	H2O+H2O	H2O+PQ	SF+H2O	SF+PQ			H2O+H2O	H2O+PQ	SF+H2O	SF+PQ		H2O+H2O	H2O+PQ	SF+H2O	SF+PQ
	1	4.8	26.7	6.9	5.4	0.7	4.1	26	6.2	4.7		1	48.7	71.3	64.5	75	0.7	48	70.6	63.8	74.3		R1	8.54167	36.8272	9.71787	6.32571		7.80058	42.729	8.07047	8.18967	Biological replicate 1
	2	5	53.1	7.2	5.9	0.7	4.3	52.4	6.5	5.2		2	63	84.9	92.2	82	0.7	62.3	84.2	91.5	81.3		R2	6.90209	62.2328	7.10383	6.39606		8.02655	30.7703	7.42687	7.45147	Biological replicate 2
	3	6	18.7	9.1	6.3	0.7	5.3	18	8.4	5.6		3	66.2	61.7	105.1	90.3	0.7	65.5	61	104.4	89.6		R3	8.0916	29.5082	8.04598	6.25		8.83501	37.5883	7.80944	8.51792	Biological replicate 3
	4	5.3	41.4	5.4	5.5	0.7	4.6	40.7	4.7	4.8		4	57.8	64	79.8	63	0.7	57.1	63.3	79.1	62.3		R4	8.05604	64.297	5.94185	7.70465		8.22071	37.0292	7.76893	8.05302	Average
	5	5.1	15.9	5.9	6.6	0.7	4.4	15.2	5.2	5.9		5	65.8	46.6	83.1	84.6	0.7	65.1	45.9	82.4	83.9		R5	6.75883	33.1155	6.31068	7.03218
	6	5.1	11.4	7.1	8.9	0.7	4.4	10.7	6.4	8.2		6	74.7	66	86	86.7	0.7	74	65.3	85.3	86		R6	5.94595	16.3859	7.50293	9.53488
	7	7.4	17.9	5.4	7	0.7	6.7	17.2	4.7	6.3		7	110.7	52.7	35.8	72.6	0.7	110	52	35.1	71.9		R7	6.09091	33.0769	13.3903	8.76217
	8	6.8	64.5	6	6.1	0.7	6.1	63.8	5.3	5.4		8	82.8	81.5	73.2	60.1	0.7	82.1	80.8	72.5	59.4		R8	7.42996	78.9604	7.31034	9.09091
	9	11.5	14.9	8.6	10.5	0.7	10.8	14.2	7.9	9.8		9	97.2	38.7	98.1	93.7	0.7	96.5	38	97.4	93		R9	11.1917	37.3684	8.11088	10.5376
	10	6.8	21.3	5.6	5	0.7	6.1	20.6	4.9	4.3		10	68.5	58.7	68.1	42.6	0.7	67.8	58	67.4	41.9		R10	8.99705	35.5172	7.27003	10.2625
																							Mean	7.80058	42.729	8.07047	8.18967
	Electrolyte leakage-Biological replicate 2
		Leaf from replicates R1-R10 (before boiling)										Leaf from replicates R1-R10 (After boiling)											% conductivity
							Corrected values (reading -blank)											Corrected values (reading-blank)
	Replicate	H2O+H2O	H2O+PQ	SF+H2O	SF+PQ	Water blank	H2O+H2O	H2O+PQ	SF+H2O	SF+PQ		Replicate	H2O+H2O	H2O+PQ	SF+H2O	SF+PQ	Water blank	H2O+H2O	H2O+PQ	SF+H2O	SF+PQ			H2O+H2O	H2O+PQ	SF+H2O	SF+PQ
	1	7.7	12.4	5.7	4.8	0.7	7	11.7	5	4.1		1	61.6	51.1	78.1	63.8	0.7	60.9	50.4	77.4	63.1		R1	11.4943	23.2143	6.45995	6.49762
	2	6.1	13.8	5.5	6.6	0.7	5.4	13.1	4.8	5.9		2	90.5	49.5	74	82.2	0.7	89.8	48.8	73.3	81.5		R2	6.01336	26.8443	6.54843	7.23926
	3	7.2	14.2	6.8	6.7	0.7	6.5	13.5	6.1	6		3	58.6	57.3	104.4	79.6	0.7	57.9	56.6	103.7	78.9		R3	11.2263	23.8516	5.88235	7.60456
	4	7	17.6	6.5	7.1	0.7	6.3	16.9	5.8	6.4		4	77.6	69.4	70.2	93	0.7	76.9	68.7	69.5	92.3		R4	8.19246	24.5997	8.34532	6.93391
	5	4.8	19.7	6	8.5	0.7	4.1	19	5.3	7.8		5	53.7	52.6	67	84.5	0.7	53	51.9	66.3	83.8		R5	7.73585	36.6089	7.99397	9.30788
	6	6.8	40	5.8	7.6	0.7	6.1	39.3	5.1	6.9		6	76.2	93.3	52	84.6	0.7	75.5	92.6	51.3	83.9		R6	8.07947	42.4406	9.94152	8.22408
	7	7.8	24.3	5.1	6.1	0.7	7.1	23.6	4.4	5.4		7	99.2	73.5	58.6	104.4	0.7	98.5	72.8	57.9	103.7		R7	7.20812	32.4176	7.59931	5.20733
	8	5.7	20.3	6.7	6.6	0.7	5	19.6	6	5.9		8	75.4	62.8	101.5	77.8	0.7	74.7	62.1	100.8	77.1		R8	6.69344	31.562	5.95238	7.6524
	9	6	26.9	4.8	7	0.7	5.3	26.2	4.1	6.3		9	91.7	63	68.1	70	0.7	91	62.3	67.4	69.3		R9	5.82418	42.0546	6.08309	9.09091
	10	7.5	24.4	9.5	7.7	0.7	6.8	23.7	8.8	7		10	87.9	99	93.7	104.3	0.7	87.2	98.3	93	103.6		R10	7.79817	24.1099	9.46237	6.75676
																							Mean	8.02655	30.7703	7.42687	7.45147
	Electrolyte leakage-Biological replicate 3
		Leaf from replicates R1-R10 (before boiling)										Leaf from replicates R1-R10 (After boiling)											% conductivity
							Corrected values (reading -blank)											Corrected values (reading-blank)
	Replicate	H2O+H2O	H2O+PQ	SF+H2O	SF+PQ	Water blank	H2O+H2O	H2O+PQ	SF+H2O	SF+PQ		Replicate	H2O+H2O	H2O+PQ	SF+H2O	SF+PQ	Water blank	H2O+H2O	H2O+PQ	SF+H2O	SF+PQ			H2O+H2O	H2O+PQ	SF+H2O	SF+PQ
	1	10.6	24.1	5.9	12.5	0.7	9.9	23.4	5.2	11.8		1	100.6	81.5	65.1	82.4	0.7	99.9	80.8	64.4	81.7		R1	9.90991	28.9604	8.07453	14.4431
	2	6.4	27.9	8.1	7.7	0.7	5.7	27.2	7.4	7		2	61.2	70.1	99.3	63.2	0.7	60.5	69.4	98.6	62.5		R2	9.42149	39.1931	7.50507	11.2
	3	8	36.3	6.2	5.5	0.7	7.3	35.6	5.5	4.8		3	123.3	45.3	76.7	67.2	0.7	122.6	44.6	76	66.5		R3	5.95432	79.8206	7.23684	7.21805
	4	10.5	27.7	8	4.3	0.7	9.8	27	7.3	3.6		4	92.2	106.7	77.6	68	0.7	91.5	106	76.9	67.3		R4	10.7104	25.4717	9.49285	5.34918
	5	9.1	24	6.6	5.8	0.7	8.4	23.3	5.9	5.1		5	70.8	47.5	86.6	89.2	0.7	70.1	46.8	85.9	88.5		R5	11.9829	49.7863	6.86845	5.76271
	6	5.5	28.4	4.8	7.6	0.7	4.8	27.7	4.1	6.9		6	64.8	69	51.8	79.6	0.7	64.1	68.3	51.1	78.9		R6	7.4883	40.5564	8.02348	8.74525
	7	6.7	15.2	5	6.9	0.7	6	14.5	4.3	6.2		7	94.6	77.6	52.8	87.1	0.7	93.9	76.9	52.1	86.4		R7	6.38978	18.8557	8.25336	7.17593
	8	10.4	19.6	7	7	0.7	9.7	18.9	6.3	6.3		8	77	52.3	79.6	90.7	0.7	76.3	51.6	78.9	90		R8	12.713	36.6279	7.98479	7
	9	6.6	16.6	5.2	7.8	0.7	5.9	15.9	4.5	7.1		9	88.7	62.4	77.1	62.9	0.7	88	61.7	76.4	62.2		R9	6.70455	25.7699	5.89005	11.4148
	10	5.2	17.2	9.5	5.2	0.7	4.5	16.5	8.8	4.5		10	64.3	54.2	101.1	66.2	0.7	63.6	53.5	100.4	65.5		R10	7.07547	30.8411	8.76494	6.87023
																							Mean	8.83501	37.5883	7.80944	8.51792
