# Supplementary material for: A Biostimulant Obtained from the Seaweed Ascophyllum nodosum Protects Arabidopsis thaliana from Severe Oxidative Stress
Source: Int J Mol Sci. 2020 Jan 11;21(2):474. doi: 10.3390/ijms21020474 (PMC7013732; doi:10.3390/ijms21020474)
Supplement: Supplementary file 1 [file ijms-21-00474-s001.zip › Data.S2.xlsx]

## Sheet: Sheet1
		log2 fold change					average TMM values				annotation
TAIR ID	cluster	SF+PQ vs. SF+H2O	SF+PQ vs. H2O+PQ	SF+PQ vs. H2O+H2O	SF+H2O vs. H2O+H2O	H2O+PQ vs. H2O+H2O	H2O+H2O	H2O+PQ	SF+H2O	SF+PQ	genename	description
AT1G03820	1	.	1.16523	.	.	-1.43893	21.7203	7.94033	20.3113	17.501		E6-like protein
AT1G04240	1	.	.	.	.	-1.19681	52.1043	22.3633	52.3097	38.1973	SHY2	AUX/IAA transcriptional regulator family protein
AT1G10657	1	.	1.0223	.	.	-1.36695	25.3447	9.64433	18.475	19.3607		transmembrane protein
AT1G12845	1	.	1.21676	.	.	-1.27036	63.4903	26.1637	64.5857	59.6303		transmembrane protein
AT1G14280	1	.	1.06215	.	.	-1.22742	22.9003	9.66533	26.0133	19.9553	PKS2	phytochrome kinase substrate 2
AT1G15550	1	.	.	.	.	-1.66005	8.09133	2.489	5.964	6.31767	GA3OX1	gibberellin 3-oxidase 1
AT1G15825	1	.	.	.	.	-1.84743	8.33567	2.239	7.96	5.581		hydroxyproline-rich glycoprotein family protein
AT1G15830	1	.	1.17146	.	.	-1.51376	10.258	3.61567	8.16133	7.81167		hypothetical protein
AT1G18400	1	.	.	.	.	-1.01094	20.8303	10.1123	26.4297	19.4963	BEE1	BR enhanced expression 1
AT1G18870	1	.	1.11507	.	.	-1.20325	7.08067	2.975	6.28067	6.52667	ICS2	isochorismate synthase 2
AT1G29440	1	.	.	.	.	-1.3732	16.641	6.305	16.65	12.0047	SAUR63	SAUR-like auxin-responsive protein family
AT1G29500	1	.	.	.	.	-1.60672	13.5103	4.30833	11.2193	9.085		SAUR-like auxin-responsive protein family
AT1G50280	1	.	.	.	.	-1.37847	5.16233	1.93533	5.09733	4.17633		Phototropic-responsive NPH3 family protein
AT1G52190	1	.	.	.	.	-1.03106	80.6913	39.2253	90.114	72.6937		Major facilitator superfamily protein
AT1G55330	1	.	1.28248	.	.	-1.3922	525.812	198.303	509.707	475.949	AGP21	arabinogalactan protein 21
AT1G56720	1	.	.	.	.	-1.05652	14.1983	6.66867	12.806	12.299		Protein kinase superfamily protein
AT1G61795	1	.	.	.	.	-1.25865	7.40333	2.94133	8.05933	7.02133		PAK-box/P21-Rho-binding family protein
AT1G65310	1	.	.	.	.	-1.4727	2.896	0.957667	2.912	2.12833	XTH17	xyloglucan endotransglucosylase/hydrolase 17
AT1G66100	1	.	1.01931	.	.	-1.32847	331.018	130.582	329.688	260.511		Plant thionin
AT1G68870	1	.	.	.	.	-1.35944	9.83633	3.87867	8.81533	7.47667	SOFL2	SOB five-like 2
AT1G70430	1	.	.	.	.	-1.02917	3.83133	1.88867	3.37867	2.91833		Protein kinase superfamily protein
AT1G78530	1	.	.	.	.	-1.88292	2.12033	0.513333	1.44	1.43833		Protein kinase superfamily protein
AT1G78970	1	.	.	.	.	-1.07277	11.3947	5.40533	11.4277	8.372	LUP1	lupeol synthase 1
AT2G16990	1	.	1.31585	.	.	-1.36405	10.3057	3.83933	10.9357	9.61367		Major facilitator superfamily protein
AT2G17300	1	.	.	.	.	-1.2998	9.49233	3.77767	8.93067	7.43933		hypothetical protein
AT2G18890	1	.	1.02624	.	.	-1.12903	17.4153	8.11967	18.5763	15.392		Protein kinase superfamily protein
AT2G22810	1	.	1.90415	.	.	-2.2165	1.75333	0.326667	2.36567	1.37167	ACS4	1-aminocyclopropane-1-carboxylate synthase 4
AT2G29290	1	.	.	.	.	-1.20908	44.7823	18.692	32.1093	30.8637		NAD(P)-binding Rossmann-fold superfamily protein
AT2G30420	1	.	.	.	.	-1.34682	9.991	3.8	9.868	9.23567	ETC2	Homeodomain-like superfamily protein
AT2G30790	1	.	.	.	.	-1.00779	9.77933	4.876	7.76667	7.42767	PSBP-2	photosystem II subunit P-2
AT2G32100	1	.	.	.	.	-1.00261	15.4867	7.61	15.9097	10.635	OFP16	ovate family protein 16
AT2G32560	1	.	.	.	.	-1.19695	28.7303	12.302	27.9283	23.6113		F-box family protein
AT2G34170	1	.	.	.	.	-1.18968	12.401	5.39433	11.2903	9.73333		hypothetical protein (DUF688)
AT2G34620	1	.	1.06493	.	.	-1.3295	53.7903	21.061	44.162	43.7133		Mitochondrial transcription termination factor family protein
AT2G38480	1	.	.	.	.	-1.24891	7.22067	2.95767	7.27767	5.69167		Uncharacterized protein family (UPF0497)
AT2G40130	1	.	.	.	.	-1.05318	11.7987	5.64533	11.7283	10.8453		Double Clp-N motif-containing P-loop nucleoside triphosphate hydrolases superfamily protein
AT2G42380	1	.	1.04036	.	.	-1.32357	15.006	6.01567	18.9943	12.1603	BZIP34	Basic-leucine zipper (bZIP) transcription factor family protein
AT2G42530	1	.	1.08147	.	.	-1.18087	537.012	235.587	528.469	488.868	COR15B	cold regulated 15b
AT2G44340	1	.	.	.	.	-1.40645	7.242	2.652	7.469	5.107		VQ motif-containing protein
AT2G44740	1	.	.	.	.	-1.5112	19.1627	6.577	15.556	11.2487	CYCP4;1	cyclin p4;1
AT2G47930	1	.	.	.	.	-1.0005	33.0543	16.3293	35.9603	31.814	AGP26	arabinogalactan protein 26
AT3G03820	1	.	.	.	.	-1.67728	25.966	8.08733	20.445	15.8157	SAUR29	SAUR-like auxin-responsive protein family
AT3G03840	1	.	.	.	.	-1.42015	7.81367	2.83633	8.668	6.611	SAUR27	SAUR-like auxin-responsive protein family
AT3G03850	1	.	.	.	.	-1.48986	9.531	3.18167	11.571	6.41367	SAUR26	SAUR-like auxin-responsive protein family
AT3G06770	1	.	.	.	.	-1.06905	18.6013	8.92233	23.9973	17.3573		Pectin lyase-like superfamily protein
AT3G08940	1	.	1.08746	.	.	-1.05352	3027.19	1449.14	3533.29	3026.97	LHCB4.2	light harvesting complex photosystem II
AT3G16360	1	.	.	.	.	-1.73896	5.10367	2.08767	3.77967	4.40133	AHP4	HPT phosphotransmitter 4
AT3G19850	1	.	1.18759	.	.	-1.21123	19.085	8.128	18.5623	18.3397		Phototropic-responsive NPH3 family protein
AT3G23080	1	.	.	.	.	-1.12624	76.2377	34.6143	67.693	65.8163		Polyketide cyclase/dehydrase and lipid transport superfamily protein
AT3G26490	1	.	.	.	.	-1.19042	5.78167	2.44233	5.60733	4.53733		Phototropic-responsive NPH3 family protein
AT3G29631	1	.	1.30842	.	.	-1.34845	35.523	13.398	31.63	33.6323		nuclease
AT3G49260	1	.	1.13576	.	.	-1.12228	35.3437	16.0873	37.556	35.244	iqd21	IQ-domain 21
AT3G50120	1	.	.	.	.	-1.48088	3.50933	1.19233	3.35133	2.46167		transmembrane protein, putative (DUF247)
AT3G53010	1	.	.	.	.	-1.52132	2.781	0.924333	2.187	1.77567		carbohydrate esterase, putative (DUF303)
AT3G53530	1	.	1.00093	.	.	-1.00437	15.9717	7.73733	17.5387	15.3657	NAKR3	Chloroplast-targeted copper chaperone protein
AT3G58120	1	.	.	.	.	-1.00209	26.2887	12.9247	36.7457	19.0713	BZIP61	Basic-leucine zipper (bZIP) transcription factor family protein
AT3G60290	1	.	1.08293	.	.	-1.48702	9.82833	3.42767	8.243	7.235		2-oxoglutarate (2OG) and Fe(II)-dependent oxygenase superfamily protein
AT3G62070	1	.	.	-1.09315	.	-1.6431	7.57	2.33	5.26333	3.52667		hypothetical protein
AT3G63450	1	.	1.0427	.	.	-1.11727	5.76667	2.535	5.96433	5.27533		RNA-binding (RRM/RBD/RNP motifs) family protein
AT4G01460	1	.	.	.	.	-1.03951	14.922	6.92233	13.2983	11.1203		basic helix-loop-helix (bHLH) DNA-binding superfamily protein
AT4G02630	1	.	1.06851	.	.	-1.06056	19.5463	9.23033	21.3557	19.1887		Protein kinase superfamily protein
AT4G04955	1	.	.	.	.	-1.00319	8.97633	4.45533	8.48067	7.60567	ALN	allantoinase
AT4G09890	1	.	1.03561	.	.	-1.14547	62.727	27.8617	56.7897	56.7927		mediator of RNA polymerase II transcription subunit, putative (DUF3511)
AT4G12520	1	.	.	.	.	-2.88424	1.92333	0.18	2.382	0.654667		Bifunctional inhibitor/lipid-transfer protein/seed storage 2S albumin superfamily protein
AT4G14550	1	.	.	.	.	-1.13307	19.2187	8.45167	15.8783	14.2857	IAA14	indole-3-acetic acid inducible 14
AT4G14560	1	.	.	.	.	-1.34461	24.2327	9.392	20.7733	17.3137	IAA1	indole-3-acetic acid inducible
AT4G16515	1	.	.	.	.	-1.90944	21.0323	5.69767	19.4597	13.524	RGF6	root meristem growth factor
AT4G23400	1	.	.	.	.	-1.11514	174.383	79.865	183.863	152.65	PIP1;5	plasma membrane intrinsic protein 1;5
AT4G32280	1	.	1.46936	-1.02648	.	-2.41859	13.4927	2.28667	10.1143	6.51167	IAA29	indole-3-acetic acid inducible 29
AT4G33490	1	.	1.10462	.	.	-1.04341	35.838	16.7023	34.66	35.5783		Eukaryotic aspartyl protease family protein
AT4G34220	1	.	.	.	.	-1.00206	26.869	13.295	26.94	24.978		Leucine-rich repeat protein kinase family protein
AT4G34760	1	.	1.02815	.	.	-1.41349	46.2897	17.222	42.63	34.6527		SAUR-like auxin-responsive protein family
AT4G34900	1	.	1.00753	.	.	-1.2381	12.9697	5.38433	12.7833	10.751	XDH2	xanthine dehydrogenase 2
AT4G36540	1	.	.	.	.	-1.20395	67.1507	28.8337	46.4963	43.6577	BEE2	BR enhanced expression 2
AT4G38690	1	.	.	.	.	-1.03309	22.321	10.8023	18.65	14.5513		PLC-like phosphodiesterases superfamily protein
AT5G05890	1	.	.	.	.	-1.19838	6.80867	2.906	5.62667	4.68533		UDP-Glycosyltransferase superfamily protein
AT5G06930	1	.	.	.	.	-1.23399	2.81367	1.144	2.60667	2.136		nucleolar-like protein
AT5G10150	1	.	.	.	.	-1.18337	12.9097	5.805	11.1867	10.193		UPSTREAM OF FLC protein (DUF966)
AT5G10250	1	.	1.48365	.	.	-1.6737	1.92867	0.579667	1.882	1.65467	DOT3	Phototropic-responsive NPH3 family protein
AT5G12050	1	.	.	.	.	-1.30659	9.08333	3.65033	7.045	6.68133		rho GTPase-activating protein
AT5G18010	1	.	.	.	.	-2.15299	4.94933	0.941	5.487	1.97967	SAUR19	SAUR-like auxin-responsive protein family
AT5G20110	1	.	1.05152	.	.	-1.03993	11.5507	5.57033	13.6213	11.5163		Dynein light chain type 1 family protein
AT5G20630	1	.	.	.	.	-1.23506	642.652	271.215	471.451	466.407	GER3	germin 3
AT5G24580	1	.	.	.	.	-1.14823	17.479	7.74133	18.133	10.9037		Heavy metal transport/detoxification superfamily protein
AT5G27360	1	.	1.00562	.	.	-1.06214	10.22	4.79467	8.28733	9.56967	SFP2	Major facilitator superfamily protein
AT5G44680	1	.	.	.	.	-1.12588	52.1163	23.7187	51.563	39.6647		DNA glycosylase superfamily protein
AT5G48490	1	.	.	.	.	-1.31487	75.2443	29.8217	64.2497	53.08		Bifunctional inhibitor/lipid-transfer protein/seed storage 2S albumin superfamily protein
AT5G49730	1	.	.	.	.	-1.07513	92.7747	43.6793	98.1523	80.4583	FRO6	ferric reduction oxidase 6
AT5G50580	1	.	1.86131	.	.	-2.75018	11.0357	1.611	6.835	6.12933	SAE1B	SUMO-activating enzyme 1B
AT5G54190	1	.	1.13199	.	.	-1.31119	33.145	13.3583	35.175	28.6247	PORA	protochlorophyllide oxidoreductase A
AT5G54585	1	.	.	.	.	-1.64593	35.4887	11.146	22.807	22.3693		hypothetical protein
AT5G59360	1	.	.	.	.	-2.10402	2.71867	0.542333	2.10233	1.603		hypothetical protein
AT5G62280	1	.	.	.	.	-1.60103	9.41333	2.994	10.0617	6.24133		DUF1442 family protein (DUF1442)
AT5G63140	1	.	1.04587	.	.	-1.06957	6.48767	2.98433	6.011	6.20533	PAP29	purple acid phosphatase 29
AT5G66580	1	.	.	.	.	-1.39031	9.437	3.515	6.61667	5.312		hypothetical protein
ATCG00120	1	.	.	.	.	-1.03294	13.061	6.25267	12.9933	9.47933	ATPA	ATP synthase subunit alpha
ATCG00130	1	.	.	.	.	-1.04294	29.341	13.715	26.5053	17.8063	ATPF	ATPase, F0 complex, subunit B/B', bacterial/chloroplast
ATCG00480	1	.	.	.	.	-1.06927	5190.04	2456.13	5325.34	4329.66	PB	ATP synthase subunit beta
AT1G01560	2	.	-2.46597	.	.	2.33272	7.096	35.5887	5.43667	6.27433	MPK11	MAP kinase 11
AT1G02220	2	.	-3.0938	.	.	3.34701	2.14533	21.7583	1.923	2.497	NAC003	NAC domain containing protein 3
AT1G03220	2	.	-2.66016	.	.	2.0472	48.2847	197.604	27.6377	30.7927		Eukaryotic aspartyl protease family protein
AT1G05675	2	.	-3.24955	.	.	3.16442	2.493	22.2633	2.043	2.224		UDP-Glycosyltransferase superfamily protein
AT1G06160	2	.	-2.52849	.	.	2.59889	9.61067	58.0627	9.20367	9.76767	ORA59	octadecanoid-responsive AP2/ERF 59
AT1G08630	2	.	-4.0346	.	.	3.56142	0.71	8.59467	0.628667	0.494	THA1	threonine aldolase 1
AT1G10070	2	.	-3.00409	.	.	2.25127	6.46767	30.624	3.854	3.83467	BCAT-2	branched-chain amino acid transaminase 2
AT1G11925	2	.	-4.72639	.	.	3.05017	1.121	9.42367	0.464	0.304667		Stigma-specific Stig1 family protein
AT1G13340	2	.	-3.01469	.	.	2.95947	2.92667	22.772	2.577	2.76733		Regulator of Vps4 activity in the MVB pathway protein
AT1G15380	2	.	-4.30095	.	.	2.74848	1.195	8.387	0.707	0.413333	GLYI4	Lactoylglutathione lyase / glyoxalase I family protein
AT1G19020	2	.	-2.85636	.	.	2.77059	36.5683	247.436	26.236	33.4027		CDP-diacylglycerol-glycerol-3-phosphate 3-phosphatidyltransferase
AT1G19250	2	.	-5.04699	.	.	5.09363	0.223	7.702	0.0863333	0.205	FMO1	flavin-dependent monooxygenase 1
AT1G21120	2	.	-2.25384	.	.	2.72848	4.01833	26.4357	2.97967	5.46367	IGMT2	O-methyltransferase family protein
AT1G21310	2	.	-2.60841	.	.	2.60181	32.879	197.786	33.87	31.9007	EXT3	extensin 3
AT1G22400	2	.	-3.39566	.	.	2.87929	7.16867	52.3023	5.25233	4.87867	UGT85A1	UDP-Glycosyltransferase superfamily protein
AT1G23550	2	.	-3.30191	.	.	3.01289	1.35867	10.903	0.985	1.043	SRO2	similar to RCD one 2
AT1G28480	2	.	-2.8175	.	.	2.40935	9.622	50.6633	7.74733	6.987	GRX480	Thioredoxin superfamily protein
AT1G32940	2	.	-3.13805	.	.	3.08787	5.79933	48.989	4.90167	5.46333	SBT3.5	Subtilase family protein
AT1G32960	2	.	-3.77929	.	.	4.16015	0.576333	10.2697	0.534	0.734	SBT3.3	Subtilase family protein
AT1G33030	2	.	-3.78686	.	.	3.8828	0.834667	12.2717	0.598667	0.834		O-methyltransferase family protein
AT1G33960	2	.	-3.23649	.	.	2.64499	3.976	24.6403	2.835	2.42433	AIG1	P-loop containing nucleoside triphosphate hydrolases superfamily protein
AT1G35230	2	.	-2.60791	.	.	3.16323	4.433	39.3033	4.879	6.30667	AGP5	arabinogalactan protein 5
AT1G47510	2	.	-3.18163	.	.	3.0735	2.11	18.2753	1.46333	2.00767	5PTASE11	inositol polyphosphate 5-phosphatase 11
AT1G51890	2	.	-3.48406	.	.	3.29562	0.795333	7.58967	0.596333	0.688667		Leucine-rich repeat protein kinase family protein
AT1G52200	2	.	-2.55556	.	.	2.26067	11.224	53.2627	8.36267	8.84433		PLAC8 family protein
AT1G53625	2	.	-4.08288	.	.	3.03394	2.306	19.087	2.026	1.03567		hypothetical protein
AT1G54890	2	.	-5.24849	.	.	5.35348	0.114667	4.90367	0.201	0.109667		Late embryogenesis abundant (LEA) protein-like protein
AT1G58340	2	.	-3.6483	.	.	2.97464	1.734	13.498	1.50633	1.049	ZF14	MATE efflux family protein
AT1G62300	2	.	-3.013	.	.	2.61873	7.278	44.3513	5.21333	5.388	WRKY6	WRKY family transcription factor
AT1G67810	2	.	-2.70581	.	.	3.30472	3.63267	35.9933	4.80567	5.35133	SUFE2	sulfur E2
AT1G71000	2	.	-2.35874	2.0236	.	4.41846	1.194	25.1477	2.95367	4.99433		Chaperone DnaJ-domain superfamily protein
AT1G71520	2	.	-5.07299	.	.	6.45665	0.0823333	7.684	0.0173333	0.215333		Integrase-type DNA-binding superfamily protein
AT1G74360	2	.	-3.30633	.	.	2.74042	2.58133	17.08	1.92533	1.67833		Leucine-rich repeat protein kinase family protein
AT1G74590	2	.	-2.93387	.	.	3.32895	3.67667	36.822	4.48967	4.70267	GSTU10	glutathione S-transferase TAU 10
AT1G76680	2	.	-2.60897	.	.	2.75118	29.229	196.1	29.932	32.5733	OPR1	12-oxophytodienoate reductase 1
AT1G79680	2	.	-3.98819	.	.	2.87252	1.35367	9.85333	0.668	0.588	WAKL10	WALL ASSOCIATED KINASE (WAK)-LIKE 10
AT2G03760	2	.	-2.63415	.	.	2.28088	19.1457	92.3183	14.0743	14.584	SOT12	sulfotransferase 12
AT2G04070	2	.	-3.46918	.	.	5.42823	0.170667	7.606	0.517	0.725		MATE efflux family protein
AT2G13810	2	.	-4.36474	.	.	5.13841	0.219	8.186	0.340333	0.395	ALD1	AGD2-like defense response protein 1
AT2G14610	2	.	-2.81502	.	.	2.32761	26.4193	131.794	24.2677	18.3793	PR1	pathogenesis-related protein 1
AT2G14620	2	.	-3.20782	.	.	3.10252	1.1	9.391	0.721667	0.985	XTH10	xyloglucan endotransglucosylase/hydrolase 10
AT2G15220	2	.	-2.88899	.	.	2.64516	2.51333	15.7003	2.203	2.10233		Plant basic secretory protein (BSP) family protein
AT2G18660	2	.	-2.64221	.	.	2.77273	4.26833	28.8813	4.58633	4.52233	PNP-A	plant natriuretic peptide A
AT2G18680	2	.	-3.34789	.	.	3.29145	2.45067	23.965	2.14333	2.24633		transmembrane protein
AT2G18690	2	.	-3.03159	.	.	2.81482	18.667	135.591	15.8347	16.403		transmembrane protein
AT2G20560	2	.	-2.76934	.	.	3.24968	1.939	18.3537	2.292	2.613		DNAJ heat shock family protein
AT2G23270	2	.	-3.3848	.	.	3.21222	0.789667	7.287	0.284	0.639		transmembrane protein
AT2G26560	2	.	-3.07217	.	.	3.00942	45.588	364.615	38.4847	42.5423	PLA2A	phospholipase A 2A
AT2G27389	2	.	-5.91825	.	.	4.10134	0.527333	9.46567	0.186333	0.134333		hypothetical protein
AT2G28210	2	.	-2.9625	.	.	3.00861	6.072	47.5393	5.97267	5.958	ACA2	alpha carbonic anhydrase 2
AT2G30140	2	.	-2.47576	.	.	2.49834	10.0553	57.0233	9.70867	10.4367	UGT87A2	UDP-Glycosyltransferase superfamily protein
AT2G31945	2	.	-4.45726	.	.	2.54775	1.62833	9.79067	0.555333	0.375667		transmembrane protein
AT2G33710	2	.	-5.66368	.	.	4.28279	0.397333	7.60667	0.348667	0.211333		Integrase-type DNA-binding superfamily protein
AT2G36780	2	.	-4.0969	.	.	3.77267	0.779	10.881	0.311667	0.605333		UDP-Glycosyltransferase superfamily protein
AT2G37770	2	.	-3.1313	.	.	2.77177	4.083	27.6817	2.775	3.066	ChlAKR	NAD(P)-linked oxidoreductase superfamily protein
AT2G39518	2	.	-3.67969	.	.	3.11631	1.05367	9.29067	0.877333	0.658667		Uncharacterized protein family (UPF0497)
AT2G41380	2	.	-3.50924	.	.	3.42722	2.11167	22.705	1.69267	1.91533		S-adenosyl-L-methionine-dependent methyltransferases superfamily protein
AT2G43000	2	.	-4.0159	.	.	4.12409	0.690667	12.924	0.683667	0.729	NAC042	NAC domain containing protein 42
AT2G43590	2	.	-3.27689	.	.	2.86281	20.2653	146.408	19.5153	14.8563		Chitinase family protein
AT2G44790	2	.	-2.77498	.	.	2.72393	3.48133	22.7967	3.893	3.30033	UCC2	uclacyanin 2
AT3G01290	2	.	-2.48559	.	.	2.43232	41.521	222.452	33.7673	38.972	HIR2	SPFH/Band 7/PHB domain-containing membrane-associated protein family
AT3G01420	2	.	-4.69617	.	.	3.48579	1.13333	12.6923	1.089	0.47	DOX1	Peroxidase superfamily protein
AT3G02800	2	.	-3.33463	.	.	2.60146	2.12867	12.875	1.19467	1.18133	PFA-DSP3	Tyrosine phosphatase family protein
AT3G04720	2	.	-3.12541	.	.	2.73932	229.683	1522.8	243.749	171.371	PR4	pathogenesis-related 4
AT3G09405	2	.	-3.22441	.	.	3.28992	1.93633	18.9653	2.15	2.01467		Pectinacetylesterase family protein
AT3G14990	2	.	-2.90829	.	.	2.44249	45.693	250.205	33.7167	32.736	DJ1A	Class I glutamine amidotransferase-like superfamily protein
AT3G15518	2	.	-3.25382	.	.	3.30194	3.19633	31.594	3.84133	3.09033		hypothetical protein
AT3G18250	2	.	-2.77701	.	.	2.06618	16.1747	68.2727	12.612	9.531		Putative membrane lipoprotein
AT3G21520	2	.	-4.71453	.	.	4.92962	0.212	6.40633	0.245333	0.195	DMP1	transmembrane protein, putative (DUF679 domain membrane protein 1)
AT3G26500	2	.	-3.07413	.	.	2.60911	2.621	15.9973	1.979	1.84	PIRL2	plant intracellular ras group-related LRR 2
AT3G29034	2	.	-2.70971	.	.	2.97563	3.895	30.8393	4.90533	4.56633		transmembrane protein
AT3G43250	2	.	-3.8484	.	.	2.58195	1.71467	10.127	0.453667	0.641333		coiled-coil protein (DUF572)
AT3G48640	2	.	-3.00568	.	.	2.71702	1.77233	11.0777	1.22733	1.29833		transmembrane protein
AT3G49540	2	.	-5.1458	.	.	6.08198	0.056	4.555	0.0486667	0.0993333		hypothetical protein
AT3G53160	2	.	-3.91775	.	.	3.86693	0.743333	10.8367	0.760667	0.676	UGT73C7	UDP-glucosyl transferase 73C7
AT3G61930	2	.	-5.00726	.	.	4.19689	0.34	6.412	0.176667	0.156		hypothetical protein
AT4G03320	2	.	-3.55053	.	.	3.48409	1.42933	16.127	1.07467	1.36167	Tic20-IV	translocon at the inner envelope membrane of chloroplasts 20-IV
AT4G05020	2	.	-2.72124	.	.	2.86526	5.89733	42.7993	5.962	6.31733	NDB2	NAD(P)H dehydrogenase B2
AT4G08780	2	.	-4.00379	.	.	4.36193	0.269333	5.50567	0.118667	0.328333		Peroxidase superfamily protein
AT4G15120	2	.	-3.16947	.	.	3.18496	0.893333	8.29633	0.445	0.869		VQ motif-containing protein
AT4G15760	2	.	-3.0092	.	.	2.22329	19.2147	89.2033	11.854	10.8503	MO1	monooxygenase 1
AT4G17500	2	.	-2.43181	.	.	2.07663	32.3797	135.397	19.9917	24.5887	ERF-1	ethylene responsive element binding factor 1
AT4G19370	2	.	-4.14808	.	.	3.79731	0.703667	9.788	0.924667	0.492		chitin synthase, putative (DUF1218)
AT4G21390	2	.	-3.09078	.	.	3.01983	2.12967	17.0957	1.52967	1.927	B120	S-locus lectin protein kinase family protein
AT4G23700	2	.	-4.28602	.	.	3.69743	0.531	6.92833	0.305	0.366667	CHX17	cation/H+ exchanger 17
AT4G25200	2	.	-4.98683	.	.	7.53125	0.026	7.09167	0.052	0.205	HSP23.6-MITO	mitochondrion-localized small heat shock protein 23.6
AT4G34135	2	.	-3.44872	.	.	3.30439	4.704	46.1783	4.64267	4.14167	UGT73B2	UDP-glucosyltransferase 73B2
AT4G37710	2	.	-6.42216	.	.	5.02862	0.184	5.072	0.203333	0.0353333		VQ motif-containing protein
AT5G01380	2	.	-4.77407	.	.	3.31516	0.67	6.69833	0.263667	0.205333		Homeodomain-like superfamily protein
AT5G02490	2	.	-2.65625	.	.	3.14054	7.72133	67.5807	8.76767	10.5297	Hsp70-2	Heat shock protein 70 (Hsp 70) family protein
AT5G05300	2	.	-2.99641	.	.	2.58544	3.65033	22.001	4.136	2.59367		hypothetical protein
AT5G08240	2	.	-2.71819	.	.	2.42142	4.46333	23.9173	3.59967	3.51167		transmembrane protein
AT5G08790	2	.	-2.47722	.	.	2.61032	33.5423	203.065	28.1573	35.832	ATAF2	NAC (No Apical Meristem) domain transcriptional regulator superfamily protein
AT5G13210	2	.	-3.04703	.	.	2.56842	3.017	17.698	2.118	2.07333		Uncharacterized conserved protein UCP015417, vWA
AT5G13330	2	.	-3.81144	.	.	3.09949	1.83	15.5807	0.977667	1.065	Rap2.6L	related to AP2 6l
AT5G13490	2	.	-2.34673	.	.	2.6809	6.333	40.813	5.973	7.86067	AAC2	ADP/ATP carrier 2
AT5G14730	2	.	-3.11472	.	.	2.72553	1.63267	10.707	0.748667	1.23767		hypothetical protein
AT5G16960	2	.	-4.29648	.	.	3.69432	0.590667	7.637	0.304	0.353667		Zinc-binding dehydrogenase family protein
AT5G16980	2	.	-3.15559	.	.	3.29444	1.39833	15.0077	1.485	1.65133		Zinc-binding dehydrogenase family protein
AT5G17390	2	.	-4.83684	.	.	5.40433	0.110667	5.51433	0.0173333	0.197333		Adenine nucleotide alpha hydrolases-like superfamily protein
AT5G18470	2	.	-2.48393	.	.	2.8383	13.1407	93.394	15.6443	16.317		Curculin-like (mannose-binding) lectin family protein
AT5G20960	2	.	-2.85477	.	.	2.84726	3.277	23.266	3.24033	3.16233	AO1	aldehyde oxidase 1
AT5G25250	2	.	-2.57951	.	.	2.86764	16.1117	116.914	15.7797	19.153	FLOT1	SPFH/Band 7/PHB domain-containing membrane-associated protein family
AT5G27420	2	.	-2.75837	.	.	2.43716	18.7157	100.566	10.571	14.552	CNI1	carbon/nitrogen insensitive 1
AT5G39050	2	.	-2.72008	.	.	2.65539	9.76033	61.029	9.40033	9.10033	PMAT1	HXXXD-type acyl-transferase family protein
AT5G42830	2	.	-2.99568	.	.	2.75465	2.67033	18.013	1.42333	2.20933		HXXXD-type acyl-transferase family protein
AT5G44990	2	.	-6.58918	.	.	4.7986	0.189	5.05367	0.139	0.039		Glutathione S-transferase family protein
AT5G46295	2	.	-3.39315	.	.	2.82877	2.25167	16.1613	1.20867	1.28233		transmembrane protein
AT5G51060	2	.	-5.08836	.	.	4.95888	0.167	5.20333	0.073	0.138	RHD2	NADPH/respiratory burst oxidase protein D
AT5G51465	2	.	-4.02492	.	.	3.66775	1.01933	12.7903	0.977333	0.762333		hypothetical protein
AT5G58840	2	.	-3.72429	.	.	3.73708	0.609	8.35167	0.444	0.6		Subtilase family protein
AT5G64120	2	.	-2.61541	.	.	2.09404	16.4203	69.4307	13.1127	11.1337		Peroxidase superfamily protein
AT5G67310	2	.	-4.4489	.	.	3.66172	0.408333	5.24267	0.173	0.219667	CYP81G1	cytochrome P450, family 81, subfamily G, polypeptide 1
AT1G02230	3	.	-1.35365	.	.	2.09376	1.22467	5.205	0.847667	2.01733	NAC004	NAC domain containing protein 4
AT1G02360	3	.	.	.	.	1.45909	2.86233	7.851	2.357	4.58133		Chitinase family protein
AT1G07620	3	.	-1.99476	.	.	2.73823	0.830667	5.54967	1.14	1.41567	ATOBGM	GTP-binding protein Obg/CgtA
AT1G13470	3	.	-1.1901	1.07439	.	2.30212	9.03467	44.5247	13.2643	19.168		hypothetical protein (DUF1262)
AT1G14880	3	.	.	1.23789	.	2.13694	37.151	162.757	49.4017	87.896	PCR1	PLANT CADMIUM RESISTANCE 1
AT1G18390	3	.	-1.65273	.	.	1.91353	4.41333	15.709	5.26267	5.175		Serine/Threonine kinase family catalytic domain protein
AT1G21250	3	.	.	.	.	1.74793	47.0043	156.685	55.2837	77.5113	WAK1	cell wall-associated kinase
AT1G22180	3	.	-1.31239	.	.	1.45695	10.0883	27.628	10.8873	11.3057		Sec14p-like phosphatidylinositol transfer family protein
AT1G24147	3	.	.	1.14642	.	1.79655	30.39	105.007	42.3317	67.0977		transmembrane protein
AT1G35710	3	.	-1.0391	.	.	1.60188	24.5373	73.9337	26.555	35.3433		kinase family with leucine-rich repeat domain-containing protein
AT1G51800	3	.	-2.04421	.	.	2.70014	1.05067	6.81	1.32	1.59967	IOS1	Leucine-rich repeat protein kinase family protein
AT1G55920	3	.	-1.00156	.	.	1.98898	15.3493	60.4393	26.6813	29.679	SERAT2%3B1	serine acetyltransferase 2;1
AT1G59865	3	.	.	.	.	2.43862	0.500667	3.32667	0.584333	1.63567		transmembrane protein
AT1G64710	3	.	-1.18457	.	.	1.64006	45.4347	139.511	58.8473	58.413		GroES-like zinc-binding alcohol dehydrogenase family protein
AT1G66880	3	.	-1.328	.	.	1.5117	12.2167	34.54	12.0443	14.4873		Protein kinase superfamily protein
AT1G72070	3	.	-2.20387	.	.	1.96461	3.33267	11.88	3.023	4.18367		Chaperone DnaJ-domain superfamily protein
AT1G72280	3	.	-1.25538	.	.	1.66018	3.15867	9.94667	3.47633	4.036	ERO1	endoplasmic reticulum oxidoreductins 1
AT1G75270	3	.	-1.0756	.	.	1.4576	18.4047	50.2607	22.2487	23.3577	DHAR2	dehydroascorbate reductase 2
AT1G76520	3	.	-1.31277	.	.	1.51187	18.525	52.631	20.7163	20.799		Auxin efflux carrier family protein
AT1G79410	3	.	-1.1414	.	.	1.76894	3.84733	13.0227	6.295	5.804	OCT5	organic cation/carnitine transporter5
AT2G03505	3	.	-1.83111	.	.	2.53086	1.034	5.93767	1.498	1.72333		Carbohydrate-binding X8 domain superfamily protein
AT2G04400	3	.	-1.49544	.	.	1.90008	35.997	133.369	42.1397	46.4713		Aldolase-type TIM barrel family protein
AT2G04450	3	.	-1.20129	.	.	1.4358	6.051	16.3937	5.89167	6.98667	NUDT6	nudix hydrolase homolog 6
AT2G14560	3	.	.	1.21562	.	1.722	110.947	364.78	137.22	245.197	LURP1	LURP-one-like protein (DUF567)
AT2G16500	3	.	-1.28804	.	.	1.51366	41.624	118.046	49.3687	47.4653	ADC1	arginine decarboxylase 1
AT2G20562	3	.	.	.	.	2.34181	1.67533	8.674	2.87767	2.206		taximin
AT2G23680	3	.	-1.37178	.	.	1.9838	9.43267	37.222	10.7657	14.034		Cold acclimation protein WCOR413 family
AT2G26440	3	.	.	.	.	1.37657	16.313	42.0903	17.5583	24.4347		Plant invertase/pectin methylesterase inhibitor superfamily
AT2G29170	3	.	.	.	.	1.80396	16.241	56.5937	30.75	32.1663		NAD(P)-binding Rossmann-fold superfamily protein
AT2G31020	3	.	-1.10017	.	.	1.81451	1.32467	4.67	1.28767	2.131	ORP1A	OSBP(oxysterol binding protein)-related protein 1A
AT2G32130	3	.	-2.45632	.	.	3.47242	0.218333	2.614	0.211	0.403333		intracellular protein transporter, putative (DUF641)
AT2G32680	3	.	-1.37871	.	.	2.06469	5.534	23.0943	7.39467	8.72767	RLP23	receptor like protein 23
AT3G07090	3	.	-1.1722	.	.	1.54964	26.4107	76.788	32.7193	33.458		PPPDE putative thiol peptidase family protein
AT3G09440	3	.	-1.47619	.	.	2.31587	105.574	517.409	144.838	182.255		Heat shock protein 70 (Hsp 70) family protein
AT3G11010	3	.	.	.	.	1.61124	8.73867	26.5033	11.116	15.646	RLP34	receptor like protein 34
AT3G11840	3	.	-1.32782	.	.	2.02834	4.206	17.1443	4.37833	6.66533	PUB24	E3 ubiquitin-protein ligase PUB24-like protein
AT3G17609	3	.	.	.	.	2.22409	2.491	11.576	3.222	4.431	HYH	HY5-homolog
AT3G19660	3	.	-1.05781	.	.	1.45662	8.074	22.0403	7.564	10.364		hypothetical protein
AT3G21690	3	.	.	.	.	1.4097	20.4793	54.0197	23.5183	27.409		MATE efflux family protein
AT3G22530	3	4.26264	.	8.88095	.	9.62666	0	5.485	0.199333	3.13133		heat shock protein
AT3G24500	3	.	-1.54725	.	.	2.06045	7.846	34.278	9.63333	11.2513	MBF1C	multiprotein bridging factor 1C
AT3G25882	3	.	.	.	.	1.45504	14.098	38.4607	14.1573	25.1683	NIMIN-2	NIM1-interacting 2
AT3G26440	3	.	.	.	.	1.06121	2.35367	9.434	2.949	3.19267		transmembrane protein, putative (DUF707)
AT3G29000	3	.	.	.	.	1.30725	9.32267	23.1467	6.51933	11.3633		Calcium-binding EF-hand family protein
AT3G47480	3	.	-1.44527	.	.	1.76738	8.88033	30.2837	9.40567	10.8993		Calcium-binding EF-hand family protein
AT3G49320	3	.	-1.25862	.	.	1.6725	3.519	11.2283	3.855	4.62933		Metal-dependent protein hydrolase
AT3G51330	3	.	-1.47506	.	.	1.95283	2.411	9.69267	2.84133	3.43633		Eukaryotic aspartyl protease family protein
AT3G51890	3	.	-1.18708	.	.	1.60875	12.1963	36.9867	13.5357	15.9063		Clathrin light chain protein
AT3G54420	3	.	-1.08061	.	.	1.52838	2.99667	8.59867	2.86967	3.99067	EP3	homolog of carrot EP3-3 chitinase
AT3G56710	3	.	-1.21111	.	.	1.92675	30.8667	115.854	29.6833	49.966	SIB1	sigma factor binding protein 1
AT3G57240	3	.	-1.07469	1.35048	.	2.45957	8.27533	45.254	15.1417	21.0703	BG3	beta-1,3-glucanase 3
AT3G58150	3	.	-2.13463	.	.	2.68389	0.656	4.34	0.882667	0.943333		Optic atrophy 3 protein (OPA3)
AT3G59700	3	.	.	.	.	2.06599	2.04433	8.53933	3.07633	2.923	HLECRK	lectin-receptor kinase
AT3G60415	3	.	-1.5304	.	.	2.10156	27.0563	115.222	30.3263	39.1277		phosphoglycerate mutase family protein
AT4G01700	3	.	-1.04581	.	.	1.53624	12.6117	36.3	14.535	17.1853		Chitinase family protein
AT4G03450	3	.	-1.58867	1.15207	.	2.77187	1.49167	10.0507	2.05267	3.23833		Ankyrin repeat family protein
AT4G04540	3	.	-2.28487	.	.	4.04996	0.141333	2.437	0.145	0.493667	CRK39	cysteine-rich RLK (RECEPTOR-like protein kinase) 39
AT4G10040	3	.	.	.	.	1.67088	23.133	73.1833	28.1137	36.1287	CYTC-2	cytochrome c-2
AT4G10500	3	.	.	.	.	1.87343	1.23567	4.53	1.232	1.81133		2-oxoglutarate (2OG) and Fe(II)-dependent oxygenase superfamily protein
AT4G11850	3	.	-1.26681	.	.	1.56246	13.829	40.6097	14.38	16.539	PLDGAMMA1	phospholipase D gamma 1
AT4G13510	3	.	-1.00847	.	.	1.35807	65.986	167.842	64.375	81.954	AMT1%3B1	ammonium transporter 1;1
AT4G15550	3	.	.	1.31245	1.22811	2.3338	4.87733	24.4263	11.462	12.0737	IAGLU	indole-3-acetate beta-D-glucosyltransferase
AT4G17070	3	.	-1.21225	.	.	1.52118	12.9293	36.9197	13.1553	15.594		peptidyl-prolyl cis-trans isomerase
AT4G18010	3	.	-1.32918	.	.	1.59033	10.5777	31.5883	11.996	12.3317	IP5PII	myo-inositol polyphosphate 5-phosphatase 2
AT4G18430	3	.	-2.66379	.	.	3.51446	0.261667	2.94633	0.280667	0.492	RABA1e	RAB GTPase homolog A1E
AT4G21990	3	.	-1.33088	.	.	1.6323	56.139	172.586	64.649	67.5113	APR3	APS reductase 3
AT4G23150	3	.	-1.59734	.	.	2.10667	1.45633	6.37333	1.86067	2.04033	CRK7	cysteine-rich RLK (RECEPTOR-like protein kinase) 7
AT4G23610	3	.	.	.	.	2.23004	1.76167	8.297	2.70433	3.49167		Late embryogenesis abundant (LEA) hydroxyproline-rich glycoprotein family
AT4G25110	3	.	-1.06409	.	.	1.87148	1.74967	6.46967	2.065	2.99433	MC2	metacaspase 2
AT4G25900	3	.	-1.04448	.	.	1.38801	37.0757	96.3047	41.9057	45.9007		Galactose mutarotase-like superfamily protein
AT4G37910	3	.	-1.03122	.	.	1.29357	57.391	139.8	57.413	66.9947	mtHsc70-1	mitochondrial heat shock protein 70-1
AT4G38560	3	.	-1.38659	.	.	2.22816	1.15767	5.426	1.67733	2.00233		phospholipase-like protein (PEARLI 4) family protein
AT5G01540	3	.	-1.47405	.	.	1.76975	3.918	13.2947	4.26067	4.65367	LECRKA4.1	lectin receptor kinase a4.1
AT5G03210	3	.	.	.	.	1.635	73.3733	225.842	86.6873	112.74	DIP2	E3 ubiquitin-protein ligase
AT5G03380	3	.	-1.38721	.	.	2.00764	18.404	74.133	24.9717	27.2107		Heavy metal transport/detoxification superfamily protein
AT5G03630	3	.	-1.3593	.	.	2.03367	73.5007	298.637	87.5483	114.357	ATMDAR2	Pyridine nucleotide-disulfide oxidoreductase family protein
AT5G04930	3	.	-1.08938	.	.	1.38149	17.5293	45.3473	19.0667	20.946	ALA1	aminophospholipid ATPase 1
AT5G11670	3	.	-1.19829	.	.	1.47344	224.056	617.949	256.09	264.41	NADP-ME2	NADP-malic enzyme 2
AT5G22380	3	.	.	.	.	2.04991	3.303	13.7823	5.99533	5.43733	NAC090	NAC domain containing protein 90
AT5G23160	3	.	-2.69911	.	.	4.35092	0.133	2.63433	0.131667	0.384667		transmembrane protein
AT5G24210	3	.	.	.	.	1.39333	29.936	78.836	31.616	40.195		alpha/beta-Hydrolases superfamily protein
AT5G26690	3	.	.	.	.	1.93496	1.76067	6.94867	2.62933	2.74133		Heavy metal transport/detoxification superfamily protein
AT5G35320	3	.	-1.17088	.	.	1.49998	7.986	22.561	9.214	9.818		DBH-like monooxygenase
AT5G37490	3	.	-3.40931	.	.	6.50647	0.026	2.576	0.0346667	0.264		ARM repeat superfamily protein
AT5G44568	3	.	.	.	.	1.45229	30.522	82.9033	28.898	42.497		transmembrane protein
AT5G46871	3	.	.	.	.	1.44697	2.901	7.932	1.96233	3.39167		Putative membrane lipoprotein
AT5G48570	3	.	-1.21895	.	.	1.59397	3.73467	11.22	3.91233	4.739		FKBP-type peptidyl-prolyl cis-trans isomerase family protein
AT5G52570	3	.	-1.55968	.	.	1.94312	3.05533	12.018	2.57133	4.017	BETA-OHASE 2	beta-carotene hydroxylase 2
AT5G52750	3	.	.	.	.	1.64549	20.653	64.667	26.0657	32.7693		Heavy metal transport/detoxification superfamily protein
AT5G52760	3	.	-1.5092	.	.	2.25061	11.3363	53.587	14.3923	18.422		Copper transport protein family
AT5G54710	3	.	-1.21653	.	.	1.55789	8.714	25.488	10.294	10.7473		Ankyrin repeat family protein
AT5G54840	3	.	-1.45279	.	.	1.90879	6.363	24.1423	6.26467	8.69633	SGP1	Ras-related small GTP-binding family protein
AT5G54860	3	.	-1.37231	.	.	2.00812	6.73467	26.8753	7.67333	10.2003		Major facilitator superfamily protein
AT5G56350	3	.	-1.20982	.	.	1.4435	35.16	94.8853	39.6077	40.3057		Pyruvate kinase family protein
AT5G60730	3	.	-1.42734	.	.	1.98239	1.52167	6.11833	1.17933	2.24567		Anion-transporting ATPase
AT5G61010	3	.	-1.16358	.	.	1.64759	7.26167	22.6353	9.602	10.057	EXO70E2	exocyst subunit exo70 family protein E2
AT5G67350	3	.	-1.19669	.	.	1.58342	4.777	14.2517	6.06467	6.06333		hypothetical protein
AT1G07135	4	.	-1.47136	.	.	.	96.1237	157.684	43.58	55.742		glycine-rich protein
AT1G07150	4	.	-1.43248	.	.	.	2.73567	4.507	1.84967	1.61467	MAPKKK13	mitogen-activated protein kinase kinase kinase 13
AT1G10586	4	.	-2.95686	.	.	.	0.923667	1.99167	0.321	0.198333		basic helix-loop-helix (bHLH) DNA-binding superfamily protein
AT1G13260	4	.	-1.29729	-1.03983	.	.	95.9933	116.696	62.9787	46.5877	RAV1	related to ABI3/VP1 1
AT1G14780	4	.	-1.2552	.	.	.	1.31567	1.91433	0.811	0.773667		MAC/Perforin domain-containing protein
AT1G17990	4	.	-1.56944	.	.	1.06248	17.4953	36.8357	15.522	11.87		FMN-linked oxidoreductases superfamily protein
AT1G21000	4	.	-1.61374	.	.	.	25.502	49.5543	17.38	15.5807		PLATZ transcription factor family protein
AT1G21550	4	.	-1.56443	.	.	1.07177	13.6303	28.5557	9.91467	9.348		Calcium-binding EF-hand family protein
AT1G22190	4	.	-1.29658	.	.	.	35.1157	46.376	19.8483	18.4833		Integrase-type DNA-binding superfamily protein
AT1G22470	4	.	-2.85891	.	.	.	1.49167	2.80433	0.743333	0.336		hypothetical protein
AT1G22900	4	.	-1.46898	.	.	.	3.385	6.92033	2.109	2.42167		Disease resistance-responsive (dirigent-like protein) family protein
AT1G23850	4	.	-1.96317	.	.	.	2.996	5.75167	1.74067	1.441		transmembrane protein
AT1G24440	4	.	-1.21566	.	.	.	13.744	19.7217	9.22767	8.34933		RING/U-box superfamily protein
AT1G26800	4	.	-1.31739	.	.	.	19.6223	25.1397	11.0777	9.922		RING/U-box superfamily protein
AT1G29195	4	.	-1.86418	.	.	.	2.45967	5.43167	1.16467	1.44433		phosphatidylinositol 4-phosphate 5-kinase MSS4-like protein
AT1G30320	4	.	-1.5399	.	.	.	8.69133	14.6083	4.62733	4.909		Remorin family protein
AT1G30720	4	.	-1.69536	.	.	.	1.472	2.90033	0.776333	0.869		FAD-binding Berberine family protein
AT1G32700	4	.	-1.23897	.	-1.06939	.	32.51	41.1857	15.429	17.113		PLATZ transcription factor family protein
AT1G33055	4	.	-1.79788	.	.	.	2.53367	4.24833	1.49167	1.15233		hypothetical protein
AT1G44350	4	.	-1.70075	.	.	.	28.1103	44.1683	16.576	13.3427	ILL6	IAA-amino acid hydrolase ILR1-like 6
AT1G52030	4	.	-1.42015	-1.0661	.	.	27.4087	35.79	17.495	13.1107	MBP2	myrosinase-binding protein 2
AT1G54000	4	.	-1.28015	.	.	.	3.503	6.21933	2.34667	2.54267	GLL22	GDSL-like Lipase/Acylhydrolase superfamily protein
AT1G61340	4	.	-1.26348	.	.	.	15.4723	30.553	9.908	12.4743	FBS1	F-box family protein
AT1G66050	4	.	-1.59951	.	.	.	3.27	5.756	2.53333	1.85433	VIM2	Zinc finger (C3HC4-type RING finger) family protein
AT1G66760	4	.	-1.13243	.	-1.02472	.	19.7797	26.298	9.717	11.7493		MATE efflux family protein
AT1G68690	4	.	-1.74793	.	.	.	2.553	5.20667	1.44333	1.46567	PERK9	Protein kinase superfamily protein
AT1G69270	4	.	-1.09416	.	.	.	8.61633	12.685	6.424	5.804	RPK1	receptor-like protein kinase 1
AT1G69870	4	.	-1.16603	.	.	.	61.348	97.7567	49.9177	42.852	NRT1.7	nitrate transporter 1.7
AT1G74010	4	.	-1.32443	.	.	.	3.75167	5.27267	2.08167	2.04433		Calcium-dependent phosphotriesterase superfamily protein
AT1G74330	4	.	-1.09383	.	.	.	9.34567	13.7513	6.98533	5.97333		Protein kinase superfamily protein
AT1G75020	4	.	-1.45764	.	.	.	9.73533	14.598	7.16533	5.37933	LPAT4	lysophosphatidyl acyltransferase 4
AT1G76590	4	.	-1.14043	.	.	.	51.119	62.7887	28.441	27.919		PLATZ transcription factor family protein
AT1G78830	4	.	-1.36466	.	.	.	157.426	247.843	107.365	94.534		Curculin-like (mannose-binding) lectin family protein
AT2G01340	4	.	-1.10663	.	.	.	10.4063	17.5237	7.64367	7.94267	At17.1	plastid movement impaired protein
AT2G20880	4	.	-1.26037	.	.	.	5.47433	7.72533	3.335	3.11267	ERF53	Integrase-type DNA-binding superfamily protein
AT2G22770	4	.	-1.37306	.	.	.	3.72567	4.48367	1.86233	1.69833	NAI1	basic helix-loop-helix (bHLH) DNA-binding superfamily protein
AT2G23170	4	.	-1.90793	-1.06295	.	.	3.62667	6.707	2.89367	1.767	GH3.3	Auxin-responsive GH3 family protein
AT2G26190	4	.	-1.19093	.	.	.	41.4743	73.2053	26.7243	31.306		calmodulin-binding family protein
AT2G26530	4	.	-1.24607	.	.	.	34.0297	51.763	19.5303	22.1237	AR781	AR781, pheromone receptor-like protein (DUF1645)
AT2G28110	4	.	-1.62021	.	.	.	1.87767	3.734	1.00933	1.20567	FRA8	Exostosin family protein
AT2G32800	4	.	-1.35033	-1.01957	.	.	19.2663	24.6273	10.7907	9.46	AP4.3A	protein kinase family protein
AT2G33380	4	.	-1.63018	.	.	.	73.6313	132.855	52.406	43.1753	RD20	Caleosin-related family protein
AT2G34070	4	.	-1.44592	.	.	.	12.0183	20.6807	9.13833	7.39767	TBL37	TRICHOME BIREFRINGENCE-LIKE 37
AT2G34810	4	.	-1.71225	-1.09713	.	.	42.372	65.65	24.499	19.7373		FAD-binding Berberine family protein
AT2G35930	4	.	-1.4661	.	-1.23303	.	16.4797	24.727	6.996	8.73933	PUB23	plant U-box 23
AT2G36080	4	.	-1.26417	-1.08673	.	.	12.7737	14.6663	7.53567	5.96367	ABS2	AP2/B3-like transcriptional factor family protein
AT2G36380	4	.	-1.61277	.	.	1.05253	9.898	20.3667	6.56233	6.54067	ABCG34	pleiotropic drug resistance 6
AT2G37150	4	.	-1.05085	.	.	.	5.569	8.64033	4.48	3.597		RING/U-box superfamily protein
AT2G39400	4	.	-1.71384	.	.	1.05128	26.4503	54.5593	18.942	16.2507		alpha/beta-Hydrolases superfamily protein
AT2G43620	4	.	-1.82931	.	.	.	8.11867	15.6827	5.98733	4.317		Chitinase family protein
AT2G44500	4	.	-1.06943	.	.	.	13.244	17.4797	10.6563	8.142		O-fucosyltransferase family protein
AT2G48010	4	.	-1.24691	.	.	.	4.73867	6.00867	2.766	2.45933	RKF3	receptor-like kinase in in flowers 3
AT3G05200	4	.	-1.67006	.	.	1.01361	17.5123	35.113	12.484	10.7837	ATL6	RING/U-box superfamily protein
AT3G06420	4	.	-1.31086	.	.	.	18.6817	35.5437	14.2787	14.1163	ATG8H	Ubiquitin-like superfamily protein
AT3G06500	4	.	-1.17585	.	.	.	68.2007	114.769	46.315	49.834	A/N-InvC	Plant neutral invertase family protein
AT3G10985	4	.	-1.52539	.	.	.	55.5153	93.6243	32.3773	31.878	SAG20	senescence associated gene 20
AT3G14050	4	.	-1.451	.	.	.	26.3377	48.2323	17.5493	17.302	RSH2	RELA/SPOT homolog 2
AT3G18560	4	.	-2.08869	-1.04284	.	.	5.516	11.7147	3.32733	2.70967		hypothetical protein
AT3G19030	4	.	.	.	-1.20582	.	237.33	261.768	102.639	139.277		transcription initiation factor TFIID subunit 1b-like protein
AT3G26220	4	.	-1.09059	.	.	.	6.07667	9.84633	4.414	4.532	CYP71B3	cytochrome P450, family 71, subfamily B, polypeptide 3
AT3G28007	4	.	-1.41314	.	.	.	10.82	19.3487	8.172	7.13167	SWEET4	Nodulin MtN3 family protein
AT3G28340	4	.	-1.79405	.	.	1.09227	6.75033	14.3677	3.62	4.00867	GATL10	galacturonosyltransferase-like 10
AT3G29035	4	.	-1.23825	-1.005	.	.	7.28633	8.73633	3.80567	3.63233	NAC3	NAC domain containing protein 3
AT3G44860	4	.	-1.35434	.	.	.	109.903	195.693	71.017	75.3677	FAMT	farnesoic acid carboxyl-O-methyltransferase
AT3G46600	4	.	-1.56954	-1.02546	.	.	48.4713	71.986	24.3283	23.9493		GRAS family transcription factor
AT3G46620	4	.	-1.20139	.	.	.	23.0443	40.9797	13.5563	17.4333	RDUF1	zinc finger (C3HC4-type RING finger) family protein
AT3G49570	4	.	-1.60415	.	.	.	17.8133	28.7377	12.249	9.21667	LSU3	response to low sulfur 3
AT3G50060	4	.	-1.42757	-1.22564	.	.	23.715	27.8417	14.4927	10.071	MYB77	myb domain protein 77
AT3G51860	4	.	-1.59033	.	.	.	19.0447	33.7943	14.986	11.0607	CAX3	cation exchanger 3
AT3G52480	4	.	-1.45805	.	.	.	3.89833	5.419	2.896	1.891		transmembrane protein
AT3G55430	4	.	-1.42174	.	.	.	64.502	113.405	46.3623	41.6067		O-Glycosyl hydrolases family 17 protein
AT3G55840	4	.	-1.7528	.	.	.	6.24367	10.9573	3.07867	3.14067		Hs1pro-1 protein
AT3G57260	4	.	-2.11837	.	.	.	87.5917	171.31	69.025	39.4033	BGL2	beta-1,3-glucanase 2
AT3G57450	4	.	-1.22898	.	.	.	23.0367	44.8707	15.942	18.7493		hypothetical protein
AT3G59080	4	.	-1.11222	.	.	.	14.2593	17.7263	7.325	8.25767		Eukaryotic aspartyl protease family protein
AT3G59900	4	.	-1.65687	.	.	.	3.34967	5.246	3.27933	1.56667	ARGOS	auxin-regulated gene involved in organ size
AT3G60966	4	.	-2.26959	.	.	1.48356	1.23367	3.56933	0.634333	0.702333		RING/U-box superfamily protein
AT3G61190	4	.	-1.09648	.	.	.	18.237	21.153	9.97467	9.54633	BAP1	BON association protein 1
AT3G63010	4	.	-1.41129	.	.	.	3.43133	5.92	2.43467	2.15633	GID1B	alpha/beta-Hydrolases superfamily protein
AT4G03420	4	.	-1.34448	.	.	.	30.5887	57.1337	25.3593	22.0843		hypothetical protein (DUF789)
AT4G05100	4	.	-1.76001	.	.	.	3.74667	5.11133	1.891	1.45	MYB74	myb domain protein 74
AT4G15670	4	.	.	.	-1.2299	.	15.925	16.8197	6.77433	9.963		Thioredoxin superfamily protein
AT4G16000	4	.	-1.24123	.	.	.	13.7283	17.346	9.35133	7.229		hypothetical protein
AT4G17230	4	.	-1.26257	.	.	.	58.1433	86.232	39.4177	35.1503	SCL13	SCARECROW-like 13
AT4G17490	4	.	-1.23077	.	.	.	19.232	30.4673	8.345	12.662	ERF6	ethylene responsive element binding factor 6
AT4G17900	4	.	-1.64033	.	.	.	32.2207	60.2917	20.499	18.761		PLATZ transcription factor family protein
AT4G21510	4	.	-1.61938	-1.16641	.	.	6.04167	8.48367	3.348	2.72367	FBS2	F-box family protein
AT4G22467	4	.	-1.81932	.	.	.	5.62333	9.052	2.559	2.49633		hypothetical protein
AT4G23810	4	.	-1.28596	.	.	.	25.9413	45.9853	18.0057	18.453	WRKY53	WRKY family transcription factor
AT4G27460	4	.	-2.03262	.	-1.55522	.	1.894	4.84233	0.660333	1.16067	CBSX5	Cystathionine beta-synthase (CBS) family protein
AT4G27970	4	.	-1.40339	.	.	1.03944	3.63933	7.45767	2.115	2.831	SLAH2	SLAC1 homologue 2
AT4G29690	4	.	-2.05128	.	.	.	1.11867	1.87833	0.675667	0.427667		Alkaline-phosphatase-like family protein
AT4G29950	4	.	-1.48209	.	.	.	22.1003	36.2113	15.6953	12.7807		Ypt/Rab-GAP domain of gyp1p superfamily protein
AT4G30270	4	.	-1.52007	.	.	.	78.7487	134.822	58.8783	46.1653	XTH24	xyloglucan endotransglucosylase/hydrolase 24
AT4G30850	4	.	-1.48133	.	.	.	5.92167	11.6667	4.79867	3.99733	HHP2	heptahelical transmembrane protein2
AT4G31240	4	.	-1.20625	.	.	.	4.21933	5.91867	2.868	2.41867		protein kinase C-like zinc finger protein
AT4G31800	4	.	-1.57362	.	.	.	42.7177	82.4117	27.4277	27.9653	WRKY18	WRKY DNA-binding protein 18
AT4G33420	4	.	-3.22692	.	.	1.42933	0.951333	2.55533	0.562667	0.237667		Peroxidase superfamily protein
AT4G34138	4	.	-1.59363	-1.05969	.	.	16.4303	24.1883	8.978	7.82833	UGT73B1	UDP-glucosyl transferase 73B1
AT4G34710	4	.	-1.37662	.	.	.	82.1403	159.835	62.3273	60.6533	ADC2	arginine decarboxylase 2
AT4G36040	4	.	-1.55377	-1.06472	.	.	222.244	316.957	123.934	106.186	J11	Chaperone DnaJ-domain superfamily protein
AT5G05190	4	.	-1.12268	.	.	.	6.70033	10.7667	5.07667	4.82033		hypothetical protein (DUF3133)
AT5G05440	4	.	-1.0865	.	.	.	5.73467	8.707	3.59233	4.034	PYL5	Polyketide cyclase/dehydrase and lipid transport superfamily protein
AT5G06320	4	.	-1.167	.	.	.	235.408	420.078	157.67	183.849	NHL3	NDR1/HIN1-like 3
AT5G07310	4	.	-3.43937	.	.	.	0.629333	1.27733	0.208333	0.105667		Integrase-type DNA-binding superfamily protein
AT5G07440	4	.	-1.71603	.	.	.	83.4057	154.105	56.9413	46.556	GDH2	glutamate dehydrogenase 2
AT5G09440	4	.	-1.34581	.	.	.	17.14	23.7473	9.239	9.14033	EXL4	EXORDIUM like 4
AT5G10300	4	.	-1.50881	.	.	.	10.219	16.849	5.67733	5.76567	MES5	methyl esterase 5
AT5G21960	4	.	-2.86599	-2.21745	.	.	1.63367	2.639	0.245667	0.335667		Integrase-type DNA-binding superfamily protein
AT5G22540	4	.	-2.89297	.	.	.	1.11833	3.26967	0.526667	0.406667		transmembrane protein, putative (DUF247)
AT5G24160	4	.	-1.04504	.	.	.	16.3397	22.6227	12.9747	10.5993	SQE6	squalene monooxygenase 6
AT5G27520	4	.	-1.46723	.	.	.	23.9553	37.5553	16.2953	13.3173	PNC2	peroxisomal adenine nucleotide carrier 2
AT5G28830	4	.	-1.09116	.	.	.	15.8107	23.604	13.4397	10.8607		calcium-binding EF hand family protein
AT5G41740	4	.	-1.31368	.	.	1.09523	7.38433	15.693	4.70367	6.17		Disease resistance protein (TIR-NBS-LRR class) family
AT5G45110	4	.	-1.17019	.	.	.	19.8683	30.8327	12.0223	13.3617	NPR3	NPR1-like protein 3
AT5G46710	4	.	-1.35859	.	-1.18292	.	37.1537	53.532	16.1	20.497		PLATZ transcription factor family protein
AT5G47070	4	.	-1.39283	.	.	1.0555	16.2127	33.4373	11.6247	12.4867		Protein kinase superfamily protein
AT5G47230	4	.	-1.06265	.	.	.	12.612	20.1533	6.41867	9.37133	ERF5	ethylene responsive element binding factor 5
AT5G49520	4	.	-1.63884	.	.	.	6.731	11.3373	3.37767	3.53267	WRKY48	WRKY DNA-binding protein 48
AT5G52250	4	.	-1.57365	.	.	.	2.01633	3.62433	1.23933	1.17567	RUP1	Transducin/WD40 repeat-like superfamily protein
AT5G54300	4	.	-1.42697	.	.	.	12.3863	25.3203	8.49267	9.217		cotton fiber-like protein (DUF761)
AT5G55970	4	.	-1.50121	-1.12388	-1.32103	.	8.41767	11.1687	3.435	3.94233		RING/U-box superfamily protein
AT5G57550	4	.	-1.96615	.	.	.	2.47833	4.116	0.979667	1.04133	XTH25	xyloglucan endotransglucosylase/hydrolase 25
AT5G58650	4	.	.	.	-1.02856	.	31.3157	31.5383	15.2177	19.8647	PSY1	plant peptide containing sulfated tyrosine 1
AT5G63970	4	.	-1.52556	.	.	.	7.033	11.768	4.421	3.93867	RGLG3	Copine (Calcium-dependent phospholipid-binding protein) family
AT5G64260	4	.	-1.20259	-1.06511	.	.	59.164	66.2047	30.526	28.2133	EXL2	EXORDIUM like 2
AT5G64660	4	.	-1.16663	.	.	.	10.703	12.726	6.75867	5.49	CMPG2	CYS, MET, PRO, and GLY protein 2
AT5G65110	4	.	-1.25095	.	.	.	34.0083	59.4347	24.987	24.6933	ACX2	acyl-CoA oxidase 2
AT5G65660	4	.	-1.32063	.	.	.	43.4673	57.6647	26.2507	22.599		hydroxyproline-rich glycoprotein family protein
AT5G66070	4	.	-1.23314	.	.	.	28.331	52.8567	19.7477	21.921		RING/U-box superfamily protein
AT5G67450	4	.	-1.40723	.	.	.	2.59533	3.18433	1.306	1.149	ZF1	zinc-finger protein 1
AT1G01010	5	.	.	.	.	1.28646	3.252	7.947	2.74133	4.27033	NAC001	NAC domain containing protein 1
AT1G02980	5	.	-7.25893	.	.	4.00757	0.027	0.432333	0.0136667	0	CUL2	cullin 2
AT1G03370	5	.	.	.	.	1.02167	13.1727	26.5567	13.419	14.833		C2 calcium/lipid-binding and GRAM domain containing protein
AT1G03760	5	.	.	.	.	1.07778	6.92533	14.677	6.24633	7.922		Prefoldin chaperone subunit family protein
AT1G06180	5	.	.	.	.	1.31472	4.91433	12.214	4.74033	6.86867	MYB13	myb domain protein 13
AT1G07890	5	.	.	.	.	1.44196	372.311	1025.47	476.629	676.005	APX1	ascorbate peroxidase 1
AT1G08450	5	.	.	.	.	1.05413	61.2633	126.085	70.1517	81.616	CRT3	calreticulin 3
AT1G10990	5	.	.	.	.	1.46657	3.29633	9.237	4.49333	4.35767		transmembrane protein
AT1G12211	5	.	-3.61423	.	.	2.5239	0.107333	0.639667	0.166333	0.0423333		hypothetical protein
AT1G14300	5	.	.	.	.	1.0083	10.556	21.1633	10.462	11.735		ARM repeat superfamily protein
AT1G15790	5	.	.	.	.	1.42051	4.68933	12.1667	5.90333	6.258		mediator of RNA polymerase II transcription subunit 15a-like protein
AT1G18900	5	.	.	.	.	1.17054	5.24933	11.7507	6.213	6.513		Pentatricopeptide repeat (PPR) superfamily protein
AT1G21520	5	.	.	.	.	1.37812	23.9267	62.073	29.062	32.179		hypothetical protein
AT1G23100	5	.	.	.	.	1.04911	19.8767	40.8177	21.8473	29.226		GroES-like family protein
AT1G23830	5	.	.	.	.	1.3952	3.14867	8.37333	3.66267	4.17233		transmembrane protein
AT1G23840	5	.	.	.	.	1.11612	3.549	7.60433	3.414	4.60533		transmembrane protein
AT1G25370	5	.	-1.03521	.	.	1.30896	4.97033	12.266	5.49067	5.88		hypothetical protein (DUF1639)
AT1G26250	5	.	.	.	.	1.44615	2.05867	5.59767	2.99367	2.89567		Proline-rich extensin-like family protein
AT1G27020	5	.	.	.	.	1.01444	18.1033	36.4693	18.1507	22.3577		plant/protein
AT1G29300	5	.	.	.	.	1.20824	2.08933	4.77267	2.37933	2.33567	UNE1	intracellular protein transporter, putative (DUF641)
AT1G30070	5	.	.	.	.	1.156	13.869	32.0233	15.2293	16.866		SGS domain-containing protein
AT1G30900	5	.	.	.	.	1.43886	2.629	7.146	3.09967	4.659	VSR6	VACUOLAR SORTING RECEPTOR 6
AT1G30960	5	.	.	.	.	1.06836	3.586	7.49533	4.07467	4.99467		GTP-binding family protein
AT1G33600	5	.	.	.	.	1.09891	33.8347	71.164	51.246	57.502		Leucine-rich repeat (LRR) family protein
AT1G34420	5	.	-1.02762	.	.	1.37395	1.37367	3.52467	1.53033	1.70067		leucine-rich repeat transmembrane protein kinase family protein
AT1G34750	5	.	.	.	.	1.03983	10.0907	20.7333	12.0323	14.2533		Protein phosphatase 2C family protein
AT1G48320	5	.	.	.	.	1.17381	16.304	36.536	18.2957	20.9973	DHNAT1	Thioesterase superfamily protein
AT1G49900	5	.	-2.82245	.	.	2.62397	0.105	0.676333	0.045	0.0846667		C2H2 type zinc finger transcription factor family
AT1G51380	5	.	.	.	.	1.28429	1.498	3.505	1.583	2.02433		DEA(D/H)-box RNA helicase family protein
AT1G51660	5	.	.	.	.	1.24598	7.63033	17.9933	10.6963	13.8423	MKK4	mitogen-activated protein kinase kinase 4
AT1G51790	5	.	.	.	.	1.73952	1.2	3.99433	1.15033	2.37033		Leucine-rich repeat protein kinase family protein
AT1G51860	5	.	-2.37411	.	.	.	0.131	0.444	0.069	0.0813333		Leucine-rich repeat protein kinase family protein
AT1G55450	5	.	.	.	.	1.18561	85.982	196.707	85.334	102.489		S-adenosyl-L-methionine-dependent methyltransferases superfamily protein
AT1G56120	5	.	.	.	.	1.17186	2.52867	5.59133	3.38967	4.252		Leucine-rich repeat transmembrane protein kinase
AT1G58225	5	.	.	.	.	1.22985	7.16667	17.6433	8.69267	9.66467		hypothetical protein
AT1G61580	5	.	.	.	.	1.00727	13.9397	27.827	17.5903	22.258	RPL3B	R-protein L3 B
AT1G64950	5	.	.	.	.	1.50855	24.9773	70.4337	38.8197	38.9867	CYP89A5	cytochrome P450, family 89, subfamily A, polypeptide 5
AT1G65486	5	.	.	.	.	1.3211	15.984	39.5837	21.9097	26.2063		transmembrane protein
AT1G65790	5	.	.	.	.	1.12397	8.253	17.8887	9.59133	13.0063	RK1	receptor kinase 1
AT1G66590	5	.	.	.	.	1.30658	21.244	52.4103	22.7183	27.6813	COX19-1	cytochrome c oxidase 19-1
AT1G66960	5	.	-2.07318	.	.	2.32332	0.173667	0.868333	0.308667	0.208333	LUP5	Terpenoid cyclases family protein
AT1G67800	5	.	.	.	.	1.24677	10.0463	23.9127	10.7717	12.3177		Copine (Calcium-dependent phospholipid-binding protein) family
AT1G69520	5	.	.	.	.	1.54249	3.178	9.22267	4.01067	4.33667		S-adenosyl-L-methionine-dependent methyltransferases superfamily protein
AT1G70170	5	.	.	.	.	3.24875	0.0923333	0.933667	0.0733333	0.264	MMP	matrix metalloproteinase
AT1G71530	5	.	-1.1135	.	.	1.25006	2.37933	5.1	2.18633	3.00633		Protein kinase superfamily protein
AT1G72910	5	.	.	.	.	1.04331	20.1693	41.3103	18.977	28.0227		Toll-Interleukin-Resistance (TIR) domain-containing protein
AT1G72930	5	.	.	.	.	1.11449	95.5993	209.872	136.393	182.924	TIR	toll/interleukin-1 receptor-like protein
AT1G74710	5	.	.	.	.	1.22802	9.07367	21.161	10.0037	10.5087	EDS16	ADC synthase superfamily protein
AT1G74750	5	.	.	.	.	1.38305	2.33	6.074	2.69733	3.15833		Pentatricopeptide repeat (PPR) superfamily protein
AT1G77810	5	.	.	.	.	1.15178	6.341	14.012	6.70633	7.944		Galactosyltransferase family protein
AT1G79450	5	.	.	.	.	1.54801	2.827	8.22267	2.944	4.36767	ALIS5	ALA-interacting subunit 5
AT1G79710	5	.	-1.03247	.	.	1.08416	3.18	6.67133	3.642	3.33667		Major facilitator superfamily protein
AT2G15042	5	.	.	.	.	1.0514	8.27433	17.0537	10.3507	13.4093		Leucine-rich repeat (LRR) family protein
AT2G15760	5	.	.	.	.	1.39292	1.422	3.74067	1.22833	2.11733		calmodulin-binding protein (DUF1645)
AT2G17120	5	.	.	.	.	1.16743	23.5453	52.516	25.1317	27.7913	LYM2	lysm domain GPI-anchored protein 2 precursor
AT2G17220	5	.	.	.	.	1.03461	14.6803	29.7957	14.9317	17.3463	Kin3	Protein kinase superfamily protein
AT2G17720	5	.	.	.	.	1.19128	22.7467	51.6343	25.298	27.0263	P4H5	2-oxoglutarate (2OG) and Fe(II)-dependent oxygenase superfamily protein
AT2G24500	5	.	.	.	.	1.12884	25.08	54.5133	28.731	33.3223	FZF	Zinc finger protein 622
AT2G24980	5	.	.	.	.	2.3594	0.196333	0.977333	0.313	0.282	EXT6	Proline-rich extensin-like family protein
AT2G25140	5	.	.	.	.	1.46161	4.563	12.5257	6.038	6.48167	CLPB4	casein lytic proteinase B4
AT2G29120	5	.	.	.	.	1.08844	5.52733	11.678	6.58267	6.37933	GLR2.7	glutamate receptor 2.7
AT2G29410	5	.	.	.	.	1.35534	0.931667	2.36267	0.916667	0.996667	MTPB1	metal tolerance protein B1
AT2G30870	5	.	.	.	.	1.01023	366.001	732.258	369.691	415.522	GSTF10	glutathione S-transferase PHI 10
AT2G32120	5	.	.	.	.	1.16549	1.32833	2.95433	1.29767	1.559	HSP70T-2	heat-shock protein 70T-2
AT2G33110	5	.	.	.	.	1.02321	3.60267	7.365	3.989	4.14933	VAMP723	vesicle-associated membrane protein 723
AT2G34260	5	.	.	.	.	1.10717	8.068	16.1017	8.19167	12.1963	WDR55	transducin family protein / WD-40 repeat family protein
AT2G35580	5	.	.	.	.	3.7791	0.109667	1.489	0.052	0.803		Serine protease inhibitor (SERPIN) family protein
AT2G36970	5	.	.	.	.	1.46122	2.04533	5.65	3.56067	3.82033		UDP-Glycosyltransferase superfamily protein
AT2G37710	5	.	.	.	.	1.0872	37.4513	79.0547	56.6373	68.0683	RLK	receptor lectin kinase
AT2G40180	5	.	.	.	.	2.4471	0.43	2.39867	0.548333	0.776	PP2C5	phosphatase 2C5
AT2G40740	5	.	.	.	.	2.99801	0.174667	1.55933	0.55	0.654333	WRKY55	WRKY DNA-binding protein 55
AT2G41180	5	.	.	.	.	1.42558	27.689	74.1407	39.4747	50.085	SIB2	VQ motif-containing protein
AT2G41230	5	.	.	.	.	1.99733	0.679667	2.734	0.651333	1.088	ORS1	ORGAN SIZE-like protein
AT2G41410	5	.	.	.	.	1.04695	106.994	219.475	113.009	129.052		Calcium-binding EF-hand family protein
AT2G41670	5	.	.	.	.	1.06447	3.42467	7.19833	3.428	3.88567		P-loop containing nucleoside triphosphate hydrolases superfamily protein
AT2G43140	5	.	.	.	.	3.02227	0.211667	1.82067	0.318667	0.511		basic helix-loop-helix (bHLH) DNA-binding superfamily protein
AT2G44290	5	.	.	.	.	1.34185	12.6327	31.9273	17.1283	22.2857		Bifunctional inhibitor/lipid-transfer protein/seed storage 2S albumin superfamily protein
AT2G44460	5	.	.	.	.	1.81439	0.292667	0.828667	0.0973333	0.363	BGLU28	beta glucosidase 28
AT2G46430	5	.	.	.	.	1.09952	10.2123	21.6247	13.2917	16.9887	CNGC3	cyclic nucleotide gated channel 3
AT2G46620	5	.	.	.	.	1.3237	9.847	24.5107	11.6143	12.1607		P-loop containing nucleoside triphosphate hydrolases superfamily protein
AT2G46830	5	.	.	.	.	1.18443	2.73233	6.395	3.92533	3.56833	CCA1	circadian clock associated 1
AT3G01800	5	.	.	.	.	1.04191	8.72167	17.9963	8.55033	10.594		Ribosome recycling factor
AT3G03060	5	.	.	.	.	1.41497	3.702	9.85633	4.115	5.03067		P-loop containing nucleoside triphosphate hydrolases superfamily protein
AT3G03440	5	.	.	.	.	1.34086	5.09867	12.816	6.99367	7.73867		ARM repeat superfamily protein
AT3G04120	5	.	.	.	.	1.03817	322.517	657.301	372.798	400.877	GAPC1	glyceraldehyde-3-phosphate dehydrogenase C subunit 1
AT3G07195	5	.	.	.	.	1.33946	6.55167	16.525	7.49833	9.191		RPM1-interacting protein 4 (RIN4) family protein
AT3G08590	5	.	.	.	.	1.1778	41.4403	94.201	48.4877	51.337	iPGAM2	Phosphoglycerate mutase, 2,3-bisphosphoglycerate-independent
AT3G08690	5	.	.	.	.	1.01476	25.2423	50.7643	28.237	35.8953	UBC11	ubiquitin-conjugating enzyme 11
AT3G09600	5	.	.	.	.	1.25779	1.18	2.84267	2.12733	1.701	RVE8	Homeodomain-like superfamily protein
AT3G11080	5	.	.	.	.	1.35427	0.575	1.46367	0.551	0.701333	RLP35	receptor like protein 35
AT3G12220	5	.	.	.	.	1.52065	1.26633	3.57533	1.78967	2.46033	scpl16	serine carboxypeptidase-like 16
AT3G15340	5	.	-1.81894	.	.	.	0.342333	0.858333	0.465	0.218667	PPI2	proton pump interactor 2
AT3G16030	5	.	.	.	.	1.13259	2.36133	5.139	2.61033	2.87233	CES101	lectin protein kinase family protein
AT3G17611	5	.	.	.	.	1.17661	2.482	5.458	3.15433	3.67733	RBL14	RHOMBOID-like protein 14
AT3G17700	5	.	.	.	.	1.21523	10.5083	24.2547	11.4007	12.201	CNBT1	cyclic nucleotide-binding transporter 1
AT3G17790	5	.	.	.	.	1.08693	14.9457	31.4543	19.66	18.669	PAP17	purple acid phosphatase 17
AT3G18610	5	.	.	.	.	1.93651	0.735	2.75967	1.08367	1.372	NUC-L2	nucleolin like 2
AT3G23560	5	.	.	.	.	1.12708	4.36167	9.429	4.95733	5.19533	ALF5	MATE efflux family protein
AT3G25010	5	.	-1.24188	.	.	1.5656	2.819	8.602	3.56867	3.55167	RLP41	receptor like protein 41
AT3G28540	5	.	.	.	.	1.32062	19.5857	48.009	25.4253	33.6253		P-loop containing nucleoside triphosphate hydrolases superfamily protein
AT3G47090	5	.	.	.	.	1.4003	1.25433	3.30233	1.64767	1.75567		Leucine-rich repeat protein kinase family protein
AT3G47420	5	.	.	.	.	1.11023	5.72733	12.2047	9.624	8.542	G3Pp1	putative glycerol-3-phosphate transporter 1
AT3G48080	5	.	.	.	.	1.10051	3.578	7.62667	3.54867	6.2		alpha/beta-Hydrolases superfamily protein
AT3G48310	5	.	.	.	.	1.0926	9.94233	21.0533	11.322	11.7347	CYP71A22	cytochrome P450, family 71, subfamily A, polypeptide 22
AT3G49370	5	.	.	.	.	1.20422	1.37333	3.21167	1.71	1.79		Calcium-dependent protein kinase (CDPK) family protein
AT3G51790	5	.	.	.	.	1.06145	8.809	18.3	10.2547	11.857	G1	transmembrane protein G1P-related 1
AT3G52520	5	.	.	.	.	1.41998	2.54833	6.85767	2.60233	3.98033		hypothetical protein
AT3G54130	5	.	.	.	.	1.07018	8.05067	16.8603	8.05067	8.90667		Josephin family protein
AT3G59140	5	.	-1.10258	.	.	1.40282	3.054	8.022	3.687	3.67133	ABCC10	multidrug resistance-associated protein 14
AT3G60540	5	.	.	.	.	1.66364	4.69267	15.0773	6.767	9.85167		Preprotein translocase Sec, Sec61-beta subunit protein
AT3G61280	5	.	.	.	.	1.08872	9.985	21.201	12.8807	15.0707		O-glucosyltransferase rumi-like protein (DUF821)
AT3G62460	5	.	.	.	.	1.49329	2.44567	6.943	3.68767	4.611		Putative endonuclease or glycosyl hydrolase
AT4G01070	5	.	.	.	.	1.30867	30.069	73.4047	41.882	39.9153	GT72B1	UDP-Glycosyltransferase superfamily protein
AT4G01750	5	.	.	.	.	1.34102	2.88567	7.303	3.068	3.73933	RGXT2	rhamnogalacturonan xylosyltransferase 2
AT4G02220	5	.	.	.	.	1.09865	9.056	19.3373	11.406	14.763		zinc finger (MYND type) family protein / programmed cell death 2 C-terminal domain-containing protein
AT4G04620	5	.	.	.	.	1.03865	12.045	25.0007	14.302	16.7117	ATG8B	Ubiquitin-like superfamily protein
AT4G05390	5	.	.	.	.	1.14391	9.76067	22.097	11.4713	12.2133	RFNR1	root FNR 1
AT4G08760	5	.	.	.	.	1.11034	2.001	4.26	2.69333	2.03433		hypothetical protein
AT4G08850	5	.	.	.	.	1.08029	23.018	48.2553	23.4117	29.0147		Leucine-rich repeat receptor-like protein kinase family protein
AT4G11470	5	.	.	.	.	2.45331	0.075	0.463333	0.113667	0.134	CRK31	cysteine-rich RLK (RECEPTOR-like protein kinase) 31
AT4G11521	5	.	.	1.08993	.	1.46014	3.52767	9.69133	6.83067	7.44233		Receptor-like protein kinase-related family protein
AT4G11840	5	.	.	.	.	1.03908	6.808	13.907	7.366	9.93	PLDGAMMA3	phospholipase D gamma 3
AT4G13920	5	.	.	.	.	1.15061	2.85433	6.30867	3.435	3.74367	RLP50	receptor like protein 50
AT4G14220	5	.	.	.	.	1.38473	11.734	30.5017	15.553	18.9207	RHF1A	RING-H2 group F1A
AT4G14368	5	.	-3.74597	.	.	3.93424	0.0326667	0.525333	0.0623333	0.0386667		Regulator of chromosome condensation (RCC1) family protein
AT4G15233	5	.	-1.10852	.	.	1.4448	1.33733	3.68633	1.283	1.643	ABCG42	ABC-2 and Plant PDR ABC-type transporter family protein
AT4G15236	5	.	-2.67289	.	.	2.64217	0.121667	0.757333	0.0973333	0.109333	ABCG43	ABC-2 and Plant PDR ABC-type transporter family protein
AT4G15975	5	.	.	.	.	1.74844	1.152	3.81633	1.06433	1.67233		RING/U-box superfamily protein
AT4G17615	5	.	.	.	.	1.03508	16.7567	33.9497	19.7237	21.737	CBL1	calcineurin B-like protein 1
AT4G17720	5	.	.	.	.	1.17276	24.506	54.8933	27.463	30.8527		RNA-binding (RRM/RBD/RNP motifs) family protein
AT4G20780	5	.	.	.	.	1.26791	11.4063	27.4123	12.8197	16.332	CML42	calmodulin like 42
AT4G21903	5	.	.	.	.	2.21242	0.622	2.81967	1.076	1.16933		MATE efflux family protein
AT4G22690	5	.	.	.	.	1.08594	148.035	312.295	178.235	192.054	CYP706A1	cytochrome P450, family 706, subfamily A, polypeptide 1
AT4G22980	5	.	.	.	.	1.51052	2.112	5.96067	2.45333	3.16633		molybdenum cofactor sulfurase-like protein
AT4G23030	5	.	.	.	.	1.47553	0.979	2.75667	1.63667	1.451		MATE efflux family protein
AT4G23130	5	.	.	.	.	1.22526	3.28667	7.67767	5.46933	6.32433	CRK5	cysteine-rich RLK (RECEPTOR-like protein kinase) 5
AT4G23200	5	.	.	.	.	1.25525	1.21	2.90233	2.13933	2.444	CRK12	cysteine-rich RLK (RECEPTOR-like protein kinase) 12
AT4G23280	5	.	.	.	.	3.67426	0.0616667	0.875667	0.156667	0.198	CRK20	cysteine-rich RLK (RECEPTOR-like protein kinase) 20
AT4G23310	5	.	.	.	.	2.41887	0.115	0.645667	0.256333	0.328667	CRK23	cysteine-rich RLK (RECEPTOR-like protein kinase) 23
AT4G23320	5	.	.	.	.	1.47851	0.581	1.63733	1.12033	1.32833	CRK24	cysteine-rich RLK (RECEPTOR-like protein kinase) 24
AT4G23570	5	.	.	.	.	1.10284	29.887	62.647	31.8717	42.3877	SGT1A	phosphatase-like protein
AT4G24920	5	.	.	.	.	1.03011	61.714	125.158	68.387	93.965		secE/sec61-gamma protein transport protein
AT4G26910	5	.	-1.01199	.	.	1.23837	33.826	82.0513	39.8693	40.41		Dihydrolipoamide succinyltransferase
AT4G26990	5	.	-1.03888	.	.	1.43762	2.32767	6.30033	2.92667	3.03367		polyadenylate-binding protein interacting protein
AT4G27300	5	.	.	.	.	1.38421	13.7107	35.6093	19.0393	21.4967		S-locus lectin protein kinase family protein
AT4G28350	5	.	.	.	.	1.07593	1.81267	3.75267	2.52733	1.81567		Concanavalin A-like lectin protein kinase family protein
AT4G28490	5	.	.	.	.	1.25452	4.66033	11.041	5.68133	5.77733	HAE	Leucine-rich receptor-like protein kinase family protein
AT4G29740	5	.	.	.	.	1.23068	9.05933	21.1857	9.15067	11.841	CKX4	cytokinin oxidase 4
AT4G31500	5	.	.	.	.	1.03131	150.215	304.929	166.541	185.42	CYP83B1	cytochrome P450, family 83, subfamily B, polypeptide 1
AT4G31810	5	.	.	.	.	1.03858	9.541	19.5303	9.47033	10.6773		ATP-dependent caseinolytic (Clp) protease/crotonase family protein
AT4G36580	5	.	-1.02151	.	.	1.3411	2.70667	6.83033	3.29267	3.27933		AAA-type ATPase family protein
AT4G36640	5	.	.	.	.	1.14376	8.046	17.8477	9.585	10.0123		Sec14p-like phosphatidylinositol transfer family protein
AT4G39780	5	.	.	.	.	1.13923	4.366	9.50167	6.78633	7.509		Integrase-type DNA-binding superfamily protein
AT4G40020	5	.	.	.	.	2.13534	0.131667	0.572333	0.212	0.138		Myosin heavy chain-related protein
AT5G09290	5	.	.	.	.	2.06299	0.405667	1.74633	0.439667	0.651333		Inositol monophosphatase family protein
AT5G09590	5	.	.	.	.	1.19572	24.9873	56.8873	27.8213	31.212	MTHSC70-2	mitochondrial HSO70 2
AT5G14580	5	.	.	.	.	1.07773	3.62533	7.60133	3.44167	3.99667		polyribonucleotide nucleotidyltransferase
AT5G14760	5	.	-1.09264	.	.	1.40396	1.59567	4.19967	2.11133	1.937	AO	L-aspartate oxidase
AT5G15850	5	.	.	.	.	1.72156	2.73567	9.013	4.08467	4.756	COL1	CONSTANS-like 1
AT5G17000	5	.	.	.	.	1.05307	21.1703	43.4343	25.252	23.082		Zinc-binding dehydrogenase family protein
AT5G18780	5	.	.	.	.	1.10617	4.70033	10.037	4.43433	5.339		F-box/RNI-like superfamily protein
AT5G19240	5	.	.	.	.	1.29685	29.93	73.073	41.7913	54.174		Glycoprotein membrane precursor GPI-anchored
AT5G20400	5	.	.	.	.	1.45684	2.45733	6.833	2.772	3.41933		2-oxoglutarate (2OG) and Fe(II)-dependent oxygenase superfamily protein
AT5G22350	5	.	.	.	.	1.22073	10.351	23.99	11.9927	12.7653	ELM1	fission ELM1-like protein (DUF1022)
AT5G24530	5	.	.	.	.	1.32153	18.9913	47.0547	23.9727	29.5393	DMR6	2-oxoglutarate (2OG) and Fe(II)-dependent oxygenase superfamily protein
AT5G24655	5	.	.	.	.	1.522	3.58233	10.2263	6.03733	6.93067	LSU4	response to low sulfur 4
AT5G25820	5	.	-1.23896	.	.	1.48168	1.058	3.01	1.14733	1.232		Exostosin family protein
AT5G25920	5	.	.	.	.	3.40213	0.0993333	1.076	0.0863333	0.221333		hypothetical protein
AT5G26170	5	.	.	.	.	1.61971	2.178	6.69367	2.46667	3.353	WRKY50	WRKY DNA-binding protein 50
AT5G35735	5	.	.	.	.	1.18039	62.649	140.912	74.25	84.4263		Auxin-responsive family protein
AT5G38200	5	.	.	.	.	1.5936	0.686333	2.125	0.725667	0.882		Class I glutamine amidotransferase-like superfamily protein
AT5G38210	5	.	.	.	.	1.17748	6.57067	14.6653	7.86933	7.934		Protein kinase family protein
AT5G38250	5	.	.	.	.	2.16839	0.180333	0.804	0.233	0.208667		Protein kinase family protein
AT5G42150	5	.	.	.	.	1.19073	10.048	22.8743	10.8583	12.739		Glutathione S-transferase family protein
AT5G44390	5	.	.	.	.	1.04794	3.001	6.175	3.10133	3.29		FAD-binding Berberine family protein
AT5G45000	5	.	.	.	.	1.82631	0.949333	3.356	1.16967	1.86667		Disease resistance protein (TIR-NBS-LRR class) family
AT5G45380	5	.	.	.	.	1.57254	1.84567	5.51333	2.749	3.079	DUR3	urea-proton symporter DEGRADATION OF UREA 3 (DUR3)
AT5G49680	5	.	-1.09531	.	.	1.31229	0.644333	1.593	0.610333	0.741		SABRE-like protein
AT5G52810	5	.	.	.	.	1.50693	8.066	22.8573	10.434	12.516		NAD(P)-binding Rossmann-fold superfamily protein
AT5G54960	5	.	.	.	.	1.07471	80.033	167.521	88.1067	95.2767	PDC2	pyruvate decarboxylase-2
AT5G55460	5	.	.	.	.	1.5109	6.51667	18.7133	10.248	11.132		Bifunctional inhibitor/lipid-transfer protein/seed storage 2S albumin superfamily protein
AT5G56010	5	.	.	.	.	1.10655	90.1967	192.876	116.412	138.505	HSP81-3	heat shock protein 81-3
AT5G56030	5	.	.	.	.	1.2855	115.773	280.382	130.221	150.923	HSP81-2	heat shock protein 81-2
AT5G58610	5	.	-1.58237	.	.	1.48922	0.237333	0.639333	0.260333	0.208333		PHD finger transcription factor
AT5G58940	5	.	.	.	.	1.36515	2.438	6.297	2.96	3.19467	CRCK1	calmodulin-binding receptor-like cytoplasmic kinase 1
AT5G59680	5	.	.	.	.	1.41515	0.351667	0.941333	0.406	0.593		Leucine-rich repeat protein kinase family protein
AT5G60250	5	.	-1.50013	.	.	1.4391	0.507	1.356	0.472667	0.466		zinc finger (C3HC4-type RING finger) family protein
AT5G60900	5	.	.	.	.	1.41777	8.86733	23.5537	12.5527	15.5527	RLK1	receptor-like protein kinase 1
AT5G60950	5	.	.	.	.	1.42811	4.633	12.501	5.65767	7.149	COBL5	COBRA-like protein 5 precursor
AT5G62770	5	.	.	.	.	1.34827	3.11467	7.93067	3.23767	4.003		membrane-associated kinase regulator, putative (DUF1645)
AT5G66620	5	.	-1.24362	.	.	1.57711	1.22067	3.57267	1.65067	1.46933	DAR6	DA1-related protein 6
AT5G67600	5	.	.	.	.	1.12569	100.403	217.301	102.506	120.872	WIH1	cysteine-rich TM module stress tolerance protein
AT1G01420	6	.	1.00785	.	.	.	5.28933	4.26367	6.52367	8.198	UGT72B3	UDP-glucosyl transferase 72B3
AT1G04570	6	.	.	.	1.20511	.	1.298	1.325	3.05333	2.70533		Major facilitator superfamily protein
AT1G09240	6	.	1.04851	.	.	.	7.29133	5.585	10.598	11.515	NAS3	nicotianamine synthase 3
AT1G11700	6	.	1.10871	.	.	.	58.7183	49.4887	91.8743	104.879		senescence regulator (Protein of unknown function, DUF584)
AT1G13080	6	.	1.55967	.	.	.	7.04	4.623	9.50933	12.858	CYP71B2	cytochrome P450, family 71, subfamily B, polypeptide 2
AT1G20070	6	.	1.1667	1.24182	.	.	11.2217	11.9763	16.0943	26.5897		hypothetical protein
AT1G48745	6	.	.	1.19954	.	.	2.507	3.07167	4.137	5.832		hypothetical protein
AT1G49560	6	.	1.13518	.	.	.	11.4837	8.65167	16.5203	18.7177		Homeodomain-like superfamily protein
AT1G53700	6	.	.	1.53366	1.52106	.	0.631667	0.984333	1.81567	1.839	WAG1	WAG 1
AT1G56600	6	.	1.44342	.	.	.	14.057	9.15733	23.269	24.297	GolS2	galactinol synthase 2
AT1G59930	6	.	1.97046	.	.	.	4.702	2.601	8.94233	10.579		MADS-box family protein
AT1G66820	6	.	1.39286	.	.	.	43.1023	30.1097	62.109	78.0513		glycine-rich protein
AT1G67330	6	.	.	.	1.13581	.	3.52967	5.13933	7.73267	6.45633		glucuronoxylan 4-O-methyltransferase-like protein (DUF579)
AT1G69530	6	.	1.21913	.	.	.	109.301	73.0333	179.99	168.347	EXPA1	expansin A1
AT1G70230	6	.	.	.	1.02477	.	8.11133	9.73167	16.529	15.3617	TBL27	TRICHOME BIREFRINGENCE-LIKE 27
AT1G70985	6	.	2.64002	.	.	.	1.4	0.415667	2.08933	3.505		hydroxyproline-rich glycoprotein family protein
AT1G73870	6	.	1.28073	.	.	.	10.053	6.83267	17.5517	16.2493	BBX16	B-box type zinc finger protein with CCT domain-containing protein
AT1G75580	6	.	1.20033	1.34906	.	.	4.29	4.92867	8.13467	10.951		SAUR-like auxin-responsive protein family
AT1G76240	6	.	1.45161	1.12348	.	.	3.53867	2.74367	6.04767	7.63533		DUF241 domain protein (DUF241)
AT1G78070	6	.	1.1781	.	.	.	43.044	33.1297	77.1603	73.5013		Transducin/WD40 repeat-like superfamily protein
AT1G78100	6	.	1.53413	.	.	.	14.2203	8.964	24.0513	25.614	AUF1	F-box family protein
AT1G79110	6	.	.	1.18236	.	.	7.06333	8.284	12.4257	15.9033	BRG2	zinc ion binding protein
AT2G01290	6	.	.	1.31279	1.07067	.	13.3887	18.804	28.1463	33.233	RPI2	ribose-5-phosphate isomerase 2
AT2G03090	6	.	1.13114	.	.	.	12.2513	9.34567	16.9593	20.094	EXPA15	expansin A15
AT2G15020	6	.	1.5057	1.73991	1.51539	.	0.939	1.11033	2.688	3.131		hypothetical protein
AT2G17972	6	.	1.0404	.	.	.	63.4397	49.0517	80.0663	98.9443		transmembrane protein
AT2G19650	6	.	1.17681	1.21138	1.64815	.	1.108	1.13167	3.45433	2.52033		Cysteine/Histidine-rich C1 domain family protein
AT2G21210	6	.	2.02339	1.32677	1.07412	.	25.55	15.9893	53.7383	65.7143		SAUR-like auxin-responsive protein family
AT2G21320	6	.	1.15507	.	.	.	7.19533	5.53833	10.3543	12.4217	BBX18	B-box zinc finger family protein
AT2G21480	6	.	1.17245	.	.	.	2.586	1.98567	3.27233	4.37967		Malectin/receptor-like protein kinase family protein
AT2G23670	6	.	1.16135	.	.	.	187.982	155.1	290.554	340.916	YCF37	homolog of Synechocystis YCF37
AT2G28720	6	.	1.04127	.	.	.	95.9773	74.9323	131.885	151.731		Histone superfamily protein
AT2G31380	6	.	1.11941	.	.	.	7.17633	6.178	11.7233	13.241	STH	salt tolerance homologue
AT2G35700	6	.	1.42385	.	.	.	3.93333	2.61133	5.73067	7.02033	ERF38	ERF family protein 38
AT2G39710	6	.	1.01207	1.39913	1.00596	.	4.71967	6.33467	9.44033	12.4087		Eukaryotic aspartyl protease family protein
AT2G40230	6	.	1.00463	.	.	.	4.58933	3.683	7.27667	7.18033		HXXXD-type acyl-transferase family protein
AT2G40475	6	.	1.54495	1.02805	.	.	9.27133	6.506	12.598	18.959	ASG8	hypothetical protein
AT2G44940	6	.	2.19772	1.86876	1.35944	.	7.88167	6.31533	20.168	28.8327		Integrase-type DNA-binding superfamily protein
AT2G46660	6	.	.	1.18615	.	.	1.07233	1.12167	2.12067	2.39333	CYP78A6	cytochrome P450, family 78, subfamily A, polypeptide 6
AT2G46870	6	.	1.24755	.	.	.	4.70367	3.634	9.384	8.46667	NGA1	AP2/B3-like transcriptional factor family protein
AT3G01660	6	.	1.02022	.	.	.	8.05333	6.18267	11.404	12.431		S-adenosyl-L-methionine-dependent methyltransferases superfamily protein
AT3G04140	6	.	1.06192	.	1.01502	.	3.01167	2.67167	6.07133	5.531		Ankyrin repeat family protein
AT3G05660	6	.	1.0055	1.1389	.	.	4.89567	5.45467	9.08667	10.7263	RLP33	receptor like protein 33
AT3G11090	6	.	1.02354	1.13603	.	.	7.91433	8.696	12.8493	17.5133	LBD21	LOB domain-containing protein 21
AT3G22840	6	.	.	1.16237	.	.	2.786	3.34467	3.74467	6.10633	ELIP1	Chlorophyll A-B binding family protein
AT3G44450	6	.	1.64241	2.09497	1.61458	.	14.284	19.7573	43.636	60.6473		hypothetical protein
AT3G44990	6	.	1.93869	1.7819	1.34517	.	29.151	26.5793	73.921	99.8913	XTH31	xyloglucan endo-transglycosylase-related 8
AT3G45210	6	.	1.72339	1.76632	1.35116	.	4.51567	4.744	11.5457	15.354		transcription initiation factor TFIID subunit (Protein of unknown function, DUF584)
AT3G47500	6	.	1.16099	.	.	.	30.178	22.6687	48.2667	49.6997	CDF3	cycling DOF factor 3
AT3G51750	6	.	1.1412	1.11987	.	.	9.75467	9.525	16.1483	20.4833		hypothetical protein
AT3G52740	6	.	1.47626	1.15961	.	.	8.257	6.692	14.7973	18.4287		hypothetical protein
AT3G58070	6	.	1.5229	.	1.18744	.	2.19567	1.65433	5.00633	4.63333	GIS	C2H2 and C2HC zinc fingers superfamily protein
AT4G02420	6	.	.	1.00679	.	.	7.56833	8.274	11.7357	15.133		Concanavalin A-like lectin protein kinase family protein
AT4G03050	6	.	.	1.01361	1.15079	.	2.252	2.494	5.02033	4.54533	AOP3	2-oxoglutarate-dependent dioxygenase
AT4G03070	6	.	1.30825	.	.	.	5.85267	3.985	8.43533	9.78067	AOP1	2-oxoglutarate (2OG) and Fe(II)-dependent oxygenase superfamily protein
AT4G09350	6	.	1.03144	.	.	.	9.083	7.367	12.58	14.797	NdhT	Chaperone DnaJ-domain superfamily protein
AT4G12320	6	.	1.41161	1.20204	1.02052	.	32.617	28.6803	66.0607	74.877	CYP706A6	cytochrome P450, family 706, subfamily A, polypeptide 6
AT4G15248	6	.	2.27826	3.42183	2.73187	.	0.754333	1.78567	5.229	8.339	BBX30	B-box type zinc finger family protein
AT4G16880	6	.	1.10303	.	.	.	17.8733	14.792	28.9663	31.2937		Leucine-rich repeat (LRR) family protein
AT4G18422	6	.	1.98992	.	.	.	6.68733	4.365	9.81733	16.581		transmembrane protein
AT4G24700	6	.	1.79545	.	.	.	2.40633	1.59467	3.42033	5.32833		hypothetical protein
AT4G27030	6	.	1.22318	.	.	.	4.215	3.41433	7.57233	8.00433	FADA	fatty acid desaturase A
AT4G29110	6	.	.	1.0529	.	.	9.115	9.85167	16.0267	18.8927		cotton fiber protein
AT4G36240	6	.	1.10515	.	.	.	9.10733	6.687	12.574	14.371	GATA7	GATA transcription factor 7
AT5G01790	6	.	1.65952	1.01484	.	.	12.9767	8.34367	23.275	26.1503		hypothetical protein
AT5G02180	6	.	1.36601	.	.	.	8.537	5.55933	12.8277	14.2687		Transmembrane amino acid transporter family protein
AT5G02190	6	.	1.84052	1.61932	1.42416	.	2.73367	2.34633	7.32567	8.397	PCS1	Eukaryotic aspartyl protease family protein
AT5G04950	6	.	1.39264	1.25671	.	.	11.861	10.966	22.776	28.2393	NAS1	nicotianamine synthase 1
AT5G10410	6	.	1.03164	.	.	.	4.559	3.96367	8.149	7.84		ENTH/ANTH/VHS superfamily protein
AT5G11590	6	.	1.88538	1.5725	1.40529	.	1.906	1.60833	5.04067	5.56033	TINY2	Integrase-type DNA-binding superfamily protein
AT5G20150	6	.	.	.	1.00994	.	10.458	11.288	21.082	17.9423	SPX1	SPX domain-containing protein 1
AT5G20700	6	.	1.18755	.	.	.	173.694	138.671	324.158	309.93		senescence-associated family protein, putative (DUF581)
AT5G28910	6	.	.	1.1073	1.02662	.	1.12267	1.097	2.30867	2.443		alpha-(1,6)-fucosyltransferase
AT5G35480	6	.	1.29469	.	.	.	121.5	86.1423	188.663	207.904		hypothetical protein
AT5G36790	6	.	1.42499	.	.	.	76.3597	48.176	128.436	127.307		Haloacid dehalogenase-like hydrolase (HAD) superfamily protein
AT5G38430	6	.	1.24167	.	.	.	1483.58	1140.73	2116.82	2703.86	RBCS1B	Ribulose bisphosphate carboxylase (small chain) family protein
AT5G43070	6	.	1.02033	.	.	.	9.06633	7.46633	11.6733	15.014	WPP1	WPP domain protein 1
AT5G45820	6	.	2.25961	1.70303	1.57483	.	8.62433	5.87833	25.718	28.065	CIPK20	CBL-interacting protein kinase 20
AT5G46830	6	.	2.08066	.	.	.	1.43033	0.67	2.85767	2.756	NIG1	calcium-binding transcription factor NIG1
AT5G51720	6	.	1.02735	.	.	.	90.3847	74.8747	122.846	149.987	NEET	2 iron, 2 sulfur cluster binding protein
AT5G52780	6	.	1.1738	.	.	.	24.465	20.837	33.0627	46.263		transmembrane protein, putative (DUF3464)
AT5G54470	6	.	.	1.04853	.	.	3.615	4.236	6.67767	7.40433	BBX29	B-box type zinc finger family protein
AT5G55250	6	.	1.43209	.	.	.	3.31967	2.24367	5.56633	5.84433	IAMT1	IAA carboxylmethyltransferase 1
AT5G55620	6	.	1.98186	1.19139	.	.	25.8497	15.0433	47.1653	58.9853		hypothetical protein
AT5G56860	6	.	1.1249	.	.	.	8.74233	6.92767	14.1877	14.984	GNC	GATA type zinc finger transcription factor family protein
AT5G57345	6	.	1.03236	.	.	.	207.991	168.397	323.342	337.817		transmembrane protein
AT5G59320	6	.	1.00319	.	.	.	79.5	67.8343	76.1897	133.194	LTP3	lipid transfer protein 3
AT5G60890	6	.	1.11908	.	.	.	9.59233	7.44933	12.854	15.9887	MYB34	myb domain protein 34
AT5G61420	6	.	1.00375	.	.	.	39.4353	29.7783	57.9557	58.624	MYB28	myb domain protein 28
AT5G61570	6	.	.	.	1.05651	.	3.56967	3.34967	7.61	6.15367		Protein kinase superfamily protein
AT5G62140	6	.	1.08838	.	.	.	14.6733	11.1063	22.438	23.1423		ATP-dependent Clp protease ATP-binding subunit
AT5G66740	6	.	.	1.63878	1.54972	.	0.422333	0.491333	1.303	1.36967		spindle assembly abnormal protein (DUF620)
AT5G67280	6	.	1.44099	.	.	.	11.6007	7.96333	19.181	21.167	RLK	receptor-like kinase
AT5G67390	6	.	1.68575	1.28615	1.10885	.	6.433	4.81533	13.9413	15.8567		glycosyltransferase-like protein
AT1G18300	7	.	-1.53528	.	-1.55745	.	24.8303	33.5497	8.418	11.2853	NUDT4	nudix hydrolase homolog 4
AT1G23390	7	.	-1.44774	-1.61356	-1.2136	.	148.036	134.194	63.802	48.3847		Kelch repeat-containing F-box family protein
AT1G32170	7	.	-2.0325	-1.72576	-1.4364	.	5.26167	6.57733	1.92833	1.531	XTH30	xyloglucan endotransglucosylase/hydrolase 30
AT1G32928	7	.	-2.07435	-1.25877	-1.12638	.	25.273	45.1673	11.4733	10.465		Avr9/Cf-9 rapidly elicited protein
AT1G36370	7	.	-1.34174	-1.31339	-1.23086	.	46.821	48.579	19.912	18.8677	SHM7	serine hydroxymethyltransferase 7
AT1G57990	7	.	-1.93805	-1.15284	.	.	56.027	98.25	31.2027	25.127	PUP18	purine permease 18
AT1G68840	7	.	-1.9175	-1.55749	-1.38232	.	104.253	135.726	40.5307	34.8177	RAV2	related to ABI3/VP1 2
AT1G69890	7	.	-1.83552	-1.11478	-1.03454	.	52.0047	87.0523	25.3583	23.9463		actin cross-linking protein (DUF569)
AT1G70290	7	.	-1.94031	-1.96263	-1.4776	.	82.6757	83.392	29.5913	21.3733	TPS8	trehalose-6-phosphatase synthase S8
AT1G70700	7	.	-1.41037	.	.	.	268.198	308.99	126.072	120.744	TIFY7	TIFY domain/Divergent CCT motif family protein
AT1G72260	7	.	-2.21847	-1.88703	.	.	4.176	5.27833	2.07733	1.06733	THI2.1	thionin 2.1
AT1G73500	7	.	-1.87306	-1.11485	.	.	50.4523	86.7017	26.4643	23.1923	MKK9	MAP kinase kinase 9
AT1G73540	7	.	-1.53196	-1.41044	-1.56044	.	58.0007	64.0357	19.602	21.6203	NUDT21	nudix hydrolase homolog 21
AT1G75490	7	.	-2.75756	-2.50132	-1.16889	.	3.37533	4.00433	1.48567	0.558333		Integrase-type DNA-binding superfamily protein
AT1G76640	7	.	-3.36563	.	.	.	2.80267	4.19167	0.730667	0.336333		Calcium-binding EF-hand family protein
AT1G76650	7	.	-1.85335	.	.	.	59.5577	89.1193	26.7857	25.4237	CML38	calmodulin-like 38
AT1G80440	7	.	-2.10435	-2.1667	-1.51093	.	123.264	120.053	43.199	27.5027		Galactose oxidase/kelch repeat superfamily protein
AT1G80920	7	.	-1.55703	-2.03816	-1.60007	.	495.391	360.735	163.362	120.567	J8	Chaperone DnaJ-domain superfamily protein
AT2G02710	7	.	-1.5344	-1.46837	-1.14985	.	47.6767	50.2783	21.401	17.1507	PLPB	PAS/LOV protein B
AT2G18700	7	.	-1.95733	-2.14008	-1.76029	.	88.2297	78.9543	26.0277	19.957	TPS11	trehalose phosphatase/synthase 11
AT2G24240	7	.	-1.68902	-1.48807	-1.45252	.	10.4227	12.222	3.81167	3.72967		BTB/POZ domain with WD40/YVTN repeat-like protein
AT2G24550	7	.	-2.29415	-2.2698	-1.86138	.	110.059	113.661	30.2197	22.7043		major centromere autoantigen B-like protein
AT2G28120	7	.	-1.81314	-1.59515	-1.04289	.	6.821	8.042	3.29867	2.22133		Major facilitator superfamily protein
AT2G38790	7	.	-2.48021	-1.5512	.	.	16.4797	31.9107	9.12467	5.52267		hypothetical protein
AT2G45170	7	.	-1.57758	-1.34191	-1.09588	.	82.6177	98.9447	38.582	32.6613	ATG8E	AUTOPHAGY 8E
AT3G07350	7	.	-2.00469	-2.53551	-2.08536	.	37.722	26.4037	8.858	6.397		sulfate/thiosulfate import ATP-binding protein, putative (DUF506)
AT3G09940	7	.	-2.6984	-1.88987	.	.	11.793	21.1323	4.16233	3.27767	MDHAR	monodehydroascorbate reductase
AT3G10020	7	.	-1.62582	-1.65167	-1.34351	.	514.878	504.472	197.891	158.713		plant/protein
AT3G15630	7	.	-1.71362	-2.09447	-1.70182	.	117.712	91.8937	36.0617	27.617		plant/protein
AT3G19580	7	.	-1.71454	-1.28744	-1.5439	.	15.7353	21.463	5.44767	6.689	ZF2	zinc-finger protein 2
AT3G30775	7	.	-1.82028	-1.82698	-1.17997	.	25.7093	25.953	11.342	7.23467	ERD5	Methylenetetrahydrofolate reductase family protein
AT3G45060	7	.	-1.98418	-1.54995	-1.38706	.	6.253	8.60833	2.35667	2.132	NRT2.6	high affinity nitrate transporter 2.6
AT3G47340	7	.	-1.93695	-1.93886	-1.49352	.	36.717	36.961	12.7873	9.30667	ASN1	glutamine-dependent asparagine synthase 1
AT3G49790	7	.	-1.78739	-1.65295	-1.59573	.	15.071	16.8303	4.97733	4.74567		Carbohydrate-binding protein
AT3G57520	7	.	-2.16971	-1.51514	-1.36791	.	78.0463	124.714	30.2013	27.274	SIP2	seed imbibition 2
AT3G59930	7	.	.	-2.06233	.	.	3.59733	5.83133	2.042	0.765333		defensin-like protein
AT4G01250	7	.	-1.54575	-1.44019	.	.	8.05467	8.857	3.58533	2.90267	WRKY22	WRKY family transcription factor
AT4G09250	7	.	-9.19015	-9.03098	.	.	2.963	4.00667	0.952667	0		SPla/RYanodine receptor (SPRY) domain-containing protein
AT4G17245	7	.	-2.04133	-1.21758	.	.	30.4653	54.6077	16.261	12.8787		RING/U-box superfamily protein
AT4G21830	7	.	-3.99688	-3.26373	.	.	5.66833	9.366	1.35967	0.561667	MSRB7	methionine sulfoxide reductase B7
AT4G27410	7	.	-1.9569	-1.50784	-1.2825	.	73.765	100.203	27.145	22.1153	RD26	NAC (No Apical Meristem) domain transcriptional regulator superfamily protein
AT4G27450	7	.	-1.41786	-1.42849	-1.11449	.	33.351	33.7803	15.4487	12.4473		aluminum induced protein with YGL and LRDR motifs
AT4G28140	7	.	-2.24379	-1.67781	.	.	16.4313	24.8507	5.604	5.10867		Integrase-type DNA-binding superfamily protein
AT4G28703	7	.	-1.58718	-1.38744	-1.40265	.	8.635	10.184	3.26633	3.222		RmlC-like cupins superfamily protein
AT4G29780	7	.	.	.	-2.10469	.	54.297	49.4747	12.6503	21.9987		nuclease
AT4G32480	7	.	-2.77544	-2.31073	-1.69039	.	22.3487	31.372	6.89167	4.42033		sugar phosphate exchanger, putative (DUF506)
AT4G33467	7	.	-1.40804	-1.56763	-1.36783	.	41.8803	38.0873	16.259	14.212		hypothetical protein
AT4G35770	7	.	-2.32164	-1.83212	-1.43235	.	33.1377	45.7593	12.4193	9.63767	SEN1	Rhodanese/Cell cycle control phosphatase superfamily protein
AT4G36670	7	.	-1.93859	-1.58302	-1.41504	.	63.5437	82.746	23.7967	21.1217	PMT6	Major facilitator superfamily protein
AT4G36850	7	.	-2.08246	-2.05667	-1.76093	.	10.462	10.7187	3.16633	2.51467		PQ-loop repeat family protein / transmembrane family protein
AT4G37410	7	.	.	-1.36766	.	.	25.7503	38.6803	14.9187	9.929	CYP81F4	cytochrome P450, family 81, subfamily F, polypeptide 4
AT5G02020	7	.	-2.53793	-1.70996	-1.47012	.	11.296	20.3583	4.09667	3.41533	SIS	E3 ubiquitin-protein ligase RLIM-like protein
AT5G13220	7	.	-2.09732	.	.	.	19.6953	31.241	6.923	7.35533	JAZ10	jasmonate-zim-domain protein 10
AT5G16370	7	.	-1.60981	-1.21921	.	.	24.7533	32.9003	13.1553	10.5747	AAE5	acyl activating enzyme 5
AT5G20250	7	.	-1.86582	-2.35112	-1.97025	.	80.902	58.5937	20.7507	15.927	DIN10	Raffinose synthase family protein
AT5G24420	7	.	.	-1.16383	.	.	45.9233	71.3127	23.2837	20.406	PGL5	6-phosphogluconolactonase 5
AT5G39610	7	.	-2.04428	-1.26975	.	.	11.245	19.6423	6.05333	4.703	NAC6	NAC domain containing protein 6
AT5G41080	7	.	-1.93139	-2.11331	-2.07046	.	5.60167	5.02333	1.39333	1.377	GDPD2	PLC-like phosphodiesterases superfamily protein
AT5G45340	7	.	.	-1.95204	-2.41313	.	14.8827	9.58	2.77267	3.82167	CYP707A3	cytochrome P450, family 707, subfamily A, polypeptide 3
AT5G49450	7	.	-1.91738	-1.41186	-1.2442	.	23.3343	33.72	9.79233	8.829	bZIP1	basic leucine-zipper 1
AT5G54170	7	.	-1.66558	-1.08372	-1.12244	.	48.575	73.9583	22.3247	22.8907		Polyketide cyclase/dehydrase and lipid transport superfamily protein
AT5G57560	7	.	-2.36796	-1.87306	.	.	77.6047	111.399	28.679	21.1413	TCH4	Xyloglucan endotransglucosylase/hydrolase family protein
AT5G61600	7	.	-2.03667	-1.55059	-1.65665	.	36.383	51.866	11.514	12.3233	ERF104	ethylene response factor 104
AT5G63160	7	.	-1.653	-1.47181	-1.19346	.	64.1523	73.3077	27.758	22.6693	BT1	BTB and TAZ domain protein 1
AT5G65207	7	.	-1.42446	-1.72424	-1.40191	.	165.393	136.491	62.624	49.965		hypothetical protein
AT5G67480	7	.	-1.8678	-1.41566	.	.	108.57	152.967	57.144	41.81	BT4	BTB and TAZ domain protein 4
AT1G03850	8	.	-3.49721	.	.	2.535	7.17067	41.3373	2.902	3.366	GRXS13	Glutaredoxin family protein
AT1G09500	8	.	-4.42075	.	.	3.19845	5.63967	49.0853	4.15267	2.13333		NAD(P)-binding Rossmann-fold superfamily protein
AT1G14870	8	.	-4.33878	.	.	3.50657	8.003	90.8303	4.425	4.49333	PCR2	PLANT CADMIUM RESISTANCE 2
AT1G25400	8	.	-3.66194	-2.26767	-2.22248	1.44024	31.2867	84.4923	6.67733	6.38367		transmembrane protein
AT1G43160	8	.	-4.17172	.	.	2.67933	5.69267	35.938	1.52133	1.93267	RAP2.6	related to AP2 6
AT1G61120	8	.	-3.65644	.	.	1.93421	7.145	27.0167	2.79633	2.09033	TPS04	terpene synthase 04
AT1G72060	8	.	-3.79411	.	-1.67942	2.46614	5.93433	32.8153	1.84967	2.36333		serine-type endopeptidase inhibitor
AT1G76600	8	.	-3.30765	-1.00521	-1.48738	2.33622	24.9587	125.102	8.861	12.3147		poly polymerase
AT1G80160	8	.	-4.13214	.	.	2.10832	4.95733	23.3043	2.452	1.221	GLYI7	Lactoylglutathione lyase / glyoxalase I family protein
AT2G22880	8	.	-3.34094	.	.	.	14.3737	38.2533	2.17633	3.37433		VQ motif-containing protein
AT2G26010	8	.	-4.69934	.	.	3.63556	46.626	576.257	39.903	21.5047	PDF1.3	plant defensin 1.3
AT2G26020	8	.	-4.48774	-1.2966	.	3.229	172.232	1606.24	183.791	69.961	PDF1.2b	plant defensin 1.2b
AT2G29350	8	.	-4.59778	.	.	3.68646	31.092	395.886	19.2683	16.052	SAG13	senescence-associated gene 13
AT2G43820	8	.	-3.65858	.	-1.07171	2.90109	15.8597	117.321	7.53133	9.158	UGT74F2	UDP-glucosyltransferase 74F2
AT2G45220	8	.	-4.56666	.	.	3.68983	5.15967	66.2577	2.737	2.727		Plant invertase/pectin methylesterase inhibitor superfamily
AT3G12500	8	.	-4.00569	.	.	3.06575	14.6847	121.974	13.8537	7.44567	HCHIB	basic chitinase
AT3G15500	8	.	-4.70834	-2.15253	-1.85516	2.60587	4.94467	29.8737	1.34867	1.072	NAC3	NAC domain containing protein 3
AT3G44300	8	.	-4.23859	-1.71394	.	2.55787	43.5303	253.843	18.491	13.2453	NIT2	nitrilase 2
AT3G60140	8	.	-5.2045	.	.	2.78166	4.546	31.0173	0.958333	0.819333	DIN2	Glycosyl hydrolase superfamily protein
AT4G15610	8	.	-4.15251	.	.	3.34967	5.582	56.9217	2.57267	3.08367		Uncharacterized protein family (UPF0497)
AT4G24000	8	.	-4.11921	.	.	2.93704	2.57267	20.981	1.39367	1.23233	CSLG2	cellulose synthase like G2
AT4G37990	8	.	-4.62635	.	.	3.59051	12.1617	144.906	6.45433	5.76733	ELI3-2	cinnamyl alcohol dehydrogenase 8
AT5G20230	8	.	-3.53117	.	.	2.70653	109.584	707.906	48.8823	60.2667	BCB	blue-copper-binding protein
AT5G42380	8	.	-3.65937	.	.	3.12661	4.71567	40.767	1.97633	3.11633	CML37	calmodulin like 37
AT5G44420	8	.	-4.37838	-1.65605	.	2.75915	598.162	4024.76	550.872	189.639	PDF1.2	plant defensin 1.2
AT5G44430	8	.	-5.05059	-1.87727	.	3.21138	359.65	3310.05	334.904	97.6953	PDF1.2c	plant defensin 1.2C
AT5G51190	8	.	-10.1448	.	.	.	3.32033	9.829	0	0		Integrase-type DNA-binding superfamily protein
AT5G59820	8	.	-3.97546	-1.28062	-1.73792	2.72888	27.0123	177.42	8.03067	10.9787	RHL41	C2H2-type zinc finger family protein
AT5G64750	8	.	-4.33241	.	.	2.99689	3.028	23.891	1.41233	1.13867	ABR1	Integrase-type DNA-binding superfamily protein
AT5G67080	8	.	-4.46629	.	.	2.84872	4.86633	34.7207	1.50133	1.475	MAPKKK19	mitogen-activated protein kinase kinase kinase 19
AT1G02520	9	.	-2.86026	.	.	2.63758	0.286667	1.84467	0.194	0.236333	ABCB11	P-glycoprotein 11
AT1G04280	9	.	-1.20963	.	.	1.04205	9.608	19.4733	8.69933	8.404		P-loop containing nucleoside triphosphate hydrolases superfamily protein
AT1G04980	9	.	-1.16675	.	.	1.3153	7.591	18.7893	7.919	8.17933	PDIL2-2	PDI-like 2-2
AT1G05880	9	.	-6.26599	.	.	3.834	0.0653333	1.107	0.163333	0.0106667	ARI12	RING/U-box superfamily protein
AT1G06570	9	.	-1.25719	.	.	.	20.05	39.1973	17.604	16.013	PDS1	4-hydroxyphenylpyruvate dioxygenase
AT1G08315	9	.	-1.17262	.	.	.	7.669	13.6213	6.756	5.82433		ARM repeat superfamily protein
AT1G08930	9	.	-1.19384	.	.	1.23897	87.7173	206.03	92.9507	88.4317	ERD6	Major facilitator superfamily protein
AT1G09940	9	.	-1.21509	.	.	.	16.9737	31.4787	13.842	13.2747	HEMA2	Glutamyl-tRNA reductase family protein
AT1G10050	9	.	.	.	.	1.01154	4.721	9.52933	4.43633	4.63533		glycosyl hydrolase family 10 protein / carbohydrate-binding domain-containing protein
AT1G10155	9	.	.	.	.	1.11083	1.555	3.397	1.70233	1.22467	PP2-A10	phloem protein 2-A10
AT1G11050	9	.	-1.02134	.	.	.	11.268	22.007	9.46133	10.589		Protein kinase superfamily protein
AT1G11100	9	.	-3.05175	.	.	2.62066	0.168333	1.01633	0.149	0.116667		SNF2 domain-containing protein / helicase domain-containing protein / zinc finger protein-like protein
AT1G12200	9	.	-1.20951	.	.	1.36397	3.89267	10.0437	4.821	4.24267	FMO	Flavin-binding monooxygenase family protein
AT1G12210	9	.	-1.19152	.	.	1.12784	1.54867	3.28667	1.18067	1.41133	RFL1	RPS5-like 1
AT1G12320	9	.	-1.00614	.	.	.	4.96267	9.158	4.06067	4.48		ankyrin repeat/KH domain protein (DUF1442)
AT1G12420	9	.	-1.08632	.	.	.	6.33533	10.1433	5.38367	4.83933	ACR8	ACT domain repeat 8
AT1G13210	9	.	-1.31095	.	.	1.16099	32.9727	73.22	30.189	28.9587	ACA.l	autoinhibited Ca2+/ATPase II
AT1G13990	9	.	-1.3815	.	.	1.12851	48.728	105.627	46.188	39.91		plant/protein
AT1G14060	9	.	.	.	.	1.003	19.5783	39.035	17.8773	20.5487		GCK domain-containing protein
AT1G14330	9	.	-1.04579	.	.	.	6.32867	11.1583	6.46967	5.29267		Galactose oxidase/kelch repeat superfamily protein
AT1G14360	9	.	.	.	.	1.00705	15.8813	31.772	15.6287	15.5933	UTR3	UDP-galactose transporter 3
AT1G14370	9	.	-1.37357	.	.	1.25372	10.814	25.6187	9.47467	9.66633	APK2A	protein kinase 2A
AT1G16300	9	.	.	.	.	1.09645	4.726	10.042	4.918	4.985	GAPCP-2	glyceraldehyde-3-phosphate dehydrogenase of plastid 2
AT1G16670	9	.	.	.	.	1.1203	10.6787	23.0987	8.719	11.4197		Protein kinase superfamily protein
AT1G17290	9	.	.	.	.	1.11468	94.3003	202.634	99.039	99.7543	AlaAT1	alanine aminotransferas
AT1G17860	9	.	-1.06472	.	.	1.15285	17.26	38.2217	15.7817	17.974		Kunitz family trypsin and protease inhibitor protein
AT1G20350	9	.	-1.38056	.	.	.	3.26233	5.53933	3.021	2.09733	TIM17-1	translocase inner membrane subunit 17-1
AT1G21130	9	.	.	.	.	1.16353	209.779	461.859	214.38	231.963	IGMT4	O-methyltransferase family protein
AT1G21400	9	.	-1.02132	.	.	.	20.4677	38.1437	17.821	18.559		Thiamin diphosphate-binding fold (THDP-binding) superfamily protein
AT1G22280	9	.	-1.07105	.	.	1.00404	40.7717	81.0233	35.9723	37.92	PAPP2C	phytochrome-associated protein phosphatase type 2C
AT1G23730	9	.	-1.07347	.	.	1.06394	8.59933	17.874	9.479	8.35767	BCA3	beta carbonic anhydrase 3
AT1G27720	9	.	-2.47542	.	.	1.71923	0.429333	1.53667	0.511667	0.216	TAF4B	TBP-associated factor 4B
AT1G29330	9	.	-1.68914	.	.	1.23426	8.29067	19.4137	8.21767	6.113	ERD2	ER lumen protein retaining receptor family protein
AT1G29640	9	.	-2.08071	.	.	.	1.34633	4.597	1.81267	1.049		senescence regulator (Protein of unknown function, DUF584)
AT1G29690	9	.	-1.19375	.	.	.	15.4817	30.0673	12.415	12.8597	CAD1	MAC/Perforin domain-containing protein
AT1G30370	9	.	-2.66014	.	.	2.61509	0.294667	1.826	0.183333	0.261667	DLAH	alpha/beta-Hydrolases superfamily protein
AT1G30420	9	.	-1.3492	.	.	1.31608	4.14367	10.224	4.02467	3.94233	ABCC11	multidrug resistance-associated protein 12
AT1G30620	9	.	-1.41712	.	.	1.27987	11.4657	27.2967	10.853	10.2367	MUR4	NAD(P)-binding Rossmann-fold superfamily protein
AT1G30640	9	.	-1.06891	.	.	.	7.76067	12.507	7.07867	5.91467		Protein kinase family protein
AT1G32127	9	.	-1.05466	.	.	.	3.99767	7.657	3.81633	3.62533		plant viral-response family protein
AT1G34180	9	.	-1.58146	.	.	1.47978	0.937	2.50033	0.910333	0.940333	NAC016	NAC domain containing protein 16
AT1G37130	9	.	-1.16543	.	.	.	128.235	241.367	109.598	105.719	NIA2	nitrate reductase 2
AT1G47890	9	.	-2.9264	.	.	3.14279	0.131667	1.15233	0.149	0.148	RLP7	receptor like protein 7
AT1G48370	9	.	-1.04153	.	.	.	5.53633	11.0413	5.288	4.91433	YSL8	YELLOW STRIPE like 8
AT1G49960	9	.	-3.29465	.	.	.	0.213	0.696667	0.243	0.0566667		Xanthine/uracil permease family protein
AT1G51620	9	.	.	.	.	1.56661	0.909	2.85767	0.882333	1.07433		Protein kinase superfamily protein
AT1G53470	9	.	-1.67262	.	.	.	1.19867	3.10067	1.023	0.947	MSL4	mechanosensitive channel of small conductance-like 4
AT1G53760	9	.	-1.03362	.	.	1.12275	10.0377	21.9253	10.0243	10.417		K+-H+ exchange-like protein
AT1G54100	9	.	-1.31541	.	.	.	70.3133	141.428	62.4923	56.285	ALDH7B4	aldehyde dehydrogenase 7B4
AT1G55530	9	.	-1.12119	.	.	1.06607	21.1987	43.9397	20.611	20.021		RING/U-box superfamily protein
AT1G56140	9	.	-1.15098	.	.	1.29123	6.185	15.0413	5.817	6.644		Leucine-rich repeat transmembrane protein kinase
AT1G56145	9	.	-1.34008	.	.	1.17127	3.86767	8.632	2.81233	3.383		Leucine-rich repeat transmembrane protein kinase
AT1G58190	9	.	-1.97968	.	.	.	0.531667	1.216	0.409667	0.3	RLP9	receptor like protein 9
AT1G61420	9	.	-1.21749	.	.	1.20895	2.218	5.423	1.99567	2.282		S-locus lectin protein kinase family protein
AT1G61640	9	.	-1.07468	.	.	1.31537	5.06133	12.5013	4.96933	5.80867		Protein kinase superfamily protein
AT1G62305	9	.	-1.27199	.	.	.	3.50733	7.50867	3.24533	3.181		Core-2/I-branching beta-1,6-N-acetylglucosaminyltransferase family protein
AT1G62422	9	.	-1.07368	.	.	1.07203	8.44933	17.687	7.532	8.22133		hypothetical protein
AT1G63440	9	.	-1.62191	.	.	1.37525	1.571	4.038	1.26267	1.30133	HMA5	heavy metal atpase 5
AT1G65610	9	.	.	.	.	2.12601	0.410667	1.78667	0.249667	0.328667	KOR2	Six-hairpin glycosidases superfamily protein
AT1G65820	9	.	-1.12073	.	.	1.02524	163.019	329.297	151.976	148.69		microsomal glutathione s-transferase
AT1G66480	9	.	-1.34518	.	.	1.41308	3.73933	9.95633	3.181	3.76967		plastid movement impaired 2
AT1G67000	9	.	-1.24985	.	.	.	1.337	3.00267	1.145	1.219		Protein kinase superfamily protein
AT1G67070	9	.	.	.	.	1.44601	1.36733	3.277	1.277	1.35867	DIN9	Mannose-6-phosphate isomerase, type I
AT1G67120	9	.	-1.0915	.	.	1.02996	3.07567	6.23167	2.63567	2.87967		midasin-like protein
AT1G67520	9	.	-1.51232	.	.	1.28596	1.06767	2.56867	0.958	0.935		lectin protein kinase family protein
AT1G68410	9	.	-1.01048	.	.	.	10.4147	17.3997	9.43733	8.38933		Protein phosphatase 2C family protein
AT1G69750	9	.	-1.1316	.	.	1.267	13.2727	28.102	15.734	14.1727	COX19-2	cytochrome c oxidase 19-2
AT1G69810	9	.	-2.16605	.	.	1.88212	0.578	2.122	0.643	0.431333	WRKY36	WRKY DNA-binding protein 36
AT1G70530	9	.	-1.15092	.	.	.	15.9287	30.292	12.0723	13.3833	CRK3	cysteine-rich RLK (RECEPTOR-like protein kinase) 3
AT1G71390	9	.	-1.95033	.	.	1.67846	0.408333	1.31233	0.257	0.339	RLP11	receptor like protein 11
AT1G71880	9	.	.	.	.	1.01475	27.7003	55.4693	25.8957	27.907	SUC1	sucrose-proton symporter 1
AT1G74870	9	.	.	.	.	1.98942	0.542	2.068	0.353333	0.664		RING/U-box superfamily protein
AT1G76930	9	.	-1.28823	.	.	.	73.2203	149.211	53.6783	60.3433	EXT4	extensin 4
AT1G76980	9	.	.	.	.	1.07574	6.45367	13.863	6.27733	7.217		patatin-like phospholipase domain protein
AT1G77500	9	.	.	.	.	1.04238	3.716	7.57967	3.767	3.84833		DUF630 family protein, putative (DUF630 and DUF632)
AT1G77510	9	.	-1.10945	.	.	1.35122	27.0387	68.5697	31.0327	31.1923	PDIL1-2	PDI-like 1-2
AT1G77660	9	.	-1.56349	.	.	1.28927	4.24367	10.3357	3.79467	3.39667		Histone H3 K4-specific methyltransferase SET7/9 family protein
AT1G78380	9	.	-1.10811	.	.	1.30144	521.362	1273.16	586.923	581.573	GSTU19	glutathione S-transferase TAU 19
AT1G78460	9	.	-1.29442	.	.	1.24202	78.408	184.241	73.6557	73.7117		SOUL heme-binding family protein
AT1G78850	9	.	-1.17865	.	.	1.1515	157.132	346.602	152.022	150.342		D-mannose binding lectin protein with Apple-like carbohydrate-binding domain-containing protein
AT1G79270	9	.	-1.06719	.	.	1.16203	9.17333	20.4483	11.029	9.55633	ECT8	evolutionarily conserved C-terminal region 8
AT2G02370	9	.	-1.27299	.	.	.	7.977	14.911	7.20733	6.22533		SNARE associated Golgi protein family
AT2G02810	9	.	-1.0863	.	.	1.17682	10.01	22.56	9.204	10.4323	UTR1	UDP-galactose transporter 1
AT2G03360	9	.	-3.51163	.	.	3.70065	0.066	0.962	0.0693333	0.0843333		Glycosyltransferase family 61 protein
AT2G04100	9	.	-1.44378	.	.	1.38887	2.02433	5.34133	2.12167	1.92033		MATE efflux family protein
AT2G07698	9	.	-1.23123	.	.	.	2.92333	5.59833	2.75367	2.29267		ATPase, F1 complex, alpha subunit protein
AT2G13790	9	.	-1.00966	.	.	1.19116	23.7197	53.7227	24.114	26.1703	SERK4	somatic embryogenesis receptor-like kinase 4
AT2G19710	9	.	-1.11371	.	.	1.02285	4.69633	9.51333	4.34067	4.28133		Regulator of Vps4 activity in the MVB pathway protein
AT2G20320	9	.	-1.31922	.	.	1.31513	3.57133	8.908	3.72867	3.48767		DENN (AEX-3) domain-containing protein
AT2G21500	9	.	-1.03112	.	.	.	10.2767	18.854	9.08267	8.96233		RING/U-box superfamily protein
AT2G21510	9	.	-1.59214	.	.	.	1.30667	3.337	1.27	1.11833		DNAJ heat shock N-terminal domain-containing protein
AT2G23150	9	.	-1.18407	.	.	1.08394	6.83233	14.3507	6.07333	6.21233	NRAMP3	natural resistance-associated macrophage protein 3
AT2G23450	9	.	-1.29214	.	.	1.0625	10.9667	23.1687	9.68867	9.16533		Protein kinase superfamily protein
AT2G24600	9	.	.	.	.	1.10361	18.374	39.3503	18.3007	16.722		Ankyrin repeat family protein
AT2G26310	9	.	-1.92396	.	.	.	0.953667	2.79433	0.961333	0.744333	FAP2	Chalcone-flavanone isomerase family protein
AT2G29110	9	.	-2.72566	.	.	.	0.725667	1.97667	0.651	0.272667	GLR2.8	glutamate receptor 2.8
AT2G29400	9	.	-1.13951	.	.	.	46.0377	77.3563	39.868	34.4727	TOPP1	type one protein phosphatase 1
AT2G30720	9	.	-1.16374	.	.	.	12.3713	22.1833	10.4317	9.668		Thioesterase/thiol ester dehydrase-isomerase superfamily protein
AT2G31060	9	.	-1.03125	.	.	1.14193	22.079	48.4903	20.409	23.2987	EMB2785	elongation factor family protein
AT2G31880	9	.	-1.12159	.	.	1.02634	62.1557	125.672	52.2073	56.6883	SOBIR1	Leucine-rich repeat protein kinase family protein
AT2G32250	9	.	-1.05857	.	.	.	5.26167	8.71733	4.575	4.19833	FRS2	FAR1-related sequence 2
AT2G34080	9	.	.	.	.	2.22345	0.421	1.96167	0.353667	0.477333		Cysteine proteinases superfamily protein
AT2G34355	9	.	-1.39234	.	.	1.44638	4.77567	12.9803	4.68567	4.85133		Major facilitator superfamily protein
AT2G34660	9	.	-1.27306	.	.	1.01227	11.4927	23.7767	10.3277	9.739	ABCC2	multidrug resistance-associated protein 2
AT2G35000	9	.	-2.25104	.	.	2.31231	0.224	1.107	0.19	0.222667	ATL9	RING/U-box superfamily protein
AT2G35480	9	.	-1.18855	.	.	1.18789	4.80333	10.817	5.35367	4.74733		envelope glycoprotein
AT2G37690	9	.	-1.14978	.	.	1.20727	8.05667	18.4717	7.78333	8.181		phosphoribosylaminoimidazole carboxylase, putative / AIR carboxylase
AT2G37940	9	.	-1.14249	.	.	1.18721	41.0977	92.434	42.0523	40.227	AtIPCS2	Inositol phosphorylceramide synthase 2
AT2G37980	9	.	-2.15496	.	.	2.03137	0.64	2.608	0.577	0.582		O-fucosyltransferase family protein
AT2G39530	9	.	-3.576	.	.	4.17897	0.0553333	1.47033	0.073	0.099		Uncharacterized protein family (UPF0497)
AT2G41880	9	.	-1.04369	.	.	1.2495	9.089	21.1893	9.24967	10.0193	GK-1	guanylate kinase 1
AT2G42350	9	.	-1.97587	.	.	.	0.902	2.322	0.457	0.582		RING/U-box superfamily protein
AT2G42560	9	.	-2.64203	.	.	.	0.469	1.30033	0.297	0.204667		late embryogenesis abundant domain-containing protein / LEA domain-containing protein
AT2G43150	9	.	-1.39537	.	.	1.25035	160.399	378.106	164.092	141.437		Proline-rich extensin-like family protein
AT2G43320	9	.	-1.08246	.	.	.	6.39633	12.1053	6.10567	5.59067		S-adenosyl-L-methionine-dependent methyltransferases superfamily protein
AT2G44070	9	.	-4.82202	.	.	3.44294	0.123667	1.312	0.0276667	0.032		NagB/RpiA/CoA transferase-like superfamily protein
AT2G44080	9	.	-1.55283	.	.	1.17968	9.20333	20.7183	8.342	6.93633	ARL	ARGOS-like protein
AT2G44370	9	.	-2.20997	.	.	.	0.562667	1.537	0.869667	0.287		Cysteine/Histidine-rich C1 domain family protein
AT2G44480	9	.	-2.07003	.	.	2.01891	0.881	3.67067	1.02367	0.877667	BGLU17	beta glucosidase 17
AT2G46140	9	.	-1.05094	.	.	.	10.8207	19.2477	8.27767	9.11167		Late embryogenesis abundant protein
AT2G46500	9	.	-1.07359	.	.	.	24.462	45.0027	20.8483	20.913	PI4K GAMMA 4	phosphoinositide 4-kinase gamma 4
AT2G47140	9	.	-2.59357	.	.	2.47539	0.411667	2.308	0.462	0.329333	SDR5	NAD(P)-binding Rossmann-fold superfamily protein
AT3G01840	9	.	-2.38052	.	.	.	0.428	1.003	0.339333	0.177	LYK2	Protein kinase superfamily protein
AT3G02040	9	.	-1.08868	.	.	.	7.07933	12.8627	6.651	5.95	SRG3	senescence-related gene 3
AT3G02140	9	.	-2.41749	.	.	.	0.838	2.186	0.527333	0.392	TMAC2	AFP2 (ABI five-binding protein 2) family protein
AT3G02150	9	.	-1.44994	.	.	1.08033	5.37633	11.3213	4.12633	4.079	PTF1	plastid transcription factor 1
AT3G02550	9	.	-1.07078	.	.	.	15.557	28.7733	12.7233	13.4943	LBD41	LOB domain-containing protein 41
AT3G03270	9	.	-1.18229	.	.	1.19397	28.6777	64.3043	25.2363	27.3987		Adenine nucleotide alpha hydrolases-like superfamily protein
AT3G04060	9	.	-1.42491	.	.	.	4.38233	8.40133	3.69033	3.02933	NAC046	NAC domain containing protein 46
AT3G04620	9	.	-1.32432	.	.	1.48435	2.081	5.934	2.442	2.31433	DAN1	Alba DNA/RNA-binding protein
AT3G04670	9	.	-1.15336	.	.	.	9.961	16.1093	8.974	7.19667	WRKY39	WRKY DNA-binding protein 39
AT3G05500	9	.	.	.	.	1.02427	25.398	51.3947	25.189	25.454		Rubber elongation factor protein (REF)
AT3G05580	9	.	-1.00538	.	.	.	5.95067	10.3013	5.92867	5.03167	TOPP9	Calcineurin-like metallo-phosphoesterase superfamily protein
AT3G05630	9	.	-1.54958	.	.	1.2453	1.62433	3.84333	1.50367	1.28833	PLDP2	phospholipase D P2
AT3G07720	9	.	.	.	.	1.06312	21.2133	44.0863	22.3923	23.229		Galactose oxidase/kelch repeat superfamily protein
AT3G08760	9	.	-1.03354	.	.	.	16.1097	26.0877	12.928	12.599	ATSIK	Protein kinase superfamily protein
AT3G09830	9	.	.	.	.	1.03538	19.554	40.6127	18.94	21.079		Protein kinase superfamily protein
AT3G10640	9	.	-1.01367	.	.	1.08506	21.2017	44.815	20.1623	21.7587	VPS60.1	SNF7 family protein
AT3G11820	9	.	-1.08706	.	.	1.14914	34.0783	76.4633	31.3563	34.6237	SYP121	syntaxin of plants 121
AT3G13100	9	.	-1.12314	.	.	1.07479	1.20133	2.71367	0.996333	1.154	ABCC7	multidrug resistance-associated protein 7
AT3G13330	9	.	-1.07472	.	.	1.09293	15.9273	33.7143	14.513	15.735	PA200	proteasome activating protein 200
AT3G13380	9	.	-1.10157	.	.	1.1503	1.98833	4.36767	2.10967	1.99433	BRL3	BRI1-like 3
AT3G13430	9	.	-1.0713	.	.	.	8.89267	14.8197	6.805	7.05067		RING/U-box superfamily protein
AT3G13600	9	.	-2.35651	.	.	1.78567	0.674667	2.25667	0.660333	0.504333		calmodulin-binding family protein
AT3G13910	9	.	-1.26237	.	.	1.33085	32.3627	80.5773	34.3173	32.3423		hypothetical protein (DUF3511)
AT3G18950	9	.	-1.13004	.	.	1.23086	3.321	7.75433	2.993	3.467		Transducin/WD40 repeat-like superfamily protein
AT3G19010	9	.	-1.03985	.	.	1.25601	78.8807	187.149	79.0883	89.42		2-oxoglutarate (2OG) and Fe(II)-dependent oxygenase superfamily protein
AT3G19260	9	.	-1.12051	.	.	1.22788	8.076	18.757	8.55567	8.49533	LOH2	LAG1 homologue 2
AT3G19970	9	.	-1.28914	.	.	1.17075	4.297	9.844	4.03933	3.87533		alpha/beta-Hydrolases superfamily protein
AT3G20410	9	.	-1.2503	.	.	1.17741	24.178	55.0633	22.552	22.2713	CPK9	calmodulin-domain protein kinase 9
AT3G20660	9	.	-1.85619	.	.	1.32108	2.05133	5.13567	1.42667	1.397	OCT4	organic cation/carnitine transporter4
AT3G21070	9	.	-1.00618	.	.	.	17.1627	27.6413	13.6653	13.4823	NADK1	NAD kinase 1
AT3G23010	9	.	-1.37817	.	.	1.62897	1.331	4.11367	1.356	1.52567	RLP36	receptor like protein 36
AT3G24170	9	.	-1.20243	.	.	1.1255	61.33	133.913	62.0027	57.7873	GR1	glutathione-disulfide reductase
AT3G25730	9	.	-1.51693	.	.	1.23976	2.49	5.85833	1.91167	1.96833	EDF3	ethylene response DNA binding factor 3
AT3G26680	9	.	-1.15234	.	.	.	2.98967	5.383	2.624	2.30667	SNM1	DNA repair metallo-beta-lactamase family protein
AT3G26820	9	.	-5.97791	.	.	3.41587	0.059	0.775	0.0483333	0.007		Esterase/lipase/thioesterase family protein
AT3G27330	9	.	-1.17421	.	.	1.0653	1.911	4.00033	1.66633	1.73233		zinc finger (C3HC4-type RING finger) family protein
AT3G28510	9	.	-1.91747	.	.	1.81287	0.680333	2.42367	0.316	0.604333		P-loop containing nucleoside triphosphate hydrolases superfamily protein
AT3G28600	9	.	-3.42653	.	.	.	0.361333	1.823	0.125333	0.166333		P-loop containing nucleoside triphosphate hydrolases superfamily protein
AT3G44190	9	.	-1.26706	.	.	1.42195	17.981	47.701	19.2823	19.5487		FAD/NAD(P)-binding oxidoreductase family protein
AT3G45040	9	.	-1.12711	.	.	.	12.199	23.6333	10.6843	10.66		phosphatidate cytidylyltransferase family protein
AT3G46280	9	.	-2.37354	.	.	2.43506	0.378	2.09767	0.342667	0.402		kinase-like protein
AT3G47540	9	.	-1.17938	.	.	1.32541	9.42967	23.8133	9.438	10.1447		Chitinase family protein
AT3G48990	9	.	-1.09621	.	.	1.06661	135.274	280.914	131.383	129.29	AAE3	AMP-dependent synthetase and ligase family protein
AT3G49210	9	.	-1.62859	.	.	1.41819	2.83233	7.56533	2.64733	2.40367		O-acyltransferase (WSD1-like) family protein
AT3G50470	9	.	-1.36267	.	.	1.15058	4.76633	10.4543	4.25533	4.009	HR3	homolog of RPW8 3
AT3G50900	9	.	-1.28083	.	.	1.27966	8.744	21.2447	9.01733	8.492		hypothetical protein
AT3G51440	9	.	-1.2543	.	.	1.33483	3.809	9.52933	3.65267	3.88833		Calcium-dependent phosphotriesterase superfamily protein
AT3G51660	9	.	-1.04302	.	.	1.19777	80.6173	183.563	78.871	87.4823		Tautomerase/MIF superfamily protein
AT3G53180	9	.	-1.1002	.	.	1.04351	26.3187	53.84	24.6163	24.6717	NodGS	nodulin/glutamine synthase-like protein
AT3G54580	9	.	-1.81153	.	.	.	0.519333	0.905	0.542	0.240333		Proline-rich extensin-like family protein
AT3G54950	9	.	-1.03234	.	.	.	5.61967	10.4453	4.64533	4.99733	pPLAIIIbeta	patatin-like protein 6
AT3G56200	9	.	-1.04882	.	.	.	19.1713	33.1753	15.5563	15.7363		Transmembrane amino acid transporter family protein
AT3G56400	9	.	.	.	.	1.01209	82.4783	165.073	62.599	94.102	WRKY70	WRKY DNA-binding protein 70
AT3G57380	9	.	-3.10122	.	.	2.27717	0.271667	1.364	0.396667	0.141333		Glycosyltransferase family 61 protein
AT3G57550	9	.	-1.12311	.	.	1.19266	13.478	31.5673	13.2427	14.159	AGK2	guanylate kinase
AT3G57760	9	.	-1.39882	.	.	1.0937	2.946	6.01333	1.96	2.34833		Protein kinase superfamily protein
AT3G61390	9	.	-3.54809	.	.	3.81195	0.0823333	1.14033	0.052	0.0993333		RING/U-box superfamily protein
AT3G61760	9	.	-1.48339	.	.	.	1.03033	2.12633	1.03567	0.724333	DL1B	DYNAMIN-like 1B
AT3G62590	9	.	-1.72521	.	.	1.30683	2.306	5.684	2.308	1.68333		alpha/beta-Hydrolases superfamily protein
AT3G63310	9	.	-1.00127	.	.	1.07023	40.8527	85.2087	41.2573	41.805	BIL4	Bax inhibitor-1 family protein
AT4G01010	9	.	-1.38347	.	.	1.54988	3.28133	9.51933	3.90433	3.567	CNGC13	cyclic nucleotide-gated channel 13
AT4G02280	9	.	-1.42525	.	.	.	2.73167	5.05233	2.21867	1.84033	SUS3	sucrose synthase 3
AT4G02390	9	.	-1.12829	.	.	1.13958	2.325	5.15833	2.25233	2.40667	PARP2	poly(ADP-ribose) polymerase
AT4G02940	9	.	-1.21479	.	.	1.21975	21.877	50.58	22.6333	21.4057		oxidoreductase, 2OG-Fe(II) oxygenase family protein
AT4G04180	9	.	-1.08955	.	.	1.14798	2.64	5.881	2.607	2.706		P-loop containing nucleoside triphosphate hydrolases superfamily protein
AT4G04500	9	.	-2.0716	.	.	2.24657	0.419	2.02433	0.725667	0.484667	CRK37	cysteine-rich RLK (RECEPTOR-like protein kinase) 37
AT4G04960	9	.	-1.1754	.	.	.	7.32033	14.17	5.96267	6.15833		Concanavalin A-like lectin protein kinase family protein
AT4G08380	9	.	-1.30746	.	.	.	5.79167	11.9287	6.01133	4.73467		Proline-rich extensin-like family protein
AT4G11000	9	.	-1.32373	.	.	1.45443	3.572	9.716	3.29267	3.821		Ankyrin repeat family protein
AT4G11170	9	.	-4.21963	.	.	5.29385	0.0393333	1.52433	0.0903333	0.0706667		Disease resistance protein (TIR-NBS-LRR class) family
AT4G11670	9	.	-1.07398	.	.	.	5.52633	10.6233	5.04167	4.99867		DNA topoisomerase 4 subunit B (DUF810)
AT4G12720	9	.	-1.13376	.	.	1.27713	48.0583	116.334	47.602	52.38	NUDT7	MutT/nudix family protein
AT4G15530	9	.	-1.17145	.	.	.	28.858	56.3107	27.4717	24.545	PPDK	pyruvate orthophosphate dikinase
AT4G16670	9	.	-1.06785	.	.	1.1616	5.205	11.92	5.303	5.33233		auxin canalization protein (DUF828)
AT4G18050	9	.	-1.17639	.	.	1.37321	1.70367	4.42	1.74233	1.927	ABCB9	P-glycoprotein 9
AT4G18205	9	.	.	.	.	1.08309	26.061	54.9027	25.1747	29.588		Nucleotide-sugar transporter family protein
AT4G18890	9	.	-1.15681	.	.	1.03109	6.96367	14.306	7.10867	6.30333	BEH3	BES1/BZR1 homolog 3
AT4G18950	9	.	-1.18025	.	.	1.04622	20.342	41.6717	17.575	18.038		Integrin-linked protein kinase family
AT4G18990	9	.	-2.85843	.	.	2.24112	0.4	1.88333	0.204333	0.247333	XTH29	xyloglucan endotransglucosylase/hydrolase 29
AT4G19460	9	.	-2.09851	.	.	.	0.539	2.101	0.451667	0.466333		UDP-Glycosyltransferase superfamily protein
AT4G19700	9	.	-1.22427	.	.	1.18853	7.97233	18.17	7.69233	7.60633	RING	SBP (S-ribonuclease binding protein) family protein
AT4G19970	9	.	-3.24248	.	.	2.36939	0.394333	2.03133	0.194	0.187667		nucleotide-diphospho-sugar transferase family protein
AT4G21400	9	.	-1.00261	.	.	1.03951	4.20067	8.53733	4.61133	4.11033	CRK28	cysteine-rich RLK (RECEPTOR-like protein kinase) 28
AT4G21534	9	.	-1.11793	.	.	.	6.12333	10.2763	4.61467	4.61967	SPHK2	Diacylglycerol kinase family protein
AT4G22505	9	.	-1.35362	.	.	.	12.0567	21.4123	11.628	8.215		Bifunctional inhibitor/lipid-transfer protein/seed storage 2S albumin superfamily protein
AT4G22780	9	.	-1.13127	.	.	.	18.2893	29.83	17.0827	13.3363	ACR7	ACT domain repeat 7
AT4G22960	9	.	-3.3336	.	.	3.47392	0.147667	1.64133	0.208	0.155333		FAM63A-like protein (DUF544)
AT4G23210	9	.	-1.47619	.	.	1.24829	2.65567	6.29067	1.77867	2.211	CRK13	cysteine-rich RLK (RECEPTOR-like protein kinase) 13
AT4G23230	9	.	-1.19809	.	.	1.52681	1.86833	5.39633	1.97267	2.27067	CRK15	cysteine-rich RECEPTOR-like kinase
AT4G23250	9	.	.	.	.	1.23236	10.3203	24.566	9.52	11.8537	EMB1290	cysteine-rich receptor-like protein kinase 17
AT4G25030	9	.	-1.11425	.	.	1.08551	80.8947	170.431	72.857	77.3093		Serine/Threonine-kinase
AT4G26060	9	.	-1.45813	.	.	1.18059	10.6967	24.107	9.37667	8.57267		Ribosomal protein L18ae family
AT4G26120	9	.	-1.36441	.	.	1.69303	1.26367	3.61267	1.159	1.41633		Ankyrin repeat family protein / BTB/POZ domain-containing protein
AT4G27070	9	.	-1.19712	.	.	1.25877	6.51067	15.547	6.15333	6.62233	TSB2	tryptophan synthase beta-subunit 2
AT4G27830	9	.	-1.03245	.	.	1.22597	23.899	57.1427	25.2237	27.2257	BGLU10	beta glucosidase 10
AT4G27940	9	.	-1.51699	.	.	1.32969	2.817	7.06567	2.735	2.37433	MTM1	manganese tracking factor for mitochondrial SOD2
AT4G29900	9	.	-1.08603	.	.	.	31.493	52.7527	26.8097	24.3953	ACA10	autoinhibited Ca(2+)-ATPase 10
AT4G30390	9	.	-1.29854	.	.	1.26728	20.4247	48.9347	18.7573	19.5567		UDP-arabinopyranose mutase
AT4G30490	9	.	-1.22218	.	.	1.22401	14.0597	32.5503	11.853	13.7337		AFG1-like ATPase family protein
AT4G31860	9	.	-1.37722	.	.	1.30344	27.4307	65.554	27.1277	24.5677		Protein phosphatase 2C family protein
AT4G33070	9	.	-1.39846	.	.	1.64459	1.53567	4.733	1.043	1.77133		Thiamine pyrophosphate dependent pyruvate decarboxylase family protein
AT4G34860	9	.	-1.47883	.	.	1.14687	1.90033	4.32667	2.07567	1.476	A/N-InvB	Plant neutral invertase family protein
AT4G37640	9	.	-1.04325	.	.	1.14809	15.7807	34.7057	16.0747	16.54	ACA2	calcium ATPase 2
AT4G37900	9	.	-1.95234	.	.	1.60899	1.18067	3.58	0.849667	0.903667		hypothetical protein (duplicated DUF1399)
AT4G39230	9	.	-1.2202	.	.	1.26591	7.12567	17.0123	6.77533	7.16033		NmrA-like negative transcriptional regulator family protein
AT5G01210	9	.	.	.	.	1.05571	21.2897	43.8457	22.612	22.006		HXXXD-type acyl-transferase family protein
AT5G01250	9	.	-2.92061	.	.	1.82085	0.508	1.81967	0.475667	0.212667		alpha 1,4-glycosyltransferase family protein
AT5G01550	9	.	-2.9001	.	.	2.30698	0.380667	1.953	0.211333	0.237	LECRKA4.2	lectin receptor kinase a4.1
AT5G01720	9	.	-1.00499	.	.	1.0782	6.989	14.6253	7.12767	7.15367		RNI-like superfamily protein
AT5G02100	9	.	-1.08059	.	.	.	6.14033	9.503	5.02767	4.83567	UNE18	Oxysterol-binding family protein
AT5G03330	9	.	.	.	.	1.02606	9.13333	18.5313	8.88967	9.57133		Cysteine proteinases superfamily protein
AT5G03490	9	.	-1.12061	.	.	1.00821	5.93433	11.919	6.714	5.348		UDP-Glycosyltransferase superfamily protein
AT5G05850	9	.	-1.06894	.	.	.	6.84667	11.5197	5.30567	5.35733	PIRL1	plant intracellular ras group-related LRR 1
AT5G07100	9	.	-1.24988	.	.	.	10.8387	19.738	8.457	8.26967	WRKY26	WRKY DNA-binding protein 26
AT5G09420	9	.	-1.47409	.	.	1.30705	4.00467	9.916	3.40267	3.46733	TOC64-V	translocon at the outer membrane of chloroplasts 64-V
AT5G09470	9	.	-2.50978	.	.	2.61073	0.332333	2.06933	0.499	0.346333	DIC3	dicarboxylate carrier 3
AT5G11520	9	.	-1.17138	.	.	1.17301	49.73	111.171	49.807	48.561	ASP3	aspartate aminotransferase 3
AT5G12010	9	.	-1.43166	.	.	1.15648	16.0097	35.3503	14.7533	12.869		nuclease
AT5G13190	9	.	-1.11138	.	.	1.08059	34.2757	71.929	28.9053	32.6483	GILP	GSH-induced LITAF domain protein
AT5G13820	9	.	-1.89209	.	.	1.49104	1.92033	5.354	1.54367	1.42967	TBP1	telomeric DNA binding protein 1
AT5G14490	9	.	-3.78144	.	.	3.47191	0.107667	1.02533	0	0.109	NAC085	NAC domain containing protein 85
AT5G14780	9	.	-1.1775	.	.	1.14506	231.178	507.292	248.857	220.766	FDH	formate dehydrogenase
AT5G15870	9	.	-1.32658	.	.	1.0739	8.40967	17.5757	8.13467	6.85933		glycosyl hydrolase family 81 protein
AT5G16080	9	.	-1.60197	.	.	1.83439	1.18267	4.17133	1.324	1.35133	CXE17	carboxyesterase 17
AT5G16170	9	.	-1.62046	.	.	1.70572	1.162	3.79567	1.73667	1.18633		Core-2/I-branching beta-1,6-N-acetylglucosaminyltransferase family protein
AT5G16930	9	.	-1.11856	.	.	1.1589	5.303	11.786	4.82733	5.28967		AAA-type ATPase family protein
AT5G17990	9	.	-1.07258	.	.	1.03848	55.4383	113.078	50.9113	52.8063	TRP1	tryptophan biosynthesis 1
AT5G18170	9	.	-1.02115	.	.	.	58.3023	92.4077	47.3493	44.6883	GDH1	glutamate dehydrogenase 1
AT5G18400	9	.	-1.1127	.	.	1.15151	39.8647	89.3827	40.956	40.005		Cytokine-induced anti-apoptosis inhibitor 1, Fe-S biogenesi
AT5G18490	9	.	-1.39115	.	.	1.2783	9.47167	22.799	8.518	8.50967		vacuolar sorting-associated protein (DUF946)
AT5G19550	9	.	-1.07995	.	.	1.18813	56.0307	126.662	57.489	58.8943	ASP2	aspartate aminotransferase 2
AT5G20830	9	.	-1.3318	.	.	1.12937	40.2223	87.991	35.8973	34.574	SUS1	sucrose synthase 1
AT5G20940	9	.	-1.75536	.	.	1.71913	0.673	2.25967	0.694667	0.655667		Glycosyl hydrolase family protein
AT5G22250	9	.	.	.	.	1.01589	14.1573	28.5353	10.0227	14.002	CAF1b	Polynucleotidyl transferase, ribonuclease H-like superfamily protein
AT5G23850	9	.	-1.219	.	.	1.04918	11.022	22.66	8.98033	9.55133		O-glucosyltransferase rumi-like protein (DUF821)
AT5G24810	9	.	-1.04888	.	.	.	15.3663	29.3377	14.4977	13.9187		ABC1 family protein
AT5G25910	9	.	-2.69024	.	.	2.18047	0.315	1.46033	0.110667	0.218667	RLP52	receptor like protein 52
AT5G26030	9	.	-1.18987	.	.	1.10569	42.273	90.474	38.0257	38.9587	FC1	ferrochelatase 1
AT5G26860	9	.	-1.20267	.	.	1.32615	10.305	25.6727	10.3017	10.9447	LON1	lon protease 1
AT5G27610	9	.	-1.36131	.	.	1.07413	1.95467	4.085	1.57133	1.56667	ALY1	protein ALWAYS EARLY 1
AT5G35690	9	.	-1.13777	.	.	1.01899	23.09	46.422	22.433	20.7403		zinc metalloproteinase-like protein
AT5G36925	9	.	-1.57584	.	.	.	2.703	6.95233	2.66467	2.19933		hypothetical protein
AT5G40010	9	.	-2.83777	.	.	2.54944	0.223667	1.333	0.153	0.176333	AATP1	AAA-ATPase 1
AT5G40780	9	.	-1.07262	.	.	1.33057	20.7017	51.5967	22.4047	24.0097	LHT1	lysine histidine transporter 1
AT5G41610	9	.	-1.18341	.	.	1.19768	2.40633	5.51033	2.16367	2.33567	CHX18	cation/H+ exchanger 18
AT5G44380	9	.	-1.29933	.	.	.	0.984667	2.01533	1.12867	0.791333		FAD-binding Berberine family protein
AT5G46910	9	.	-1.08193	.	.	.	3.09033	4.88333	2.23767	2.28267		Transcription factor jumonji (jmj) family protein / zinc finger (C5HC2 type) family protein
AT5G47220	9	.	-1.2084	.	.	1.21187	40.6477	93.504	37.3823	39.609	ERF2	ethylene responsive element binding factor 2
AT5G47730	9	.	-1.27226	.	.	1.13064	15.4307	32.757	13.415	13.3237		Sec14p-like phosphatidylinositol transfer family protein
AT5G47850	9	.	-2.20899	.	.	1.55736	0.476667	1.43667	0.286667	0.286333	CCR4	CRINKLY4 related 4
AT5G48380	9	.	-1.14399	.	.	.	35.3283	69.6983	30.007	30.94	BIR1	BAK1-interacting receptor-like kinase 1
AT5G48400	9	.	-4.13467	.	.	2.69049	0.26	1.64467	0.190667	0.0816667	ATGLR1.2	Glutamate receptor family protein
AT5G48410	9	.	-3.56907	.	.	2.79586	0.264333	1.891	0.155333	0.148333	GLR1.3	glutamate receptor 1.3
AT5G48530	9	.	-1.27261	.	.	1.10829	3.63067	7.829	3.563	3.16967		hypothetical protein
AT5G50570	9	.	.	.	.	1.0259	8.08833	16.9343	6.411	6.97867	SPL13A	Squamosa promoter-binding protein-like (SBP domain) transcription factor family protein
AT5G53110	9	.	-1.87441	.	.	1.61507	1.391	4.24333	1.10867	1.12033		RING/U-box superfamily protein
AT5G53120	9	.	-1.18081	.	.	1.09262	44.588	96.7813	40.191	41.74	SPDS3	spermidine synthase 3
AT5G53970	9	.	-1.42099	.	.	1.46122	10.4987	28.63	12.1067	10.5293	TAT7	Tyrosine transaminase family protein
AT5G54720	9	.	-1.4425	.	.	1.27966	4.947	11.9473	3.946	4.23633		Ankyrin repeat family protein
AT5G55150	9	.	-7.3681	.	.	3.8966	0.0726667	1.06133	0.0483333	0		F-box SKIP23-like protein (DUF295)
AT5G55200	9	.	-1.24872	.	.	1.38967	11.3647	29.6863	13.101	12.2003	MGE1	Co-chaperone GrpE family protein
AT5G56090	9	.	-1.07558	.	.	.	7.05933	13.7273	6.214	6.38467	COX15	cytochrome c oxidase 15
AT5G57035	9	.	-1.02029	.	.	.	10.6343	18.729	9.40967	9.03733		U-box domain-containing protein kinase family protein
AT5G58120	9	.	-1.11436	.	.	.	3.003	5.775	2.47833	2.59033		Disease resistance protein (TIR-NBS-LRR class) family
AT5G58210	9	.	.	.	.	1.11997	4.61567	10.198	4.16767	5.25367		hydroxyproline-rich glycoprotein family protein
AT5G58390	9	.	-1.19708	.	.	1.09364	15.075	32.01	15.478	13.67		Peroxidase superfamily protein
AT5G61210	9	.	.	.	.	1.02573	50.1403	101.187	44.8723	49.756	SNAP33	soluble N-ethylmaleimide-sensitive factor adaptor protein 33
AT5G62620	9	.	-1.20803	.	.	.	5.27733	10.5073	5.71233	4.451		Galactosyltransferase family protein
AT5G62865	9	.	-1.30582	.	.	.	8.449	15.5107	8.26833	6.064		hypothetical protein
AT5G63010	9	.	-1.19334	.	.	.	6.604	12.0097	5.59933	5.16833		Transducin/WD40 repeat-like superfamily protein
AT5G64110	9	.	-1.04602	.	.	1.30502	8.386	20.6263	8.879	9.75233		Peroxidase superfamily protein
AT5G64310	9	.	-1.04703	.	.	1.09882	41.7263	88.6877	38.2583	42.0867	AGP1	arabinogalactan protein 1
AT5G66210	9	.	-1.01026	.	.	.	30.623	51.1907	26.8733	24.1733	CPK28	calcium-dependent protein kinase 28
AT5G66480	9	.	-1.57459	.	.	1.38485	1.85267	4.85467	1.356	1.55467		bacteriophage N4 adsorption B protein
AT5G66640	9	.	-1.01787	.	.	.	4.319	8.15033	4.58533	3.92033	DAR3	DA1-related protein 3
AT1G01720	10	.	-2.04505	.	.	1.68632	13.5117	43.064	10.782	10.238	ATAF1	NAC (No Apical Meristem) domain transcriptional regulator superfamily protein
AT1G02400	10	.	-1.78888	.	.	1.37033	7.18433	18.4763	5.67133	5.17867	GA2OX6	gibberellin 2-oxidase 6
AT1G02470	10	.	-2.12092	.	.	1.3787	2.484	7.224	1.92	1.604		Polyketide cyclase/dehydrase and lipid transport superfamily protein
AT1G05010	10	.	-1.3093	.	.	1.40408	182.99	480.414	182.111	190.597	EFE	ethylene-forming enzyme
AT1G05100	10	.	-2.99432	.	.	2.29264	1.18267	5.73433	0.920667	0.685667	MAPKKK18	mitogen-activated protein kinase kinase kinase 18
AT1G07000	10	.	-1.47427	.	.	1.53823	14.321	41.3133	13.84	14.5493	EXO70B2	exocyst subunit exo70 family protein B2
AT1G07260	10	.	-2.08929	.	.	2.00231	2.13967	8.47333	2.02933	1.94533	UGT71C3	UDP-glucosyl transferase 71C3
AT1G08940	10	.	-1.62568	.	.	1.75288	6.65367	22.3433	5.97167	7.041		Phosphoglycerate mutase family protein
AT1G09480	10	.	-2.2572	.	.	2.19514	1.56233	7.13	1.67433	1.50133		NAD(P)-binding Rossmann-fold superfamily protein
AT1G09560	10	.	-1.77084	.	.	1.80025	31.204	107.962	30.9637	31.0793	GLP5	germin-like protein 5
AT1G09932	10	.	-1.64678	.	.	1.78338	6.744	23.0453	6.995	7.11567		Phosphoglycerate mutase family protein
AT1G10170	10	.	-1.50846	.	.	1.31625	15.1943	38.224	14.092	13.116	NFXL1	NF-X-like 1
AT1G10340	10	.	-1.83918	.	.	1.85011	2.34967	8.67667	2.35433	2.32633		Ankyrin repeat family protein
AT1G14540	10	.	-2.74641	.	.	3.04621	0.270333	2.3	0.388333	0.307667	PER4	Peroxidase superfamily protein
AT1G15430	10	.	-1.6408	.	.	1.59658	7.60833	22.8383	6.42867	7.20333		hypothetical protein (DUF1644)
AT1G17147	10	.	-1.90104	.	.	1.73719	8.61933	28.625	8.18033	7.389		VQ motif-containing protein
AT1G18020	10	.	-1.37171	.	.	1.28746	23.1563	56.2383	19.994	21.2453		FMN-linked oxidoreductases superfamily protein
AT1G18570	10	.	-1.56805	.	.	1.7667	9.84933	33.333	8.14133	10.9563	MYB51	myb domain protein 51
AT1G20310	10	.	-2.46393	.	.	1.88779	1.24267	4.579	0.609333	0.768667		syringolide-induced protein
AT1G23090	10	.	-1.45834	.	.	1.42445	10.7193	28.6217	9.689	10.1817	AST91	sulfate transporter 91
AT1G24095	10	.	-1.75835	.	.	1.86137	2.169	7.839	1.61433	2.478		Putative thiol-disulfide oxidoreductase DCC
AT1G24140	10	.	-1.66913	.	.	1.57126	6.73133	19.868	5.00767	6.06833		Matrixin family protein
AT1G26255	10	.	-1.78842	.	.	1.43985	13.9367	37.4763	13.7247	10.629		hypothetical protein
AT1G29290	10	.	-3.42802	.	.	2.40711	0.778333	4.12867	0.454	0.347		B-cell lymphoma 6 protein
AT1G31280	10	.	-1.55938	.	.	1.53632	6.30767	18.1587	6.16	6.05267	AGO2	Argonaute family protein
AT1G32950	10	.	-4.01152	.	.	3.29432	0.339	3.28933	0.149667	0.197667		Subtilase family protein
AT1G42980	10	.	-3.56308	.	.	3.19415	0.266	2.45333	0.107	0.17		Actin-binding FH2 (formin homology 2) family protein
AT1G42990	10	.	-1.30255	.	.	1.40865	57.4613	151.334	54.2357	60.2327	BZIP60	basic region/leucine zipper motif 60
AT1G43910	10	.	-2.20721	.	.	1.64077	3.77067	11.6947	3.03	2.435		P-loop containing nucleoside triphosphate hydrolases superfamily protein
AT1G44130	10	.	-4.21013	.	.	3.87815	0.161333	2.47033	0.139	0.113		Eukaryotic aspartyl protease family protein
AT1G45145	10	.	-1.38774	.	.	.	99.9467	214.452	68.8003	80.6543	TRX5	thioredoxin H-type 5
AT1G48000	10	.	-1.91745	.	.	.	4.487	10.8453	2.85933	2.804	MYB112	myb domain protein 112
AT1G49000	10	.	-2.67498	.	.	1.65245	1.29167	4.12333	1.193	0.607333		transmembrane protein
AT1G52560	10	.	-3.25301	.	.	3.61357	0.178333	2.30267	0.076	0.253667		HSP20-like chaperones superfamily protein
AT1G53980	10	.	-5.18831	.	.	7.93744	0	2.427	0.212667	0.0426667		Ubiquitin-like superfamily protein
AT1G54575	10	.	-1.69301	.	.	.	35.899	87.393	26.4653	27.4217		hypothetical protein
AT1G56250	10	.	-2.91616	.	.	2.40069	0.423667	2.265	0.141667	0.262	PP2-B14	phloem protein 2-B14
AT1G57650	10	.	-5.64521	.	.	5.67595	0.0523333	2.258	0.076	0.039		ATP binding protein
AT1G60740	10	.	-4.77786	.	.	7.54351	0	1.833	0	0.0603333		Thioredoxin superfamily protein
AT1G61360	10	.	-1.93508	.	.	1.91577	4.11267	15.93	3.65533	3.99367		S-locus lectin protein kinase family protein
AT1G61370	10	.	-2.15213	.	.	1.70441	1.30867	4.31567	1.04433	0.946333		S-locus lectin protein kinase family protein
AT1G61560	10	.	-1.9959	.	.	1.80538	2.35233	7.636	1.804	1.96367	MLO6	Seven transmembrane MLO family protein
AT1G61810	10	.	-2.4372	.	.	2.03405	1.51033	6.19867	0.780667	1.18333	BGLU45	beta-glucosidase 45
AT1G62420	10	.	-3.99269	.	.	2.55043	0.549	3.301	0.277667	0.194333		DUF506 family protein (DUF506)
AT1G63840	10	.	-1.84814	.	.	1.62356	7.95433	24.404	8.096	6.597		RING/U-box superfamily protein
AT1G64610	10	.	-1.65806	.	.	1.48269	4.22767	11.721	3.49167	3.64667		Transducin/WD40 repeat-like superfamily protein
AT1G65690	10	.	-1.7431	.	.	2.03544	5.51267	22.5017	6.20233	6.56633		Late embryogenesis abundant (LEA) hydroxyproline-rich glycoprotein family
AT1G66465	10	.	-1.79173	.	.	1.63803	2.20367	6.87267	1.96933	1.83667		transmembrane protein
AT1G66500	10	.	-1.46114	.	.	1.1578	6.75333	14.961	4.77667	5.275		Pre-mRNA cleavage complex II
AT1G66580	10	.	-1.54491	.	.	1.74335	134.751	447.45	137.984	150.876	SAG24	senescence associated gene 24
AT1G68390	10	.	-2.44864	.	.	2.19713	0.812333	3.665	1.12967	0.673333		Core-2/I-branching beta-1,6-N-acetylglucosaminyltransferase family protein
AT1G69480	10	.	-2.89883	.	.	.	1.04533	3.70667	0.699667	0.487667		EXS (ERD1/XPR1/SYG1) family protein
AT1G69790	10	.	-2.2476	.	.	1.66913	1.798	6.01967	1.42233	1.22167		Protein kinase superfamily protein
AT1G69920	10	.	-2.92992	.	.	3.54667	0.211667	2.473	0.24	0.358667	GSTU12	glutathione S-transferase TAU 12
AT1G71100	10	.	-1.25654	.	.	1.41374	13.277	35.174	11.4993	14.3927	RSW10	Ribose 5-phosphate isomerase, type A protein
AT1G72120	10	.	-1.7997	.	.	1.71813	2.922	9.53267	2.66233	2.68		Major facilitator superfamily protein
AT1G72330	10	.	-1.67509	.	.	1.83051	8.08167	28.7513	7.106	8.80267	ALAAT2	alanine aminotransferase 2
AT1G72680	10	.	-1.90934	.	.	1.825	15.2853	53.7613	15.149	14.0437	CAD1	cinnamyl-alcohol dehydrogenase
AT1G72770	10	.	-1.76013	.	.	1.54211	8.037	23.2617	7.96133	6.70233	HAB1	HYPERSENSITIVE TO ABA1
AT1G73805	10	.	-1.30806	.	.	1.47527	10.006	27.6087	7.815	10.8973	SARD1	Calmodulin binding protein-like protein
AT1G74020	10	.	-1.4944	.	.	1.51713	10.231	29.0493	9.28	10.1203	SS2	strictosidine synthase 2
AT1G74080	10	.	-4.16607	.	.	4.36505	0.131333	2.82067	0.149	0.151667	MYB122	myb domain protein 122
AT1G75040	10	.	-1.64368	.	.	1.76158	64.359	216.412	88.9073	68.0947	PR5	pathogenesis-related protein 5
AT1G76690	10	.	-1.67671	.	.	1.60052	4.88133	14.7167	3.94833	4.504	OPR2	12-oxophytodienoate reductase 2
AT1G76970	10	.	-1.84168	.	.	1.66852	10.1217	34.1827	9.49967	8.869		Target of Myb protein 1
AT1G77380	10	.	-2.23714	.	.	2.34629	0.757667	3.84933	1.02233	0.781	AAP3	amino acid permease 3
AT2G01180	10	.	-1.39732	.	.	1.23849	16.3707	39.6467	12.0703	15.1183	PAP1	phosphatidic acid phosphatase 1
AT2G02390	10	.	-1.37313	.	.	1.39932	36.248	95.4337	35.376	38.0027	GSTZ1	glutathione S-transferase zeta 1
AT2G02930	10	.	-2.42309	.	.	2.58255	0.827667	5.082	0.647667	0.965667	GSTF3	glutathione S-transferase F3
AT2G04160	10	.	-1.73575	.	.	1.55271	11.78	34.2737	10.014	10.1167	AIR3	Subtilisin-like serine endopeptidase family protein
AT2G04495	10	.	-1.73806	.	.	2.07393	2.83367	12.1133	3.20467	3.46833		transmembrane protein
AT2G14290	10	.	.	.	.	2.32382	0.707333	3.48867	0.387333	0.637333		LL-diaminopimelate protein (DUF295)
AT2G16060	10	.	-1.61761	.	.	1.79333	8.831	30.337	8.65567	9.72967	HB1	hemoglobin 1
AT2G16586	10	.	-1.7471	.	.	1.59143	72.058	215.199	64.0057	63.0463		transmembrane protein
AT2G18190	10	.	-4.64525	.	.	9.46288	0	2.345	0.0906667	0.0813333		P-loop containing nucleoside triphosphate hydrolases superfamily protein
AT2G19190	10	.	-2.63913	.	.	2.55009	0.701	4.177	0.610333	0.656667	FRK1	FLG22-induced receptor-like kinase 1
AT2G20142	10	.	-1.42247	.	.	1.4933	6.91567	19.4393	6.07833	6.99067		Toll-Interleukin-Resistance (TIR) domain family protein
AT2G20800	10	.	-5.62613	.	.	4.82122	0.076	2.13867	0.104667	0.0356667	NDB4	NAD(P)H dehydrogenase B4
AT2G22860	10	.	-1.79874	.	.	.	14.6717	32.986	11.1987	9.21833	PSK2	phytosulfokine 2 precursor
AT2G24100	10	.	-1.43552	.	.	1.55885	4.484	13.117	3.52067	4.79067	ASG1	ATP-dependent DNA helicase
AT2G24180	10	.	-1.36551	.	.	1.42423	31.7087	84.453	33.635	32.224	CYP71B6	cytochrome p450 71b6
AT2G26650	10	.	-1.73826	.	.	1.54575	4.21867	12.1693	3.58567	3.53967	KT1	K+ transporter 1
AT2G27660	10	.	-2.04093	.	.	2.28236	0.949	4.65133	0.817	1.08167		Cysteine/Histidine-rich C1 domain family protein
AT2G28085	10	.	.	.	.	2.14526	0.897667	4.09267	0.676333	0.999333		SAUR-like auxin-responsive protein family
AT2G29990	10	.	-1.53041	.	.	1.71005	8.83733	28.7477	8.97167	9.77133	NDA2	alternative NAD(P)H dehydrogenase 2
AT2G30400	10	.	-3.56979	.	.	2.11567	0.615667	2.63467	0.427	0.191333	OFP2	ovate family protein 2
AT2G30550	10	.	-1.60593	.	.	1.54317	17.3543	49.647	15.3713	16.149		alpha/beta-Hydrolases superfamily protein
AT2G32140	10	.	-2.0069	.	.	1.85684	3.02533	10.868	2.18967	2.60433		transmembrane receptor
AT2G32240	10	.	-1.4524	.	.	1.30096	34.919	85.4123	29.9277	30.6617		early endosome antigen
AT2G33590	10	.	-1.38977	.	.	1.43724	18.994	51.026	20.38	19.119	CRL1	NAD(P)-binding Rossmann-fold superfamily protein
AT2G36790	10	.	-1.99306	.	.	1.59841	3.54533	10.603	2.616	2.58033	UGT73C6	UDP-glucosyl transferase 73C6
AT2G37040	10	.	-1.69046	.	.	1.23081	36.35	84.489	26.3623	25.769	PAL1	PHE ammonia lyase 1
AT2G38290	10	.	-1.58719	.	.	1.81744	19.509	68.2283	20.5397	22.25	AMT2	ammonium transporter 2
AT2G39210	10	.	-1.57345	.	.	1.83512	9.25667	32.7413	8.32133	10.8077		Major facilitator superfamily protein
AT2G39650	10	.	-1.37682	.	.	1.23452	7.48633	17.5557	5.25	6.64367		cruciferin (DUF506)
AT2G39660	10	.	-1.49251	.	.	1.18444	11.433	25.8047	9.04267	8.98	BIK1	botrytis-induced kinase1
AT2G40113	10	.	-4.93406	.	.	4.3474	0.120333	2.84433	0.16	0.0743333		Pollen Ole e 1 allergen and extensin family protein
AT2G41835	10	.	-1.66949	.	.	1.8495	4.05067	14.5143	3.64167	4.436		zinc finger (C2H2 type, AN1-like) family protein
AT2G43870	10	.	-2.4973	.	.	2.89883	0.491667	3.717	0.857	0.652333		Pectin lyase-like superfamily protein
AT2G44010	10	.	-3.04226	.	.	2.40975	0.41	2.31767	0.132333	0.23		hypothetical protein
AT2G45210	10	.	-2.07061	.	.	1.59132	2.17033	6.56367	2.06867	1.51733	SAUR36	SAUR-like auxin-responsive protein family
AT2G46400	10	.	-1.63606	.	.	1.91219	5.864	21.9813	5.979	6.87533	WRKY46	WRKY DNA-binding protein 46
AT2G47730	10	.	-1.33914	.	.	1.38887	123.65	321.03	119.324	124.75	GSTF8	glutathione S-transferase phi 8
AT2G47800	10	.	-1.77567	.	.	1.62371	2.83	8.641	2.27567	2.49067	ABCC4	multidrug resistance-associated protein 4
AT3G01650	10	.	-1.79325	.	.	1.49944	8.61167	23.8663	7.621	6.894	RGLG1	RING domain ligase1
AT3G04010	10	.	-2.0761	.	.	1.63508	2.66933	8.20933	2.17833	1.88733		O-Glycosyl hydrolases family 17 protein
AT3G05360	10	.	-2.08025	.	.	2.24328	0.91	4.28433	0.807667	1.00867	RLP30	receptor like protein 30
AT3G06490	10	.	-2.85394	.	.	1.92225	0.745333	2.78933	0.363667	0.384667	MYB108	myb domain protein 108
AT3G07970	10	.	-3.36191	.	.	.	0.608333	2.90167	0.138	0.265	QRT2	Pectin lyase-like superfamily protein
AT3G08720	10	.	-1.41707	.	.	1.50835	6.39967	18.4733	5.63333	6.65967	S6K2	serine/threonine protein kinase 2
AT3G10815	10	.	-2.87891	.	.	1.9424	0.916667	3.47267	0.701333	0.445667		RING/U-box superfamily protein
AT3G12510	10	.	-2.21785	.	.	.	3.47767	9.12533	3.267	1.877		MADS-box family protein
AT3G12740	10	.	-1.57545	.	.	1.52785	36.123	103.345	32.631	34.0677	ALIS1	ALA-interacting subunit 1
AT3G14680	10	.	-1.98635	.	.	2.19706	0.860667	3.967	0.743	0.961	CYP72A14	cytochrome P450, family 72, subfamily A, polypeptide 14
AT3G15352	10	.	-1.30319	.	.	1.39833	14.58	39.749	14.883	15.3023	COX17	cytochrome c oxidase 17
AT3G15357	10	.	.	.	.	1.99384	1.41933	5.67067	0.836	1.61067		phosphopantothenoylcysteine decarboxylase subunit
AT3G16330	10	.	-1.95345	.	.	2.12467	1.50533	6.48167	1.35733	1.64733		Avr9/Cf-9 rapidly elicited protein
AT3G18830	10	.	-1.41067	.	.	1.24753	35.6323	83.9427	32.0577	31.02	PMT5	polyol/monosaccharide transporter 5
AT3G22160	10	.	-1.61798	.	.	1.48942	7.92133	22.104	5.77067	6.997		VQ motif-containing protein
AT3G22240	10	.	-1.96192	.	.	.	2.913	10.1917	3.06767	2.53		cysteine-rich/transmembrane domain PCC1-like protein
AT3G26470	10	.	-2.22414	.	.	2.37447	0.665667	3.55133	0.708	0.734667		Powdery mildew resistance protein, RPW8 domain-containing protein
AT3G26690	10	.	-1.81402	.	.	.	5.56233	13.4777	5.37	3.798	NUDX13	nudix hydrolase homolog 13
AT3G26840	10	.	-1.82296	.	.	1.45218	11.8787	32.223	8.74333	8.94867	PES2	Esterase/lipase/thioesterase family protein
AT3G44720	10	.	-1.588	.	.	1.45215	17.3593	47.1033	15.4097	15.3633	ADT4	arogenate dehydratase 4
AT3G45730	10	.	-1.99692	.	.	1.51134	17.7623	50.1577	15.8873	12.2677		hypothetical protein
AT3G46110	10	.	-1.3484	.	.	1.44094	4.60533	12.3137	4.04	4.755		UPSTREAM OF FLC-like protein (DUF966)
AT3G46690	10	.	-4.82727	.	.	2.81546	0.442667	3.19567	0.277333	0.092		UDP-Glycosyltransferase superfamily protein
AT3G46930	10	.	-1.68234	.	.	1.60761	3.21333	10.0377	2.92933	3.145		Protein kinase superfamily protein
AT3G48580	10	.	-2.27666	.	.	2.23174	0.636	2.931	0.456667	0.624	XTH11	xyloglucan endotransglucosylase/hydrolase 11
AT3G49120	10	.	-1.55955	.	.	1.25678	363.053	860.22	284.448	287.125	PRXCB	peroxidase CB
AT3G49130	10	.	-3.33127	.	.	2.52774	0.501	2.91333	0.420333	0.289		SWAP (Suppressor-of-White-APricot)/surp RNA-binding domain-containing protein
AT3G50910	10	.	-1.82852	.	.	1.5903	7.665	22.9287	6.555	6.31733		netrin receptor DCC
AT3G53810	10	.	-1.44599	.	.	1.26544	6.37333	15.2067	4.857	5.44467		Concanavalin A-like lectin protein kinase family protein
AT3G55470	10	.	-1.42869	.	.	1.65078	18.331	57.9127	20.0393	21.0033		Calcium-dependent lipid-binding (CaLB domain) family protein
AT3G55950	10	.	-1.86046	.	.	1.96113	1.54867	6.02767	1.65133	1.59767	CCR3	CRINKLY4 related 3
AT3G57460	10	.	-2.34796	.	.	1.97351	2.43367	9.417	1.68733	1.79067		catalytic/ metal ion binding / metalloendopeptidase/ zinc ion binding protein
AT3G60120	10	.	-5.21551	.	.	3.69455	0.176	2.266	0.0243333	0.0533333	BGLU27	beta glucosidase 27
AT3G61630	10	.	-1.53723	.	.	1.75597	9.224	30.8293	9.61067	10.4423	CRF6	cytokinin response factor 6
AT3G62260	10	.	-1.49534	.	.	1.48395	6.62333	18.2053	5.328	6.36067		Protein phosphatase 2C family protein
AT4G00700	10	.	-2.14696	.	.	2.12794	0.728	3.19167	0.592333	0.733667		C2 calcium/lipid-binding plant phosphoribosyltransferase family protein
AT4G10960	10	.	-1.8446	.	.	1.60615	4.52967	13.7143	4.184	3.71933	UGE5	UDP-D-glucose/UDP-D-galactose 4-epimerase 5
AT4G12120	10	.	-1.58385	.	.	1.57481	5.54933	16.4533	5.11467	5.40767	SEC1B	Sec1/munc18-like (SM) proteins superfamily
AT4G14370	10	.	-2.47608	.	.	1.87868	1.47167	5.32733	1.03633	0.923667		Disease resistance protein (TIR-NBS-LRR class) family
AT4G14450	10	.	-2.85972	.	.	2.26114	0.636667	3.329	0.991333	0.385667		hypothetical protein
AT4G15270	10	.	-3.18914	.	.	3.69353	0.216	2.88233	0.437	0.272667		glucosyltransferase-like protein
AT4G15280	10	.	-3.14102	.	.	2.26077	0.691	3.379	0.493	0.374	UGT71B5	UDP-glucosyl transferase 71B5
AT4G15420	10	.	-1.5393	.	.	1.31812	9.01967	22.4043	8.09333	7.602		Ubiquitin fusion degradation UFD1 family protein
AT4G16680	10	.	-2.74775	.	.	2.39915	0.83	4.301	0.686667	0.607333		P-loop containing nucleoside triphosphate hydrolases superfamily protein
AT4G16690	10	.	-2.08719	.	.	1.51375	4.981	14.1757	3.42067	3.27267	MES16	methyl esterase 16
AT4G16760	10	.	-1.75925	.	.	1.39808	65.654	171.549	53.6013	49.782	ACX1	acyl-CoA oxidase 1
AT4G18880	10	.	-1.58256	.	.	1.51774	16.4847	46.93	12.968	15.352	HSF A4A	heat shock transcription factor A4A
AT4G20110	10	.	-1.47502	.	.	1.43113	6.51967	17.456	5.747	6.18667	VSR7	VACUOLAR SORTING RECEPTOR 7
AT4G21840	10	.	-2.38729	.	.	2.08651	1.42967	6.05567	1.053	1.12267	MSRB8	methionine sulfoxide reductase B8
AT4G22070	10	.	-4.10602	.	.	4.14254	0.137	2.291	0.0763333	0.124	WRKY31	WRKY DNA-binding protein 31
AT4G23140	10	.	-1.43181	.	.	1.58694	7.183	21.5417	7.45533	7.77533	CRK6	cysteine-rich RLK (RECEPTOR-like protein kinase) 6
AT4G23220	10	.	-1.43743	.	.	1.51402	9.24033	26.2137	8.04533	9.48	CRK14	cysteine-rich RECEPTOR-like kinase
AT4G24160	10	.	-1.40744	.	.	1.52661	17.4583	50.0623	16.5583	18.4933		alpha/beta-Hydrolases superfamily protein
AT4G24350	10	.	-1.45729	.	.	1.31437	95.374	232.477	76.809	81.1737		Phosphorylase superfamily protein
AT4G25070	10	.	-2.65037	.	.	2.91486	0.575333	4.33167	0.541333	0.664667		caldesmon-like protein
AT4G25390	10	.	-1.88305	.	.	1.83292	4.917	16.908	4.371	4.482		Protein kinase superfamily protein
AT4G26270	10	.	-1.42376	.	.	1.48995	13.263	36.9743	13.2713	13.5427	PFK3	phosphofructokinase 3
AT4G26470	10	.	-2.35067	.	.	2.02171	1.024	4.306	1.17233	0.866		Calcium-binding EF-hand family protein
AT4G29850	10	.	-1.81789	.	.	1.6246	2.43967	7.65233	2.37133	2.05667		transmembrane protein (DUF872)
AT4G31970	10	.	-5.07331	.	.	3.89675	0.140667	2.37267	0.267667	0.0566667	CYP82C2	cytochrome P450, family 82, subfamily C, polypeptide 2
AT4G33930	10	.	-3.76594	.	.	3.84674	0.227333	3.05467	0.201	0.194667		Cupredoxin superfamily protein
AT4G34150	10	.	-1.37569	.	.	1.24394	79.435	186.624	63.434	70.6187		Calcium-dependent lipid-binding (CaLB domain) family protein
AT4G34200	10	.	-1.51483	.	.	1.53138	75.6177	216.874	76.137	74.588	EDA9	D-3-phosphoglycerate dehydrogenase
AT4G34230	10	.	-1.26522	.	.	1.28212	39.889	93.108	33.8197	39.7277	CAD5	cinnamyl alcohol dehydrogenase 5
AT4G35110	10	.	-1.78787	.	.	1.28026	4.593	11.344	3.49033	3.18933		phospholipase-like protein (PEARLI 4) family protein
AT4G35630	10	.	-1.44952	.	.	1.63886	58.3107	180.178	58.4757	64.7873	PSAT	phosphoserine aminotransferase
AT4G37030	10	.	-2.97007	.	.	2.9643	0.416	3.21967	0.368333	0.415667		membrane protein
AT4G37390	10	.	-2.77102	.	.	1.93934	1.557	5.92633	1.066	0.843667	BRU6	Auxin-responsive GH3 family protein
AT4G37530	10	.	-1.92043	.	.	1.49823	9.02	24.818	7.19867	6.52633		Peroxidase superfamily protein
AT4G39030	10	.	-1.86263	.	.	1.77984	6.237	21.2657	5.59367	5.69467	EDS5	MATE efflux family protein
AT4G39580	10	.	-2.45535	.	.	1.91353	1.98567	7.53267	1.44033	1.29067		Galactose oxidase/kelch repeat superfamily protein
AT4G39610	10	.	-5.89162	.	.	5.31073	0.049	2.136	0.0556667	0.0246667		MIZU-KUSSEI-like protein (Protein of unknown function, DUF617)
AT4G39830	10	.	-1.98208	.	.	2.14822	2.41433	10.82	2.617	2.64833		Cupredoxin superfamily protein
AT4G39890	10	.	-1.30363	.	.	1.50219	5.14567	14.5523	4.77867	5.74333	RABH1c	RAB GTPase homolog H1C
AT4G39950	10	.	-1.57175	.	.	1.46869	40.1543	110.278	35.1563	36.583	CYP79B2	cytochrome P450, family 79, subfamily B, polypeptide 2
AT5G01100	10	.	-1.75321	.	.	1.39716	5.14133	13.4443	3.8	3.885	FRB1	O-fucosyltransferase family protein
AT5G01340	10	.	-1.84216	.	.	1.55538	4.76467	13.873	4.54267	3.80833	mSFC1	Mitochondrial substrate carrier family protein
AT5G03610	10	.	-1.55658	.	.	1.2828	13.4287	32.474	12.6903	10.8577		GDSL-like Lipase/Acylhydrolase superfamily protein
AT5G10520	10	.	-2.48456	.	.	2.1161	2.131	9.032	1.83433	1.462	RBK1	ROP binding protein kinases 1
AT5G11210	10	.	-4.06489	.	.	3.62781	0.143333	1.86467	0.218667	0.113333	GLR2.5	glutamate receptor 2.5
AT5G12880	10	.	-2.33852	.	.	.	0.810667	3.95633	0.624333	0.665667		proline-rich family protein
AT5G13750	10	.	-1.54754	.	.	1.64192	10.0447	31.6977	10.8683	10.978	ZIFL1	zinc induced facilitator-like 1
AT5G17330	10	.	-2.39253	.	.	2.4837	0.624	3.51333	0.483	0.653	GAD	glutamate decarboxylase
AT5G17860	10	.	-1.99604	.	.	2.09722	2.98667	12.503	3.41233	3.257	CAX7	calcium exchanger 7
AT5G19440	10	.	-1.40525	.	.	1.42417	57.2803	152.446	55.3663	56.577		NAD(P)-binding Rossmann-fold superfamily protein
AT5G20000	10	.	-1.70123	.	.	1.52746	25.1993	72.158	22.649	21.7717		AAA-type ATPase family protein
AT5G20910	10	.	-1.51593	.	.	1.50955	11.731	33.234	11.3713	11.396	AIP2	RING/U-box superfamily protein
AT5G22060	10	.	-1.50035	.	.	1.72871	47.2237	155.291	47.2027	53.9423	J2	DNAJ homologue 2
AT5G22860	10	.	-1.95254	.	.	1.83693	8.32467	29.4967	8.39567	7.54833		Serine carboxypeptidase S28 family protein
AT5G24200	10	.	-1.90485	.	.	2.16148	1.53933	7.136	1.523	1.77467		alpha/beta-Hydrolases superfamily protein
AT5G25450	10	.	-3.20274	.	.	2.91186	0.649667	4.31267	0.701333	0.449333		Cytochrome bd ubiquinol oxidase, 14kDa subunit
AT5G26920	10	.	-1.4414	.	.	1.36979	15.746	40.5357	13.251	14.6117	CBP60G	Cam-binding protein 60-like G
AT5G27600	10	.	-1.48308	.	.	1.50592	9.24033	26.0793	9.06333	9.15933	LACS7	long-chain acyl-CoA synthetase 7
AT5G39660	10	.	-1.85015	.	.	1.39202	2.797	7.47733	2.25433	1.85067	CDF2	cycling DOF factor 2
AT5G41750	10	.	-1.34555	.	.	1.25063	9.97267	23.7357	6.52433	8.95033		Disease resistance protein (TIR-NBS-LRR class) family
AT5G44480	10	.	-2.8038	.	.	2.39123	1.24967	5.89233	0.968	0.852667	DUR	NAD(P)-binding Rossmann-fold superfamily protein
AT5G44585	10	.	-2.16991	.	.	2.52949	0.649667	3.668	0.482	0.774333		hypothetical protein
AT5G46080	10	.	-1.89281	.	.	1.88129	4.075	15.034	3.73767	3.93933		Protein kinase superfamily protein
AT5G46500	10	.	-1.76359	.	.	1.85453	1.47833	4.96467	1.20667	1.39567		protein VARIATION IN COMPOUND TRIGGERED ROOT growth protein
AT5G47910	10	.	-1.41545	.	.	1.1143	36.2933	77.9387	29.9133	28.6777	RBOHD	respiratory burst oxidase homologue D
AT5G48180	10	.	-1.99613	.	.	1.65855	68.5743	214.173	56.1747	52.9467	NSP5	nitrile specifier protein 5
AT5G49700	10	.	-2.96223	.	.	2.78808	0.472667	3.24967	0.455	0.385333		Putative AT-hook DNA-binding family protein
AT5G52450	10	.	-1.32363	.	.	1.38381	11.684	30.3	11.6287	11.874		MATE efflux family protein
AT5G52720	10	.	-3.68511	.	.	3.94021	0.177	2.747	0.214333	0.223667		Copper transport protein family
AT5G54500	10	.	-1.56305	.	.	1.79407	71.7943	249.003	76.278	82.4183	FQR1	flavodoxin-like quinone reductase 1
AT5G54810	10	.	-1.44099	.	.	1.4942	174.791	488.305	172.991	176.857	TSB1	tryptophan synthase beta-subunit 1
AT5G55560	10	.	-1.77983	.	.	1.82483	2.76367	9.801	2.451	2.751		Protein kinase superfamily protein
AT5G56960	10	.	-4.27803	.	.	4.50331	0.108	2.55267	0.062	0.137333		basic helix-loop-helix (bHLH) DNA-binding family protein
AT5G57010	10	.	-2.64962	.	.	2.8656	0.371	2.70267	0.374333	0.42		calmodulin-binding family protein
AT5G57480	10	.	-2.3366	.	.	2.15692	1.48133	6.64467	1.332	1.25933		P-loop containing nucleoside triphosphate hydrolases superfamily protein
AT5G57910	10	.	-1.70869	.	.	1.29322	9.596	23.4717	7.156	7.07767		ribosomal RNA small subunit methyltransferase G
AT5G59530	10	.	-5.1163	.	.	3.77221	0.127	1.959	0.024	0.0666667		2-oxoglutarate (2OG) and Fe(II)-dependent oxygenase superfamily protein
AT5G60630	10	.	-2.16708	.	.	2.56383	0.768667	4.63267	0.748333	1.006		transmembrane protein
AT5G61560	10	.	-1.87252	.	.	1.8534	3.47133	12.3943	3.102	3.30033		U-box domain-containing protein kinase family protein
AT5G62020	10	.	-1.71209	.	.	1.53353	4.41533	12.7093	3.41233	3.77967	HSFB2A	heat shock transcription factor B2A
AT5G65140	10	.	-1.36717	.	.	1.53974	4.658	13.3833	4.20133	5.02333	TPPJ	Haloacid dehalogenase-like hydrolase (HAD) superfamily protein
AT5G65300	10	.	-1.54689	.	.	.	10.572	24.1243	6.995	8.017		hypothetical protein
AT5G65380	10	.	-1.39969	.	.	1.45171	13.499	36.6017	13.9847	13.655		MATE efflux family protein
AT5G65600	10	.	-2.83964	.	.	2.5603	0.717333	4.282	0.661333	0.569		Concanavalin A-like lectin protein kinase family protein
AT5G67340	10	.	-1.77773	.	.	2.08485	2.16933	9.253	1.97933	2.64967		ARM repeat superfamily protein
AT1G01250	11	.	1.68661	.	.	.	5.70433	2.958	6.6	9.75333		Integrase-type DNA-binding superfamily protein
AT1G03310	11	.	1.13612	.	.	.	25.877	16.615	37.3257	35.925	DBE1	debranching enzyme 1
AT1G03630	11	.	1.18358	.	.	.	183.077	99.9217	212.618	230.605	POR C	protochlorophyllide oxidoreductase C
AT1G04250	11	.	1.01586	.	.	.	29.1953	15.6697	34.7797	31.3913	AXR3	AUX/IAA transcriptional regulator family protein
AT1G04660	11	.	1.53491	.	.	.	3.10667	1.5	2.538	4.35433		glycine-rich protein
AT1G05540	11	.	1.41601	.	.	.	3.16167	1.39467	4.44667	3.71067		hypothetical protein (DUF295)
AT1G06080	11	.	1.22383	.	.	.	5.03833	2.74267	7.56633	6.33567	ADS1	delta 9 desaturase 1
AT1G06680	11	.	1.04528	.	.	.	4491.7	2492.89	5293.06	5294.37	PSBP-1	photosystem II subunit P-1
AT1G06980	11	.	1.89945	.	.	.	3.67033	1.827	6.076	6.69133		6,7-dimethyl-8-ribityllumazine synthase
AT1G07440	11	.	1.20014	.	.	.	51.6783	28.868	61.233	61.552		NAD(P)-binding Rossmann-fold superfamily protein
AT1G08380	11	.	1.04472	.	.	.	4847.78	2981.42	5744.16	6034.36	PSAO	photosystem I subunit O
AT1G08390	11	.	1.01064	.	.	.	16.167	12.3107	19.0607	23.113		recQ-mediated instability-like protein
AT1G12090	11	.	1.05401	.	.	.	1253.55	692.298	1385.72	1408.9	ELP	extensin-like protein
AT1G12900	11	.	1.12708	.	.	.	956.614	562.184	1152.82	1242.87	GAPA-2	glyceraldehyde 3-phosphate dehydrogenase A subunit 2
AT1G13920	11	.	1.00888	.	.	.	12.03	7.651	13.116	14.384		Remorin family protein
AT1G13930	11	.	1.06939	.	.	.	2740.5	1898.62	3418.3	3952.83		oleosin-B3-like protein
AT1G14150	11	.	1.03032	.	.	.	138.088	83.4403	144.506	166.65	PnsL2	PsbQ-like 2
AT1G14345	11	.	1.04263	.	.	.	73.257	44.5143	83.086	90.2213		NAD(P)-linked oxidoreductase superfamily protein
AT1G15260	11	.	1.01168	.	.	.	31.2617	20.961	39.4267	41.4163		LOW protein: ATP-dependent RNA helicase-like protein
AT1G15820	11	.	1.19617	.	.	.	5191.35	2850.31	6642.49	6407.02	LHCB6	light harvesting complex photosystem II subunit 6
AT1G17650	11	.	1.00852	.	.	.	43.5297	25.8163	45.4497	50.9937	GLYR2	glyoxylate reductase 2
AT1G18060	11	.	1.10199	.	.	.	94.5213	55.6003	118.501	117.239		microbial collagenase
AT1G18170	11	.	1.08708	.	.	.	44.2743	25.139	47.9833	52.6103		FKBP-like peptidyl-prolyl cis-trans isomerase family protein
AT1G18265	11	.	1.90886	.	.	.	4.543	2.095	6.59067	8.02233		zein-binding protein (Protein of unknown function, DUF593)
AT1G18330	11	.	1.44015	.	.	.	9.05767	4.97467	12.3313	13.3403	EPR1	Homeodomain-like superfamily protein
AT1G18360	11	.	1.0551	.	.	.	33.1863	19.5027	39.057	40.0153		alpha/beta-Hydrolases superfamily protein
AT1G18810	11	.	1.44199	.	.	.	8.15133	4.03333	10.2843	10.8777		phytochrome kinase substrate-like protein
AT1G19150	11	.	1.32934	.	.	.	98.3867	51.7997	119.484	128.143	Lhca6	PSI type II chlorophyll a/b-binding protein (Lhca2*1)
AT1G20340	11	.	1.28791	.	.	.	2269.73	1377.39	2873.51	3299.76	DRT112	Cupredoxin superfamily protein
AT1G22030	11	.	1.04863	.	.	.	4.20533	3.10367	5.44067	6.35667		BPS1-like protein
AT1G22630	11	.	1.12375	.	.	.	104.598	68.4207	123.178	146.865		SSUH2-like protein
AT1G23205	11	.	1.17236	.	.	.	4.95433	3.024	4.70267	6.925		Plant invertase/pectin methylesterase inhibitor superfamily protein
AT1G26210	11	.	1.18993	.	.	.	13.425	8.97933	21.0203	20.53	SOFL1	SOB five-like 1
AT1G26761	11	.	1.36377	.	.	.	15.2333	7.5	18.5483	19.1457		Arabinanase/levansucrase/invertase
AT1G29910	11	.	1.04731	.	.	.	8235.89	4415.12	9197.63	8948.61	CAB3	chlorophyll A/B binding protein 3
AT1G30380	11	.	1.32076	.	.	.	3272.19	1768.73	3993.25	4335.98	PSAK	photosystem I subunit K
AT1G31330	11	.	1.11969	.	.	.	3371.54	1920.4	3972.97	4094.82	PSAF	photosystem I subunit F
AT1G32080	11	.	1.13191	.	.	.	132.411	78.3707	156.726	168.584	LrgB	membrane protein
AT1G32220	11	.	1.05297	.	.	.	58.6107	38.2877	69.8613	78.041		NAD(P)-binding Rossmann-fold superfamily protein
AT1G38131	11	.	1.07105	.	.	.	6.95433	3.56267	7.49067	7.496		O-fucosyltransferase family protein
AT1G43560	11	.	1.04119	.	.	.	93.9567	58.38	106.831	118.132	ty2	thioredoxin Y2
AT1G45010	11	.	1.34241	.	.	.	24.1217	12.4347	27.7953	32.0037		TRAM, LAG1 and CLN8 (TLC) lipid-sensing domain containing protein
AT1G48100	11	.	1.52663	.	.	.	6.56267	3.699	9.14733	10.5897		Pectin lyase-like superfamily protein
AT1G48330	11	.	1.29349	.	.	.	26.304	17.3097	34.0377	41.875		SsrA-binding protein
AT1G49975	11	.	1.19869	.	.	.	52.8797	28.7677	54.7043	65.1697		photosystem I reaction center subunit N
AT1G51080	11	.	1.30249	.	.	.	18.6703	11.2603	25.102	27.6823		golgin family A protein
AT1G51090	11	.	1.21744	.	.	.	42.393	23.206	55.1083	52.689		Heavy metal transport/detoxification superfamily protein
AT1G51100	11	.	1.03992	.	.	.	38.713	27.764	45.257	56.292	CRR41	potassium/sodium hyperpolarization-activated cyclic nucleotide-gated channel protein
AT1G51400	11	.	1.24967	.	.	-1.05353	1851.61	886.744	2086.64	2069.37		Photosystem II 5 kD protein
AT1G52230	11	.	1.15739	.	.	.	2773.74	1398.05	2985.95	3059.1	PSAH2	photosystem I subunit H2
AT1G52240	11	.	1.00048	.	.	.	3.65167	2.53533	4.949	4.99267	ROPGEF11	rop guanine nucleotide exchange factor-like protein
AT1G53035	11	.	1.42819	.	.	.	27.1883	15.9813	38.171	44.12		transmembrane protein
AT1G53520	11	.	1.08996	.	.	.	30.1623	15.1547	34.384	31.8387	FAP3	Chalcone-flavanone isomerase family protein
AT1G54820	11	.	1.02779	.	.	.	32.3167	17.5007	35.5943	34.8063		Protein kinase superfamily protein
AT1G55670	11	.	1.34904	.	.	.	3408.34	1969.31	4355.01	4922.43	PSAG	photosystem I subunit G
AT1G56430	11	.	1.77988	.	.	.	8.30933	4.15567	11.141	14.3357	NAS4	nicotianamine synthase 4
AT1G60590	11	.	1.04836	.	.	.	7.99667	4.907	8.53867	9.99833		Pectin lyase-like superfamily protein
AT1G60950	11	.	1.39071	.	.	.	2061	1233.82	2588.83	3173.1	FED A	2Fe-2S ferredoxin-like superfamily protein
AT1G61520	11	.	1.05072	.	.	.	4677.7	2740.26	5411.69	5297.79	LHCA3	PSI type III chlorophyll a/b-binding protein
AT1G64390	11	.	1.52424	.	.	.	59.502	35.0213	96.3547	99.012	GH9C2	glycosyl hydrolase 9C2
AT1G66350	11	.	1.06195	.	.	.	11.605	7.002	16.201	14.3503	RGL1	RGA-like 1
AT1G67740	11	.	1.05633	.	.	.	760.976	464.731	881.795	947.961	PSBY	photosystem II BY
AT1G68540	11	.	1.02717	.	.	.	7.93633	4.897	9.19867	9.49233	TKPR2	NAD(P)-binding Rossmann-fold superfamily protein
AT1G69523	11	.	1.00495	.	.	.	8.51933	4.82067	8.95467	9.626		S-adenosyl-L-methionine-dependent methyltransferases superfamily protein
AT1G70640	11	.	1.48391	.	.	.	8.23833	4.86267	13.934	13.4887		octicosapeptide/Phox/Bem1p (PB1) domain-containing protein
AT1G70890	11	.	1.02148	.	.	.	136.76	85.384	171.011	170.272	MLP43	MLP-like protein 43
AT1G72130	11	.	1.23289	.	.	.	8.45133	5.24767	10.3053	12.2637		Major facilitator superfamily protein
AT1G74070	11	.	1.08126	.	.	.	37.987	24.2917	44.1097	50.6567		Cyclophilin-like peptidyl-prolyl cis-trans isomerase family protein
AT1G74890	11	.	1.16766	.	.	.	10.881	5.92133	10.3903	13.2993	ARR15	response regulator 15
AT1G75350	11	.	1.00788	.	.	.	485.296	292.583	516.455	577.788	emb2184	Ribosomal protein L31
AT1G75690	11	.	1.2032	.	.	.	184.171	98.645	215.402	223.103	LQY1	DnaJ/Hsp40 cysteine-rich domain superfamily protein
AT1G78020	11	.	1.09781	.	.	.	63.0587	42.5723	80.926	89.5497		senescence-associated family protein, putative (DUF581)
AT1G78170	11	.	1.19427	.	.	.	11.3737	6.395	12.8557	14.587		E3 ubiquitin-protein ligase
AT1G78230	11	.	1.01519	.	.	.	6.94667	4.26767	10.762	8.49567		Outer arm dynein light chain 1 protein
AT1G78995	11	.	1.11602	.	.	.	48.0597	29.557	56.909	63.0477		hypothetical protein
AT2G01505	11	.	1.26894	.	.	.	3.396	2.26233	4.87433	5.42233	CLE16	CLAVATA3/ESR-RELATED 16
AT2G06520	11	.	1.21916	.	.	.	3436.76	2046.96	4124.17	4673.76	PSBX	photosystem II subunit X
AT2G10940	11	.	1.16468	.	.	-1.07157	1096.84	519.033	1151.13	1140.88		Bifunctional inhibitor/lipid-transfer protein/seed storage 2S albumin superfamily protein
AT2G14520	11	.	1.06142	.	.	.	5.482	3.33733	5.52	6.94533		CBS domain protein (DUF21)
AT2G18328	11	.	1.11032	.	.	.	104.073	56.584	107.789	120.251	RL4	RAD-like 4
AT2G18969	11	.	1.60513	.	.	.	10.564	4.68567	11.379	14.0473		transcription factor/transcription regulator
AT2G20260	11	.	1.06356	.	.	.	1256.15	809.546	1581.77	1661.27	PSAE-2	photosystem I subunit E-2
AT2G21370	11	.	1.00671	.	.	.	25.0513	14.388	26.426	28.1393	XK-1	xylulose kinase-1
AT2G21830	11	.	1.07141	.	.	.	4.26133	2.33867	5.51433	4.86		Cysteine/Histidine-rich C1 domain family protein
AT2G22190	11	.	1.03407	.	.	.	18.0427	11.2473	23.504	22.699	TPPE	Haloacid dehalogenase-like hydrolase (HAD) superfamily protein
AT2G23430	11	.	1.01816	.	.	.	15.7227	11.1477	22.534	22.3983	ICK1	Cyclin-dependent kinase inhibitor family protein
AT2G23590	11	.	2.06895	.	.	-1.95128	1.78133	0.399	1.386	1.89233	MES8	methyl esterase 8
AT2G24090	11	.	1.027	.	.	.	483.604	304.496	540.143	608.986	PRPL35	Ribosomal protein L35
AT2G28900	11	.	1.0399	.	.	.	868.321	472.749	938.26	953.556	OEP16-1	outer plastid envelope protein 16-1
AT2G31040	11	.	1.01542	.	.	.	111.142	64.2163	119.574	127.654		ATP synthase protein I-like protein
AT2G32500	11	.	1.05813	.	.	.	43.679	26.1653	47.5287	53.7617		Stress responsive alpha-beta barrel domain protein
AT2G35960	11	.	1.1322	.	.	.	60.3093	35.854	75.2837	77.2857	NHL12	NDR1/HIN1-like 12
AT2G36145	11	.	1.26603	.	.	.	99.611	55.0043	115.699	129.717		hypothetical protein
AT2G37720	11	.	2.67678	.	.	.	0.653667	0.189	1.11433	1.28667	TBL15	TRICHOME BIREFRINGENCE-LIKE 15
AT2G39920	11	.	1.20401	.	.	.	42.0373	24.3393	49.3407	53.3537		HAD superfamily, subfamily IIIB acid phosphatase
AT2G41950	11	.	1.00395	.	.	.	26.7147	18.1197	31.791	35.899		DNA-directed RNA polymerase subunit beta
AT2G42540	11	.	1.12723	.	.	-1.10752	1186.23	581.83	1360.34	1401.79	COR15A	cold-regulated 15a
AT2G45180	11	.	1.16352	.	.	.	1150.98	569.327	1241.27	1249.81		Bifunctional inhibitor/lipid-transfer protein/seed storage 2S albumin superfamily protein
AT2G45190	11	.	1.15966	.	.	.	16.8323	9.00633	17.461	19.614	AFO	Plant-specific transcription factor YABBY family protein
AT2G45400	11	.	.	.	.	-1.06762	8.621	4.46167	7.28933	8.86267	BEN1	NAD(P)-binding Rossmann-fold superfamily protein
AT2G45560	11	.	1.32437	.	.	.	43.672	26.9113	67.2303	67.8793	CYP76C1	cytochrome P450, family 76, subfamily C, polypeptide 1
AT2G46535	11	.	1.0765	.	.	.	10.3683	7.24367	13.3287	15.2053		hypothetical protein
AT2G46710	11	.	1.12977	.	.	-1.0699	14.028	6.56767	14.6553	14.2633	ROPGAP3	Rho GTPase activating protein with PAK-box/P21-Rho-binding domain-containing protein
AT2G46820	11	.	1.23748	.	.	.	1273.47	687.878	1567.76	1611.53	PSI-P	photosystem I P subunit
AT3G01440	11	.	1.33896	.	.	.	34.7977	19.0883	41.134	47.811	PnsL3	PsbQ-like 1
AT3G01500	11	.	1.2552	.	.	.	1059	646.773	1327.2	1512.9	CA1	carbonic anhydrase 1
AT3G02730	11	.	1.03722	.	.	.	330.675	220.074	404.465	443.339	TRXF1	thioredoxin F-type 1
AT3G05180	11	.	1.11708	.	.	.	12.633	6.788	13.4173	14.6543		GDSL-like Lipase/Acylhydrolase superfamily protein
AT3G06868	11	.	1.16676	.	.	.	11.0447	5.94667	13.812	13.3167		vitellogenin-like protein
AT3G08600	11	.	1.03716	.	.	.	9.69367	5.465	12.5227	10.994		transmembrane protein, putative (DUF1191)
AT3G10060	11	.	1.09274	.	.	.	89.7453	55.604	108.896	116.697		FKBP-like peptidyl-prolyl cis-trans isomerase family protein
AT3G10940	11	.	1.04643	.	.	.	36.0677	20.5057	42.6127	41.749	LSF2	dual specificity protein phosphatase (DsPTP1) family protein
AT3G14210	11	.	1.22327	.	.	.	1483.18	887.851	2004.68	2035.62	ESM1	GDSL-like lipase/acylhydrolase superfamily protein
AT3G15570	11	.	1.04964	.	.	.	24.6083	12.4797	30.2797	25.3883		Phototropic-responsive NPH3 family protein
AT3G16250	11	.	1.23272	.	.	.	102.157	63.899	123.003	148.025	PnsB3	NDH-dependent cyclic electron flow 1
AT3G16370	11	.	1.02208	.	.	.	187.635	100.809	220.982	200.975		GDSL-like Lipase/Acylhydrolase superfamily protein
AT3G17640	11	.	1.52872	.	.	-1.19401	5.03033	2.19833	6.26333	6.23067		Leucine-rich repeat (LRR) family protein
AT3G20820	11	.	1.01867	.	.	.	101.466	52.394	113.282	104.234		Leucine-rich repeat (LRR) family protein
AT3G21055	11	.	1.22372	.	.	.	3157.91	1857.52	3793.1	4211.04	PSBTN	photosystem II subunit T
AT3G23805	11	.	1.00222	.	.	.	26.8267	14.3183	26.3357	28.133	RALFL24	ralf-like 24
AT3G26060	11	.	1.07656	.	.	.	439.052	268.618	487.569	548.274	PRXQ	Thioredoxin superfamily protein
AT3G26310	11	.	1.02085	.	.	.	7.03167	4.61667	11.0123	9.267	CYP71B35	cytochrome P450, family 71, subfamily B, polypeptide 35
AT3G27830	11	.	1.07007	.	.	.	596.538	389.49	663.543	802.979	RPL12-A	ribosomal protein L12-A
AT3G28130	11	.	1.02518	.	.	.	22.497	12.859	27.8687	25.685	UMAMIT44	nodulin MtN21 /EamA-like transporter family protein
AT3G29030	11	.	1.25117	.	.	.	42.4247	27.2533	65.949	63.872	EXPA5	expansin A5
AT3G30460	11	.	2.40323	.	.	.	2.18433	0.649667	2.79767	4.05167		RING/U-box superfamily protein
AT3G45230	11	.	1.2012	.	.	.	11.6013	6.08067	12.865	13.6883		hydroxyproline-rich glycoprotein family protein
AT3G46780	11	.	1.1151	.	.	-1.00627	722.07	357.408	806.427	759.524	PTAC16	plastid transcriptionally active 16
AT3G47070	11	.	1.06335	.	.	.	254.964	181.214	308.351	371.854		thylakoid soluble phosphoprotein
AT3G48420	11	.	1.04619	.	.	.	139.349	78.732	149.176	159.665		Haloacid dehalogenase-like hydrolase (HAD) superfamily protein
AT3G49670	11	.	1.38292	.	.	.	18.0877	11.1723	31.2483	28.642	BAM2	Leucine-rich receptor-like protein kinase family protein
AT3G52720	11	.	1.14642	.	.	.	24.6	12.3053	26.26	27.1273	ACA1	alpha carbonic anhydrase 1
AT3G54890	11	.	1.12828	.	.	.	5648.92	3155.4	6669.98	6899.45	LHCA1	chlorophyll a-b binding protein 6
AT3G56080	11	.	1.25692	.	.	-1.13689	9.18667	4.156	11.3243	9.72167		S-adenosyl-L-methionine-dependent methyltransferases superfamily protein
AT3G59400	11	.	1.23696	.	.	-1.05806	123.064	58.5693	138.891	135.941	GUN4	protein GENOMES UNCOUPLED 4
AT3G59780	11	.	1.05687	.	.	.	100.15	56.0753	114.034	114.578		Rhodanese/Cell cycle control phosphatase superfamily protein
AT3G61750	11	.	1.34193	.	.	.	3.001	1.754	4.835	4.433		Cytochrome b561/ferric reductase transmembrane with DOMON related domain-containing protein
AT3G62750	11	.	1.03471	.	.	.	105.288	56.8637	117.806	113.69	BGLU8	beta glucosidase 8
AT3G63140	11	.	1.24788	.	.	.	445.758	222.11	505.673	517.834	CSP41A	chloroplast stem-loop binding protein of 41 kDa
AT3G63160	11	.	1.25327	.	.	.	2922.2	1632.49	3304.18	3817.24	OEP6	outer envelope membrane protein
AT4G00165	11	.	1.36533	.	.	.	72.6843	48.6427	92.046	117.947		Bifunctional inhibitor/lipid-transfer protein/seed storage 2S albumin superfamily protein
AT4G02770	11	.	1.07678	.	.	.	2620.6	1592.32	3100.96	3294.46	PSAD-1	photosystem I subunit D-1
AT4G05180	11	.	1.20518	.	.	.	3531.41	1832.94	4414.56	4149.3	PSBQ-2	photosystem II subunit Q-2
AT4G07995	11	.	1.5705	.	.	.	2.547	1.165	3.225	3.456		hypothetical protein
AT4G09010	11	.	1.05622	.	.	.	378.152	197.562	405.535	403.354	TL29	ascorbate peroxidase 4
AT4G09650	11	.	1.08822	.	.	.	1010.88	615.884	1210.03	1284.68	ATPD	F-type H+-transporting ATPase subunit delta
AT4G10340	11	.	1.07297	.	.	.	6048.88	3375.72	7075.06	6965.31	LHCB5	light harvesting complex of photosystem II 5
AT4G12550	11	.	1.9349	.	.	.	4.013	1.692	5.659	6.44633	AIR1	Auxin-Induced in Root cultures 1
AT4G12900	11	.	1.03413	.	.	.	25.8487	16.0553	30.4907	32.6163		Gamma interferon responsive lysosomal thiol (GILT) reductase family protein
AT4G13800	11	.	1.35402	.	.	.	2.59767	1.631	3.745	4.16433		magnesium transporter NIPA (DUF803)
AT4G14540	11	.	1.07737	.	.	.	52.083	25.9723	52.787	53.7847	NF-YB3	nuclear factor Y, subunit B3
AT4G14890	11	.	1.25415	.	.	.	138.827	84.9627	174.212	199.382	FdC1	2Fe-2S ferredoxin-like superfamily protein
AT4G17600	11	.	1.01669	.	.	.	129.709	75.7183	138.235	150.523	LIL3:1	Chlorophyll A-B binding family protein
AT4G17880	11	.	1.2169	.	.	.	8.791	4.59467	11.763	10.581	MYC4	Basic helix-loop-helix (bHLH) DNA-binding family protein
AT4G18270	11	.	1.11545	.	.	.	13.8717	7.40167	14.6393	15.867	TRANS11	translocase 11
AT4G18970	11	.	1.15846	.	.	-1.01814	29.7693	14.4107	34.713	31.861		GDSL-like Lipase/Acylhydrolase superfamily protein
AT4G19120	11	.	1.17164	.	.	.	116.914	71.7693	164.051	158.973	ERD3	S-adenosyl-L-methionine-dependent methyltransferases superfamily protein
AT4G21760	11	.	1.29458	.	.	.	8.654	5.126	9.46067	12.4733	BGLU47	beta-glucosidase 47
AT4G23020	11	.	1.40147	.	.	-1.03729	6.50333	3.11267	6.72333	8.17433	TRM11	hypothetical protein
AT4G23290	11	.	1.38514	.	.	.	15.9783	8.363	21.3783	21.4233	CRK21	cysteine-rich RLK (RECEPTOR-like protein kinase) 21
AT4G23490	11	.	1.01387	.	.	.	4.504	2.46033	5.19733	4.91267		fringe-like protein (DUF604)
AT4G23750	11	.	1.18565	.	.	.	7.276	4.71367	10.0863	10.8133	CRF2	cytokinin response factor 2
AT4G24780	11	.	1.24008	.	.	.	76.9053	40.08	86.0677	92.409		Pectin lyase-like superfamily protein
AT4G25100	11	.	1.38844	.	.	.	459.32	277.987	664.805	715.194	FSD1	Fe superoxide dismutase 1
AT4G25910	11	.	1.02662	.	.	.	22.7243	14.1953	25.4517	28.7513	NFU3	NFU domain protein 3
AT4G26530	11	.	1.27478	.	.	.	281.963	151.999	404.707	354.778	FBA5	Aldolase superfamily protein
AT4G26790	11	.	1.02375	.	.	.	4.92467	3.27167	6.638	6.48833		GDSL-like Lipase/Acylhydrolase superfamily protein
AT4G27595	11	.	1.0324	.	.	.	4.89733	2.59533	5.09633	5.25467		WEB family protein (DUF827)
AT4G27700	11	.	1.18814	.	.	.	165.533	97.3453	204.678	217.83		Rhodanese/Cell cycle control phosphatase superfamily protein
AT4G28250	11	.	1.04082	.	.	.	55.5357	31.664	53.796	64.249	EXPB3	expansin B3
AT4G28660	11	.	1.21114	.	.	.	149.125	96.0317	179.952	218.622	PSB28	photosystem II reaction center PSB28 protein
AT4G28700	11	.	1.99528	.	.	.	0.597	0.176	0.707667	0.839333	AMT1%3B4	ammonium transporter 1;4
AT4G28750	11	.	1.1363	.	.	.	2307.7	1412.28	2897.7	3046.74	PSAE-1	Photosystem I reaction centre subunit IV / PsaE protein
AT4G30400	11	.	1.27943	.	.	.	3.44	2.14633	5.137	5.23867		RING/U-box superfamily protein
AT4G30650	11	.	1.02635	.	.	.	883.425	483.3	897.17	965.977		Low temperature and salt responsive protein family
AT4G30660	11	.	1.00169	.	.	.	515.735	302.3	526.105	595.412		Low temperature and salt responsive protein family
AT4G30710	11	.	1.16558	.	.	.	6.46567	3.64467	8.75233	8.194	QWRF8	QWRF motif protein (DUF566)
AT4G32890	11	.	1.31686	.	.	.	3.32467	1.497	4.35467	3.742	GATA9	GATA transcription factor 9
AT4G34650	11	.	1.17884	.	.	-1.1935	10.354	4.536	11.0743	10.6523	SQS2	squalene synthase 2
AT4G35320	11	.	1.10601	.	.	.	21.768	14.397	34.012	30.5117		hypothetical protein
AT4G36570	11	.	1.31209	.	.	.	16.7553	9.601	17.7557	23.8523	RL3	RAD-like 3
AT4G37800	11	.	1.40246	.	.	.	95.898	52.031	117.914	135.228	XTH7	xyloglucan endotransglucosylase/hydrolase 7
AT4G37925	11	.	1.0305	.	.	.	55.414	38.0347	70.0507	76.534	NdhM	subunit NDH-M of NAD(P)H:plastoquinone dehydrogenase complex
AT4G39510	11	.	1.07133	.	.	-1.03919	16.145	7.77467	15.7433	16.155	CYP96A12	cytochrome P450, family 96, subfamily A, polypeptide 12
AT4G39800	11	.	1.09183	.	.	.	90.7743	59.9863	143.094	125.488	MIPS1	myo-inositol-1-phosphate synthase 1
AT5G02890	11	.	1.37099	.	.	-1.14578	20.4487	9.097	23.0223	23.3177		HXXXD-type acyl-transferase family protein
AT5G05830	11	.	1.00886	.	.	.	16.5583	10.277	20.67	20.6173		RING/FYVE/PHD zinc finger superfamily protein
AT5G05840	11	.	1.62095	.	.	.	1.48	0.755333	2.44	2.36333		replication factor C subunit, putative (DUF620)
AT5G06270	11	.	1.11334	.	.	.	6.90867	3.484	7.48133	7.49267		hypothetical protein
AT5G06510	11	.	1.89057	.	.	.	0.933667	0.553	1.26933	1.82267	NF-YA10	nuclear factor Y, subunit A10
AT5G15430	11	.	.	.	.	-1.59082	1.09567	0.34	1.28533	1.02267		Plant calmodulin-binding protein-like protein
AT5G15970	11	.	1.10621	.	.	.	4132.43	2106.16	4466.42	4452.56	KIN2	stress-responsive protein (KIN2) / stress-induced protein (KIN2) / cold-responsive protein (COR6.6) / cold-regulated protein (COR6.6)
AT5G16140	11	.	1.04767	.	.	.	16.6837	9.726	16.861	20.6003		Peptidyl-tRNA hydrolase family protein
AT5G16940	11	.	1.09976	.	.	.	11.7333	6.39133	12.351	14.5563		carbon-sulfur lyase
AT5G18660	11	.	1.08594	.	.	.	82.0427	43.507	89.8463	90.8297	PCB2	NAD(P)-binding Rossmann-fold superfamily protein
AT5G21430	11	.	1.11159	.	.	.	87.8027	55.4087	108.622	117.688	NdhU	Chaperone DnaJ-domain superfamily protein
AT5G22580	11	.	1.01844	.	.	.	327.025	224.973	460.769	447.183		Stress responsive A/B Barrel Domain-containing protein
AT5G26230	11	.	1.00177	.	.	.	10.4063	5.43433	10.886	10.7643	MAKR1	membrane-associated kinase regulator
AT5G28020	11	.	1.0224	.	.	.	38.4853	21.9797	46.7023	44.674	CYSD2	cysteine synthase D2
AT5G35740	11	.	1.48912	.	.	.	15.59	6.88933	16.7043	19.6997		Carbohydrate-binding X8 domain superfamily protein
AT5G36120	11	.	1.05912	.	.	.	61.888	43.5147	77.2157	89.115	CCB3	cofactor assembly, complex C (B6F)
AT5G38410	11	.	1.26217	.	.	.	5150.7	2700.43	5749.33	6483.5	RBCS3B	Ribulose bisphosphate carboxylase (small chain) family protein
AT5G38420	11	.	1.44886	.	.	-1.10141	1223.01	567.262	1376.75	1518	RBCS2B	Ribulose bisphosphate carboxylase (small chain) family protein
AT5G38520	11	.	1.01758	.	.	.	80.7577	47.907	94.8937	98.142		alpha/beta-Hydrolases superfamily protein
AT5G40150	11	.	1.1571	.	.	-1.06228	9.08533	4.25867	10.6023	9.46567		Peroxidase superfamily protein
AT5G41050	11	.	1.09793	.	.	.	12.989	7.52633	14.0883	15.9833		Pollen Ole e 1 allergen and extensin family protein
AT5G41900	11	.	1.39219	.	.	.	5.00033	2.872	7.57733	7.43167		alpha/beta-Hydrolases superfamily protein
AT5G42040	11	.	1.75557	.	.	.	1.56033	0.849	1.97633	2.71167	RPN12b	regulatory particle non-ATPase 12B
AT5G43750	11	.	1.15282	.	.	.	140.006	74.3827	158.924	162.616	PnsB5	NAD(P)H dehydrogenase 18
AT5G44190	11	.	1.12228	.	.	.	67.2723	41.2237	106.183	88.1223	GLK2	GOLDEN2-like 2
AT5G44530	11	.	1.09955	.	.	.	13.3927	6.97567	17.221	14.668		Subtilase family protein
AT5G45680	11	.	1.05494	.	.	.	129.87	76.6887	135.844	156.784	FKBP13	FK506-binding protein 13
AT5G45950	11	.	1.10447	.	.	.	38.9743	19.6887	40.1097	41.8687		GDSL-like Lipase/Acylhydrolase superfamily protein
AT5G46600	11	.	1.12383	.	.	.	8.11867	5.62133	11.6037	11.8897		aluminum activated malate transporter family protein
AT5G46690	11	.	1.12041	.	.	.	18.554	10.093	24.1137	21.738	bHLH071	beta HLH protein 71
AT5G49170	11	.	1.28365	.	.	-1.07737	7.412	3.45667	9.625	8.33533		hypothetical protein
AT5G50490	11	.	1.33522	.	.	.	12.0773	6.222	12.3547	15.694	NF-YC5	nuclear factor Y, subunit C5
AT5G50740	11	.	1.01404	.	.	.	47.4233	27.738	59.6337	57.2513		Heavy metal transport/detoxification superfamily protein
AT5G50800	11	.	1.48624	.	.	.	5.77333	3.12	9.203	8.72567	SWEET13	Nodulin MtN3 family protein
AT5G51010	11	.	1.01645	.	.	.	94.632	68.726	117.74	136.728		Rubredoxin-like superfamily protein
AT5G55950	11	.	1.58944	.	.	.	1.91667	0.733333	2.39367	2.42667		Nucleotide/sugar transporter family protein
AT5G58310	11	.	1.48738	.	.	.	13.93	7.48933	16.7427	20.7137	MES18	methyl esterase 18
AT5G59350	11	.	1.43315	.	.	.	14.882	7.54067	18.991	19.0807		transmembrane protein
AT5G61340	11	.	1.20084	.	.	.	9.449	5.364	11.2293	12.232		transmembrane protein
AT5G61605	11	.	1.42685	.	.	.	19.8817	8.873	22.8867	23.0723		EMBRYO SURROUNDING FACTOR-like protein
AT5G62920	11	.	1.20459	.	.	.	18.331	12.6307	24.4053	28.7207	ARR6	response regulator 6
AT5G64040	11	.	1.16947	.	.	.	2634.36	1470.08	3315.6	3241.57	PSAN	photosystem I reaction center subunit PSI-N, chloroplast, putative / PSI-N, putative (PSAN)
AT5G65310	11	.	1.25877	.	.	.	75.4983	44.3537	108.093	104.775	HB5	homeobox protein 5
AT5G65683	11	.	1.25349	.	.	.	7.101	4.46033	9.831	10.4883	WAVH2	Zinc finger (C3HC4-type RING finger) family protein
AT5G66590	11	.	1.38909	.	.	-1.11111	17.434	8.034	21.7127	20.662		CAP (Cysteine-rich secretory proteins, Antigen 5, and Pathogenesis-related 1 protein) superfamily protein
AT1G08250	12	.	.	1.89559	1.96938	.	1.212	3.68733	4.74333	4.45467	ADT6	arogenate dehydratase 6
AT1G13360	12	.	.	1.00387	.	.	60.2043	99.7163	94.4963	107.96		hypothetical protein
AT1G19960	12	.	.	1.26455	.	.	101.345	146.296	149.532	243.047		transcription factor
AT1G25150	12	.	4.69608	9.20944	.	.	0.0196667	0.497667	0.538	12.5787		F-box family protein
AT1G31835	12	.	.	1.26328	.	.	2.96567	5.38067	4.10167	6.73		hypothetical protein
AT1G55910	12	.	.	1.06645	.	.	6.52167	9.40967	9.501	13.6057	ZIP11	zinc transporter 11 precursor
AT1G69730	12	.	.	1.07783	.	1.20152	4.95433	11.308	7.435	10.462		Wall-associated kinase family protein
AT2G25510	12	.	.	1.08475	.	1.15264	1036.88	2291.95	1628.46	2194.28		transmembrane protein
AT2G29090	12	.	.	1.35552	.	.	1.426	2.53667	2.213	3.533	CYP707A2	cytochrome P450, family 707, subfamily A, polypeptide 2
AT2G31230	12	.	.	1.73066	1.27879	1.50496	8.335	23.54	20.1413	27.5953	ERF15	ethylene-responsive element binding factor 15
AT2G32160	12	.	.	1.14768	.	1.26556	11.927	29.4173	20.3603	26.0473		S-adenosyl-L-methionine-dependent methyltransferases superfamily protein
AT2G40750	12	.	.	1.2202	.	1.11609	18.8	40.5537	27.2357	43.6997	WRKY54	WRKY DNA-binding protein 54
AT2G41090	12	.	.	1.12029	.	.	300.649	461.425	464.305	652.824		Calcium-binding EF-hand family protein
AT2G46790	12	.	.	1.20677	1.04667	.	4.076	6.261	8.341	9.23967	PRR9	pseudo-response regulator 9
AT3G02790	12	.	.	9.94567	9.19383	9.76686	0	10.556	6.44133	11.2633		zinc finger (C2H2 type) family protein
AT3G08870	12	.	.	1.23273	.	.	1.77867	3.03567	3.039	4.17933		Concanavalin A-like lectin protein kinase family protein
AT3G12030	12	.	.	1.7674	.	.	3.58633	8.35633	7.41967	12.2567		transmembrane/coiled-coil protein (Protein of unknown function DUF106, transmembrane)
AT3G14200	12	.	.	1.09403	.	1.01889	12.2743	24.675	23.0833	26.036		Chaperone DnaJ-domain superfamily protein
AT3G14340	12	.	.	4.12246	4.2183	3.26983	0.594333	6.21767	13.6573	12.2063		hypothetical protein
AT3G22231	12	.	.	1.11826	.	.	492.812	729.929	692.337	1068.13	PCC1	pathogen and circadian controlled 1
AT3G22235	12	.	.	1.14588	.	.	1555.75	2253.17	2051.28	3500.43		cysteine-rich TM module stress tolerance protein
AT3G23110	12	.	.	1.00206	.	.	2.47367	4.413	4.48733	4.924	RLP37	receptor like protein 37
AT3G23120	12	.	.	1.71978	.	1.78558	2.12867	7.31167	3.55033	6.947	RLP38	receptor like protein 38
AT4G14400	12	.	.	1.16708	.	.	92.6203	174.932	129.608	211.307	ACD6	ankyrin repeat family protein
AT5G01600	12	.	.	1.27714	.	1.17503	163.811	367.651	239.677	396.479	FER1	ferretin 1
AT5G36710	12	.	.	2.49725	.	.	0.345667	2.83367	1.59667	3.79167		transmembrane protein
AT5G42530	12	.	.	1.12473	.	1.42201	1704.74	4534.88	2789.37	3712.63		hypothetical protein
AT5G54610	12	.	.	1.5898	.	1.6782	6.791	21.68	12.9713	20.474	ANK	ankyrin
AT1G01340	13	.	-1.91682	.	.	2.53498	1.58233	9.10567	1.75833	2.46733	CNGC10	cyclic nucleotide gated channel 10
AT1G01680	13	.	-2.50548	.	.	2.87814	0.928	6.90033	0.899667	1.16533	PUB54	plant U-box 54
AT1G02850	13	.	-2.54477	.	.	2.58726	3.79067	22.9563	3.99167	3.799	BGLU11	beta glucosidase 11
AT1G05560	13	.	-1.74683	.	.	2.12357	16.961	74.956	19.4883	21.318	UGT75B1	UDP-glucosyltransferase 75B1
AT1G07160	13	.	-3.55595	.	.	3.9993	0.344667	5.714	0.312333	0.435333		Protein phosphatase 2C family protein
AT1G08050	13	.	-2.3515	.	.	2.82455	2.025	14.2183	2.587	2.72867		Zinc finger (C3HC4-type RING finger) family protein
AT1G09080	13	.	-2.42474	.	.	3.00471	0.799	6.48433	1.02133	1.206	BIP3	Heat shock protein 70 (Hsp 70) family protein
AT1G10040	13	.	-2.42733	.	.	2.5854	1.363	8.248	1.36267	1.535		alpha/beta-Hydrolases superfamily protein
AT1G16030	13	.	-2.16369	.	.	2.21784	3.13	14.4467	3.50633	3.142	Hsp70b	heat shock protein 70B
AT1G16090	13	.	-2.50707	.	.	2.71364	2.02733	13.2237	2.571	2.23267	WAKL7	wall associated kinase-like 7
AT1G16420	13	.	-3.64084	.	.	5.2211	0.154	5.83267	0.373667	0.469	MC8	metacaspase 8
AT1G17745	13	.	-2.31584	.	.	2.27917	40.5667	195.104	40.6407	38.557	PGDH	D-3-phosphoglycerate dehydrogenase
AT1G21110	13	.	-2.03228	.	.	2.19557	2.87767	13.132	2.76367	3.12033	IGMT3	O-methyltransferase family protein
AT1G24145	13	.	-1.91201	.	.	2.05078	9.51867	39.1837	7.95867	10.102		transmembrane protein
AT1G25220	13	.	-1.86037	.	.	1.86135	34.0193	122.505	34.828	32.9503	ASB1	anthranilate synthase beta subunit 1
AT1G26410	13	.	-5.39189	.	.	4.83	0.131	4.05167	0.0586667	0.078		FAD-binding Berberine family protein
AT1G30755	13	.	-2.09841	.	.	2.00326	5.56967	22.7247	5.51733	5.12033		elongation factor G, putative (DUF668)
AT1G32870	13	.	-1.72407	.	.	2.11388	5.99867	26.0127	7.06	7.561	NAC13	NAC domain protein 13
AT1G33110	13	.	-2.10901	.	.	2.0548	12.5457	51.6607	11.225	11.7777		MATE efflux family protein
AT1G36622	13	.	-2.85868	.	.	2.99612	1.29767	10.452	1.10533	1.35767		transmembrane protein
AT1G55850	13	.	-2.03195	.	.	1.93614	10.322	39.2637	10.001	9.414	CSLE1	cellulose synthase like E1
AT1G59860	13	.	-2.60318	.	.	3.73224	0.763	10.3717	1.177	1.70333		HSP20-like chaperones superfamily protein
AT1G62760	13	.	-3.45994	.	.	3.12835	0.753333	6.508	0.946333	0.555333		Plant invertase/pectin methylesterase inhibitor superfamily protein
AT1G62840	13	.	-2.49425	.	.	1.95471	3.02467	11.8767	2.47567	2.00567		ankyrin repeat/KH domain protein (DUF1442)
AT1G64940	13	.	-3.84083	.	.	4.24483	0.197	3.65367	0.305333	0.253667	CYP89A6	cytochrome P450, family 87, subfamily A, polypeptide 6
AT1G65500	13	.	-2.25328	.	.	2.08864	9.93267	41.9073	8.60267	8.58567		transmembrane protein
AT1G66090	13	.	-2.17771	.	.	2.13496	8.31	36.2493	5.96067	7.83133		Disease resistance protein (TIR-NBS class)
AT1G66600	13	.	-6.83154	.	.	4.93636	0.0943333	3.27667	0.128	0.0176667	ABO3	ABA overly sensitive mutant 3
AT1G68765	13	.	-5.00891	.	.	3.26701	0.346333	3.60233	0.297667	0.0816667	IDA	Putative membrane lipoprotein
AT1G69930	13	.	-2.68778	.	.	3.08683	0.785333	6.68833	0.37	1.065	GSTU11	glutathione S-transferase TAU 11
AT1G71140	13	.	-2.23713	.	.	2.59233	4.00633	23.983	4.80933	4.993		MATE efflux family protein
AT1G72900	13	.	-1.95592	.	.	2.2888	16.7807	81.369	16.561	20.5377		Toll-Interleukin-Resistance (TIR) domain-containing protein
AT1G73810	13	.	-2.29866	.	.	2.4075	5.09933	26.905	5.308	5.36967		Core-2/I-branching beta-1,6-N-acetylglucosaminyltransferase family protein
AT1G75170	13	.	-2.01515	.	.	1.95328	5.61033	23.1587	5.661	5.47233		Sec14p-like phosphatidylinositol transfer family protein
AT1G76070	13	.	-2.37094	.	.	2.08521	5.10233	21.4823	3.734	4.02733		hypothetical protein
AT1G77450	13	.	-2.33381	.	.	2.23294	4.653	21.6417	2.942	4.215	NAC032	NAC domain containing protein 32
AT1G78340	13	.	-3.90555	.	.	4.79032	0.108667	3.207	0.09	0.180333	GSTU22	glutathione S-transferase TAU 22
AT1G78410	13	.	-1.82137	.	.	2.28396	7.908	38.553	7.82667	10.592		VQ motif-containing protein
AT2G01008	13	.	-2.0583	.	.	1.98869	6.79	26.6717	7.49	6.30333		maternal effect embryo arrest protein
AT2G05380	13	.	-1.69407	.	.	1.97063	678.468	2611.85	727.901	832.352	GRP3S	glycine-rich protein 3 short isoform
AT2G15390	13	.	-2.18304	.	.	1.89751	12.1967	46.2977	10.4363	9.93567	FUT4	fucosyltransferase 4
AT2G16900	13	.	-1.92083	.	.	1.97325	10.0987	44.9447	10.9993	11.1097		phospholipase-like protein (PEARLI 4) family protein
AT2G20720	13	.	-2.34334	.	.	2.38076	1.42067	7.37533	1.09667	1.443		Pentatricopeptide repeat (PPR) superfamily protein
AT2G21640	13	.	-2.23875	.	.	2.31735	19.634	97.2077	16.99	20.0867		marker for oxidative stress response protein
AT2G22470	13	.	-1.95835	.	.	2.03496	10.815	43.8993	8.367	11.0687	AGP2	arabinogalactan protein 2
AT2G26400	13	.	-2.35598	.	.	2.53409	3.737	22.051	4.40933	4.294	ARD3	acireductone dioxygenase 3
AT2G29150	13	.	-3.58117	.	.	3.778	0.380667	5.54367	0.673333	0.438		NAD(P)-binding Rossmann-fold superfamily protein
AT2G29420	13	.	-2.23169	.	.	2.7964	19.6647	135.313	23.9847	28.3267	GSTU7	glutathione S-transferase tau 7
AT2G29720	13	.	-1.98894	.	.	2.10238	8.52833	36.389	7.89267	8.919	CTF2B	FAD/NAD(P)-binding oxidoreductase family protein
AT2G30766	13	.	-1.26638	.	.	2.095	5.21467	34.0037	5.54667	7.82833		hypothetical protein
AT2G31865	13	.	-2.6204	.	.	2.39181	5.05433	26.7143	5.69833	4.14	PARG2	poly(ADP-ribose) glycohydrolase 2
AT2G32020	13	.	-3.35632	.	.	3.41927	0.585	6.56767	0.479	0.621		Acyl-CoA N-acyltransferases (NAT) superfamily protein
AT2G32030	13	.	-2.47819	.	.	2.07463	2.44233	10.2243	1.713	1.73967		Acyl-CoA N-acyltransferases (NAT) superfamily protein
AT2G36750	13	.	-3.57399	.	.	5.10512	0.113	3.78267	0.145	0.300333	UGT73C1	UDP-glucosyl transferase 73C1
AT2G36950	13	.	-1.9092	.	.	2.01979	10.1397	40.7987	9.41267	10.681		Heavy metal transport/detoxification superfamily protein
AT2G37430	13	.	-2.93276	.	.	3.29247	0.887	8.72667	0.683	1.09433	ZAT11	C2H2 and C2HC zinc fingers superfamily protein
AT2G37760	13	.	-2.05257	.	.	1.90135	10.0417	38.18	7.704	8.945	AKR4C8	NAD(P)-linked oxidoreductase superfamily protein
AT2G37970	13	.	-2.03618	.	.	2.30069	21.8967	107.114	23.7923	25.5713	SOUL-1	SOUL heme-binding family protein
AT2G38860	13	.	-2.18235	.	.	2.71871	23.4223	151.004	28.2023	34.1787	YLS5	Class I glutamine amidotransferase-like superfamily protein
AT2G40095	13	.	-1.72815	.	.	2.00978	4.30267	17.1153	3.89067	5.04767		Alpha/beta hydrolase related protein
AT2G40340	13	.	-2.28455	.	.	2.12647	3.878	17.0487	2.59	3.46367	DREB2C	Integrase-type DNA-binding superfamily protein
AT2G41100	13	.	-1.9068	.	.	1.67868	176.203	556.114	131.529	146.051	TCH3	Calcium-binding EF hand family protein
AT2G45760	13	.	-2.43176	.	.	3.20207	0.607333	5.50767	0.408333	0.991333	BAP2	BON association protein 2
AT2G47130	13	.	-1.71127	.	.	2.68328	5.246	33.362	7.77167	9.93367	SDR3	NAD(P)-binding Rossmann-fold superfamily protein
AT2G47550	13	.	-3.6977	.	.	2.96145	0.650333	5.043	0.239333	0.377333		Plant invertase/pectin methylesterase inhibitor superfamily
AT3G01600	13	.	-2.82949	.	.	4.03358	0.398667	6.44967	0.464667	0.889333	NAC044	NAC domain containing protein 44
AT3G01830	13	.	-1.86057	.	.	1.91544	8.2	31.3127	6.20967	7.16433		Calcium-binding EF-hand family protein
AT3G04000	13	.	-2.45413	.	.	1.98649	3.998	15.7737	3.442	2.79467		NAD(P)-binding Rossmann-fold superfamily protein
AT3G04220	13	.	-3.64398	.	.	3.49318	0.340667	4.07633	0.371333	0.297333		Disease resistance protein (TIR-NBS-LRR class) family
AT3G08970	13	.	-2.2511	.	.	2.4032	1.401	7.34867	1.183	1.50733	ATERDJ3A	DNAJ heat shock N-terminal domain-containing protein
AT3G09010	13	.	-2.37047	.	.	2.94087	2.56233	19.547	2.81267	3.72667		Protein kinase superfamily protein
AT3G10500	13	.	-2.38872	.	.	2.52309	4.281	24.434	4.22667	4.588	NAC053	NAC domain containing protein 53
AT3G13080	13	.	-2.12459	.	.	2.44228	6.07533	32.4877	6.56633	7.24967	ABCC3	multidrug resistance-associated protein 3
AT3G14620	13	.	-1.95537	.	.	2.30603	22.5147	110.526	22.6203	28.0007	CYP72A8	cytochrome P450, family 72, subfamily A, polypeptide 8
AT3G21780	13	.	-2.5072	.	.	2.1225	2.59167	11.3257	1.83767	1.925	UGT71B6	UDP-glucosyl transferase 71B6
AT3G22060	13	.	-2.10644	.	.	2.0967	8.594	36.476	7.58833	8.261		Receptor-like protein kinase-related family protein
AT3G22370	13	.	-2.03839	.	.	2.43033	22.424	120.019	25.437	28.6807	AOX1A	alternative oxidase 1A
AT3G22910	13	.	-2.65253	.	.	2.59566	1.079	6.47333	0.678667	0.995667		ATPase E1-E2 type family protein / haloacid dehalogenase-like hydrolase family protein
AT3G23230	13	.	-2.134	.	.	2.83502	1.48033	10.5287	1.51133	2.25733	TDR1	Integrase-type DNA-binding superfamily protein
AT3G23240	13	.	-2.43721	.	.	2.70062	2.294	14.8143	1.86267	2.624	ERF1	ethylene response factor 1
AT3G25490	13	.	-5.9658	.	.	9.56917	0	2.84167	0	0.0353333		Protein kinase family protein
AT3G25610	13	.	-2.25272	.	.	2.51259	4.73833	26.8637	4.37767	5.521		ATPase E1-E2 type family protein / haloacid dehalogenase-like hydrolase family protein
AT3G26200	13	.	-1.97235	.	.	1.88753	11.6613	42.8543	10.2333	10.732	CYP71B22	cytochrome P450, family 71, subfamily B, polypeptide 22
AT3G26210	13	.	-1.78128	.	.	1.9782	8.41033	32.9913	7.54033	9.423	CYP71B23	cytochrome P450, family 71, subfamily B, polypeptide 23
AT3G27630	13	.	-2.51811	.	.	2.57067	0.919	5.76433	0.943667	1.03233		cyclin-dependent kinase inhibitor SMR3-like protein
AT3G28580	13	.	-2.65212	.	.	2.74215	1.99233	13.35	1.86333	2.052		P-loop containing nucleoside triphosphate hydrolases superfamily protein
AT3G28930	13	.	-1.62672	.	.	2.06556	81.0213	338.565	101.604	105.723	AIG2	AIG2-like (avirulence induced gene) family protein
AT3G29250	13	.	-3.24352	.	.	2.84039	1.03367	6.88533	1.03	0.837333	SDR4	NAD(P)-binding Rossmann-fold superfamily protein
AT3G41762	13	.	-3.15582	.	.	3.66463	0.487667	6.26567	0.846	0.673667		hypothetical protein
AT3G44830	13	.	-6.23951	.	.	7.9163	0.00966667	3.87667	0.0346667	0.039		Lecithin:cholesterol acyltransferase family protein
AT3G46090	13	.	-2.21377	.	.	2.25012	4.37367	20.887	3.627	4.34567	ZAT7	C2H2 and C2HC zinc fingers superfamily protein
AT3G46660	13	.	-3.08478	.	.	2.33453	2.63167	13.1293	2.18667	1.49633	UGT76E12	UDP-glucosyl transferase 76E12
AT3G47780	13	.	-2.59237	.	.	2.57966	1.655	9.868	1.499	1.59967	ABCA7	ABC2 homolog 6
AT3G48020	13	.	-2.65569	.	.	2.38003	2.23367	11.6017	1.73	1.77333		hypothetical protein
AT3G50480	13	.	-1.97831	.	.	2.11847	48.8247	210.48	43.729	52.4147	HR4	homolog of RPW8 4
AT3G53150	13	.	-5.12977	.	.	5.56639	0.0553333	2.831	0.0833333	0.0636667	UGT73D1	UDP-glucosyl transferase 73D1
AT3G54640	13	.	-1.70981	.	.	1.95592	41.8797	161.408	44.7563	48.432	TSA1	tryptophan synthase alpha chain
AT3G62150	13	.	-2.16275	.	.	2.06541	4.40067	18.3223	4.146	4.00367	ABCB21	P-glycoprotein 21
AT4G04490	13	.	-2.61629	.	.	2.83122	2.296	16.2893	2.201	2.62167	CRK36	cysteine-rich RLK (RECEPTOR-like protein kinase) 36
AT4G06746	13	.	-1.53909	.	.	1.99551	10.3697	41.0287	9.60767	13.9663	RAP2.9	related to AP2 9
AT4G11370	13	.	-2.19666	.	.	1.97912	6.61533	26.093	4.29	5.50967	RHA1A	RING-H2 finger A1A
AT4G11890	13	.	-2.19299	.	.	2.2529	11.7177	56.5863	9.49167	12.383	ARCK1	Protein kinase superfamily protein
AT4G13180	13	.	-1.95502	.	.	2.69915	10.959	70.593	14.797	17.8913		NAD(P)-binding Rossmann-fold superfamily protein
AT4G14365	13	.	-1.70771	.	.	1.92754	36.781	138.759	39.8573	41.6903	XBAT34	hypothetical protein
AT4G16820	13	.	-3.96101	.	.	4.43709	0.207667	4.56267	0.400667	0.296	PLA-I{beta]2	alpha/beta-Hydrolases superfamily protein
AT4G18250	13	.	-2.46619	.	.	2.99956	1.06167	8.52233	1.19233	1.46667		receptor Serine/Threonine kinase-like protein
AT4G18253	13	.	-2.05367	.	.	2.59545	6.17267	37.2357	8.68767	8.71967		receptor Serine/Threonine kinase-like protein
AT4G18360	13	.	-3.23511	.	.	2.77644	1.22067	8.23533	0.738	0.840667	GOX3	Aldolase-type TIM barrel family protein
AT4G19810	13	.	-2.4749	.	.	1.94951	5.23933	19.9587	4.73633	3.55567	ChiC	Glycosyl hydrolase family protein with chitinase insertion domain-containing protein
AT4G19880	13	.	-1.90184	.	.	1.94939	25.454	97.7453	23.8197	25.7997		Glutathione S-transferase family protein
AT4G20000	13	.	-2.73292	.	.	3.17351	0.439667	4.18967	0.203667	0.576333		VQ motif-containing protein
AT4G20830	13	.	-2.03883	.	.	1.83639	63.108	223.595	45.845	53.313		FAD-binding Berberine family protein
AT4G21120	13	.	-3.31076	.	.	2.593	0.825	5.348	0.578667	0.495667	AAT1	amino acid transporter 1
AT4G22530	13	.	-1.75128	.	.	1.93925	6.84567	27.867	6.707	7.59867		S-adenosyl-L-methionine-dependent methyltransferases superfamily protein
AT4G22710	13	.	-1.78146	.	.	2.11943	5.65733	24.4667	5.01833	6.98533	CYP706A2	cytochrome P450, family 706, subfamily A, polypeptide 2
AT4G23190	13	.	-2.4198	.	.	2.28214	4.84567	24.335	4.35133	4.601	CRK11	cysteine-rich RLK (RECEPTOR-like protein kinase) 11
AT4G25380	13	.	-4.12605	.	.	4.16526	0.171333	3.19867	0.0626667	0.141667	SAP10	stress-associated protein 10
AT4G28390	13	.	-2.09668	.	.	2.13309	4.11533	18.0587	4.47533	4.22267	AAC3	ADP/ATP carrier 3
AT4G28460	13	.	-3.38341	.	.	6.66051	0.0226667	4.38333	0.0276667	0.375		transmembrane protein
AT4G33050	13	.	-1.68174	.	.	2.01029	31.2183	124.956	28.601	38.4753	EDA39	calmodulin-binding family protein
AT4G33540	13	.	-2.27643	.	.	2.11222	23.6767	102.056	21.9537	20.944		metallo-beta-lactamase family protein
AT4G35180	13	.	-2.59776	.	.	3.07265	0.588667	4.93367	0.343	0.767	LHT7	LYS/HIS transporter 7
AT4G36990	13	.	-2.01082	.	.	1.89415	19.022	70.0767	17.2043	17.0757	HSF4	heat shock factor 4
AT4G37010	13	.	-3.06401	.	.	2.59408	1.36267	8.36367	0.637333	1.03267	CEN2	centrin 2
AT4G38540	13	.	-2.22416	.	.	2.26014	11.6173	55.3157	12.4193	11.579		FAD/NAD(P)-binding oxidoreductase family protein
AT5G03890	13	.	-2.83168	.	.	2.46238	1.46967	8.1	1.10133	1.05867		hypothetical protein
AT5G12930	13	.	-2.33961	.	.	2.09623	2.553	10.9657	2.20333	2.118		inactive rhomboid protein
AT5G13320	13	.	-2.14172	.	.	2.15247	3.706	16.0837	2.974	3.60067	PBS3	Auxin-responsive GH3 family protein
AT5G13370	13	.	-1.93551	.	.	1.95938	5.40767	20.9013	4.86467	5.391		Auxin-responsive GH3 family protein
AT5G16970	13	.	-1.72435	.	.	1.83198	64.5833	227.782	62.8283	67.8433	AER	alkenal reductase
AT5G17380	13	.	-2.05945	.	.	2.20524	29.13	133.152	29.3333	31.4413		Thiamine pyrophosphate dependent pyruvate decarboxylase family protein
AT5G18270	13	.	-2.83839	.	.	2.58395	1.87733	11.0577	0.97	1.60033	ANAC087	NAC domain containing protein 87
AT5G22520	13	.	-2.28403	.	.	2.50098	3.70767	21.121	2.72	4.161		hypothetical protein
AT5G22530	13	.	-3.19914	.	.	3.08179	0.618333	5.26533	0.891333	0.595333		hypothetical protein
AT5G24110	13	.	-3.27111	.	.	3.17372	0.912333	8.09967	1.277	0.788	WRKY30	WRKY DNA-binding protein 30
AT5G25260	13	.	-2.47386	.	.	2.46652	1.48933	8.317	0.895	1.43067		SPFH/Band 7/PHB domain-containing membrane-associated protein family
AT5G25930	13	.	-2.28865	.	.	2.48311	3.71533	20.6037	3.558	4.117		kinase family with leucine-rich repeat domain-containing protein
AT5G26340	13	.	-2.17078	.	.	1.95338	54.674	209.834	41.049	45.8597	MSS1	Major facilitator superfamily protein
AT5G27760	13	.	-2.02444	.	.	2.28517	83.9063	406.653	92.702	98.3473		Hypoxia-responsive family protein
AT5G36970	13	.	-4.70924	.	.	5.97829	0.0736667	4.597	0.0796667	0.186333	NHL25	NDR1/HIN1-like 25
AT5G37840	13	.	-3.53278	.	.	5.33105	0.0626667	2.726	0.0516667	0.198333		plastid movement impaired protein
AT5G38650	13	.	-2.1286	.	.	1.8129	19.8883	69.5277	18.941	15.5513		Proteasome maturation factor UMP1
AT5G39670	13	.	-1.74367	.	.	2.18544	8.89633	40.4547	9.909	11.712		Calcium-binding EF-hand family protein
AT5G40990	13	.	-6.09479	.	.	5.65467	0.065	3.88367	0.0173333	0.0426667	GLIP1	GDSL lipase 1
AT5G42010	13	.	-2.69817	.	.	2.69761	0.893333	5.868	1.07167	0.872		Transducin/WD40 repeat-like superfamily protein
AT5G43420	13	.	-1.94116	.	.	2.08826	2.91467	12.3417	2.005	3.17067		RING/U-box superfamily protein
AT5G43450	13	.	-1.9293	.	.	2.17422	10.878	48.136	12.1043	12.4417		2-oxoglutarate (2OG) and Fe(II)-dependent oxygenase superfamily protein
AT5G48540	13	.	-1.61126	.	.	2.23775	8.52033	40.0233	9.74633	12.805		receptor-like protein kinase-related family protein
AT5G50200	13	.	-1.84635	.	.	1.88929	15.728	58.8017	15.0267	16.0327	WR3	nitrate transmembrane transporter
AT5G50760	13	.	.	.	.	3.32166	0.711	7.19467	0.434333	1.323		SAUR-like auxin-responsive protein family
AT5G51070	13	.	-2.10771	.	.	1.78381	55.1257	188.047	47.066	42.956	ERD1	Clp ATPase
AT5G51830	13	.	-2.06055	.	.	2.20014	17.2693	79.0437	19.9	18.665		pfkB-like carbohydrate kinase family protein
AT5G54100	13	.	-1.74905	.	.	2.10423	6.22833	26.5837	6.80433	7.79467		SPFH/Band 7/PHB domain-containing membrane-associated protein family
AT5G57220	13	.	-2.5527	.	.	2.53312	4.469	25.742	4.52633	4.24667	CYP81F2	cytochrome P450, family 81, subfamily F, polypeptide 2
AT5G59220	13	.	-2.85458	.	.	2.18372	5.18133	23.3243	4.524	3.182	HAI1	PP2C protein (Clade A protein phosphatases type 2C)
AT5G60800	13	.	-1.68603	.	.	2.22008	8.156	36.3633	8.64267	10.9117		Heavy metal transport/detoxification superfamily protein
AT5G61820	13	.	-2.20835	.	.	2.27025	38.0107	181.554	38.746	38.767		stress up-regulated Nod 19 protein
AT5G62150	13	.	-2.75105	.	.	2.54375	2.53	14.817	2.20367	2.082		peptidoglycan-binding LysM domain-containing protein
AT5G63790	13	.	-2.06653	.	.	2.22722	39.834	185.076	34.4557	43.3643	NAC102	NAC domain containing protein 102
AT5G64230	13	.	-2.0515	.	.	2.7457	2.987	19.898	3.68	4.732		1,8-cineole synthase
AT5G64510	13	.	-2.21532	.	.	2.89535	0.911333	6.73233	0.843333	1.44567	TIN1	tunicamycin induced protein
AT5G64810	13	.	-2.08022	.	.	2.44349	2.402	13.0457	2.46733	2.971	WRKY51	WRKY DNA-binding protein 51
AT1G02620	14	.	.	-3.15938	.	.	1.091	0.553	0.493333	0.0993333		Ras-related small GTP-binding family protein
AT1G02640	14	.	.	-1.30805	.	.	11.485	6.577	6.18767	4.67767	BXL2	beta-xylosidase 2
AT1G04180	14	.	.	.	.	-2.3911	0.902	0.174	0.483667	0.443667	YUC9	YUCCA 9
AT1G06520	14	.	.	-1.39795	-1.80239	.	1.16433	0.664333	0.311333	0.417	GPAT1	glycerol-3-phosphate acyltransferase 1
AT1G08090	14	.	.	.	.	-1.67806	1.46933	0.454333	1.06233	0.484333	NRT2:1	nitrate transporter 2:1
AT1G12710	14	.	.	-1.10855	.	.	48.267	28.808	32.1777	22.381	PP2-A12	phloem protein 2-A12
AT1G14250	14	.	.	-1.11751	.	-1.51044	171.208	59.46	111.258	78.809		GDA1/CD39 nucleoside phosphatase family protein
AT1G23050	14	.	.	-1.34635	.	.	9.97367	4.51167	5.68767	4.00567		hydroxyproline-rich glycoprotein family protein
AT1G30250	14	.	.	.	.	-1.14998	52.1483	23.1983	32.2987	34.8513		hypothetical protein
AT1G30280	14	.	.	.	.	-1.03418	35.9473	17.3343	20.903	21.2617		Chaperone DnaJ-domain superfamily protein
AT1G49130	14	.	.	-1.43634	-1.30277	-1.22749	34.611	14.8877	14.1163	12.925	BBX17	B-box type zinc finger protein with CCT domain-containing protein
AT1G53830	14	.	.	-1.33615	.	.	3.21933	1.10933	1.80033	1.27733	PME2	pectin methylesterase 2
AT1G64380	14	.	.	.	.	-1.21282	11.3377	4.81633	6.79533	7.52567		Integrase-type DNA-binding superfamily protein
AT1G67265	14	.	.	-1.73563	.	-1.52083	9.62467	3.50733	4.78267	2.84567	RTFL21	ROTUNDIFOLIA like 21
AT1G67910	14	.	.	-1.03981	.	.	11.8967	7.22067	6.62633	5.72267		hypothetical protein
AT1G68190	14	.	.	-1.00586	.	-1.18039	44.204	18.932	29.701	22.3593	BBX27	B-box zinc finger family protein
AT1G68520	14	.	.	-1.23486	-1.04308	.	252.579	133.46	122.503	107.217	BBX14	B-box type zinc finger protein with CCT domain-containing protein
AT2G26710	14	.	.	-1.29235	.	-1.65314	4.241	1.337	2.73933	1.73	BAS1	Cytochrome P450 superfamily protein
AT2G29300	14	.	.	-1.80754	-1.29913	-1.55083	23.273	7.725	9.44	6.52033		NAD(P)-binding Rossmann-fold superfamily protein
AT2G29670	14	.	.	-1.03599	.	-1.08752	86.344	40.34	43.2643	42.06		Tetratricopeptide repeat (TPR)-like superfamily protein
AT2G29680	14	.	.	.	.	-1.09333	4.81933	2.35867	2.93633	3.53567	CDC6	cell division control 6
AT2G36050	14	.	.	-1.80973	.	-1.34992	15.53	5.98033	8.044	4.40567	OFP15	ovate family protein 15
AT2G37950	14	.	.	-1.01179	.	.	8.833	5.747	6.65033	4.363		RING/FYVE/PHD zinc finger superfamily protein
AT2G41800	14	.	.	-1.29896	.	-1.56246	7.177	2.459	5.40433	2.87333		imidazolonepropionase (Protein of unknown function, DUF642)
AT2G42170	14	.	.	.	.	-1.09156	4.88267	2.49467	4.069	3.42367		Actin family protein
AT2G42870	14	.	.	-1.44129	.	-1.19455	24.5323	10.545	14.2213	9.125	PAR1	phy rapidly regulated 1
AT3G05936	14	.	.	-1.20379	.	.	14.7987	7.636	8.65767	6.493		hypothetical protein
AT3G13750	14	.	.	-1.3668	-1.1937	-1.10937	198.44	91.387	86.75	76.8297	BGAL1	beta galactosidase 1
AT3G27400	14	.	.	.	.	-1.27991	19.671	8.36733	15.1247	10.9303		Pectin lyase-like superfamily protein
AT3G49340	14	.	.	-1.63711	.	.	8.46467	3.80967	6.878	2.68		Cysteine proteinases superfamily protein
AT3G52310	14	.	.	-1.84659	.	.	0.848	0.534333	0.395	0.222667	ABCG27	ABC transporter G family member 27
AT3G55500	14	.	.	-1.24901	.	.	27.509	16.6557	17.3367	11.4423	EXPA16	expansin A16
AT4G06534	14	.	.	-1.22411	.	-1.40925	4.82567	1.829	2.99433	2.06433		transmembrane protein
AT4G06536	14	.	.	.	.	-1.63484	5.35733	1.82067	2.86467	3.30633		SPla/RYanodine receptor (SPRY) domain-containing protein
AT4G20140	14	.	.	.	.	-2.07362	0.440667	0.104333	0.347	0.339333	GSO1	Leucine-rich repeat transmembrane protein kinase
AT4G23870	14	.	.	-1.16552	-1.00913	.	59.4947	32.5583	29.5667	26.5597		hypothetical protein
AT4G25490	14	.	.	.	-1.31262	-1.20443	20.1467	8.735	8.16967	10.094	CBF1	C-repeat/DRE binding factor 1
AT4G25835	14	.	.	.	-1.01395	.	4.63033	2.48867	2.29067	2.77333		P-loop containing nucleoside triphosphate hydrolases superfamily protein
AT4G29905	14	.	.	-1.08601	.	.	396.718	218.01	211.06	186.755		hypothetical protein
AT4G37240	14	.	.	-1.38701	.	-1.18677	20.2837	8.68633	13.4153	7.60333		HTH-type transcriptional regulator
AT4G38400	14	.	.	-1.04996	.	.	11.8723	6.855	11.247	5.69433	EXLA2	expansin-like A2
AT5G04190	14	.	.	-1.1761	.	.	2.00933	0.895	1.344	0.886	PKS4	phytochrome kinase substrate 4
AT5G19190	14	.	.	-1.01869	.	.	45.9363	28.0033	30.1277	22.7653		hypothetical protein
AT5G25190	14	.	.	.	.	-1.06222	30.9373	14.71	25.569	17.0243	ESE3	Integrase-type DNA-binding superfamily protein
AT5G25240	14	.	.	-1.10969	.	.	10.6857	6.86667	7.283	4.792		stress induced protein
AT5G26260	14	.	.	-1.32028	.	.	1.833	0.984667	1.542	0.727		TRAF-like family protein
AT5G44260	14	.	.	-1.28787	.	-1.28789	16.385	6.568	9.629	6.76		Zinc finger C-x8-C-x5-C-x3-H type family protein
AT5G51990	14	.	.	.	.	-2.12467	2.494	0.641333	0.578333	1.15067	CBF4	C-repeat-binding factor 4
AT5G59080	14	.	.	.	.	-1.07226	16.091	7.73567	9.45533	9.44733		hypothetical protein
ATCG00340	14	.	.	.	.	-1.14332	26.185	11.7543	18.7083	14.095	PSAB	Photosystem I, PsaA/PsaB protein
ATCG00350	14	.	.	.	.	-1.12003	17.349	7.885	12.495	9.05833	PSAA	Photosystem I, PsaA/PsaB protein
AT1G09350	15	.	2.05966	.	.	-1.55741	24.009	8.35933	45.346	36.1707	GolS3	galactinol synthase 3
AT1G13650	15	.	2.03505	.	.	-1.49803	17.3013	6.21767	25.2517	24.9313		hypothetical protein
AT1G14700	15	.	1.61623	.	.	-1.46342	16.088	5.671	18.7767	17.4277	PAP3	purple acid phosphatase 3
AT1G20190	15	.	1.69512	.	.	-1.20109	59.508	26.1497	93.8487	83.5267	EXPA11	expansin 11
AT1G23080	15	.	1.38439	.	.	-1.02692	65.8593	32.1983	94.8327	82.047	PIN7	Auxin efflux carrier family protein
AT1G26945	15	.	1.66021	.	.	-1.79554	26.127	7.29967	28.0777	23.275	KDR	basic helix-loop-helix (bHLH) DNA-binding superfamily protein
AT1G29395	15	.	1.4253	.	.	-1.48135	425.344	151.457	482.574	398.982	COR413IM1	COLD REGULATED 314 INNER MEMBRANE 1
AT1G29430	15	.	.	.	.	-1.58297	11.2187	3.61233	13.142	10.034		SAUR-like auxin-responsive protein family
AT1G29450	15	.	1.43024	.	.	-1.68291	13.3893	4.012	15.7717	11.0463		SAUR-like auxin-responsive protein family
AT1G29460	15	.	.	.	.	-2.10027	16.6217	3.69933	18.577	12.3393		SAUR-like auxin-responsive protein family
AT1G68238	15	.	1.92573	.	.	.	29.2247	14.7487	46.14	56.8717		transmembrane protein
AT1G73600	15	.	1.77483	.	.	.	235.057	122.453	347.362	410.217		S-adenosyl-L-methionine-dependent methyltransferases superfamily protein
AT1G74670	15	.	2.09483	.	.	-2.15039	150.454	33.6007	188.254	141.533	GASA6	Gibberellin-regulated family protein
AT2G05070	15	.	1.33054	.	.	-1.23901	3139.08	1322.07	3530.14	3262.85	LHCB2.2	photosystem II light harvesting complex protein 2.2
AT2G05100	15	.	1.27758	.	.	-1.19271	2147.68	917.594	2459.69	2174.25	LHCB2.1	photosystem II light harvesting complex protein 2.1
AT2G20750	15	.	2.3989	1.14109	1.06121	-1.22734	7.22167	3.029	14.9713	15.9107	EXPB1	expansin B1
AT2G34430	15	.	1.3506	.	.	-1.46931	3293.32	1182.9	3677.36	2958.81	LHB1B1	light-harvesting chlorophyll-protein complex II subunit B1
AT2G40610	15	.	2.1027	.	.	-1.41422	50.5377	18.7773	99.0727	79.6083	EXPA8	expansin A8
AT2G40670	15	.	1.49698	.	.	-1.29161	11.0203	3.91467	13.8883	11.6947	RR16	response regulator 16
AT3G02885	15	.	2.10186	.	.	-1.7423	6.288	1.713	6.18133	7.888	GASA5	GAST1 protein homolog 5
AT3G12610	15	.	1.23127	.	.	-1.03712	61.6263	29.8763	85.6857	68.8023	DRT100	Leucine-rich repeat (LRR) family protein
AT3G27690	15	.	1.78633	.	.	-1.37833	799.898	303.308	1142.16	1032.88	LHCB2.3	photosystem II light harvesting complex protein 2.3
AT3G50685	15	.	1.41485	.	.	-1.0997	223.482	103.536	272.826	271.334		anti-muellerian hormone type-2 receptor
AT3G53250	15	.	2.20363	.	.	.	1.951	0.677333	4.89767	3.47267		SAUR-like auxin-responsive protein family
AT3G55240	15	.	1.60149	.	.	-1.32184	27.906	11.1293	33.9957	33.0343		Plant protein 1589 of unknown function
AT4G12980	15	.	1.3712	.	.	-1.24725	28.5237	11.9087	36.0243	30.3403		Auxin-responsive family protein
AT4G16983	15	.	1.90787	.	.	.	113.853	60.6367	161.134	223.839		hypothetical protein
AT4G19170	15	.	1.2472	.	.	-1.1545	94.0483	41.9483	117.233	97.851	NCED4	nine-cis-epoxycarotenoid dioxygenase 4
AT4G25480	15	.	2.06769	.	.	-1.15977	19.8763	8.75333	31.9563	36.2927	DREB1A	dehydration response element B1A
AT4G38840	15	.	1.80473	.	.	-1.14125	97.4337	43.533	134.619	150.755		SAUR-like auxin-responsive protein family
AT4G38850	15	.	1.96561	.	.	.	9.36133	3.916	15.9787	15.533	SAUR15	SAUR-like auxin-responsive protein family
AT4G38860	15	.	2.18579	.	1.0225	-1.23175	27.8397	11.7427	56.7243	52.795		SAUR-like auxin-responsive protein family
AT5G01015	15	.	1.83894	.	.	-1.75988	30.4203	8.72467	33.9953	31.101		transmembrane protein
AT5G02760	15	.	2.27674	.	1.0397	-1.79417	11.9527	3.343	24.6867	16.3393		Protein phosphatase 2C family protein
AT5G15770	15	.	2.8106	.	.	.	8.484	1.65433	11.942	13.588	GNA1	glucose-6-phosphate acetyltransferase 1
AT5G18020	15	.	2.88634	.	.	-2.85458	18.409	2.373	18.3343	18.2943	SAUR20	SAUR-like auxin-responsive protein family
AT5G18030	15	.	1.75992	.	.	-1.82977	16.3757	4.417	18.9237	15.2087		SAUR-like auxin-responsive protein family
AT5G18050	15	.	2.11229	.	.	-2.64881	10.079	1.45133	9.58467	6.78767	SAUR22	SAUR-like auxin-responsive protein family
AT5G18080	15	.	1.60864	.	.	-1.68526	23.507	7.04367	25.3727	21.802	SAUR24	SAUR-like auxin-responsive protein family
AT5G24105	15	.	1.69931	.	.	.	8.472	3.01267	10.5157	10.2587	AGP41	arabinogalactan protein 41
AT5G25460	15	.	1.18115	.	.	-1.13214	209.809	95.1517	262.094	211.817	DGR2	transmembrane protein, putative (Protein of unknown function, DUF642)
AT5G35490	15	.	1.44528	.	.	-1.06145	47.1013	22.2837	60.398	60.004	MRU1	mto 1 responding up 1
AT5G39860	15	.	2.136	.	.	-2.14728	11.4327	2.40767	9.62333	11.0667	PRE1	basic helix-loop-helix (bHLH) DNA-binding family protein
AT5G54270	15	.	1.49362	.	.	-1.17354	4731.21	2085.61	5650.37	5761.59	LHCB3	light-harvesting chlorophyll B-binding protein 3
AT5G57760	15	.	1.53173	.	.	-1.06407	30.9437	14.3343	59.8443	41.849		hypothetical protein
AT5G64770	15	.	1.63464	.	.	-1.05667	235.469	112.23	337.205	342.906	RGF9	root meristem growth factor
AT1G05575	16	.	-2.0217	.	.	1.54638	13.281	38.5267	7.70467	9.17833		transmembrane protein
AT1G06620	16	.	-2.18133	.	.	.	9.39967	21.9883	4.468	4.73833		2-oxoglutarate (2OG) and Fe(II)-dependent oxygenase superfamily protein
AT1G09970	16	.	-1.9114	.	.	1.45192	44.471	120.676	32.061	31.998	LRR XI-23	Leucine-rich receptor-like protein kinase family protein
AT1G10140	16	.	-2.45026	.	.	1.71627	19.5117	63.6013	11.7517	11.382		Uncharacterized conserved protein UCP031279
AT1G14200	16	.	-1.92193	.	.	1.43961	21.702	58.5687	15.8717	15.182		RING/U-box superfamily protein
AT1G15125	16	.	-2.57315	.	.	1.94737	91.064	347.849	65.4813	57.5007		S-adenosyl-L-methionine-dependent methyltransferases superfamily protein
AT1G15670	16	.	-2.61607	-1.18174	.	1.47324	8.05667	22.2567	3.77833	3.59033		Galactose oxidase/kelch repeat superfamily protein
AT1G17020	16	.	-2.21829	.	.	1.73553	3.16733	10.4693	1.62667	2.24533	SRG1	senescence-related gene 1
AT1G21100	16	.	-2.30911	.	.	1.75594	6.391	21.5477	4.05533	4.195	IGMT1	O-methyltransferase family protein
AT1G22890	16	.	-2.31644	.	.	1.61109	41.2893	125.513	30.7193	24.7253		transmembrane protein
AT1G23710	16	.	-2.25227	.	-1.03234	1.60453	27.5817	83.1907	13.4807	17.122		hypothetical protein (DUF1645)
AT1G25560	16	.	-2.03298	-1.14232	.	.	59.305	111.814	34.067	26.8407	TEM1	AP2/B3 transcription factor family protein
AT1G27730	16	.	-2.13373	.	.	1.20601	61.3933	140.57	24.2603	31.415	STZ	salt tolerance zinc finger
AT1G28190	16	.	-1.91459	.	.	1.45021	18.8157	51.0373	11.047	13.2953		hypothetical protein
AT1G30135	16	.	-2.12084	.	.	.	7.21333	16.538	3.34833	3.64133	JAZ8	jasmonate-zim-domain protein 8
AT1G30730	16	.	-3.94799	.	.	2.12637	1.27733	5.516	0.422667	0.322333		FAD-binding Berberine family protein
AT1G32920	16	.	-1.92275	.	.	1.06477	48.8503	101.43	24.9603	26.188		hypothetical protein
AT1G35210	16	.	-2.04002	.	.	1.71081	5.39467	17.6203	3.29033	4.10233		hypothetical protein
AT1G51760	16	.	-2.33634	.	.	1.74392	45.9047	152.247	28.5793	29.6427	IAR3	peptidase M20/M25/M40 family protein
AT1G52690	16	.	-1.98939	.	.	.	4.64233	13.7933	2.589	3.48133	LEA7	Late embryogenesis abundant protein (LEA) family protein
AT1G52890	16	.	-2.6764	.	.	1.62099	35.9203	109.343	17.7743	16.8133	NAC019	NAC domain containing protein 19
AT1G56240	16	.	-2.53374	.	.	.	1.60467	5.49467	0.862	0.881667	PP2-B13	phloem protein 2-B13
AT1G59590	16	.	-1.91656	.	.	1.38387	8.61567	22.383	5.587	5.72833	ZCF37	ZCF37
AT1G63720	16	.	-2.20049	.	.	1.90938	3.537	13.2147	2.298	2.78067		hydroxyproline-rich glycoprotein family protein
AT1G64065	16	.	-2.16726	.	.	1.79493	4.59867	15.8693	3.34433	3.413		Late embryogenesis abundant (LEA) hydroxyproline-rich glycoprotein family
AT1G67920	16	.	-1.84056	.	.	1.50685	15.0913	42.8887	9.92033	11.5757		hypothetical protein
AT1G68440	16	.	-2.41167	-1.04743	.	1.39359	12.207	31.8	7.22733	5.85367		transmembrane protein
AT1G69490	16	.	-2.08489	-1.01807	.	1.10167	12.5267	26.7783	7.61733	6.18533	NAP	NAC-like, activated by AP3/PI
AT1G69880	16	.	-2.67877	.	.	2.25574	2.847	13.532	1.44233	2.03567	TH8	thioredoxin H-type 8
AT1G80820	16	.	-2.58914	.	.	.	2.708	9.48467	1.29267	1.45267	CCR2	cinnamoyl coa reductase
AT1G80840	16	.	-2.31588	.	.	1.56471	46.3987	136.119	18.3907	26.825	WRKY40	WRKY DNA-binding protein 40
AT2G02990	16	.	-2.24968	.	.	1.93675	5.66867	21.5377	3.758	4.426	RNS1	ribonuclease 1
AT2G15880	16	.	-1.97422	-1.147	-1.50304	.	12.8117	23.11	4.485	5.74767		Leucine-rich repeat (LRR) family protein
AT2G23320	16	.	-2.02635	.	.	1.57226	36.4447	107.585	20.9013	25.864	WRKY15	WRKY DNA-binding protein 15
AT2G23810	16	.	-1.59768	.	.	1.21908	88.759	204.896	55.853	66.5233	TET8	tetraspanin8
AT2G24850	16	.	-2.80816	.	.	.	33.4467	117.894	12.322	16.602	TAT3	tyrosine aminotransferase 3
AT2G25735	16	.	-1.81577	.	.	1.07072	13.647	28.4187	6.76633	7.87467		hypothetical protein
AT2G27310	16	.	-1.70391	.	.	1.16263	21.4727	47.7007	13.4707	14.3183		F-box family protein
AT2G27500	16	.	-1.88292	-1.04242	.	.	31.026	57.1817	15.2943	15.5687		Glycosyl hydrolase superfamily protein
AT2G28400	16	.	-1.97702	.	.	1.24332	11.3207	26.611	6.142	6.574		senescence regulator (Protein of unknown function, DUF584)
AT2G30250	16	.	-1.98033	.	.	1.53133	23.298	66.8737	16.444	16.5723	WRKY25	WRKY DNA-binding protein 25
AT2G30360	16	.	-1.79362	.	.	.	17.2897	34.658	9.838	9.79433	SIP4	SOS3-interacting protein 4
AT2G32200	16	.	-1.9152	.	.	.	4.81067	9.41867	1.48267	2.47333		cysteine-rich/transmembrane domain A-like protein
AT2G32210	16	.	-2.21909	.	.	1.84813	8.405	30.032	4.27967	6.30133		cysteine-rich/transmembrane domain A-like protein
AT2G36770	16	.	-3.80777	-1.37301	.	2.45246	1.802	9.81033	0.637333	0.668		UDP-Glycosyltransferase superfamily protein
AT2G37750	16	.	-3.04162	.	.	2.11768	2.297	10.0533	1.66733	1.183		hypothetical protein
AT2G38240	16	.	-2.71444	.	.	2.09764	5.581	23.625	2.044	3.51433		2-oxoglutarate (2OG) and Fe(II)-dependent oxygenase superfamily protein
AT2G38470	16	.	-1.93721	.	.	1.5582	48.7537	142.399	26.8427	36.513	WRKY33	WRKY DNA-binding protein 33
AT2G39030	16	.	-2.89292	-1.46193	.	1.46558	176.481	481.908	94.8463	63.9923	NATA1	Acyl-CoA N-acyltransferases (NAT) superfamily protein
AT2G40000	16	.	-2.98645	-1.82648	-1.83345	1.19448	134.039	304.196	37.6373	37.7057	HSPRO2	ortholog of sugar beet HS1 PRO-1 2
AT2G40140	16	.	-1.69409	.	.	1.11041	38.014	81.6113	19.7253	25.136	CZF1	zinc finger (CCCH-type) family protein
AT2G41640	16	.	-1.95646	.	.	1.23946	5.48	12.8903	2.79733	3.22533		Glycosyltransferase family 61 protein
AT2G43120	16	.	-2.39496	.	.	1.7932	12.5137	43.0747	10.376	8.00067		RmlC-like cupins superfamily protein
AT2G43510	16	.	-2.163	.	.	1.7526	64.2373	214.787	40.0423	47.1117	TI1	trypsin inhibitor protein 1
AT2G47190	16	.	-2.85159	.	.	2.00083	2.43267	9.75267	1.59767	1.31633	MYB2	myb domain protein 2
AT3G01970	16	.	-2.78362	.	.	2.09552	3.49733	14.929	1.77167	2.14133	WRKY45	WRKY DNA-binding protein 45
AT3G02840	16	.	-2.43156	.	.	1.28973	5	12.2307	1.661	2.16867		ARM repeat superfamily protein
AT3G04070	16	.	-2.45611	-1.317	.	.	6.03933	12.7083	2.692	2.50967	NAC047	NAC domain containing protein 47
AT3G04640	16	.	-1.70373	.	.	.	62.3507	122.538	28.9933	36.551		glycine-rich protein
AT3G09020	16	.	-2.09551	.	.	1.78738	8.72967	30.0207	5.42933	6.93167		alpha 1,4-glycosyltransferase family protein
AT3G10320	16	.	-3.73684	.	.	2.45138	0.915667	5.04033	0.366333	0.347		Glycosyltransferase family 61 protein
AT3G10930	16	.	-3.10745	-1.7966	.	1.3555	12.3997	31.589	3.03533	3.49167		hypothetical protein
AT3G11480	16	.	-3.29515	.	.	.	1.673	5.39433	0.790667	0.519333	BSMT1	S-adenosyl-L-methionine-dependent methyltransferases superfamily protein
AT3G13790	16	.	-2.20362	.	.	1.74513	12.7403	42.2317	7.785	9.014	ATBFRUCT1	Glycosyl hydrolases family 32 protein
AT3G21500	16	.	-3.858	.	.	.	2.21733	8.259	0.715667	0.552333	DXPS1	1-deoxy-D-xylulose 5-phosphate synthase 1
AT3G23250	16	.	-2.3374	.	.	.	4.71367	12.3897	1.30867	2.36933	MYB15	myb domain protein 15
AT3G25180	16	.	-2.69441	.	.	.	8.66433	19.102	4.24733	2.86533	CYP82G1	cytochrome P450, family 82, subfamily G, polypeptide 1
AT3G25780	16	.	-1.90029	.	.	.	19.5933	45.2857	8.73167	11.9193	AOC3	allene oxide cyclase 3
AT3G26910	16	.	-2.0655	.	.	1.62226	7.51767	23.1247	5.20567	5.443		hydroxyproline-rich glycoprotein family protein
AT3G49110	16	.	-2.13404	.	.	1.58466	40.6887	121.181	32.6513	27.095	PRXCA	peroxidase CA
AT3G49580	16	.	-2.11096	.	.	1.18065	28.0167	62.9953	18.6057	15.91	LSU1	response to low sulfur 1
AT3G49780	16	.	-2.65091	-1.11009	.	1.56966	11.0973	32.7027	6.312	5.09133	PSK4	phytosulfokine 4 precursor
AT3G50260	16	.	-2.18107	.	.	1.35626	26.3947	67.0763	14.7797	14.381	CEJ1	cooperatively regulated by ethylene and jasmonate 1
AT3G50770	16	.	-2.13972	-1.19241	.	.	28.0457	55.0923	15.2207	12.2397	CML41	calmodulin-like 41
AT3G50930	16	.	-1.85794	.	.	1.55319	16.1483	46.982	9.12167	12.6993	BCS1	cytochrome BC1 synthesi
AT3G52400	16	.	-1.88163	.	.	1.4636	61.5863	168.589	45.3313	44.88	SYP122	syntaxin of plants 122
AT3G53600	16	.	-3.15903	.	.	.	1.09033	4.56967	0.583	0.474		C2H2-type zinc finger family protein
AT3G55970	16	.	-2.23824	.	.	.	11.7453	30.7063	5.34433	6.44733	JRG21	jasmonate-regulated gene 21
AT4G01360	16	.	-2.10453	.	.	.	4.214	11.089	2.23567	2.48833	BPS3	BPS1-like protein
AT4G11280	16	.	-1.92356	.	.	1.17432	33.8767	75.869	17.5607	19.595	ACS6	1-aminocyclopropane-1-carboxylic acid (acc) synthase 6
AT4G13395	16	.	-2.40796	.	.	.	17.8483	39.8243	5.154	7.25433	RTFL12	ROTUNDIFOLIA like 12
AT4G18170	16	.	-3.12454	-1.44592	.	1.69735	4.9	15.7907	2.30233	1.75233	WRKY28	WRKY DNA-binding protein 28
AT4G20860	16	.	-2.21946	.	.	1.58079	12.1653	36.0817	7.537	7.58		FAD-binding Berberine family protein
AT4G21680	16	.	-3.24565	.	.	2.10501	4.222	17.9573	1.897	1.84433	NRT1.8	NITRATE TRANSPORTER 1.8
AT4G21850	16	.	-2.19513	.	.	.	9.93033	22.8703	5.51667	4.82467	MSRB9	methionine sulfoxide reductase B9
AT4G21920	16	.	-2.58796	.	.	1.70455	3.78067	12.373	2.332	1.91733		hypothetical protein
AT4G24340	16	.	-4.00606	.	.	.	1.33267	5.43267	0.491667	0.311333		Phosphorylase superfamily protein
AT4G25810	16	.	-2.55496	.	.	1.77186	4.38267	14.9287	2.19667	2.44167	XTR6	xyloglucan endotransglycosylase 6
AT4G27280	16	.	-1.67964	.	.	.	33.761	61.738	15.472	18.8217		Calcium-binding EF-hand family protein
AT4G28085	16	.	-2.44569	.	.	.	5.68267	14.43	3.337	2.476		transmembrane protein
AT4G37520	16	.	-2.88534	.	.	1.92612	19.2087	72.137	12.2627	9.67467		Peroxidase superfamily protein
AT5G04340	16	.	-2.478	.	.	1.9749	22.2957	87.0647	13.6263	15.263	ZAT6	6
AT5G05340	16	.	-2.87772	.	.	1.8986	4.62667	17.0543	2.11633	2.26033	PRX52	Peroxidase superfamily protein
AT5G05410	16	.	-2.43236	.	-1.02671	1.55252	20.4693	59.6293	10.3973	10.9633	DREB2A	DRE-binding protein 2A
AT5G05600	16	.	-2.41439	.	.	.	71.6653	170.662	33.4307	30.902		2-oxoglutarate (2OG) and Fe(II)-dependent oxygenase superfamily protein
AT5G05730	16	.	-2.06468	.	.	1.74497	41.9723	139.506	29.7583	32.748	ASA1	anthranilate synthase alpha subunit 1
AT5G06860	16	.	-2.14843	.	.	1.51217	22.5413	63.9263	14.0097	14.1173	PGIP1	polygalacturonase inhibiting protein 1
AT5G07010	16	.	-1.96684	.	.	.	18.8637	39.7137	11.157	9.99933	ST2A	sulfotransferase 2A
AT5G10625	16	.	-2.82415	.	.	2.14961	2.30267	10.1557	1.45033	1.37933		flowering-promoting factor-like protein
AT5G10695	16	.	-1.70327	.	.	1.2331	59.8283	139.66	33.052	41.9043		methionyl-tRNA synthetase
AT5G14180	16	.	-2.95677	.	.	.	1.771	5.23467	0.84	0.615667	MPL1	Myzus persicae-induced lipase 1
AT5G19230	16	.	-1.88055	.	.	.	11.7767	28.2003	7.789	7.38133		Glycoprotein membrane precursor GPI-anchored
AT5G38710	16	.	-3.59565	-1.54928	.	2.0772	4.279	17.1997	1.91767	1.358		Methylenetetrahydrofolate reductase family protein
AT5G39580	16	.	-4.08927	.	.	.	1.142	2.79267	0.038	0.138		Peroxidase superfamily protein
AT5G40690	16	.	-2.47908	.	.	1.81117	3.63433	12.711	2.09667	2.24433		histone-lysine N-methyltransferase trithorax-like protein
AT5G46050	16	.	-2.3651	.	.	1.48472	1.83	5.12267	0.818	0.951	PTR3	peptide transporter 3
AT5G46350	16	.	-2.38176	.	.	1.51184	5.66533	16.0547	3.977	2.99967	WRKY8	WRKY DNA-binding protein 8
AT5G54490	16	.	-2.00067	.	.	1.73579	8.23567	27.1797	4.55467	6.56367	PBP1	pinoid-binding protein 1
AT5G56870	16	.	-2.31361	-1.23934	-1.27115	.	5.12367	10.9957	2.12267	2.19033	BGAL4	beta-galactosidase 4
AT5G58350	16	.	-2.29707	.	.	1.66253	9.978	31.314	7.20667	6.254	WNK4	with no lysine (K) kinase 4
AT5G59550	16	.	-1.77954	.	.	.	29.674	57.16	15.8783	16.124	RDUF2	zinc finger (C3HC4-type RING finger) family protein
AT1G05680	17	.	-6.09683	.	.	7.45367	0.455	80.363	0.311	1.11667	UGT74E2	Uridine diphosphate glycosyltransferase 74E2
AT1G07400	17	.	-4.90477	.	.	5.88204	1.74467	100.735	1.18767	3.18533		HSP20-like chaperones superfamily protein
AT1G15520	17	.	-5.33165	.	.	5.81113	1.676	94.8977	1.47767	2.28533	ABCG40	pleiotropic drug resistance 12
AT1G17170	17	.	-5.46718	.	.	6.25906	2.30233	175.878	1.666	3.88267	GSTU24	glutathione S-transferase TAU 24
AT1G17180	17	.	-5.8937	.	.	7.61911	0.414333	77.3653	0.0973333	1.19633	GSTU25	glutathione S-transferase TAU 25
AT1G26380	17	.	-4.767	.	.	5.35584	1.68067	68.5093	1.155	2.47733		FAD-binding Berberine family protein
AT1G32350	17	.	-6.21614	.	.	6.0595	1.34467	89.2243	0.818667	1.159	AOX1D	alternative oxidase 1D
AT1G53540	17	.	-5.70776	.	.	8.8219	0.105667	48.0643	0.038	0.786667		HSP20-like chaperones superfamily protein
AT1G65970	17	.	-5.02244	.	.	5.41382	1.13567	50.3353	0.610333	1.517	TPX2	thioredoxin-dependent peroxidase 2
AT1G66570	17	.	-6.84203	.	.	7.5045	0.274667	46.6437	0.183	0.389667	SUC7	sucrose-proton symporter 7
AT1G66700	17	.	-5.64517	.	.	7.12936	0.644667	91.9067	1.17333	1.79367	PXMT1	S-adenosyl-L-methionine-dependent methyltransferases superfamily protein
AT1G75830	17	.	-6.16496	.	.	9.74799	0.152667	157.258	0	2.13967	LCR67	low-molecular-weight cysteine-rich 67
AT2G04050	17	3.97031	-3.94579	3.01634	.	6.99017	0.247667	30.5113	0.121333	1.92433		MATE efflux family protein
AT2G15490	17	.	-6.15305	.	.	9.13738	0.098	45.8273	0.087	0.594667	UGT73B4	UDP-glycosyltransferase 73B4
AT2G18193	17	2.27549	-4.03985	2.06789	.	6.15106	0.631333	45.7237	0.562667	2.743		P-loop containing nucleoside triphosphate hydrolases superfamily protein
AT2G29460	17	.	-5.00835	.	.	4.9846	4.425	138.915	2.23833	4.21967	GSTU4	glutathione S-transferase tau 4
AT2G29470	17	.	-6.06297	.	.	7.39689	0.417667	69.6217	0.114333	1.037	GSTU3	glutathione S-transferase tau 3
AT2G30770	17	.	-5.94873	.	.	5.67115	2.402	122.025	0.632667	1.94167	CYP71A13	cytochrome P450 family 71 polypeptide
AT2G34500	17	.	-6.37602	.	.	6.15222	0.466	34.1577	0.186667	0.406	CYP710A1	cytochrome P450, family 710, subfamily A, polypeptide 1
AT2G35980	17	.	-5.8292	.	.	6.31747	0.632667	51.0973	0.352333	0.841	YLS9	Late embryogenesis abundant (LEA) hydroxyproline-rich glycoprotein family
AT3G12580	17	.	-4.68264	1.59002	.	6.30467	1.79867	141.428	2.88733	5.396	HSP70	heat shock protein 70
AT3G19615	17	.	-6.51961	.	.	5.9329	0.618333	41.1687	0.239333	0.568333		beta-1,4-xylosidase
AT3G26830	17	.	-5.38024	.	.	5.31781	7.02867	277.537	4.87767	6.543	PAD3	Cytochrome P450 superfamily protein
AT3G28210	17	.	-5.10878	.	.	5.88264	2.22233	128.869	1.03633	3.675	PMZ	zinc finger (AN1-like) family protein
AT3G46080	17	.	-5.19087	.	.	4.97107	3.04967	95.4957	0.598333	2.58333		C2H2-type zinc finger family protein
AT3G46230	17	.	-5.25462	.	.	8.92881	0.12	79.363	0.343667	1.928	HSP17.4	heat shock protein 17.4
AT3G49620	17	.	-5.01885	.	.	4.2105	21.405	392.59	12.897	11.8817	DIN11	2-oxoglutarate (2OG) and Fe(II)-dependent oxygenase superfamily protein
AT4G01870	17	.	-4.63466	.	.	5.04346	10.334	338.657	9.03833	13.3867		tolB protein-like protein
[truncated: 194 more rows]
