# Supplementary material for: A Biostimulant Obtained from the Seaweed Ascophyllum nodosum Protects Arabidopsis thaliana from Severe Oxidative Stress
Source: Int J Mol Sci. 2020 Jan 11;21(2):474. doi: 10.3390/ijms21020474 (PMC7013732; doi:10.3390/ijms21020474)
Supplement: Supplementary file 1 [file ijms-21-00474-s001.zip › Data.S3.xlsx]

## Sheet: description
Notes:
Each sheet contains GO enrichment results for respective combination using GOSeq (FDR < 0.05).
Two tables in each sheet are as follows:
a) A_vs_B A up: GO enrichment from DEGs up-regulated in A (down in B) from A/B comparison
b) A_vs_B B up: GO enrichment from DEGs up-regulated in B (down in A) from A/B comparison
SF+PQ vs. SF+H2O combination had no encriched GO terms, hence no sheet for this combination.

## Sheet: SF+H2O_vs_H2O+H2O.goseq
SF+H2O_vs_H2O+H2O SF+H2O up
category	term	ontology	numDEInCat	numInCat	FDR	gene_ids
SF+H2O_vs_H2O+H2O H2O+H2O up
category	term	ontology	numDEInCat	numInCat	FDR	gene_ids
GO:0080167	response to karrikin	BP	8	118	0.0126271	AT1G06520, AT2G39980, AT3G45060, AT3G57520, AT4G33980, AT4G39070, AT5G20250, AT5G42900
GO:0070413	trehalose metabolism in response to stress	BP	3	8	0.0195515	AT1G23870, AT1G70290, AT2G18700
GO:0030162	regulation of proteolysis	BP	4	23	0.0327141	AT1G80440, AT3G48360, AT4G37610, AT5G63160
GO:0010200	response to chitin	BP	7	116	0.0331779	AT1G75490, AT2G35930, AT3G19580, AT4G37260, AT4G37610, AT4G39070, AT5G59820
GO:0006979	response to oxidative stress	BP	9	225	0.0459721	AT1G72060, AT2G40000, AT3G10020, AT3G30775, AT3G57520, AT4G35770, AT5G20250, AT5G56550, AT5G59820
GO:0003700	transcription factor activity, sequence-specific DNA binding	MF	20	1074	0.0461477	AT1G25550, AT1G49130, AT1G68520, AT1G68840, AT1G74930, AT1G75490, AT2G25900, AT3G07650, AT3G15500, AT3G19580, AT4G25490, AT4G27410, AT4G37260, AT4G39070, AT5G05410, AT5G17490, AT5G28770, AT5G49450, AT5G59820, AT5G61600

## Sheet: SF+PQ_vs_H2O+PQ+.goseq
SF+PQ_vs_H2O+PQ SF+PQ up
category	term	ontology	numDEInCat	numInCat	FDR	gene_ids
GO:0009535	chloroplast thylakoid membrane	CC	60	374	2.09172e-26	AT1G03630, AT1G06680, AT1G08380, AT1G14150, AT1G14345, AT1G15820, AT1G18170, AT1G19150, AT1G20340, AT1G29395, AT1G29910, AT1G30380, AT1G31330, AT1G51400, AT1G52230, AT1G55670, AT1G61520, AT1G67740, AT1G75690, AT2G05070, AT2G05100, AT2G06520, AT2G10940, AT2G17972, AT2G20260, AT2G23670, AT2G34430, AT2G36145, AT2G45180, AT2G46820, AT3G01440, AT3G01500, AT3G08940, AT3G10060, AT3G16250, AT3G21055, AT3…
GO:0015979	photosynthesis	BP	38	142	6.32323e-24	AT1G03630, AT1G06680, AT1G08380, AT1G14150, AT1G15820, AT1G19150, AT1G29910, AT1G30380, AT1G31330, AT1G49975, AT1G52230, AT1G55670, AT1G61520, AT1G67740, AT2G05070, AT2G05100, AT2G06520, AT2G20260, AT2G34430, AT3G01440, AT3G01500, AT3G08940, AT3G21055, AT3G27690, AT3G54890, AT4G02770, AT4G05180, AT4G09650, AT4G10340, AT4G17600, AT4G28660, AT4G28750, AT5G38410, AT5G38420, AT5G38430, AT5G54190, AT5…
GO:0009579	thylakoid	CC	56	364	1.6581e-23	AT1G06680, AT1G08380, AT1G14150, AT1G15820, AT1G18170, AT1G19150, AT1G20340, AT1G29910, AT1G30380, AT1G31330, AT1G32220, AT1G52230, AT1G55670, AT1G61520, AT1G67740, AT1G74070, AT1G75690, AT2G05070, AT2G05100, AT2G20260, AT2G23670, AT2G34430, AT2G46820, AT3G01440, AT3G01500, AT3G08940, AT3G10060, AT3G16250, AT3G21055, AT3G26060, AT3G27690, AT3G27830, AT3G46780, AT3G47070, AT3G54890, AT3G63140, AT3…
GO:0009534	chloroplast thylakoid	CC	42	211	3.05371e-22	AT1G03630, AT1G06680, AT1G14150, AT1G14345, AT1G15820, AT1G20340, AT1G29910, AT1G30380, AT1G31330, AT1G52230, AT1G55670, AT1G61520, AT1G74070, AT1G75690, AT2G05070, AT2G20260, AT2G23670, AT2G31040, AT2G34430, AT2G46820, AT3G01440, AT3G02730, AT3G08940, AT3G10060, AT3G26060, AT3G46780, AT3G47070, AT3G54890, AT3G59780, AT3G63140, AT4G02770, AT4G05180, AT4G09010, AT4G09650, AT4G10340, AT4G27700, AT4…
GO:0009522	photosystem I	CC	22	38	4.50612e-21	AT1G08380, AT1G15820, AT1G19150, AT1G29910, AT1G30380, AT1G31330, AT1G49975, AT1G52230, AT1G55670, AT1G61520, AT2G05070, AT2G05100, AT2G20260, AT2G34430, AT3G08940, AT3G27690, AT3G54890, AT4G02770, AT4G10340, AT4G28750, AT5G54270, AT5G64040
GO:0009507	chloroplast	CC	114	2214	2.18039e-18	AT1G03310, AT1G03630, AT1G06680, AT1G08380, AT1G11700, AT1G12900, AT1G13930, AT1G14150, AT1G14345, AT1G15820, AT1G17650, AT1G18060, AT1G18170, AT1G18870, AT1G19150, AT1G20340, AT1G22630, AT1G29395, AT1G29910, AT1G30380, AT1G31330, AT1G32080, AT1G32220, AT1G43560, AT1G51100, AT1G52230, AT1G53520, AT1G55670, AT1G60950, AT1G61520, AT1G67740, AT1G70890, AT1G74070, AT1G75350, AT1G75690, AT2G05070, AT2…
GO:0009536	plastid	CC	87	1475	1.38254e-16	AT1G03310, AT1G03630, AT1G06680, AT1G08380, AT1G12900, AT1G14150, AT1G15820, AT1G17650, AT1G18170, AT1G18870, AT1G19150, AT1G20340, AT1G29395, AT1G29910, AT1G30380, AT1G31330, AT1G32080, AT1G32220, AT1G43560, AT1G51080, AT1G52230, AT1G53520, AT1G55670, AT1G60950, AT1G61520, AT1G67740, AT1G74070, AT1G75350, AT1G75690, AT2G05070, AT2G05100, AT2G20260, AT2G21370, AT2G24090, AT2G28900, AT2G34430, AT2…
GO:0019904	protein domain specific binding	MF	24	75	1.38254e-16	AT1G06680, AT1G15820, AT1G20340, AT1G31330, AT1G51400, AT1G61520, AT2G05100, AT2G06520, AT2G20260, AT2G28900, AT2G34430, AT2G45180, AT2G46820, AT3G02730, AT3G54890, AT4G02770, AT4G10340, AT4G25100, AT4G28750, AT5G38410, AT5G38420, AT5G38430, AT5G54270, AT5G64040
GO:0009523	photosystem II	CC	21	58	9.24357e-15	AT1G06680, AT1G14150, AT1G15820, AT1G19150, AT1G29910, AT1G61520, AT1G67740, AT2G05070, AT2G05100, AT2G06520, AT2G34430, AT3G01440, AT3G08940, AT3G21055, AT3G27690, AT3G54890, AT4G05180, AT4G10340, AT4G17600, AT4G28660, AT5G54270
GO:0010287	plastoglobule	CC	22	82	9.56929e-15	AT1G15820, AT1G19150, AT1G29910, AT1G31330, AT1G32220, AT1G52230, AT1G61520, AT2G05070, AT2G05100, AT2G20260, AT2G34430, AT3G08940, AT3G26060, AT3G27690, AT3G54890, AT3G63140, AT4G02770, AT4G09650, AT4G10340, AT4G19170, AT4G28750, AT5G54270
GO:0009941	chloroplast envelope	CC	46	552	7.58346e-13	AT1G03630, AT1G06680, AT1G12900, AT1G13930, AT1G15820, AT1G19150, AT1G29395, AT1G29910, AT1G31330, AT1G32080, AT1G55670, AT1G61520, AT1G75350, AT2G05070, AT2G05100, AT2G20260, AT2G28900, AT2G34430, AT2G42530, AT2G42540, AT2G46820, AT3G01500, AT3G08940, AT3G14210, AT3G26060, AT3G27690, AT3G27830, AT3G46780, AT3G47070, AT3G48420, AT3G54890, AT3G63140, AT3G63160, AT4G02770, AT4G09650, AT4G10340, AT4…
GO:0009768	photosynthesis, light harvesting in photosystem I	BP	13	22	2.06296e-12	AT1G08380, AT1G15820, AT1G19150, AT1G29910, AT1G61520, AT2G05070, AT2G05100, AT2G34430, AT3G08940, AT3G27690, AT3G54890, AT4G10340, AT5G54270
GO:0016168	chlorophyll binding	MF	15	35	5.91894e-12	AT1G15820, AT1G19150, AT1G29910, AT1G30380, AT1G55670, AT1G61520, AT2G05070, AT2G05100, AT2G34430, AT3G08940, AT3G27690, AT3G54890, AT4G10340, AT4G17600, AT5G54270
GO:0031409	pigment binding	MF	12	21	3.13193e-11	AT1G15820, AT1G19150, AT1G29910, AT1G61520, AT2G05070, AT2G05100, AT2G34430, AT3G08940, AT3G27690, AT3G54890, AT4G10340, AT5G54270
GO:0009765	photosynthesis, light harvesting	BP	12	22	7.10299e-11	AT1G15820, AT1G19150, AT1G29910, AT1G61520, AT2G05070, AT2G05100, AT2G34430, AT3G08940, AT3G27690, AT3G54890, AT4G10340, AT5G54270
GO:0018298	protein-chromophore linkage	BP	13	46	3.05217e-09	AT1G15820, AT1G19150, AT1G29910, AT1G61520, AT2G05070, AT2G05100, AT2G34430, AT3G08940, AT3G27690, AT3G54890, AT4G10340, AT4G17600, AT5G54270
GO:0010114	response to red light	BP	13	52	1.73776e-08	AT1G19150, AT1G29910, AT1G69530, AT2G05070, AT2G05100, AT3G08940, AT3G27690, AT3G54890, AT4G10340, AT4G32280, AT5G38410, AT5G38420, AT5G38430
GO:0010218	response to far red light	BP	12	46	4.26593e-08	AT1G19150, AT1G29910, AT2G05070, AT2G05100, AT3G08940, AT3G27690, AT3G54890, AT4G10340, AT4G32280, AT5G38410, AT5G38420, AT5G38430
GO:0009637	response to blue light	BP	10	49	6.29764e-06	AT1G19150, AT1G29910, AT2G05100, AT3G08940, AT3G27690, AT3G54890, AT4G10340, AT5G38410, AT5G38420, AT5G38430
GO:0009769	photosynthesis, light harvesting in photosystem II	BP	4	4	0.000233306	AT2G05070, AT2G05100, AT3G27690, AT5G54270
GO:0007623	circadian rhythm	BP	10	84	0.000747627	AT1G18330, AT2G42540, AT3G46780, AT3G63140, AT4G02630, AT4G15248, AT4G25100, AT4G32890, AT4G36240, AT5G56860
GO:0009538	photosystem I reaction center	CC	5	8	0.00075079	AT1G31330, AT1G52230, AT2G20260, AT4G02770, AT4G28750
GO:0009517	PSII associated light-harvesting complex II	CC	4	5	0.000910981	AT2G05070, AT2G05100, AT3G27690, AT4G10340
GO:0005576	extracellular region	CC	31	577	0.00104008	AT1G14700, AT1G20190, AT1G48100, AT1G60590, AT1G64390, AT1G66100, AT1G69530, AT1G74670, AT2G01505, AT2G03090, AT2G20750, AT2G40610, AT3G02885, AT3G05180, AT3G14210, AT3G16370, AT3G23805, AT3G29030, AT3G44990, AT4G00165, AT4G12550, AT4G18970, AT4G26790, AT4G28250, AT4G37800, AT5G40150, AT5G41900, AT5G44530, AT5G45950, AT5G63140, AT5G64770
GO:0009645	response to low light intensity stimulus	BP	5	10	0.00114038	AT1G61520, AT2G05070, AT2G05100, AT3G27690, AT3G54890
GO:0006949	syncytium formation	BP	5	11	0.00114038	AT1G69530, AT2G03090, AT2G20750, AT2G40610, AT4G28250
GO:0030410	nicotianamine synthase activity	MF	3	3	0.00383362	AT1G09240, AT1G56430, AT5G04950
GO:0030418	nicotianamine biosynthetic process	BP	3	3	0.00383362	AT1G09240, AT1G56430, AT5G04950
GO:1903428	positive regulation of reactive oxygen species biosynthetic process	BP	3	3	0.00561197	AT2G05070, AT2G05100, AT3G27690
GO:0016020	membrane	CC	143	5586	0.00824839	AT1G03630, AT1G06080, AT1G08380, AT1G10657, AT1G12845, AT1G12900, AT1G13080, AT1G14150, AT1G14280, AT1G14345, AT1G14700, AT1G15820, AT1G18265, AT1G18360, AT1G19150, AT1G20190, AT1G20340, AT1G23080, AT1G29395, AT1G29450, AT1G29910, AT1G30380, AT1G31330, AT1G32080, AT1G38131, AT1G45010, AT1G52230, AT1G53035, AT1G54820, AT1G55330, AT1G55670, AT1G61520, AT1G67740, AT1G68238, AT1G69530, AT1G72130, AT1…
GO:0009416	response to light stimulus	BP	11	123	0.00964021	AT1G26945, AT1G29910, AT1G43560, AT2G05070, AT2G05100, AT2G34430, AT2G42540, AT3G27690, AT4G32890, AT4G36240, AT5G56860
GO:0009570	chloroplast stroma	CC	29	631	0.0147177	AT1G06680, AT1G12900, AT1G13930, AT1G17650, AT1G20340, AT1G43560, AT1G51100, AT1G53520, AT1G75350, AT1G75690, AT2G36145, AT2G41950, AT2G42530, AT2G42540, AT3G01500, AT3G02730, AT3G27830, AT3G48420, AT3G52720, AT3G63140, AT4G05180, AT4G25100, AT4G25910, AT4G28660, AT5G16140, AT5G38410, AT5G38420, AT5G38430, AT5G51720
GO:0009733	response to auxin	BP	15	210	0.0214552	AT1G04250, AT1G29450, AT1G75580, AT2G21210, AT3G53250, AT4G12550, AT4G32280, AT4G34760, AT4G38840, AT4G38850, AT4G38860, AT5G18020, AT5G18030, AT5G18050, AT5G18080
GO:0071555	cell wall organization	BP	13	278	0.0446122	AT1G20190, AT1G48100, AT1G60590, AT1G64390, AT1G69530, AT2G03090, AT2G20750, AT2G40610, AT3G29030, AT3G44990, AT4G28250, AT4G37800, AT5G41900
GO:0009644	response to high light intensity	BP	7	55	0.0487507	AT1G61520, AT2G05070, AT2G05100, AT2G42540, AT3G27690, AT3G54890, AT5G54270
GO:0040008	regulation of growth	BP	9	100	0.0487507	AT1G26945, AT1G29450, AT4G34760, AT4G38850, AT5G18020, AT5G18030, AT5G18050, AT5G18080, AT5G39860
SF+PQ_vs_H2O+PQ H2O+PQ up
category	term	ontology	numDEInCat	numInCat	FDR	gene_ids
GO:0010200	response to chitin	BP	61	116	3.38947e-34	AT1G08930, AT1G27730, AT1G34180, AT1G42990, AT1G51800, AT1G62300, AT1G71520, AT1G75490, AT1G80840, AT2G13790, AT2G23320, AT2G26150, AT2G33710, AT2G35000, AT2G35930, AT2G37430, AT2G38470, AT2G40140, AT2G46400, AT3G05200, AT3G16530, AT3G19580, AT3G23230, AT3G23250, AT3G28210, AT3G46080, AT3G46090, AT3G46600, AT3G46620, AT3G50060, AT3G50260, AT3G53600, AT4G01250, AT4G17490, AT4G17500, AT4G18880, AT4…
GO:0006952	defense response	BP	119	581	1.25877e-24	AT1G02930, AT1G05010, AT1G10170, AT1G12210, AT1G14370, AT1G14780, AT1G15520, AT1G19250, AT1G29690, AT1G30135, AT1G31280, AT1G32960, AT1G43160, AT1G52030, AT1G61560, AT1G69790, AT1G70700, AT1G72260, AT1G73260, AT1G73805, AT1G75040, AT1G75830, AT1G79680, AT1G80820, AT2G01180, AT2G03760, AT2G13810, AT2G14610, AT2G15480, AT2G19190, AT2G26010, AT2G26020, AT2G26560, AT2G27500, AT2G30770, AT2G31880, AT2…
GO:0009611	response to wounding	BP	52	169	3.10999e-17	AT1G01720, AT1G16090, AT1G27730, AT1G30135, AT1G32920, AT1G43160, AT1G51760, AT1G52030, AT1G61120, AT1G66760, AT1G70700, AT1G73260, AT1G73500, AT1G74020, AT1G76650, AT1G76680, AT1G76690, AT1G80840, AT2G02990, AT2G24850, AT2G32800, AT2G34810, AT2G47800, AT3G11480, AT3G13790, AT3G14050, AT3G15356, AT3G25250, AT3G29035, AT3G44860, AT3G48360, AT3G51440, AT3G54420, AT3G61190, AT4G02380, AT4G11280, AT4…
GO:0006979	response to oxidative stress	BP	61	225	1.91817e-16	AT1G02930, AT1G07400, AT1G09940, AT1G09970, AT1G13340, AT1G14540, AT1G14870, AT1G16420, AT1G19020, AT1G27730, AT1G45145, AT1G52200, AT1G72060, AT1G78380, AT1G78410, AT2G16500, AT2G21640, AT2G29500, AT2G37040, AT2G40000, AT3G01420, AT3G10020, AT3G20340, AT3G25250, AT3G28340, AT3G30775, AT3G46090, AT3G49110, AT3G49120, AT3G57520, AT4G02380, AT4G08770, AT4G08780, AT4G11280, AT4G11850, AT4G12720, AT4…
GO:0050832	defense response to fungus	BP	52	187	4.34958e-15	AT1G03850, AT1G12200, AT1G19250, AT1G45145, AT1G51800, AT1G52400, AT1G75830, AT1G80840, AT2G02930, AT2G26010, AT2G26020, AT2G31865, AT2G33380, AT2G35000, AT2G38470, AT2G39210, AT2G39660, AT2G40140, AT2G43510, AT3G01290, AT3G01420, AT3G04720, AT3G05360, AT3G11340, AT3G11820, AT3G12500, AT3G16530, AT3G26830, AT3G48990, AT3G49110, AT3G49120, AT3G52400, AT4G01700, AT4G02520, AT4G11890, AT4G19700, AT4…
GO:0071456	cellular response to hypoxia	BP	17	21	1.9272e-13	AT1G05880, AT1G14540, AT1G19250, AT1G26380, AT1G26410, AT1G57630, AT2G23270, AT2G26150, AT2G26560, AT4G31970, AT4G37710, AT5G13320, AT5G25250, AT5G26920, AT5G57220, AT5G57510, AT5G64905
GO:0009636	response to toxic substance	BP	27	59	2.53653e-12	AT1G02920, AT1G02930, AT1G17170, AT1G17180, AT1G69920, AT1G69930, AT1G74590, AT1G75270, AT1G78340, AT1G78380, AT2G02390, AT2G02930, AT2G15490, AT2G29420, AT2G29460, AT2G29470, AT2G29480, AT2G29490, AT2G36750, AT2G37760, AT2G37770, AT2G47730, AT3G09270, AT4G02520, AT5G02780, AT5G39050, AT5G62480
GO:0009617	response to bacterium	BP	30	83	1.1447e-11	AT1G07000, AT1G12210, AT1G18570, AT1G33960, AT1G61120, AT1G66700, AT1G73805, AT1G79680, AT2G23150, AT2G32800, AT2G45220, AT3G12580, AT3G15352, AT3G26830, AT3G28930, AT3G50260, AT3G50480, AT3G50930, AT3G53180, AT3G54420, AT3G57240, AT4G15760, AT4G37990, AT4G39950, AT5G02490, AT5G06320, AT5G26920, AT5G49450, AT5G49520, AT5G57220
GO:0004364	glutathione transferase activity	MF	25	54	2.29115e-11	AT1G02920, AT1G02930, AT1G17170, AT1G17180, AT1G65820, AT1G69920, AT1G69930, AT1G74590, AT1G75270, AT1G78340, AT1G78380, AT2G02390, AT2G02930, AT2G29420, AT2G29460, AT2G29470, AT2G29480, AT2G29490, AT2G47730, AT3G09270, AT4G02520, AT4G19880, AT5G02780, AT5G44990, AT5G62480
GO:0009407	toxin catabolic process	BP	20	38	3.69199e-10	AT1G02920, AT1G02930, AT1G17170, AT1G17180, AT1G69920, AT1G69930, AT1G74590, AT1G78340, AT1G78380, AT2G02390, AT2G02930, AT2G29420, AT2G29460, AT2G29470, AT2G29480, AT2G29490, AT2G47730, AT3G09270, AT4G02520, AT5G62480
GO:0016491	oxidoreductase activity	MF	133	991	1.01576e-09	AT1G02400, AT1G05010, AT1G06570, AT1G06620, AT1G09940, AT1G12200, AT1G14540, AT1G17020, AT1G17745, AT1G17990, AT1G18020, AT1G19250, AT1G21400, AT1G26380, AT1G26390, AT1G26410, AT1G26420, AT1G30700, AT1G30720, AT1G30730, AT1G32350, AT1G37130, AT1G54100, AT1G59950, AT1G60730, AT1G60740, AT1G64710, AT1G64940, AT1G65970, AT1G72280, AT1G72680, AT1G76680, AT1G76690, AT1G78380, AT1G80820, AT2G02390, AT2…
GO:0009751	response to salicylic acid	BP	36	136	2.74302e-09	AT1G05560, AT1G15520, AT1G18570, AT1G28480, AT1G43160, AT1G48000, AT1G66700, AT1G73260, AT1G76680, AT1G79680, AT1G80840, AT2G03760, AT2G29420, AT2G33380, AT2G40000, AT2G47190, AT3G01420, AT3G44860, AT3G48360, AT3G50060, AT3G50480, AT3G51440, AT3G61190, AT4G23810, AT4G31800, AT4G37260, AT4G37610, AT4G39030, AT5G06320, AT5G08790, AT5G13330, AT5G24110, AT5G40990, AT5G46050, AT5G63160, AT5G67480
GO:0006749	glutathione metabolic process	BP	22	52	4.15836e-09	AT1G02920, AT1G02930, AT1G17170, AT1G17180, AT1G69920, AT1G69930, AT1G74590, AT1G75270, AT1G78340, AT1G78380, AT2G02930, AT2G29420, AT2G29460, AT2G29470, AT2G29480, AT2G29490, AT2G47730, AT3G09270, AT3G24170, AT4G02520, AT5G02780, AT5G62480
GO:0005576	extracellular region	CC	89	577	5.35521e-09	AT1G09560, AT1G14540, AT1G21310, AT1G22900, AT1G26380, AT1G26390, AT1G26410, AT1G26420, AT1G29290, AT1G30700, AT1G30720, AT1G30730, AT1G32170, AT1G32940, AT1G32950, AT1G32960, AT1G54000, AT1G62760, AT1G68765, AT1G72260, AT1G75040, AT1G75830, AT1G78830, AT1G78850, AT2G02990, AT2G04160, AT2G05380, AT2G14610, AT2G14620, AT2G15880, AT2G18660, AT2G22860, AT2G26010, AT2G26020, AT2G27500, AT2G34810, AT2…
GO:0042742	defense response to bacterium	BP	50	257	9.6521e-09	AT1G02920, AT1G02930, AT1G10170, AT1G18570, AT1G19250, AT1G31280, AT1G51890, AT1G66700, AT1G73260, AT1G73805, AT1G80840, AT2G13810, AT2G19190, AT2G23150, AT2G38470, AT2G43120, AT2G47130, AT2G47730, AT3G01420, AT3G04720, AT3G30775, AT3G49110, AT3G49120, AT3G50260, AT3G53810, AT3G54640, AT4G02520, AT4G12720, AT4G18360, AT4G19700, AT4G23140, AT4G23150, AT4G23210, AT4G23220, AT4G31800, AT4G39030, AT4…
GO:0009620	response to fungus	BP	23	68	1.77721e-08	AT1G05010, AT1G07000, AT1G51800, AT1G73500, AT1G79680, AT2G33380, AT2G39660, AT2G43580, AT2G45220, AT3G05360, AT3G06490, AT3G10985, AT3G11820, AT3G25780, AT3G50470, AT3G50480, AT3G51440, AT4G02380, AT4G16760, AT5G05190, AT5G08790, AT5G26920, AT5G40990
GO:0055114	oxidation-reduction process	BP	148	1190	2.06635e-08	AT1G02400, AT1G03850, AT1G05010, AT1G06570, AT1G06620, AT1G09480, AT1G09500, AT1G09940, AT1G12200, AT1G14540, AT1G17020, AT1G17745, AT1G17990, AT1G18020, AT1G19250, AT1G21400, AT1G26380, AT1G26390, AT1G26410, AT1G26420, AT1G28480, AT1G30700, AT1G30720, AT1G30730, AT1G32350, AT1G37130, AT1G45145, AT1G54100, AT1G59950, AT1G60730, AT1G60740, AT1G64710, AT1G64940, AT1G65970, AT1G69880, AT1G72280, AT1…
GO:0009651	response to salt stress	BP	68	415	3.2582e-08	AT1G02920, AT1G02930, AT1G03220, AT1G08930, AT1G10170, AT1G18570, AT1G25220, AT1G27730, AT1G43160, AT1G47510, AT1G48000, AT1G52400, AT1G54100, AT1G59860, AT1G69270, AT1G73260, AT1G73500, AT1G77510, AT2G03760, AT2G15390, AT2G16500, AT2G18190, AT2G20880, AT2G26650, AT2G30250, AT2G33380, AT2G37760, AT2G37770, AT2G38340, AT2G38470, AT2G46500, AT2G47190, AT2G47730, AT3G02140, AT3G04720, AT3G06490, AT3…
GO:0009737	response to abscisic acid	BP	60	351	3.2582e-08	AT1G01560, AT1G05100, AT1G08930, AT1G12420, AT1G18570, AT1G27730, AT1G43160, AT1G43910, AT1G47510, AT1G48000, AT1G52400, AT1G54100, AT1G58340, AT1G63840, AT1G65690, AT1G69270, AT2G32020, AT2G32240, AT2G33380, AT2G33590, AT2G40340, AT2G47190, AT3G01420, AT3G02140, AT3G06490, AT3G11820, AT3G14050, AT3G19580, AT3G21780, AT3G22060, AT3G24500, AT3G26830, AT3G28210, AT3G28580, AT3G46620, AT3G48360, AT3…
GO:0006855	drug transmembrane transport	BP	20	62	7.24106e-08	AT1G15520, AT1G30420, AT1G33110, AT1G58340, AT1G66760, AT1G71140, AT2G04040, AT2G04050, AT2G04070, AT2G04100, AT2G34660, AT2G47000, AT2G47800, AT3G13080, AT3G13100, AT3G23550, AT3G59140, AT4G39030, AT5G52450, AT5G65380
GO:0080043	quercetin 3-O-glucosyltransferase activity	MF	24	77	2.24703e-07	AT1G05560, AT1G05675, AT1G05680, AT1G07260, AT1G22400, AT2G15480, AT2G15490, AT2G30140, AT2G36750, AT2G36770, AT2G36780, AT2G36790, AT2G36800, AT2G43820, AT3G11340, AT3G21780, AT3G46660, AT3G46690, AT3G53160, AT4G15280, AT4G34131, AT4G34135, AT4G34138, AT5G03490
GO:0080044	quercetin 7-O-glucosyltransferase activity	MF	24	77	2.24703e-07	AT1G05560, AT1G05675, AT1G05680, AT1G07260, AT1G22400, AT2G15480, AT2G15490, AT2G30140, AT2G36750, AT2G36770, AT2G36780, AT2G36790, AT2G36800, AT2G43820, AT3G11340, AT3G21780, AT3G46660, AT3G46690, AT3G53160, AT4G15280, AT4G34131, AT4G34135, AT4G34138, AT5G03490
GO:0009873	ethylene-activated signaling pathway	BP	33	139	3.38293e-07	AT1G06160, AT1G13260, AT1G22190, AT1G25560, AT1G43160, AT1G62300, AT1G68840, AT1G71520, AT1G73500, AT2G20880, AT2G33710, AT2G47520, AT3G15356, AT3G23230, AT3G23240, AT3G24500, AT3G25730, AT3G50260, AT3G61630, AT4G06746, AT4G17490, AT4G17500, AT4G28140, AT5G07310, AT5G13330, AT5G21960, AT5G40990, AT5G47220, AT5G47230, AT5G51190, AT5G61590, AT5G61600, AT5G64750
GO:0042542	response to hydrogen peroxide	BP	19	54	7.94642e-07	AT1G16420, AT1G52560, AT1G73260, AT1G74310, AT2G26150, AT2G29500, AT3G12580, AT3G29035, AT3G48360, AT4G02380, AT4G12400, AT4G23810, AT4G37610, AT5G05410, AT5G12030, AT5G24110, AT5G39610, AT5G63160, AT5G67480
GO:0009753	response to jasmonic acid	BP	33	146	1.04091e-06	AT1G06160, AT1G15520, AT1G18570, AT1G43160, AT1G44350, AT1G47510, AT1G61120, AT1G70700, AT1G74020, AT2G24850, AT2G34810, AT2G39030, AT3G06490, AT3G09940, AT3G23250, AT3G44860, AT3G48360, AT3G50480, AT3G51440, AT4G05100, AT4G11280, AT4G19810, AT4G20860, AT4G34710, AT4G35770, AT4G37260, AT5G07010, AT5G08790, AT5G13220, AT5G13330, AT5G44420, AT5G46050, AT5G67480
GO:0016740	transferase activity	MF	235	2438	1.53759e-06	AT1G01560, AT1G01680, AT1G02920, AT1G02930, AT1G05100, AT1G05560, AT1G05675, AT1G05680, AT1G05880, AT1G07260, AT1G10070, AT1G11050, AT1G14370, AT1G15125, AT1G17170, AT1G17180, AT1G19020, AT1G21100, AT1G21110, AT1G21120, AT1G21240, AT1G22400, AT1G23870, AT1G30640, AT1G32170, AT1G33030, AT1G35710, AT1G36370, AT1G51860, AT1G51890, AT1G55850, AT1G55920, AT1G56140, AT1G61360, AT1G61370, AT1G61420, AT1…
GO:0051707	response to other organism	BP	11	19	2.00613e-06	AT1G19250, AT2G04450, AT2G15480, AT2G15490, AT2G35980, AT3G11480, AT3G13100, AT3G53160, AT3G54950, AT4G34131, AT4G34135
GO:0005618	cell wall	CC	66	447	2.72784e-06	AT1G02930, AT1G03220, AT1G09560, AT1G16030, AT1G17860, AT1G21310, AT1G26380, AT1G26390, AT1G26410, AT1G26420, AT1G30700, AT1G30720, AT1G30730, AT1G32170, AT1G32940, AT1G75040, AT1G78830, AT1G78850, AT2G02990, AT2G04160, AT2G14610, AT2G14620, AT2G15880, AT2G16060, AT2G18660, AT2G27500, AT2G34810, AT2G45220, AT2G47550, AT3G07970, AT3G09405, AT3G09440, AT3G12580, AT3G13790, AT3G15356, AT3G16530, AT3…
GO:0016758	transferase activity, transferring hexosyl groups	MF	25	94	2.72784e-06	AT1G05560, AT1G05675, AT1G05680, AT1G07260, AT1G22400, AT2G15480, AT2G15490, AT2G30140, AT2G36750, AT2G36770, AT2G36780, AT2G36790, AT2G36800, AT2G43820, AT3G11340, AT3G21780, AT3G46660, AT3G46690, AT3G53160, AT4G15270, AT4G15280, AT4G34131, AT4G34135, AT4G34138, AT5G03490
GO:0098869	cellular oxidant detoxification	BP	30	127	5.27767e-06	AT1G14540, AT1G45145, AT1G60740, AT1G65820, AT1G65970, AT1G69880, AT1G75270, AT1G78380, AT2G02390, AT2G27660, AT2G44370, AT2G47730, AT3G01420, AT3G24170, AT3G49110, AT3G49120, AT4G02520, AT4G08770, AT4G08780, AT4G31240, AT4G33420, AT4G37520, AT4G37530, AT5G05340, AT5G39580, AT5G47910, AT5G51060, AT5G58390, AT5G64110, AT5G64120
GO:0043565	sequence-specific DNA binding	MF	65	442	6.22349e-06	AT1G18570, AT1G22190, AT1G27730, AT1G48000, AT1G62300, AT1G66600, AT1G68840, AT1G69810, AT1G73805, AT1G74080, AT1G75490, AT1G80840, AT2G20880, AT2G23320, AT2G26150, AT2G30250, AT2G38250, AT2G38340, AT2G38470, AT2G40340, AT2G46400, AT2G47190, AT3G01970, AT3G04070, AT3G04670, AT3G06490, AT3G10500, AT3G19580, AT3G23250, AT3G24500, AT3G25730, AT3G29035, AT3G46600, AT3G50060, AT3G61630, AT4G01250, AT4…
GO:0008152	metabolic process	BP	93	752	6.82527e-06	AT1G02850, AT1G05560, AT1G05675, AT1G05680, AT1G07260, AT1G08940, AT1G10070, AT1G17745, AT1G21400, AT1G22400, AT1G25220, AT1G32170, AT1G44350, AT1G51760, AT1G52400, AT1G54100, AT1G61120, AT1G61810, AT1G68620, AT1G75020, AT2G04400, AT2G14620, AT2G15480, AT2G15490, AT2G26560, AT2G27500, AT2G30140, AT2G36750, AT2G36770, AT2G36780, AT2G36790, AT2G36800, AT2G41380, AT2G43570, AT2G43580, AT2G43590, AT2…
GO:0004601	peroxidase activity	MF	22	80	1.82268e-05	AT1G14540, AT1G60740, AT1G65970, AT1G78380, AT2G02390, AT2G47730, AT3G01420, AT3G49110, AT3G49120, AT4G02520, AT4G08770, AT4G08780, AT4G33420, AT4G37520, AT4G37530, AT5G05340, AT5G39580, AT5G47910, AT5G51060, AT5G58390, AT5G64110, AT5G64120
GO:0009408	response to heat	BP	28	130	2.15553e-05	AT1G07400, AT1G16030, AT1G52560, AT1G58340, AT1G59860, AT1G74310, AT2G26150, AT2G29500, AT2G33590, AT2G38470, AT3G08720, AT3G08970, AT3G09350, AT3G09440, AT3G12580, AT3G24500, AT3G46230, AT3G61190, AT4G12400, AT4G36990, AT5G02490, AT5G05410, AT5G12020, AT5G12030, AT5G22060, AT5G47910, AT5G57560, AT5G59820
GO:0009414	response to water deprivation	BP	42	249	2.74409e-05	AT1G02930, AT1G07000, AT1G08930, AT1G22190, AT1G27730, AT1G43160, AT1G52400, AT1G52690, AT1G52890, AT1G69270, AT2G14610, AT2G26650, AT2G33590, AT2G35930, AT2G37760, AT2G37770, AT2G38340, AT2G38470, AT2G47190, AT2G47800, AT3G09940, AT3G15500, AT3G19580, AT3G24500, AT3G26830, AT3G30775, AT3G46620, AT4G02280, AT4G02380, AT4G11890, AT4G27410, AT4G39950, AT5G05410, AT5G13330, AT5G13750, AT5G20830, AT5…
GO:0035251	UDP-glucosyltransferase activity	MF	10	19	4.25306e-05	AT1G05560, AT1G05680, AT2G15480, AT2G15490, AT2G36750, AT2G36790, AT2G43820, AT4G34131, AT4G34135, AT5G03490
GO:0008559	xenobiotic-transporting ATPase activity	MF	7	14	4.25306e-05	AT1G30420, AT2G34660, AT2G47000, AT2G47800, AT3G13080, AT3G13100, AT3G59140
GO:0042908	xenobiotic transport	BP	7	14	4.25306e-05	AT1G30420, AT2G34660, AT2G47000, AT2G47800, AT3G13080, AT3G13100, AT3G59140
GO:0010150	leaf senescence	BP	20	79	4.63008e-05	AT1G17020, AT1G69490, AT1G73500, AT2G13810, AT2G35980, AT2G43000, AT2G43570, AT3G10500, AT3G10985, AT3G11340, AT3G29035, AT4G01250, AT4G02380, AT4G16690, AT4G23810, AT5G08790, AT5G11520, AT5G39610, AT5G45890, AT5G59220
GO:0080167	response to karrikin	BP	26	118	6.33138e-05	AT1G05680, AT1G61800, AT1G71100, AT2G36080, AT2G37040, AT2G47730, AT3G09440, AT3G13790, AT3G44720, AT3G45060, AT3G57520, AT4G02940, AT4G13510, AT4G27280, AT4G33980, AT4G34710, AT4G35110, AT4G37290, AT4G37370, AT4G39070, AT5G05600, AT5G13750, AT5G18470, AT5G20250, AT5G40780, AT5G48540
GO:0002238	response to molecule of fungal origin	BP	8	13	0.00011538	AT1G07000, AT1G51800, AT1G66700, AT1G73260, AT3G05360, AT3G10985, AT3G19260, AT3G44860
GO:0006032	chitin catabolic process	BP	9	17	0.000223953	AT2G43570, AT2G43580, AT2G43590, AT2G43620, AT3G12500, AT3G47540, AT3G54420, AT4G01700, AT4G19810
GO:0009626	plant-type hypersensitive response	BP	17	68	0.000315905	AT1G14780, AT1G19250, AT1G29690, AT1G73805, AT2G01180, AT2G26560, AT2G47130, AT3G01420, AT3G12500, AT3G50470, AT3G50480, AT3G50930, AT4G12720, AT4G23210, AT5G13320, AT5G26920, AT5G45890
GO:0055085	transmembrane transport	BP	60	478	0.00033153	AT1G01340, AT1G02520, AT1G08930, AT1G11260, AT1G23090, AT1G30420, AT1G33110, AT1G48370, AT1G49960, AT1G53470, AT1G58340, AT1G66570, AT1G66760, AT1G69870, AT1G71140, AT1G76520, AT1G79410, AT2G02810, AT2G04040, AT2G04050, AT2G04070, AT2G04100, AT2G17500, AT2G26650, AT2G34355, AT2G34660, AT2G36380, AT2G39210, AT2G47000, AT2G47800, AT3G13080, AT3G13100, AT3G18830, AT3G20660, AT3G23550, AT3G45060, AT3…
GO:0020037	heme binding	MF	37	222	0.00033153	AT1G14540, AT1G37130, AT1G64940, AT2G16060, AT2G24180, AT2G30750, AT2G30770, AT2G34500, AT2G37970, AT2G45570, AT3G01420, AT3G14620, AT3G14680, AT3G25180, AT3G26200, AT3G26210, AT3G26220, AT3G26830, AT3G28740, AT3G49110, AT3G49120, AT4G08770, AT4G08780, AT4G22710, AT4G31970, AT4G33420, AT4G37370, AT4G37520, AT4G37530, AT4G39950, AT5G05340, AT5G39580, AT5G57220, AT5G58390, AT5G64110, AT5G64120, AT5…
GO:0003700	transcription factor activity, sequence-specific DNA binding	MF	119	1074	0.00034169	AT1G01720, AT1G02220, AT1G02230, AT1G06160, AT1G10170, AT1G10585, AT1G10586, AT1G13260, AT1G18570, AT1G22190, AT1G25560, AT1G27730, AT1G32870, AT1G34180, AT1G42990, AT1G43160, AT1G48000, AT1G49900, AT1G52890, AT1G62300, AT1G66600, AT1G68840, AT1G69490, AT1G69810, AT1G71520, AT1G73805, AT1G74080, AT1G75490, AT1G77450, AT1G80840, AT2G20880, AT2G22770, AT2G23320, AT2G25900, AT2G26150, AT2G30250, AT2…
GO:0016998	cell wall macromolecule catabolic process	BP	8	14	0.000392556	AT2G43570, AT2G43580, AT2G43590, AT2G43620, AT3G12500, AT3G47540, AT3G54420, AT4G01700
GO:0009816	defense response to bacterium, incompatible interaction	BP	12	38	0.000443237	AT2G40000, AT3G05200, AT3G56710, AT4G11650, AT4G23190, AT4G23810, AT5G06320, AT5G13320, AT5G26920, AT5G27420, AT5G45110, AT5G52640
GO:0005886	plasma membrane	CC	215	2376	0.000443237	AT1G01340, AT1G02520, AT1G03220, AT1G05340, AT1G07000, AT1G08050, AT1G09970, AT1G10140, AT1G11050, AT1G11260, AT1G12210, AT1G13210, AT1G14370, AT1G14870, AT1G15520, AT1G16030, AT1G22280, AT1G23730, AT1G24140, AT1G26380, AT1G30320, AT1G35230, AT1G37130, AT1G45145, AT1G47510, AT1G48370, AT1G51760, AT1G51800, AT1G51890, AT1G52200, AT1G53470, AT1G55850, AT1G56060, AT1G56140, AT1G56145, AT1G57990, AT1…
GO:1900057	positive regulation of leaf senescence	BP	7	11	0.000520541	AT1G05100, AT1G34180, AT1G77450, AT2G45210, AT3G04060, AT3G29035, AT5G39610
GO:0043295	glutathione binding	MF	7	11	0.000575723	AT1G02920, AT1G02930, AT1G17170, AT1G75270, AT1G78380, AT2G47730, AT4G02520
GO:0005516	calmodulin binding	MF	28	182	0.00081607	AT1G01340, AT1G61360, AT1G61370, AT1G61420, AT1G61560, AT1G73805, AT2G02010, AT2G23320, AT2G34660, AT2G47190, AT3G04670, AT3G20410, AT3G22910, AT3G48360, AT3G63380, AT4G01010, AT4G21390, AT4G29900, AT4G30490, AT4G33050, AT4G37610, AT4G37640, AT5G17330, AT5G26920, AT5G48570, AT5G63160, AT5G66210, AT5G67480
GO:0002237	response to molecule of bacterial origin	BP	9	22	0.000854136	AT1G07000, AT1G51800, AT1G73260, AT1G80840, AT3G05360, AT3G50930, AT4G23210, AT4G31800, AT5G26920
GO:0010224	response to UV-B	BP	15	57	0.00109084	AT1G05880, AT1G32870, AT1G35210, AT1G66580, AT1G73805, AT1G75040, AT2G01180, AT2G22880, AT2G36750, AT2G37040, AT5G05410, AT5G26920, AT5G45890, AT5G52250, AT5G59820
GO:0004568	chitinase activity	MF	8	16	0.00117094	AT2G43570, AT2G43580, AT2G43590, AT2G43620, AT3G12500, AT3G47540, AT3G54420, AT4G01700
GO:0015238	drug transmembrane transporter activity	MF	12	40	0.00170799	AT1G33110, AT1G58340, AT1G66760, AT1G71140, AT2G04040, AT2G04050, AT2G04070, AT2G04100, AT3G23550, AT4G39030, AT5G52450, AT5G65380
GO:0050660	flavin adenine dinucleotide binding	MF	20	102	0.00178348	AT1G12200, AT1G19250, AT1G26380, AT1G26390, AT1G26410, AT1G26420, AT1G30700, AT1G30720, AT1G30730, AT2G34810, AT3G09940, AT3G24170, AT4G16760, AT4G20830, AT4G20860, AT5G03630, AT5G20960, AT5G24160, AT5G44380, AT5G65110
GO:0046686	response to cadmium ion	BP	44	321	0.00240556	AT1G02920, AT1G02930, AT1G36370, AT1G45145, AT1G48000, AT1G75040, AT1G76680, AT1G77510, AT1G78380, AT2G26560, AT2G32240, AT2G33590, AT2G37760, AT2G41380, AT2G47190, AT3G09270, AT3G09440, AT3G12500, AT3G12580, AT3G14990, AT3G23250, AT3G44300, AT3G48990, AT3G53230, AT4G02520, AT4G16760, AT4G19880, AT4G21680, AT4G25200, AT4G37260, AT4G37910, AT4G39230, AT5G02490, AT5G03630, AT5G07440, AT5G11670, AT5…
GO:0008061	chitin binding	MF	8	18	0.00240556	AT2G43570, AT2G43580, AT2G43590, AT2G43620, AT3G04720, AT3G12500, AT3G54420, AT4G19810
GO:0004674	protein serine/threonine kinase activity	MF	70	659	0.00251952	AT1G01560, AT1G05100, AT1G07150, AT1G11050, AT1G14370, AT1G16090, AT1G21240, AT1G30640, AT1G35710, AT1G51860, AT1G51890, AT1G56140, AT1G61360, AT1G61370, AT1G61420, AT1G67000, AT1G67520, AT1G68690, AT1G69270, AT1G69790, AT1G70530, AT1G71530, AT1G73500, AT1G74360, AT1G79680, AT2G13790, AT2G19190, AT2G23450, AT2G30360, AT2G31880, AT2G32800, AT2G39660, AT2G46500, AT2G48010, AT3G08720, AT3G09010, AT3…
GO:0042626	ATPase activity, coupled to transmembrane movement of substances	MF	14	76	0.00273972	AT1G02520, AT1G15520, AT1G30420, AT2G34660, AT2G36380, AT2G47000, AT2G47800, AT3G13080, AT3G13100, AT3G47780, AT3G59140, AT3G62150, AT4G15233, AT4G18050
GO:0016614	oxidoreductase activity, acting on CH-OH group of donors	MF	12	46	0.00302696	AT1G26380, AT1G26390, AT1G26410, AT1G26420, AT1G30700, AT1G30720, AT1G30730, AT2G34810, AT4G20830, AT4G20860, AT5G20960, AT5G44380
GO:0005975	carbohydrate metabolic process	BP	47	363	0.00384542	AT1G02850, AT1G30620, AT1G32170, AT1G52400, AT1G61810, AT2G14620, AT2G27500, AT2G31865, AT2G43570, AT2G43580, AT2G43590, AT2G43620, AT2G43870, AT2G44480, AT3G04010, AT3G06500, AT3G07970, AT3G12500, AT3G13790, AT3G47540, AT3G48580, AT3G54420, AT3G55430, AT3G57240, AT3G57260, AT3G57520, AT3G60120, AT3G60140, AT4G01700, AT4G10960, AT4G16260, AT4G18990, AT4G19810, AT4G25810, AT4G25900, AT4G27830, AT4…
GO:0016798	hydrolase activity, acting on glycosyl bonds	MF	33	225	0.00384542	AT1G02850, AT1G32170, AT1G52400, AT1G61810, AT2G14620, AT2G27500, AT2G43570, AT2G43580, AT2G43590, AT2G43620, AT2G43870, AT2G44480, AT3G04010, AT3G06500, AT3G07970, AT3G12500, AT3G13790, AT3G48580, AT3G54420, AT3G57240, AT3G57260, AT3G60120, AT3G60140, AT4G16260, AT4G18990, AT4G25810, AT4G27830, AT4G30270, AT4G34860, AT5G49360, AT5G56870, AT5G57550, AT5G57560
GO:0042744	hydrogen peroxide catabolic process	BP	13	48	0.00513475	AT1G14540, AT3G49110, AT3G49120, AT4G08770, AT4G08780, AT4G33420, AT4G37520, AT4G37530, AT5G05340, AT5G39580, AT5G58390, AT5G64110, AT5G64120
GO:0016757	transferase activity, transferring glycosyl groups	MF	53	454	0.00672203	AT1G05560, AT1G05675, AT1G05680, AT1G07260, AT1G22400, AT1G23870, AT1G55850, AT1G62305, AT1G68390, AT1G70290, AT1G73810, AT2G03360, AT2G15390, AT2G15480, AT2G15490, AT2G18700, AT2G28110, AT2G30140, AT2G36750, AT2G36770, AT2G36780, AT2G36790, AT2G36800, AT2G37980, AT2G41640, AT2G43820, AT2G44500, AT3G10320, AT3G11340, AT3G21780, AT3G28340, AT3G46660, AT3G46690, AT3G53160, AT3G57380, AT3G57520, AT4…
GO:0009723	response to ethylene	BP	19	100	0.00700296	AT1G06160, AT1G15520, AT1G18570, AT1G25220, AT1G68765, AT2G47190, AT3G04720, AT3G06490, AT3G23250, AT3G50060, AT3G50480, AT3G51440, AT4G02380, AT4G05100, AT4G37260, AT5G05730, AT5G13330, AT5G39610, AT5G44420
GO:0042787	protein ubiquitination involved in ubiquitin-dependent protein catabolic process	BP	18	91	0.00729453	AT1G02980, AT1G05880, AT1G14200, AT1G14330, AT1G15670, AT1G26800, AT1G55530, AT1G80440, AT3G13430, AT3G46620, AT3G48360, AT4G37610, AT5G20910, AT5G45110, AT5G59550, AT5G60250, AT5G63160, AT5G67480
GO:0015297	antiporter activity	MF	19	103	0.00847752	AT1G33110, AT1G58340, AT1G66760, AT1G71140, AT2G02810, AT2G04040, AT2G04050, AT2G04070, AT2G04100, AT3G23550, AT3G51860, AT4G23700, AT4G39030, AT5G09470, AT5G17860, AT5G27520, AT5G41610, AT5G52450, AT5G65380
GO:0016887	ATPase activity	MF	26	206	0.00847752	AT1G02520, AT1G15520, AT1G30420, AT1G43910, AT1G67120, AT2G18190, AT2G18193, AT2G34660, AT2G36380, AT2G47000, AT2G47800, AT3G13080, AT3G13100, AT3G28510, AT3G28580, AT3G28600, AT3G47780, AT3G50930, AT3G59140, AT3G62150, AT4G15233, AT4G18050, AT5G40010, AT5G51070, AT5G57480, AT5G60730
GO:0034605	cellular response to heat	BP	8	22	0.00847752	AT1G43160, AT2G26150, AT2G30250, AT2G38340, AT2G38470, AT3G08970, AT4G25380, AT5G07100
GO:0004672	protein kinase activity	MF	80	824	0.00871189	AT1G01560, AT1G05100, AT1G07150, AT1G09970, AT1G11050, AT1G14370, AT1G21240, AT1G30640, AT1G34420, AT1G35710, AT1G51800, AT1G51860, AT1G51890, AT1G56140, AT1G56145, AT1G61360, AT1G61370, AT1G61420, AT1G66880, AT1G67000, AT1G67520, AT1G68690, AT1G69270, AT1G69790, AT1G70530, AT1G71530, AT1G73500, AT1G74330, AT1G74360, AT1G79680, AT2G13790, AT2G19190, AT2G23450, AT2G30360, AT2G31880, AT2G32800, AT2…
GO:0030162	regulation of proteolysis	BP	8	23	0.0115579	AT1G14330, AT1G15670, AT1G80440, AT3G48360, AT4G37610, AT5G45110, AT5G63160, AT5G67480
GO:0044212	transcription regulatory region DNA binding	MF	30	197	0.0142066	AT1G02220, AT1G18570, AT1G48000, AT1G62300, AT1G66600, AT1G74080, AT1G75490, AT1G80840, AT2G23320, AT2G26150, AT2G38340, AT2G38470, AT2G40340, AT2G46400, AT3G01970, AT3G06490, AT3G19580, AT3G23250, AT3G25730, AT3G50060, AT4G05100, AT4G37260, AT5G04340, AT5G05410, AT5G13080, AT5G24110, AT5G49450, AT5G61590, AT5G61600, AT5G63790
GO:0010112	regulation of systemic acquired resistance	BP	6	13	0.0144694	AT1G44350, AT1G73805, AT3G26830, AT5G13220, AT5G13320, AT5G26920
GO:0010193	response to ozone	BP	9	30	0.0150859	AT1G15520, AT3G02840, AT3G10985, AT4G11170, AT4G12720, AT4G23810, AT5G24110, AT5G27600, AT5G42380
GO:0031640	killing of cells of other organism	BP	8	22	0.0150859	AT1G75830, AT2G26010, AT2G26020, AT2G43510, AT3G04720, AT3G12500, AT5G44420, AT5G44430
GO:0003006	developmental process involved in reproduction	BP	6	13	0.0150859	AT1G05340, AT1G56060, AT2G32190, AT2G32200, AT2G32210, AT3G22240
GO:0006468	protein phosphorylation	BP	81	853	0.0156463	AT1G01560, AT1G05100, AT1G07150, AT1G09970, AT1G11050, AT1G14370, AT1G16090, AT1G21240, AT1G30640, AT1G34420, AT1G35710, AT1G51800, AT1G51860, AT1G51890, AT1G56140, AT1G56145, AT1G61360, AT1G61370, AT1G61420, AT1G66880, AT1G67000, AT1G67520, AT1G68690, AT1G69270, AT1G69790, AT1G70530, AT1G71530, AT1G73500, AT1G74330, AT1G74360, AT1G79680, AT2G13790, AT2G19190, AT2G23450, AT2G30360, AT2G31880, AT2…
GO:0071949	FAD binding	MF	7	19	0.0156463	AT2G29720, AT3G30775, AT4G15760, AT4G16760, AT4G38540, AT5G38710, AT5G65110
GO:0044550	secondary metabolite biosynthetic process	BP	16	81	0.0171882	AT1G64940, AT2G24180, AT2G29720, AT2G30750, AT2G45570, AT3G25180, AT3G26200, AT3G26210, AT3G26220, AT3G28740, AT4G15760, AT4G22710, AT4G31970, AT4G37370, AT4G38540, AT5G67310
GO:0004553	hydrolase activity, hydrolyzing O-glycosyl compounds	MF	26	177	0.0197091	AT1G02850, AT1G32170, AT1G52400, AT1G61810, AT2G03505, AT2G14620, AT2G27500, AT2G44480, AT3G04010, AT3G13790, AT3G48580, AT3G55430, AT3G57240, AT3G57260, AT3G60120, AT3G60140, AT4G16260, AT4G18990, AT4G25810, AT4G27830, AT4G30270, AT5G20940, AT5G49360, AT5G56870, AT5G57550, AT5G57560
GO:0070588	calcium ion transmembrane transport	BP	10	45	0.0197647	AT1G63440, AT2G29110, AT3G22910, AT3G51860, AT3G63380, AT4G29900, AT4G37640, AT5G11210, AT5G48400, AT5G48410
GO:0048046	apoplast	CC	46	372	0.0215221	AT1G09560, AT1G15415, AT1G17860, AT1G22900, AT1G29290, AT1G32170, AT1G45145, AT1G62760, AT1G68765, AT1G75040, AT1G78830, AT1G78850, AT2G14610, AT2G14620, AT2G18660, AT2G43570, AT2G43620, AT2G46140, AT3G09440, AT3G12580, AT3G13080, AT3G13790, AT3G15356, AT3G16530, AT3G48580, AT3G48990, AT3G49120, AT3G57240, AT3G57260, AT4G02520, AT4G08950, AT4G18990, AT4G20830, AT4G25810, AT4G28460, AT4G30270, AT4…
GO:0043161	proteasome-mediated ubiquitin-dependent protein catabolic process	BP	29	194	0.0226942	AT1G14200, AT1G14330, AT1G15670, AT1G26800, AT1G55530, AT1G63840, AT1G80440, AT2G35000, AT2G42350, AT3G05200, AT3G13430, AT3G18773, AT3G46620, AT3G48360, AT3G60966, AT4G11370, AT4G17245, AT4G19700, AT4G37610, AT5G20910, AT5G27420, AT5G43420, AT5G45110, AT5G53110, AT5G55970, AT5G59550, AT5G63160, AT5G66070, AT5G67480
GO:0016301	kinase activity	MF	99	1083	0.0230927	AT1G01560, AT1G04280, AT1G05100, AT1G07150, AT1G09970, AT1G11050, AT1G14370, AT1G16090, AT1G21240, AT1G29195, AT1G30640, AT1G34420, AT1G35710, AT1G51800, AT1G51860, AT1G51890, AT1G56140, AT1G56145, AT1G61360, AT1G61370, AT1G61420, AT1G61640, AT1G66880, AT1G67000, AT1G67520, AT1G68690, AT1G69270, AT1G69790, AT1G70530, AT1G71530, AT1G73500, AT1G74330, AT1G74360, AT1G79680, AT2G13790, AT2G19190, AT2…
GO:0009627	systemic acquired resistance	BP	10	39	0.0232727	AT1G19250, AT1G75040, AT2G14610, AT2G18660, AT2G43570, AT3G01420, AT3G04720, AT3G57260, AT5G40990, AT5G45110
GO:0006073	cellular glucan metabolic process	BP	8	24	0.0263977	AT1G32170, AT2G14620, AT3G48580, AT4G18990, AT4G25810, AT4G30270, AT5G57550, AT5G57560
GO:0016762	xyloglucan:xyloglucosyl transferase activity	MF	8	24	0.0263977	AT1G32170, AT2G14620, AT3G48580, AT4G18990, AT4G25810, AT4G30270, AT5G57550, AT5G57560
GO:0004497	monooxygenase activity	MF	26	175	0.0275485	AT1G12200, AT1G19250, AT1G64940, AT2G24180, AT2G29720, AT2G30750, AT2G34500, AT2G45570, AT3G14620, AT3G14680, AT3G25180, AT3G26200, AT3G26210, AT3G26220, AT3G26830, AT3G28740, AT4G15760, AT4G22710, AT4G31970, AT4G37370, AT4G38540, AT4G39950, AT5G24160, AT5G35320, AT5G57220, AT5G67310
GO:0050403	trans-zeatin O-beta-D-glucosyltransferase activity	MF	3	3	0.0278378	AT1G22400, AT2G36750, AT2G36800
GO:0050502	cis-zeatin O-beta-D-glucosyltransferase activity	MF	3	3	0.0278378	AT1G22400, AT2G36750, AT2G36800
GO:0016709	oxidoreductase activity, acting on paired donors, with incorporation or reduction of molecular oxygen, NAD(P)H as one donor, and incorporation of one atom of oxygen	MF	16	86	0.0278378	AT1G64940, AT2G24180, AT2G30750, AT2G30770, AT2G45570, AT3G26200, AT3G26210, AT3G26220, AT3G26830, AT3G28740, AT4G22710, AT4G31970, AT4G37370, AT4G39950, AT5G57220, AT5G67310
GO:0005388	calcium-transporting ATPase activity	MF	5	14	0.0278378	AT1G63440, AT3G22910, AT3G63380, AT4G29900, AT4G37640
GO:0010120	camalexin biosynthetic process	BP	5	10	0.0278378	AT1G73500, AT2G38470, AT2G43000, AT3G26830, AT4G39950
GO:0047893	flavonol 3-O-glucosyltransferase activity	MF	5	10	0.0278439	AT2G15480, AT2G15490, AT3G46660, AT4G34131, AT4G34135
GO:0000162	tryptophan biosynthetic process	BP	7	20	0.0305157	AT1G25220, AT2G04400, AT3G54640, AT4G27070, AT5G05730, AT5G17990, AT5G54810
GO:0009625	response to insect	BP	8	27	0.0305157	AT1G18570, AT1G52400, AT1G73260, AT1G74080, AT3G26830, AT4G02380, AT4G39950, AT5G44420
GO:0019438	aromatic compound biosynthetic process	BP	4	6	0.0338405	AT1G21100, AT1G21110, AT1G21120, AT1G33030
GO:0009817	defense response to fungus, incompatible interaction	BP	10	43	0.0357971	AT1G02920, AT1G61560, AT3G04720, AT3G15356, AT4G11650, AT4G16260, AT5G38900, AT5G40990, AT5G45110, AT5G45890
GO:0006816	calcium ion transport	BP	9	41	0.0365452	AT2G29110, AT3G22910, AT3G51860, AT3G63380, AT4G29900, AT4G37640, AT5G11210, AT5G48400, AT5G48410
GO:2000762	regulation of phenylpropanoid metabolic process	BP	4	7	0.0415361	AT1G15670, AT1G80440, AT2G44130, AT3G59940
GO:0016310	phosphorylation	BP	98	1093	0.0421602	AT1G01560, AT1G04280, AT1G05100, AT1G07150, AT1G09970, AT1G11050, AT1G14370, AT1G16090, AT1G21240, AT1G29195, AT1G30640, AT1G34420, AT1G35710, AT1G51800, AT1G51860, AT1G51890, AT1G56140, AT1G56145, AT1G61360, AT1G61370, AT1G61420, AT1G61640, AT1G66880, AT1G67000, AT1G67520, AT1G68690, AT1G69270, AT1G69790, AT1G70530, AT1G71530, AT1G73500, AT1G74330, AT1G74360, AT1G79680, AT2G13790, AT2G19190, AT2…
GO:0016021	integral component of membrane	CC	363	4444	0.0460075	AT1G01340, AT1G02520, AT1G02610, AT1G02660, AT1G05575, AT1G07150, AT1G08930, AT1G09970, AT1G10340, AT1G11050, AT1G11260, AT1G11925, AT1G12200, AT1G13210, AT1G14870, AT1G15520, AT1G16090, AT1G20350, AT1G21240, AT1G21400, AT1G22890, AT1G23090, AT1G23850, AT1G24145, AT1G24440, AT1G25400, AT1G27290, AT1G29290, AT1G29330, AT1G30420, AT1G30620, AT1G32127, AT1G32350, AT1G32870, AT1G33110, AT1G34180, AT1…
GO:0009835	fruit ripening	BP	4	7	0.0495806	AT1G01480, AT1G05010, AT1G69490, AT4G11280

## Sheet: H2O+PQ_vs_H2O+H2O.goseq
H2O+PQ_vs_H2O+H2O H2O+PQ up
category	term	ontology	numDEInCat	numInCat	FDR	gene_ids
GO:0006952	defense response	BP	110	581	3.20435e-22	AT1G02930, AT1G05010, AT1G10170, AT1G12210, AT1G14370, AT1G15520, AT1G19250, AT1G31280, AT1G32960, AT1G43160, AT1G51660, AT1G61560, AT1G69790, AT1G72930, AT1G73260, AT1G73805, AT1G74710, AT1G75040, AT1G75830, AT1G79680, AT2G01180, AT2G03760, AT2G13810, AT2G14610, AT2G15480, AT2G17120, AT2G17220, AT2G19190, AT2G26010, AT2G26020, AT2G26560, AT2G30770, AT2G31230, AT2G31880, AT2G35000, AT2G35980, AT2…
GO:0009636	response to toxic substance	BP	31	59	3.29867e-17	AT1G02920, AT1G02930, AT1G17170, AT1G17180, AT1G69920, AT1G69930, AT1G74590, AT1G75270, AT1G78340, AT1G78380, AT2G02390, AT2G02930, AT2G15490, AT2G29420, AT2G29460, AT2G29470, AT2G29480, AT2G29490, AT2G30870, AT2G36750, AT2G37760, AT2G37770, AT2G47730, AT3G09270, AT3G23560, AT4G01070, AT4G02520, AT4G15550, AT5G02780, AT5G39050, AT5G62480
GO:0050832	defense response to fungus	BP	53	187	3.29867e-17	AT1G02360, AT1G03850, AT1G12200, AT1G19250, AT1G21250, AT1G51800, AT1G74710, AT1G75830, AT1G80840, AT2G02930, AT2G14560, AT2G26010, AT2G26020, AT2G31865, AT2G35000, AT2G38470, AT2G39210, AT2G39660, AT2G40140, AT2G43510, AT3G01290, AT3G01420, AT3G04720, AT3G05360, AT3G11340, AT3G11820, AT3G12500, AT3G16530, AT3G26830, AT3G48990, AT3G49110, AT3G49120, AT3G52400, AT3G56400, AT4G01700, AT4G02520, AT4…
GO:0010200	response to chitin	BP	39	116	2.16429e-14	AT1G08930, AT1G27730, AT1G34180, AT1G42990, AT1G51800, AT1G62300, AT1G71520, AT1G80840, AT2G13790, AT2G23320, AT2G26150, AT2G31230, AT2G33710, AT2G35000, AT2G37430, AT2G38470, AT2G40140, AT2G46400, AT3G05200, AT3G16530, AT3G23230, AT3G28210, AT3G46080, AT3G46090, AT3G50260, AT3G56400, AT4G17500, AT4G18880, AT4G26120, AT4G33050, AT5G04340, AT5G25910, AT5G27420, AT5G37490, AT5G47220, AT5G56960, AT5…
GO:0009617	response to bacterium	BP	32	83	2.30616e-14	AT1G07000, AT1G12210, AT1G18570, AT1G33960, AT1G61120, AT1G66700, AT1G73805, AT1G74710, AT1G79680, AT2G23150, AT2G26440, AT2G45220, AT3G09830, AT3G12580, AT3G15352, AT3G26830, AT3G28930, AT3G50260, AT3G50480, AT3G50930, AT3G53180, AT3G54420, AT3G57240, AT4G10500, AT4G15760, AT4G37990, AT4G39950, AT5G01600, AT5G02490, AT5G24530, AT5G26920, AT5G57220
GO:0071456	cellular response to hypoxia	BP	17	21	4.68271e-14	AT1G05880, AT1G14540, AT1G19250, AT1G26380, AT1G26410, AT1G57630, AT2G23270, AT2G26150, AT2G26560, AT4G31970, AT4G37710, AT5G13320, AT5G25250, AT5G26920, AT5G57220, AT5G57510, AT5G64905
GO:0042742	defense response to bacterium	BP	56	257	2.84131e-13	AT1G02920, AT1G02930, AT1G08450, AT1G10170, AT1G18570, AT1G19250, AT1G31280, AT1G51890, AT1G66700, AT1G73260, AT1G73805, AT1G74710, AT1G80840, AT2G13810, AT2G19190, AT2G23150, AT2G38470, AT2G43120, AT2G47130, AT2G47730, AT3G01420, AT3G04720, AT3G09830, AT3G49110, AT3G49120, AT3G50260, AT3G53810, AT3G54640, AT3G56400, AT3G59700, AT4G02520, AT4G11470, AT4G12720, AT4G18360, AT4G19700, AT4G23130, AT4…
GO:0004364	glutathione transferase activity	MF	26	54	2.95046e-13	AT1G02920, AT1G02930, AT1G17170, AT1G17180, AT1G65820, AT1G69920, AT1G69930, AT1G74590, AT1G75270, AT1G78340, AT1G78380, AT2G02390, AT2G02930, AT2G29420, AT2G29460, AT2G29470, AT2G29480, AT2G29490, AT2G30870, AT2G47730, AT3G09270, AT4G02520, AT4G19880, AT5G02780, AT5G44990, AT5G62480
GO:0009407	toxin catabolic process	BP	21	38	5.24778e-12	AT1G02920, AT1G02930, AT1G17170, AT1G17180, AT1G69920, AT1G69930, AT1G74590, AT1G78340, AT1G78380, AT2G02390, AT2G02930, AT2G29420, AT2G29460, AT2G29470, AT2G29480, AT2G29490, AT2G30870, AT2G47730, AT3G09270, AT4G02520, AT5G62480
GO:0006979	response to oxidative stress	BP	50	225	2.56728e-11	AT1G02930, AT1G07400, AT1G07890, AT1G09970, AT1G13340, AT1G14540, AT1G14870, AT1G16420, AT1G19020, AT1G21520, AT1G27730, AT1G52200, AT1G72060, AT1G78380, AT1G78410, AT2G16500, AT2G21640, AT2G29500, AT2G37040, AT2G40000, AT3G01420, AT3G04120, AT3G20340, AT3G25250, AT3G28340, AT3G46090, AT3G49110, AT3G49120, AT4G02380, AT4G08770, AT4G08780, AT4G11280, AT4G11850, AT4G12720, AT4G17070, AT4G20830, AT4…
GO:0006855	drug transmembrane transport	BP	23	62	4.72279e-11	AT1G15520, AT1G30420, AT1G33110, AT1G58340, AT1G71140, AT2G04040, AT2G04050, AT2G04070, AT2G04100, AT2G34660, AT2G47000, AT2G47800, AT3G13080, AT3G13100, AT3G21690, AT3G23550, AT3G23560, AT3G59140, AT4G21903, AT4G23030, AT4G39030, AT5G52450, AT5G65380
GO:0006749	glutathione metabolic process	BP	23	52	7.77913e-11	AT1G02920, AT1G02930, AT1G17170, AT1G17180, AT1G69920, AT1G69930, AT1G74590, AT1G75270, AT1G78340, AT1G78380, AT2G02930, AT2G29420, AT2G29460, AT2G29470, AT2G29480, AT2G29490, AT2G30870, AT2G47730, AT3G09270, AT3G24170, AT4G02520, AT5G02780, AT5G62480
GO:0009751	response to salicylic acid	BP	35	136	9.53005e-10	AT1G05560, AT1G06180, AT1G15520, AT1G18570, AT1G21250, AT1G28480, AT1G43160, AT1G66700, AT1G73260, AT1G76680, AT1G79680, AT1G80840, AT2G03760, AT2G14560, AT2G29420, AT2G37710, AT2G40000, AT2G40750, AT2G46830, AT2G47190, AT3G01420, AT3G09600, AT3G50480, AT3G51440, AT3G56400, AT4G10500, AT4G23130, AT4G39030, AT5G08790, AT5G13330, AT5G24110, AT5G24530, AT5G40990, AT5G46050, AT5G54610
GO:0080043	quercetin 3-O-glucosyltransferase activity	MF	26	77	9.53005e-10	AT1G05560, AT1G05675, AT1G05680, AT1G07260, AT1G22400, AT2G15480, AT2G15490, AT2G30140, AT2G36750, AT2G36770, AT2G36780, AT2G36790, AT2G36800, AT2G36970, AT2G43820, AT3G11340, AT3G21780, AT3G46660, AT3G46690, AT3G53160, AT4G01070, AT4G15280, AT4G15550, AT4G34131, AT4G34135, AT5G03490
GO:0080044	quercetin 7-O-glucosyltransferase activity	MF	26	77	9.53005e-10	AT1G05560, AT1G05675, AT1G05680, AT1G07260, AT1G22400, AT2G15480, AT2G15490, AT2G30140, AT2G36750, AT2G36770, AT2G36780, AT2G36790, AT2G36800, AT2G36970, AT2G43820, AT3G11340, AT3G21780, AT3G46660, AT3G46690, AT3G53160, AT4G01070, AT4G15280, AT4G15550, AT4G34131, AT4G34135, AT5G03490
GO:0016491	oxidoreductase activity	MF	124	991	1.29447e-09	AT1G02400, AT1G05010, AT1G07890, AT1G12200, AT1G14540, AT1G16300, AT1G17020, AT1G17745, AT1G17990, AT1G18020, AT1G19250, AT1G26380, AT1G26390, AT1G26410, AT1G26420, AT1G30700, AT1G30730, AT1G32350, AT1G59950, AT1G60730, AT1G60740, AT1G64710, AT1G64940, AT1G64950, AT1G65970, AT1G72280, AT1G72680, AT1G76680, AT1G76690, AT1G78380, AT2G02390, AT2G17720, AT2G20800, AT2G24180, AT2G26400, AT2G29150, AT2…
GO:0055114	oxidation-reduction process	BP	140	1190	7.81886e-09	AT1G02400, AT1G03850, AT1G05010, AT1G07890, AT1G09480, AT1G09500, AT1G12200, AT1G14540, AT1G16300, AT1G17020, AT1G17745, AT1G17990, AT1G18020, AT1G19250, AT1G26380, AT1G26390, AT1G26410, AT1G26420, AT1G28480, AT1G30700, AT1G30730, AT1G32350, AT1G59950, AT1G60730, AT1G60740, AT1G64710, AT1G64940, AT1G64950, AT1G65970, AT1G69880, AT1G72280, AT1G72680, AT1G76680, AT1G76690, AT1G78380, AT2G02390, AT2…
GO:0009408	response to heat	BP	32	130	1.33271e-08	AT1G07400, AT1G07890, AT1G16030, AT1G52560, AT1G58340, AT1G59860, AT1G74310, AT2G25140, AT2G26150, AT2G29500, AT2G32120, AT2G33590, AT2G38470, AT3G04120, AT3G08720, AT3G08970, AT3G09350, AT3G09440, AT3G12580, AT3G24500, AT3G46230, AT4G12400, AT4G36990, AT5G02490, AT5G05410, AT5G09590, AT5G12020, AT5G12030, AT5G22060, AT5G47910, AT5G56010, AT5G59820
GO:0016758	transferase activity, transferring hexosyl groups	MF	27	94	1.82379e-08	AT1G05560, AT1G05675, AT1G05680, AT1G07260, AT1G22400, AT2G15480, AT2G15490, AT2G30140, AT2G36750, AT2G36770, AT2G36780, AT2G36790, AT2G36800, AT2G36970, AT2G43820, AT3G11340, AT3G21780, AT3G46660, AT3G46690, AT3G53160, AT4G01070, AT4G15270, AT4G15280, AT4G15550, AT4G34131, AT4G34135, AT5G03490
GO:0016740	transferase activity	MF	226	2438	8.23088e-08	AT1G01560, AT1G01680, AT1G02920, AT1G02930, AT1G05100, AT1G05560, AT1G05675, AT1G05680, AT1G05880, AT1G07260, AT1G10070, AT1G14370, AT1G15125, AT1G16670, AT1G17170, AT1G17180, AT1G17290, AT1G19020, AT1G21100, AT1G21110, AT1G21120, AT1G21130, AT1G21240, AT1G21250, AT1G22400, AT1G33030, AT1G35710, AT1G51660, AT1G51890, AT1G55450, AT1G55850, AT1G55920, AT1G56140, AT1G61360, AT1G61370, AT1G61420, AT1…
GO:0004674	protein serine/threonine kinase activity	MF	80	659	1.27398e-07	AT1G01560, AT1G05100, AT1G14370, AT1G16090, AT1G16670, AT1G21240, AT1G21250, AT1G35710, AT1G51660, AT1G51890, AT1G56120, AT1G56140, AT1G61360, AT1G61370, AT1G61420, AT1G65790, AT1G67520, AT1G69730, AT1G69790, AT1G71530, AT1G74360, AT1G79680, AT2G13790, AT2G17220, AT2G19190, AT2G23450, AT2G31880, AT2G37710, AT2G39660, AT3G08720, AT3G09010, AT3G13380, AT3G16030, AT3G20410, AT3G25250, AT3G25490, AT3…
GO:0009620	response to fungus	BP	21	68	1.54773e-07	AT1G05010, AT1G07000, AT1G51800, AT1G79680, AT2G39660, AT2G43580, AT2G45220, AT3G05360, AT3G06490, AT3G11820, AT3G16030, AT3G50470, AT3G50480, AT3G51440, AT4G02380, AT4G10500, AT4G16760, AT5G08790, AT5G24530, AT5G26920, AT5G40990
GO:0005886	plasma membrane	CC	217	2376	3.20034e-07	AT1G01340, AT1G02520, AT1G03220, AT1G05340, AT1G07000, AT1G07890, AT1G08050, AT1G09970, AT1G10140, AT1G12210, AT1G13210, AT1G14370, AT1G14870, AT1G14880, AT1G15520, AT1G16030, AT1G16670, AT1G21250, AT1G22280, AT1G23730, AT1G24140, AT1G26380, AT1G30070, AT1G34750, AT1G35230, AT1G47510, AT1G51760, AT1G51800, AT1G51890, AT1G52200, AT1G55850, AT1G56060, AT1G56120, AT1G56140, AT1G56145, AT1G60740, AT1…
GO:0004672	protein kinase activity	MF	91	824	5.06112e-07	AT1G01560, AT1G05100, AT1G09970, AT1G14370, AT1G16670, AT1G21240, AT1G21250, AT1G34420, AT1G35710, AT1G51620, AT1G51660, AT1G51790, AT1G51800, AT1G51890, AT1G56120, AT1G56140, AT1G56145, AT1G61360, AT1G61370, AT1G61420, AT1G65790, AT1G66880, AT1G67520, AT1G69730, AT1G69790, AT1G71530, AT1G74360, AT1G79680, AT2G13790, AT2G17220, AT2G19190, AT2G23450, AT2G31880, AT2G37710, AT2G39660, AT3G08720, AT3…
GO:0004601	peroxidase activity	MF	23	80	9.49985e-07	AT1G07890, AT1G14540, AT1G60740, AT1G65970, AT1G78380, AT2G02390, AT2G47730, AT3G01420, AT3G17790, AT3G49110, AT3G49120, AT4G02520, AT4G08770, AT4G08780, AT4G33420, AT4G37520, AT4G37530, AT5G05340, AT5G47910, AT5G51060, AT5G58390, AT5G64110, AT5G64120
GO:0006468	protein phosphorylation	BP	92	853	1.31142e-06	AT1G01560, AT1G05100, AT1G09970, AT1G14370, AT1G16090, AT1G16670, AT1G21240, AT1G21250, AT1G34420, AT1G35710, AT1G51620, AT1G51660, AT1G51790, AT1G51800, AT1G51890, AT1G56120, AT1G56140, AT1G56145, AT1G61360, AT1G61370, AT1G61420, AT1G65790, AT1G66880, AT1G67520, AT1G69730, AT1G69790, AT1G71530, AT1G74360, AT1G79680, AT2G13790, AT2G17220, AT2G19190, AT2G23450, AT2G31880, AT2G37710, AT2G39660, AT3…
GO:0035251	UDP-glucosyltransferase activity	MF	11	19	1.46827e-06	AT1G05560, AT1G05680, AT2G15480, AT2G15490, AT2G36750, AT2G36790, AT2G43820, AT4G01070, AT4G34131, AT4G34135, AT5G03490
GO:0020037	heme binding	MF	40	222	1.5098e-06	AT1G07890, AT1G14540, AT1G64940, AT1G64950, AT2G16060, AT2G24180, AT2G30750, AT2G30770, AT2G34500, AT2G37970, AT2G45570, AT3G01420, AT3G14620, AT3G14680, AT3G26200, AT3G26210, AT3G26830, AT3G28740, AT3G48310, AT3G49110, AT3G49120, AT3G51790, AT4G08770, AT4G08780, AT4G10040, AT4G22690, AT4G22710, AT4G31500, AT4G31970, AT4G33420, AT4G37370, AT4G37520, AT4G37530, AT4G39950, AT5G05340, AT5G57220, AT5…
GO:0015238	drug transmembrane transporter activity	MF	15	40	2.8888e-06	AT1G33110, AT1G58340, AT1G71140, AT2G04040, AT2G04050, AT2G04070, AT2G04100, AT3G21690, AT3G23550, AT3G23560, AT4G21903, AT4G23030, AT4G39030, AT5G52450, AT5G65380
GO:0016021	integral component of membrane	CC	368	4445	3.04914e-06	AT1G01010, AT1G01340, AT1G02520, AT1G03370, AT1G05575, AT1G08930, AT1G09970, AT1G10340, AT1G10990, AT1G11925, AT1G12200, AT1G13210, AT1G14360, AT1G14870, AT1G14880, AT1G15520, AT1G15790, AT1G16090, AT1G21240, AT1G21250, AT1G22890, AT1G23090, AT1G23830, AT1G23840, AT1G24145, AT1G24147, AT1G25400, AT1G29290, AT1G29330, AT1G30420, AT1G30620, AT1G30900, AT1G32350, AT1G32870, AT1G33110, AT1G34180, AT1…
GO:0009651	response to salt stress	BP	58	415	6.56767e-06	AT1G02920, AT1G02930, AT1G03220, AT1G06180, AT1G07890, AT1G08930, AT1G10170, AT1G18570, AT1G25220, AT1G27730, AT1G43160, AT1G47510, AT1G55450, AT1G59860, AT1G70170, AT1G73260, AT1G77510, AT2G03760, AT2G15390, AT2G16500, AT2G18190, AT2G26650, AT2G30250, AT2G37760, AT2G37770, AT2G38340, AT2G38470, AT2G46830, AT2G47190, AT2G47730, AT3G04120, AT3G04720, AT3G06490, AT3G08720, AT3G09350, AT3G09600, AT3…
GO:0042542	response to hydrogen peroxide	BP	17	54	7.58427e-06	AT1G16420, AT1G52560, AT1G73260, AT1G74310, AT2G26150, AT2G29500, AT2G32120, AT3G04120, AT3G12580, AT3G17790, AT4G02380, AT4G12400, AT5G01600, AT5G05410, AT5G12030, AT5G24110, AT5G58940
GO:0055085	transmembrane transport	BP	61	478	7.58427e-06	AT1G01340, AT1G02520, AT1G08930, AT1G14360, AT1G23090, AT1G30420, AT1G33110, AT1G58340, AT1G66570, AT1G71140, AT1G71880, AT1G76520, AT1G79410, AT2G02810, AT2G04040, AT2G04050, AT2G04070, AT2G04100, AT2G17500, AT2G26650, AT2G29410, AT2G34355, AT2G34660, AT2G36380, AT2G39210, AT2G46430, AT2G47000, AT2G47800, AT3G13080, AT3G13100, AT3G17700, AT3G18830, AT3G20660, AT3G21690, AT3G23550, AT3G23560, AT3…
GO:0098869	cellular oxidant detoxification	BP	28	127	1.04613e-05	AT1G07890, AT1G14540, AT1G60740, AT1G65820, AT1G65970, AT1G69880, AT1G75270, AT1G78380, AT2G02390, AT2G27660, AT2G47730, AT3G01420, AT3G17790, AT3G24170, AT3G49110, AT3G49120, AT4G02520, AT4G08770, AT4G08780, AT4G33420, AT4G37520, AT4G37530, AT5G05340, AT5G47910, AT5G51060, AT5G58390, AT5G64110, AT5G64120
GO:0051707	response to other organism	BP	10	19	1.17914e-05	AT1G19250, AT2G04450, AT2G15480, AT2G15490, AT2G35980, AT3G13100, AT3G53160, AT4G34131, AT4G34135, AT5G61210
GO:0043295	glutathione binding	MF	8	11	1.70501e-05	AT1G02920, AT1G02930, AT1G17170, AT1G75270, AT1G78380, AT2G30870, AT2G47730, AT4G02520
GO:0005524	ATP binding	MF	165	1957	2.41857e-05	AT1G01560, AT1G02520, AT1G04280, AT1G05100, AT1G09080, AT1G09970, AT1G11100, AT1G12210, AT1G13210, AT1G14370, AT1G15520, AT1G16030, AT1G16670, AT1G17290, AT1G21240, AT1G21250, AT1G23100, AT1G30420, AT1G34420, AT1G35710, AT1G43910, AT1G51380, AT1G51620, AT1G51660, AT1G51790, AT1G51800, AT1G51890, AT1G56120, AT1G56140, AT1G56145, AT1G61360, AT1G61370, AT1G61420, AT1G63440, AT1G65790, AT1G66880, AT1…
GO:0005576	extracellular region	CC	72	577	2.90616e-05	AT1G09560, AT1G14540, AT1G21310, AT1G26380, AT1G26390, AT1G26410, AT1G26420, AT1G29290, AT1G30700, AT1G30730, AT1G32940, AT1G32950, AT1G32960, AT1G62760, AT1G68765, AT1G75040, AT1G75830, AT1G78850, AT2G02990, AT2G04160, AT2G05380, AT2G14610, AT2G14620, AT2G18660, AT2G26010, AT2G26020, AT2G26440, AT2G43510, AT2G43870, AT2G45220, AT2G47550, AT3G09405, AT3G12220, AT3G13790, AT3G15356, AT3G16530, AT3…
GO:0008559	xenobiotic-transporting ATPase activity	MF	7	14	5.08122e-05	AT1G30420, AT2G34660, AT2G47000, AT2G47800, AT3G13080, AT3G13100, AT3G59140
GO:0042908	xenobiotic transport	BP	7	14	5.08122e-05	AT1G30420, AT2G34660, AT2G47000, AT2G47800, AT3G13080, AT3G13100, AT3G59140
GO:0046686	response to cadmium ion	BP	46	321	5.63836e-05	AT1G02920, AT1G02930, AT1G07890, AT1G17290, AT1G67070, AT1G70170, AT1G75040, AT1G76680, AT1G77510, AT1G78380, AT2G26560, AT2G30870, AT2G32240, AT2G33590, AT2G37760, AT2G41380, AT2G46830, AT2G47190, AT3G04120, AT3G08590, AT3G09270, AT3G09440, AT3G09600, AT3G12500, AT3G12580, AT3G14990, AT3G44300, AT3G48990, AT3G53230, AT4G02520, AT4G16760, AT4G19880, AT4G21680, AT4G25200, AT4G37910, AT4G39230, AT5…
GO:0005618	cell wall	CC	58	447	5.73388e-05	AT1G02930, AT1G03220, AT1G07890, AT1G09560, AT1G16030, AT1G17860, AT1G21310, AT1G26380, AT1G26390, AT1G26410, AT1G26420, AT1G30700, AT1G30730, AT1G32940, AT1G33600, AT1G75040, AT1G78850, AT2G02990, AT2G04160, AT2G14610, AT2G14620, AT2G16060, AT2G18660, AT2G26440, AT2G30870, AT2G45220, AT2G47550, AT3G03060, AT3G09405, AT3G09440, AT3G12580, AT3G13790, AT3G15356, AT3G16530, AT3G22060, AT3G48580, AT3…
GO:0006032	chitin catabolic process	BP	9	17	0.000103872	AT1G02360, AT2G43570, AT2G43580, AT2G43590, AT3G12500, AT3G47540, AT3G54420, AT4G01700, AT4G19810
GO:0016301	kinase activity	MF	103	1083	0.00016951	AT1G01560, AT1G04280, AT1G05100, AT1G09970, AT1G14370, AT1G16090, AT1G16670, AT1G21240, AT1G21250, AT1G34420, AT1G35710, AT1G51620, AT1G51660, AT1G51790, AT1G51800, AT1G51890, AT1G56120, AT1G56140, AT1G56145, AT1G61360, AT1G61370, AT1G61420, AT1G61640, AT1G65790, AT1G66880, AT1G67520, AT1G69730, AT1G69790, AT1G71530, AT1G74360, AT1G79680, AT2G13790, AT2G17220, AT2G19190, AT2G23450, AT2G31880, AT2…
GO:0009611	response to wounding	BP	29	169	0.000181554	AT1G01720, AT1G16090, AT1G27730, AT1G32920, AT1G43160, AT1G51760, AT1G61120, AT1G73260, AT1G74020, AT1G76680, AT1G76690, AT1G80840, AT2G02990, AT2G47800, AT3G13790, AT3G15356, AT3G25250, AT3G51440, AT3G54420, AT4G02380, AT4G11280, AT4G16760, AT4G24350, AT5G05730, AT5G08790, AT5G46050, AT5G47910, AT5G50200, AT5G59820
GO:0016998	cell wall macromolecule catabolic process	BP	8	14	0.000206281	AT1G02360, AT2G43570, AT2G43580, AT2G43590, AT3G12500, AT3G47540, AT3G54420, AT4G01700
GO:0015297	antiporter activity	MF	21	103	0.000276229	AT1G14360, AT1G33110, AT1G58340, AT1G71140, AT2G02810, AT2G04040, AT2G04050, AT2G04070, AT2G04100, AT3G21690, AT3G23550, AT3G23560, AT4G21903, AT4G23030, AT4G23700, AT4G39030, AT5G09470, AT5G17860, AT5G41610, AT5G52450, AT5G65380
GO:0016310	phosphorylation	BP	103	1093	0.000301686	AT1G01560, AT1G04280, AT1G05100, AT1G09970, AT1G14370, AT1G16090, AT1G16670, AT1G21240, AT1G21250, AT1G34420, AT1G35710, AT1G51620, AT1G51660, AT1G51790, AT1G51800, AT1G51890, AT1G56120, AT1G56140, AT1G56145, AT1G61360, AT1G61370, AT1G61420, AT1G61640, AT1G65790, AT1G66880, AT1G67520, AT1G69730, AT1G69790, AT1G71530, AT1G74360, AT1G79680, AT2G13790, AT2G17220, AT2G19190, AT2G23450, AT2G31880, AT2…
GO:0016709	oxidoreductase activity, acting on paired donors, with incorporation or reduction of molecular oxygen, NAD(P)H as one donor, and incorporation of one atom of oxygen	MF	19	86	0.000341017	AT1G64940, AT1G64950, AT2G24180, AT2G30750, AT2G30770, AT2G45570, AT3G26200, AT3G26210, AT3G26830, AT3G28740, AT3G48310, AT4G22690, AT4G22710, AT4G31500, AT4G31970, AT4G37370, AT4G39950, AT5G57220, AT5G67310
GO:0009626	plant-type hypersensitive response	BP	16	68	0.00043204	AT1G08450, AT1G19250, AT1G51660, AT1G73805, AT2G01180, AT2G26560, AT2G47130, AT3G01420, AT3G12500, AT3G50470, AT3G50480, AT3G50930, AT4G12720, AT4G23210, AT5G13320, AT5G26920
GO:0002237	response to molecule of bacterial origin	BP	9	22	0.000451814	AT1G07000, AT1G16670, AT1G51800, AT1G73260, AT1G80840, AT3G05360, AT3G50930, AT4G23210, AT5G26920
GO:0016887	ATPase activity	MF	28	206	0.000532168	AT1G02520, AT1G15520, AT1G30420, AT1G43910, AT1G67120, AT2G18190, AT2G18193, AT2G34660, AT2G36380, AT2G46620, AT2G47000, AT2G47800, AT3G13080, AT3G13100, AT3G28510, AT3G28540, AT3G28580, AT3G47780, AT3G50930, AT3G59140, AT3G62150, AT4G15233, AT4G18050, AT5G40010, AT5G51070, AT5G56030, AT5G57480, AT5G60730
GO:0009737	response to abscisic acid	BP	46	351	0.000548716	AT1G01560, AT1G05100, AT1G08930, AT1G18570, AT1G27730, AT1G43160, AT1G43910, AT1G47510, AT1G58340, AT1G63840, AT1G65690, AT2G32020, AT2G32240, AT2G33590, AT2G40340, AT2G46830, AT2G47190, AT3G01420, AT3G06490, AT3G09600, AT3G11820, AT3G21780, AT3G22060, AT3G24500, AT3G26830, AT3G28210, AT3G28580, AT3G53180, AT4G02380, AT4G04490, AT4G11890, AT4G13510, AT4G18010, AT4G19810, AT5G01540, AT5G13330, AT5…
GO:0005516	calmodulin binding	MF	27	182	0.000565427	AT1G01340, AT1G61360, AT1G61370, AT1G61420, AT1G61560, AT1G73805, AT2G02010, AT2G23320, AT2G34660, AT2G46430, AT2G47190, AT3G16030, AT3G17700, AT3G20410, AT3G22910, AT3G49370, AT3G63380, AT4G01010, AT4G21390, AT4G27300, AT4G30490, AT4G33050, AT4G37640, AT5G17330, AT5G26920, AT5G48570, AT5G58940
GO:0004568	chitinase activity	MF	8	16	0.000606809	AT1G02360, AT2G43570, AT2G43580, AT2G43590, AT3G12500, AT3G47540, AT3G54420, AT4G01700
GO:0000166	nucleotide binding	MF	157	1915	0.000995476	AT1G01340, AT1G01560, AT1G02520, AT1G05100, AT1G09080, AT1G12210, AT1G13210, AT1G14370, AT1G15520, AT1G16030, AT1G16670, AT1G21240, AT1G21250, AT1G26380, AT1G26390, AT1G26410, AT1G26420, AT1G30420, AT1G30700, AT1G30730, AT1G30960, AT1G33960, AT1G35710, AT1G43910, AT1G51380, AT1G51660, AT1G51890, AT1G56140, AT1G61360, AT1G61370, AT1G61420, AT1G63440, AT1G65790, AT1G67120, AT1G67520, AT1G69730, AT1…
GO:0019438	aromatic compound biosynthetic process	BP	5	6	0.00126567	AT1G21100, AT1G21110, AT1G21120, AT1G21130, AT1G33030
GO:0008061	chitin binding	MF	8	18	0.00126966	AT2G17120, AT2G43570, AT2G43580, AT2G43590, AT3G04720, AT3G12500, AT3G54420, AT4G19810
GO:0031640	killing of cells of other organism	BP	9	22	0.00126966	AT1G75830, AT2G26010, AT2G26020, AT2G43510, AT3G04720, AT3G12500, AT5G44420, AT5G44430, AT5G46871
GO:0042626	ATPase activity, coupled to transmembrane movement of substances	MF	14	76	0.00171892	AT1G02520, AT1G15520, AT1G30420, AT2G34660, AT2G36380, AT2G47000, AT2G47800, AT3G13080, AT3G13100, AT3G47780, AT3G59140, AT3G62150, AT4G15233, AT4G18050
GO:0044550	secondary metabolite biosynthetic process	BP	17	81	0.00208655	AT1G64940, AT1G64950, AT2G24180, AT2G29720, AT2G30750, AT2G45570, AT3G26200, AT3G26210, AT3G28740, AT3G48310, AT4G15760, AT4G22690, AT4G22710, AT4G31970, AT4G37370, AT4G38540, AT5G67310
GO:0042744	hydrogen peroxide catabolic process	BP	13	48	0.00213401	AT1G07890, AT1G14540, AT3G49110, AT3G49120, AT4G08770, AT4G08780, AT4G33420, AT4G37520, AT4G37530, AT5G05340, AT5G58390, AT5G64110, AT5G64120
GO:0002229	defense response to oomycetes	BP	9	27	0.00244874	AT1G15520, AT1G73805, AT3G23550, AT3G59700, AT4G10500, AT4G39950, AT5G24530, AT5G26920, AT5G65600
GO:0000162	tryptophan biosynthetic process	BP	8	20	0.00313261	AT1G25220, AT2G04400, AT3G54640, AT4G27070, AT4G31500, AT5G05730, AT5G17990, AT5G54810
GO:0009615	response to virus	BP	10	35	0.00335706	AT1G16030, AT1G21250, AT1G75040, AT2G43570, AT3G04720, AT3G09440, AT3G12580, AT3G51440, AT5G02490, AT5G09590
GO:0004497	monooxygenase activity	MF	27	175	0.00336726	AT1G12200, AT1G19250, AT1G64940, AT1G64950, AT2G24180, AT2G29720, AT2G30750, AT2G34500, AT2G45570, AT3G14620, AT3G14680, AT3G26200, AT3G26210, AT3G26830, AT3G28740, AT3G48310, AT4G15760, AT4G22690, AT4G22710, AT4G31500, AT4G31970, AT4G37370, AT4G38540, AT4G39950, AT5G35320, AT5G57220, AT5G67310
GO:0008152	metabolic process	BP	77	752	0.00378832	AT1G02850, AT1G05560, AT1G05675, AT1G05680, AT1G07260, AT1G08940, AT1G10070, AT1G17745, AT1G22400, AT1G25220, AT1G51760, AT1G55450, AT1G61120, AT1G61810, AT1G65610, AT1G68620, AT1G69520, AT2G04400, AT2G14620, AT2G15480, AT2G15490, AT2G26560, AT2G30140, AT2G36750, AT2G36770, AT2G36780, AT2G36790, AT2G36800, AT2G36970, AT2G41380, AT2G43570, AT2G43580, AT2G43590, AT2G43820, AT2G43870, AT2G44460, AT2…
GO:0016020	membrane	CC	424	5587	0.00484118	AT1G01010, AT1G01340, AT1G02520, AT1G03220, AT1G03370, AT1G04280, AT1G08930, AT1G09970, AT1G10340, AT1G10990, AT1G11925, AT1G12200, AT1G13210, AT1G14360, AT1G14370, AT1G14870, AT1G14880, AT1G15520, AT1G15790, AT1G16030, AT1G16670, AT1G21240, AT1G21250, AT1G23090, AT1G23730, AT1G23830, AT1G23840, AT1G24140, AT1G25400, AT1G26380, AT1G29290, AT1G29330, AT1G30420, AT1G30620, AT1G30900, AT1G32350, AT1…
GO:0052033	pathogen-associated molecular pattern dependent induction by symbiont of host innate immune response	BP	5	8	0.00557667	AT2G39660, AT3G09830, AT3G49110, AT3G49120, AT5G01540
GO:0005509	calcium ion binding	MF	28	195	0.00583407	AT1G08450, AT1G21240, AT1G21250, AT1G21550, AT1G30900, AT1G69730, AT1G79680, AT2G20800, AT2G41100, AT2G41410, AT3G01830, AT3G20410, AT3G29000, AT3G47480, AT4G05020, AT4G11840, AT4G11850, AT4G17615, AT4G20110, AT4G20780, AT4G26470, AT4G37010, AT5G39670, AT5G42380, AT5G47910, AT5G49480, AT5G51060, AT5G54490
GO:0009816	defense response to bacterium, incompatible interaction	BP	10	38	0.0058364	AT2G40000, AT3G05200, AT3G56710, AT4G11650, AT4G23190, AT5G13320, AT5G26920, AT5G27420, AT5G52640, AT5G56030
GO:0016614	oxidoreductase activity, acting on CH-OH group of donors	MF	11	46	0.0062184	AT1G26380, AT1G26390, AT1G26410, AT1G26420, AT1G30700, AT1G30730, AT4G20830, AT4G20860, AT4G29740, AT5G20960, AT5G44390
GO:0010224	response to UV-B	BP	13	57	0.00658671	AT1G05880, AT1G32870, AT1G35210, AT1G66580, AT1G73805, AT1G75040, AT2G01180, AT2G36750, AT2G37040, AT3G17609, AT5G05410, AT5G26920, AT5G59820
GO:0002238	response to molecule of fungal origin	BP	6	13	0.00905816	AT1G07000, AT1G51800, AT1G66700, AT1G73260, AT3G05360, AT3G19260
GO:0009753	response to jasmonic acid	BP	23	146	0.00933609	AT1G06160, AT1G06180, AT1G15520, AT1G18570, AT1G43160, AT1G47510, AT1G61120, AT1G70170, AT1G74020, AT2G39030, AT2G46830, AT3G06490, AT3G09600, AT3G50480, AT3G51440, AT3G56400, AT4G11280, AT4G19810, AT4G20860, AT5G08790, AT5G13330, AT5G44420, AT5G46050
GO:0009414	response to water deprivation	BP	32	249	0.0189963	AT1G02930, AT1G07000, AT1G08930, AT1G27730, AT1G43160, AT1G52890, AT2G14610, AT2G26650, AT2G30870, AT2G33590, AT2G37760, AT2G37770, AT2G38340, AT2G38470, AT2G47190, AT2G47800, AT3G15500, AT3G24500, AT3G26830, AT4G02380, AT4G11890, AT4G17615, AT4G39950, AT5G05410, AT5G13330, AT5G13750, AT5G20830, AT5G26340, AT5G38710, AT5G40010, AT5G56030, AT5G59220
GO:0009625	response to insect	BP	8	27	0.0211736	AT1G16670, AT1G18570, AT1G73260, AT1G74080, AT3G26830, AT4G02380, AT4G39950, AT5G44420
GO:0016705	oxidoreductase activity, acting on paired donors, with incorporation or reduction of molecular oxygen	MF	23	157	0.0214478	AT1G64940, AT1G64950, AT2G17720, AT2G24180, AT2G30750, AT2G30770, AT2G34500, AT2G45570, AT3G14620, AT3G14680, AT3G26200, AT3G26210, AT3G26830, AT3G28740, AT3G48310, AT4G22690, AT4G22710, AT4G31500, AT4G31970, AT4G37370, AT4G39950, AT5G57220, AT5G67310
GO:0047893	flavonol 3-O-glucosyltransferase activity	MF	5	10	0.0219991	AT2G15480, AT2G15490, AT3G46660, AT4G34131, AT4G34135
GO:0046244	salicylic acid catabolic process	BP	3	3	0.0239198	AT2G37040, AT4G10500, AT5G24530
GO:0050403	trans-zeatin O-beta-D-glucosyltransferase activity	MF	3	3	0.0239198	AT1G22400, AT2G36750, AT2G36800
GO:0050502	cis-zeatin O-beta-D-glucosyltransferase activity	MF	3	3	0.0239198	AT1G22400, AT2G36750, AT2G36800
GO:0008171	O-methyltransferase activity	MF	6	15	0.028591	AT1G21100, AT1G21110, AT1G21120, AT1G21130, AT1G33030, AT1G67980
GO:0080167	response to karrikin	BP	19	118	0.028591	AT1G05680, AT1G61800, AT1G71100, AT2G37040, AT2G44460, AT2G47730, AT3G09440, AT3G13790, AT3G17609, AT3G44720, AT4G02940, AT4G13510, AT4G35110, AT4G37290, AT4G37370, AT5G13750, AT5G18470, AT5G40780, AT5G48540
GO:0034605	cellular response to heat	BP	7	22	0.0301037	AT1G43160, AT2G26150, AT2G30250, AT2G38340, AT2G38470, AT3G08970, AT4G25380
GO:0016757	transferase activity, transferring glycosyl groups	MF	47	454	0.0308264	AT1G05560, AT1G05675, AT1G05680, AT1G07260, AT1G22400, AT1G55850, AT1G68390, AT1G73810, AT1G77810, AT2G03360, AT2G15390, AT2G15480, AT2G15490, AT2G30140, AT2G36750, AT2G36770, AT2G36780, AT2G36790, AT2G36800, AT2G36970, AT2G37980, AT2G41640, AT2G43820, AT3G10320, AT3G11340, AT3G21780, AT3G26440, AT3G28340, AT3G46660, AT3G46690, AT3G53160, AT3G57380, AT4G00700, AT4G01070, AT4G01750, AT4G02390, AT4…
GO:0009873	ethylene-activated signaling pathway	BP	21	139	0.031547	AT1G06160, AT1G43160, AT1G62300, AT1G71520, AT2G31230, AT2G33710, AT2G47520, AT3G15356, AT3G23230, AT3G23240, AT3G24500, AT3G25730, AT3G50260, AT3G61630, AT4G06746, AT4G17500, AT4G39780, AT5G13330, AT5G40990, AT5G47220, AT5G64750
GO:0010150	leaf senescence	BP	14	79	0.0316421	AT1G17020, AT1G69490, AT2G13810, AT2G35980, AT2G43000, AT2G43570, AT3G10500, AT3G11340, AT4G02380, AT4G10500, AT4G16690, AT5G08790, AT5G11520, AT5G59220
GO:0002239	response to oomycetes	BP	4	7	0.0327102	AT1G51800, AT3G16530, AT4G10500, AT5G24530
GO:0009697	salicylic acid biosynthetic process	BP	4	7	0.0331107	AT1G10170, AT1G74710, AT4G39030, AT5G26920
GO:0050660	flavin adenine dinucleotide binding	MF	16	102	0.0416855	AT1G12200, AT1G19250, AT1G26380, AT1G26390, AT1G26410, AT1G26420, AT1G30700, AT1G30730, AT3G24170, AT4G16760, AT4G20830, AT4G20860, AT4G29740, AT5G03630, AT5G20960, AT5G44390
GO:0042343	indole glucosinolate metabolic process	BP	6	17	0.0456628	AT1G21100, AT1G21120, AT3G28740, AT4G37370, AT5G57220, AT5G67310
GO:0009835	fruit ripening	BP	4	7	0.0476044	AT1G01480, AT1G05010, AT1G69490, AT4G11280
H2O+PQ_vs_H2O+H2O H2O+H2O up
category	term	ontology	numDEInCat	numInCat	FDR	gene_ids
GO:0040008	regulation of growth	BP	16	100	1.44562e-11	AT1G26945, AT1G29430, AT1G29440, AT1G29450, AT1G29460, AT1G29500, AT1G61795, AT2G26710, AT2G42870, AT4G34760, AT5G18010, AT5G18020, AT5G18030, AT5G18050, AT5G18080, AT5G39860
GO:0009733	response to auxin	BP	20	210	1.23888e-10	AT1G04240, AT1G29430, AT1G29440, AT1G29450, AT1G29460, AT1G29500, AT3G03820, AT3G03840, AT3G03850, AT4G14550, AT4G14560, AT4G32280, AT4G34760, AT4G38840, AT4G38860, AT5G18010, AT5G18020, AT5G18030, AT5G18050, AT5G18080
GO:0009734	auxin-activated signaling pathway	BP	17	152	3.97268e-10	AT1G04240, AT1G23080, AT1G29430, AT1G29440, AT1G29450, AT1G29460, AT1G29500, AT4G14550, AT4G14560, AT4G32280, AT4G34760, AT5G12050, AT5G18010, AT5G18020, AT5G18030, AT5G18050, AT5G18080
GO:0010287	plastoglobule	CC	11	82	1.64696e-06	AT2G05070, AT2G05100, AT2G34430, AT3G08940, AT3G27690, AT4G19170, AT5G54270, ATCG00120, ATCG00340, ATCG00350, ATCG00480
GO:0016168	chlorophyll binding	MF	8	35	3.57475e-06	AT2G05070, AT2G05100, AT2G34430, AT3G08940, AT3G27690, AT5G54270, ATCG00340, ATCG00350
GO:0009522	photosystem I	CC	8	38	6.03386e-06	AT2G05070, AT2G05100, AT2G34430, AT3G08940, AT3G27690, AT5G54270, ATCG00340, ATCG00350
GO:0046620	regulation of organ growth	BP	5	8	6.76778e-06	AT1G29430, AT1G29440, AT1G29450, AT1G29460, AT1G29500
GO:0009769	photosynthesis, light harvesting in photosystem II	BP	4	4	1.06556e-05	AT2G05070, AT2G05100, AT3G27690, AT5G54270
GO:0018298	protein-chromophore linkage	BP	8	46	1.28496e-05	AT2G05070, AT2G05100, AT2G34430, AT3G08940, AT3G27690, AT5G54270, ATCG00340, ATCG00350
GO:0031409	pigment binding	MF	6	21	4.3974e-05	AT2G05070, AT2G05100, AT2G34430, AT3G08940, AT3G27690, AT5G54270
GO:0009765	photosynthesis, light harvesting	BP	6	22	4.99417e-05	AT2G05070, AT2G05100, AT2G34430, AT3G08940, AT3G27690, AT5G54270
GO:0009768	photosynthesis, light harvesting in photosystem I	BP	6	22	4.99417e-05	AT2G05070, AT2G05100, AT2G34430, AT3G08940, AT3G27690, AT5G54270
GO:0015979	photosynthesis	BP	11	142	0.000160242	AT2G05070, AT2G05100, AT2G30790, AT2G34430, AT3G08940, AT3G27690, AT5G38420, AT5G54190, AT5G54270, ATCG00340, ATCG00350
GO:0010114	response to red light	BP	7	52	0.000500701	AT1G15550, AT2G05070, AT2G05100, AT3G08940, AT3G27690, AT4G32280, AT5G38420
GO:0030104	water homeostasis	BP	4	9	0.000507157	AT2G05070, AT2G05100, AT3G27690, AT4G20140
GO:1903428	positive regulation of reactive oxygen species biosynthetic process	BP	3	3	0.000507157	AT2G05070, AT2G05100, AT3G27690
GO:0009535	chloroplast thylakoid membrane	CC	16	374	0.000895233	AT1G29395, AT1G51400, AT2G05070, AT2G05100, AT2G10940, AT2G30790, AT2G34430, AT3G08940, AT3G27690, AT3G46780, AT5G54270, ATCG00120, ATCG00130, ATCG00340, ATCG00350, ATCG00480
GO:0009926	auxin polar transport	BP	6	42	0.000908872	AT1G23080, AT1G29430, AT1G29440, AT1G29450, AT1G29460, AT1G29500
GO:0009534	chloroplast thylakoid	CC	12	211	0.000908872	AT2G05070, AT2G30790, AT2G34430, AT3G08940, AT3G46780, AT5G54190, AT5G54270, ATCG00120, ATCG00130, ATCG00340, ATCG00350, ATCG00480
GO:0009523	photosystem II	CC	7	58	0.000908872	AT2G05070, AT2G05100, AT2G30790, AT2G34430, AT3G08940, AT3G27690, AT5G54270
GO:0010218	response to far red light	BP	6	46	0.00194956	AT2G05070, AT2G05100, AT3G08940, AT3G27690, AT4G32280, AT5G38420
GO:0009517	PSII associated light-harvesting complex II	CC	3	5	0.00363054	AT2G05070, AT2G05100, AT3G27690
GO:0009579	thylakoid	CC	14	364	0.010203	AT2G05070, AT2G05100, AT2G30790, AT2G34430, AT3G08940, AT3G27690, AT3G46780, AT5G38420, AT5G54270, ATCG00120, ATCG00130, ATCG00340, ATCG00350, ATCG00480
GO:0009409	response to cold	BP	12	282	0.0105157	AT1G09350, AT2G05070, AT2G05100, AT2G42530, AT2G42540, AT3G27690, AT4G25480, AT4G25490, AT4G38840, AT5G20630, ATCG00120, ATCG00480
GO:0009631	cold acclimation	BP	5	43	0.0210859	AT1G29395, AT2G42530, AT2G42540, AT4G25480, AT4G25490
GO:0009645	response to low light intensity stimulus	BP	3	10	0.0354371	AT2G05070, AT2G05100, AT3G27690

## Sheet: SF+PQ_vs_H2O+H2O.goseq
SF+PQ_vs_H2O+H2O SF+PQ up
category	term	ontology	numDEInCat	numInCat	FDR	gene_ids
SF+PQ_vs_H2O+H2O H2O+H2O up
category	term	ontology	numDEInCat	numInCat	FDR	gene_ids
GO:0003700	transcription factor activity, sequence-specific DNA binding	MF	39	1074	1.78985e-05	AT1G13260, AT1G21910, AT1G25550, AT1G25560, AT1G49130, AT1G68190, AT1G68520, AT1G68840, AT1G69490, AT1G74840, AT1G75490, AT1G77640, AT1G79700, AT2G25900, AT2G36080, AT3G04070, AT3G07650, AT3G15500, AT3G19580, AT3G29035, AT3G46600, AT3G50060, AT4G01250, AT4G18170, AT4G27410, AT4G28140, AT4G32280, AT4G37260, AT4G39070, AT5G17490, AT5G21960, AT5G28770, AT5G39610, AT5G44260, AT5G49450, AT5G59820, AT5…
GO:0009611	response to wounding	BP	14	169	5.71954e-05	AT1G52030, AT1G73500, AT2G32800, AT2G34810, AT3G16470, AT3G17860, AT3G29035, AT3G48360, AT3G61060, AT4G35770, AT5G24770, AT5G54170, AT5G59820, AT5G67480
GO:0009753	response to jasmonic acid	BP	13	146	0.000106451	AT1G21910, AT1G74840, AT2G34810, AT2G39030, AT3G09940, AT3G16470, AT3G48360, AT4G35770, AT4G37260, AT5G24770, AT5G24780, AT5G44420, AT5G67480
GO:0070413	trehalose metabolism in response to stress	BP	4	8	0.000299558	AT1G23870, AT1G60140, AT1G70290, AT2G18700
GO:0030162	regulation of proteolysis	BP	6	23	0.000299558	AT1G15670, AT1G80440, AT3G48360, AT4G37610, AT5G63160, AT5G67480
GO:0009873	ethylene-activated signaling pathway	BP	12	139	0.000330621	AT1G13260, AT1G21910, AT1G25560, AT1G68840, AT1G73500, AT1G77640, AT1G79700, AT4G28140, AT5G21960, AT5G61590, AT5G61600, AT5G67190
GO:0005576	extracellular region	CC	24	577	0.000494992	AT1G02640, AT1G32170, AT1G53830, AT1G72260, AT2G15880, AT2G26020, AT2G27500, AT2G34810, AT2G43530, AT3G13750, AT3G49780, AT3G55500, AT3G59930, AT4G08950, AT4G19420, AT4G24230, AT4G38400, AT5G06870, AT5G44420, AT5G44430, AT5G49360, AT5G56870, AT5G57560, AT5G64260
GO:0006355	regulation of transcription, DNA-templated	BP	45	1692	0.000494992	AT1G13260, AT1G21910, AT1G25550, AT1G25560, AT1G49130, AT1G68190, AT1G68520, AT1G68840, AT1G69490, AT1G74840, AT1G75490, AT1G77640, AT1G79700, AT2G25900, AT2G36050, AT2G36080, AT2G42870, AT3G04070, AT3G07650, AT3G15500, AT3G17860, AT3G19580, AT3G29035, AT3G46600, AT3G48360, AT4G01250, AT4G18170, AT4G27410, AT4G28140, AT4G32280, AT4G37260, AT4G37610, AT4G39070, AT5G17490, AT5G21960, AT5G28770, AT5…
GO:2000762	regulation of phenylpropanoid metabolic process	BP	4	7	0.000494992	AT1G15670, AT1G80440, AT2G44130, AT3G59940
GO:0043565	sequence-specific DNA binding	MF	20	442	0.000865512	AT1G21910, AT1G68840, AT1G74840, AT1G75490, AT1G79700, AT3G04070, AT3G19580, AT3G29035, AT3G46600, AT3G50060, AT4G01250, AT4G18170, AT4G27410, AT4G37260, AT4G39070, AT5G17490, AT5G39610, AT5G49450, AT5G59820, AT5G61590
GO:0003712	transcription cofactor activity	MF	5	20	0.00148683	AT2G42870, AT3G48360, AT4G37610, AT5G63160, AT5G67480
GO:0010200	response to chitin	BP	10	116	0.00200539	AT1G75490, AT3G19580, AT3G46600, AT3G50060, AT4G01250, AT4G28140, AT4G37260, AT4G37610, AT4G39070, AT5G59820
GO:0019005	SCF ubiquitin ligase complex	CC	6	46	0.00740295	AT1G15670, AT1G80440, AT3G48360, AT4G37610, AT5G63160, AT5G67480
GO:0009741	response to brassinosteroid	BP	5	27	0.00740295	AT1G13260, AT2G26710, AT4G08950, AT4G39070, AT5G57560
GO:0031640	killing of cells of other organism	BP	5	22	0.00915191	AT2G26020, AT2G43530, AT3G59930, AT5G44420, AT5G44430
GO:0080167	response to karrikin	BP	9	118	0.0106147	AT1G06520, AT2G36080, AT2G39980, AT3G45060, AT3G57520, AT4G33980, AT4G39070, AT5G20250, AT5G42900
GO:0005992	trehalose biosynthetic process	BP	4	18	0.0160409	AT1G23870, AT1G60140, AT1G70290, AT2G18700
GO:0042542	response to hydrogen peroxide	BP	6	54	0.0204415	AT3G29035, AT3G48360, AT4G37610, AT5G39610, AT5G63160, AT5G67480
GO:0080037	negative regulation of cytokinin-activated signaling pathway	BP	3	6	0.0204415	AT1G15670, AT1G80440, AT3G59940
GO:0009751	response to salicylic acid	BP	9	136	0.0221913	AT1G21910, AT1G74840, AT2G40000, AT3G48360, AT3G50060, AT4G37260, AT4G37610, AT5G63160, AT5G67480
GO:0005975	carbohydrate metabolic process	BP	14	363	0.0328012	AT1G02640, AT1G13700, AT1G32170, AT1G52400, AT2G27500, AT3G13750, AT3G57520, AT5G18670, AT5G20250, AT5G21170, AT5G24420, AT5G49360, AT5G56870, AT5G57560
GO:0050832	defense response to fungus	BP	10	187	0.0339411	AT1G52400, AT1G52410, AT2G15890, AT2G26020, AT2G43530, AT3G59930, AT4G24230, AT5G44420, AT5G44430, AT5G61600
GO:0004657	proline dehydrogenase activity	MF	2	2	0.0339411	AT3G30775, AT5G38710
GO:0006562	proline catabolic process	BP	2	2	0.0339411	AT3G30775, AT5G38710
GO:0042787	protein ubiquitination involved in ubiquitin-dependent protein catabolic process	BP	7	91	0.0339411	AT1G15670, AT1G80440, AT3G48360, AT4G03510, AT4G37610, AT5G63160, AT5G67480
GO:0006979	response to oxidative stress	BP	11	225	0.0472793	AT2G40000, AT3G10020, AT3G30775, AT3G57520, AT4G21830, AT4G35770, AT5G20250, AT5G24770, AT5G39610, AT5G56550, AT5G59820
