# Supplementary material for: A Biostimulant Obtained from the Seaweed Ascophyllum nodosum Protects Arabidopsis thaliana from Severe Oxidative Stress
Source: Int J Mol Sci. 2020 Jan 11;21(2):474. doi: 10.3390/ijms21020474 (PMC7013732; doi:10.3390/ijms21020474)
Supplement: Supplementary file 1 [file ijms-21-00474-s001.zip › Data.S4.xlsx]

## Sheet: mehterov.2012.ROS_marker_genes
	Average TMM values				log2FC for significantly differentially expressed genes					Annotation
Gene ID	H2O+H2O	H2O+PQ	SF+H2O	SF+PQ	SF+PQ vs. SF+H2O	SF+PQ vs. H2O+PQ	SF+PQ vs. H2O+H2O	SF+H2O vs. H2O+H2O	H2O+PQ vs. H2O+H2O	Gene name	Description
AT1G03940	5.33767	7.96367	5.198	5.31033	.	.	.	.	.		HXXXD-type acyl-transferase family protein
AT1G05340	8.548	83.3193	6.71533	5.412	.	-3.90689	.	.	3.29718		cysteine-rich TM module stress tolerance protein
AT1G05575	13.281	38.5267	7.70467	9.17833	.	-2.0217	.	.	1.54638		transmembrane protein
AT1G07160	0.344667	5.714	0.312333	0.435333	.	-3.55595	.	.	3.9993		Protein phosphatase 2C family protein
AT1G10040	1.363	8.248	1.36267	1.535	.	-2.42733	.	.	2.5854		alpha/beta-Hydrolases superfamily protein
AT1G10585	4.391	97.5813	3.50167	4.44567	.	-4.55473	.	.	4.48687		basic helix-loop-helix (bHLH) DNA-binding superfamily protein
AT1G13340	2.92667	22.772	2.577	2.76733	.	-3.01469	.	.	2.95947		Regulator of Vps4 activity in the MVB pathway protein
AT1G14040	1.485	2.433	1.51333	1.35867	.	.	.	.	.		EXS (ERD1/XPR1/SYG1) family protein
AT1G14200	21.702	58.5687	15.8717	15.182	.	-1.92193	.	.	1.43961		RING/U-box superfamily protein
AT1G16030	3.13	14.4467	3.50633	3.142	.	-2.16369	.	.	2.21784	Hsp70b	heat shock protein 70B
AT1G17170	2.30233	175.878	1.666	3.88267	.	-5.46718	.	.	6.25906	GSTU24	glutathione S-transferase TAU 24
AT1G17180	0.414333	77.3653	0.0973333	1.19633	.	-5.8937	.	.	7.61911	GSTU25	glutathione S-transferase TAU 25
AT1G18570	9.84933	33.333	8.14133	10.9563	.	-1.56805	.	.	1.7667	MYB51	myb domain protein 51
AT1G19020	36.5683	247.436	26.236	33.4027	.	-2.85636	.	.	2.77059		CDP-diacylglycerol-glycerol-3-phosphate 3-phosphatidyltransferase
AT1G21100	6.391	21.5477	4.05533	4.195	.	-2.30911	.	.	1.75594	IGMT1	O-methyltransferase family protein
AT1G21310	32.879	197.786	33.87	31.9007	.	-2.60841	.	.	2.60181	EXT3	extensin 3
AT1G22400	7.16867	52.3023	5.25233	4.87867	.	-3.39566	.	.	2.87929	UGT85A1	UDP-Glycosyltransferase superfamily protein
AT1G26380	1.68067	68.5093	1.155	2.47733	.	-4.767	.	.	5.35584		FAD-binding Berberine family protein
AT1G26420	0.849333	18.7743	0.821	1.01633	.	-4.19792	.	.	4.43269		FAD-binding Berberine family protein
AT1G27730	61.3933	140.57	24.2603	31.415	.	-2.13373	.	.	1.20601	STZ	salt tolerance zinc finger
AT1G28190	18.8157	51.0373	11.047	13.2953	.	-1.91459	.	.	1.45021		hypothetical protein
AT1G28480	9.622	50.6633	7.74733	6.987	.	-2.8175	.	.	2.40935	GRX480	Thioredoxin superfamily protein
AT1G32170	5.26167	6.57733	1.92833	1.531	.	-2.0325	-1.72576	-1.4364	.	XTH30	xyloglucan endotransglucosylase/hydrolase 30
AT1G35210	5.39467	17.6203	3.29033	4.10233	.	-2.04002	.	.	1.71081		hypothetical protein
AT1G35230	4.433	39.3033	4.879	6.30667	.	-2.60791	.	.	3.16323	AGP5	arabinogalactan protein 5
AT1G36370	46.821	48.579	19.912	18.8677	.	-1.34174	-1.31339	-1.23086	.	SHM7	serine hydroxymethyltransferase 7
AT1G43160	5.69267	35.938	1.52133	1.93267	.	-4.17172	.	.	2.67933	RAP2.6	related to AP2 6
AT1G53540	0.105667	48.0643	0.038	0.786667	.	-5.70776	.	.	8.8219		HSP20-like chaperones superfamily protein
AT1G54050	13.1747	21.0617	12.3467	14.441	.	.	.	.	.		HSP20-like chaperones superfamily protein
AT1G57630	4.06967	76.1317	4.358	4.51233	.	-4.01079	.	.	4.23026		Toll-Interleukin-Resistance (TIR) domain family protein
AT1G59590	8.61567	22.383	5.587	5.72833	.	-1.91656	.	.	1.38387	ZCF37	ZCF37
AT1G61340	15.4723	30.553	9.908	12.4743	.	-1.26348	.	.	.	FBS1	F-box family protein
AT1G61820	1.99933	4.26633	1.266	1.59667	.	.	.	.	.	BGLU46	beta glucosidase 46
AT1G62300	7.278	44.3513	5.21333	5.388	.	-3.013	.	.	2.61873	WRKY6	WRKY family transcription factor
AT1G63720	3.537	13.2147	2.298	2.78067	.	-2.20049	.	.	1.90938		hydroxyproline-rich glycoprotein family protein
AT1G64160	0.0653333	0.349333	0	0.0213333	.	.	.	.	.	DIR5	Disease resistance-responsive (dirigent-like protein) family protein
AT1G66060	3.51767	2.69133	2.98267	2.41733	.	.	.	.	.		hypothetical protein (DUF577)
AT1G69890	52.0047	87.0523	25.3583	23.9463	.	-1.83552	-1.11478	-1.03454	.		actin cross-linking protein (DUF569)
AT1G69920	0.211667	2.473	0.24	0.358667	.	-2.92992	.	.	3.54667	GSTU12	glutathione S-transferase TAU 12
AT1G71000	1.194	25.1477	2.95367	4.99433	.	-2.35874	2.0236	.	4.41846		Chaperone DnaJ-domain superfamily protein
AT1G72520	19.142	37.0827	13.1847	14.4017	.	.	.	.	.	LOX4	PLAT/LH2 domain-containing lipoxygenase family protein
AT1G73010	1.97267	5.47267	1.944	2.56	.	.	.	.	.	PS2	inorganic pyrophosphatase 1
AT1G74310	2.13367	31.465	2.71	3.82733	.	-3.02228	.	.	3.89416	HSP101	heat shock protein 101
AT1G74360	2.58133	17.08	1.92533	1.67833	.	-3.30633	.	.	2.74042		Leucine-rich repeat protein kinase family protein
AT1G74590	3.67667	36.822	4.48967	4.70267	.	-2.93387	.	.	3.32895	GSTU10	glutathione S-transferase TAU 10
AT1G76070	5.10233	21.4823	3.734	4.02733	.	-2.37094	.	.	2.08521		hypothetical protein
AT1G76600	24.9587	125.102	8.861	12.3147	.	-3.30765	-1.00521	-1.48738	2.33622		poly polymerase
AT1G77450	4.653	21.6417	2.942	4.215	.	-2.33381	.	.	2.23294	NAC032	NAC domain containing protein 32
AT1G80820	2.708	9.48467	1.29267	1.45267	.	-2.58914	.	.	.	CCR2	cinnamoyl coa reductase
AT1G80840	46.3987	136.119	18.3907	26.825	.	-2.31588	.	.	1.56471	WRKY40	WRKY DNA-binding protein 40
AT2G02990	5.66867	21.5377	3.758	4.426	.	-2.24968	.	.	1.93675	RNS1	ribonuclease 1
AT2G15480	2.573	46.1597	2.123	3.198	.	-3.79089	.	.	4.13056	UGT73B5	UDP-glucosyl transferase 73B5
AT2G18210	3.672	5.71733	3.474	1.95033	.	.	.	.	.		hypothetical protein
AT2G18690	18.667	135.591	15.8347	16.403	.	-3.03159	.	.	2.81482		transmembrane protein
AT2G20560	1.939	18.3537	2.292	2.613	.	-2.76934	.	.	3.24968		DNAJ heat shock family protein
AT2G21640	19.634	97.2077	16.99	20.0867	.	-2.23875	.	.	2.31735		marker for oxidative stress response protein
AT2G22470	10.815	43.8993	8.367	11.0687	.	-1.95835	.	.	2.03496	AGP2	arabinogalactan protein 2
AT2G22880	14.3737	38.2533	2.17633	3.37433	.	-3.34094	.	.	.		VQ motif-containing protein
AT2G25735	13.647	28.4187	6.76633	7.87467	.	-1.81577	.	.	1.07072		hypothetical protein
AT2G26150	0.521333	23.474	1.07467	2.32267	.	-3.31543	2.13248	.	5.47343	HSFA2	heat shock transcription factor A2
AT2G26530	34.0297	51.763	19.5303	22.1237	.	-1.24607	.	.	.	AR781	AR781, pheromone receptor-like protein (DUF1645)
AT2G28210	6.072	47.5393	5.97267	5.958	.	-2.9625	.	.	3.00861	ACA2	alpha carbonic anhydrase 2
AT2G29460	4.425	138.915	2.23833	4.21967	.	-5.00835	.	.	4.9846	GSTU4	glutathione S-transferase tau 4
AT2G29470	0.417667	69.6217	0.114333	1.037	.	-6.06297	.	.	7.39689	GSTU3	glutathione S-transferase tau 3
AT2G29490	3.58867	66.6457	3.85467	4.82233	.	-3.74526	.	.	4.22915	GSTU1	glutathione S-transferase TAU 1
AT2G29500	4.63267	71.4333	5.12833	6.68	.	-3.3828	.	.	3.95106		HSP20-like chaperones superfamily protein
AT2G30770	2.402	122.025	0.632667	1.94167	.	-5.94873	.	.	5.67115	CYP71A13	cytochrome P450 family 71 polypeptide
AT2G31945	1.62833	9.79067	0.555333	0.375667	.	-4.45726	.	.	2.54775		transmembrane protein
AT2G32030	2.44233	10.2243	1.713	1.73967	.	-2.47819	.	.	2.07463		Acyl-CoA N-acyltransferases (NAT) superfamily protein
AT2G32120	1.32833	2.95433	1.29767	1.559	.	.	.	.	1.16549	HSP70T-2	heat-shock protein 70T-2
AT2G33710	0.397333	7.60667	0.348667	0.211333	.	-5.66368	.	.	4.28279		Integrase-type DNA-binding superfamily protein
AT2G37430	0.887	8.72667	0.683	1.09433	.	-2.93276	.	.	3.29247	ZAT11	C2H2 and C2HC zinc fingers superfamily protein
AT2G38250	1.55833	21.2713	1.00767	1.284	.	-3.97586	.	.	3.78138		Homeodomain-like superfamily protein
AT2G38340	0.274333	16.0087	0.076	0.209	.	-5.96537	.	.	5.84969	DREB19	Integrase-type DNA-binding superfamily protein
AT2G38470	48.7537	142.399	26.8427	36.513	.	-1.93721	.	.	1.5582	WRKY33	WRKY DNA-binding protein 33
AT2G40000	134.039	304.196	37.6373	37.7057	.	-2.98645	-1.82648	-1.83345	1.19448	HSPRO2	ortholog of sugar beet HS1 PRO-1 2
AT2G41380	2.11167	22.705	1.69267	1.91533	.	-3.50924	.	.	3.42722		S-adenosyl-L-methionine-dependent methyltransferases superfamily protein
AT2G41640	5.48	12.8903	2.79733	3.22533	.	-1.95646	.	.	1.23946		Glycosyltransferase family 61 protein
AT2G43000	0.690667	12.924	0.683667	0.729	.	-4.0159	.	.	4.12409	NAC042	NAC domain containing protein 42
AT2G43510	64.2373	214.787	40.0423	47.1117	.	-2.163	.	.	1.7526	TI1	trypsin inhibitor protein 1
AT2G43820	15.8597	117.321	7.53133	9.158	.	-3.65858	.	-1.07171	2.90109	UGT74F2	UDP-glucosyltransferase 74F2
AT2G44460	0.292667	0.828667	0.0973333	0.363	.	.	.	.	1.81439	BGLU28	beta glucosidase 28
AT2G46240	4.82533	9.255	5.71733	5.041	.	.	.	.	.	BAG6	BCL-2-associated athanogene 6
AT2G47000	2.14233	42.73	2.032	2.979	.	-3.81622	.	.	4.30948	ABCB4	ATP binding cassette subfamily B4
AT3G02550	15.557	28.7733	12.7233	13.4943	.	-1.07078	.	.	.	LBD41	LOB domain-containing protein 41
AT3G02800	2.12867	12.875	1.19467	1.18133	.	-3.33463	.	.	2.60146	PFA-DSP3	Tyrosine phosphatase family protein
AT3G02840	5	12.2307	1.661	2.16867	.	-2.43156	.	.	1.28973		ARM repeat superfamily protein
AT3G04070	6.03933	12.7083	2.692	2.50967	.	-2.45611	-1.317	.	.	NAC047	NAC domain containing protein 47
AT3G08720	6.39967	18.4733	5.63333	6.65967	.	-1.41707	.	.	1.50835	S6K2	serine/threonine protein kinase 2
AT3G09270	1.13	35.4303	0.804667	1.516	.	-4.48791	.	.	4.94793	GSTU8	glutathione S-transferase TAU 8
AT3G09350	7.69633	92.706	9.20933	10.4907	.	-3.11595	.	.	3.60049	Fes1A	Fes1A
AT3G09410	21.537	17.0963	24.7413	23.527	.	.	.	.	.		Pectinacetylesterase family protein
AT3G10020	514.878	504.472	197.891	158.713	.	-1.62582	-1.65167	-1.34351	.		plant/protein
AT3G10320	0.915667	5.04033	0.366333	0.347	.	-3.73684	.	.	2.45138		Glycosyltransferase family 61 protein
AT3G10930	12.3997	31.589	3.03533	3.49167	.	-3.10745	-1.7966	.	1.3555		hypothetical protein
AT3G11340	0.224667	14.873	0.156	0.173667	.	-6.18467	.	.	5.96637	UGT76B1	UDP-Glycosyltransferase superfamily protein
AT3G11840	4.206	17.1443	4.37833	6.66533	.	-1.32782	.	.	2.02834	PUB24	E3 ubiquitin-protein ligase PUB24-like protein
AT3G12580	1.79867	141.428	2.88733	5.396	.	-4.68264	1.59002	.	6.30467	HSP70	heat shock protein 70
AT3G13610	0.138	10.532	0.162667	0.313	.	-5.22096	.	.	6.10865		2-oxoglutarate (2OG) and Fe(II)-dependent oxygenase superfamily protein
AT3G13790	12.7403	42.2317	7.785	9.014	.	-2.20362	.	.	1.74513	ATBFRUCT1	Glycosyl hydrolases family 32 protein
AT3G15500	4.94467	29.8737	1.34867	1.072	.	-4.70834	-2.15253	-1.85516	2.60587	NAC3	NAC domain containing protein 3
AT3G15950	8.56133	10.06	7.575	7.67767	.	.	.	.	.	NAI2	DNA topoisomerase-like protein
AT3G16530	62.5807	771.768	79.7777	93.3787	.	-3.02067	.	.	3.63469		Legume lectin family protein
AT3G17690	0.442667	1.13133	0.367333	0.456667	.	.	.	.	.	CNGC19	cyclic nucleotide gated channel 19
AT3G23230	1.48033	10.5287	1.51133	2.25733	.	-2.134	.	.	2.83502	TDR1	Integrase-type DNA-binding superfamily protein
AT3G24500	7.846	34.278	9.63333	11.2513	.	-1.54725	.	.	2.06045	MBF1C	multiprotein bridging factor 1C
AT3G25250	0.585667	18.45	0.352333	0.87	.	-4.31462	.	.	4.98345	AGC2-1	AGC (cAMP-dependent, cGMP-dependent and protein kinase C) kinase family protein
AT3G26440	2.35367	9.434	2.949	3.19267	.	.	.	.	1.06121		transmembrane protein, putative (DUF707)
AT3G26830	7.02867	277.537	4.87767	6.543	.	-5.38024	.	.	5.31781	PAD3	Cytochrome P450 superfamily protein
AT3G28210	2.22233	128.869	1.03633	3.675	.	-5.10878	.	.	5.88264	PMZ	zinc finger (AN1-like) family protein
AT3G28580	1.99233	13.35	1.86333	2.052	.	-2.65212	.	.	2.74215		P-loop containing nucleoside triphosphate hydrolases superfamily protein
AT3G28740	1.97567	25.04	1.22033	1.022	.	-4.53931	.	.	3.66697	CYP81D11	Cytochrome P450 superfamily protein
AT3G46080	3.04967	95.4957	0.598333	2.58333	.	-5.19087	.	.	4.97107		C2H2-type zinc finger family protein
AT3G46230	0.12	79.363	0.343667	1.928	.	-5.25462	.	.	8.92881	HSP17.4	heat shock protein 17.4
AT3G48450	1.46767	3.09367	0.577333	0.759667	.	.	.	.	.		RPM1-interacting protein 4 (RIN4) family protein
AT3G48850	0.424333	27.357	0.336667	0.495667	.	-5.65109	.	.	6.00111	PHT3;2	phosphate transporter 3;2
AT3G49580	28.0167	62.9953	18.6057	15.91	.	-2.11096	.	.	1.18065	LSU1	response to low sulfur 1
AT3G49620	21.405	392.59	12.897	11.8817	.	-5.01885	.	.	4.2105	DIN11	2-oxoglutarate (2OG) and Fe(II)-dependent oxygenase superfamily protein
AT3G53150	0.0553333	2.831	0.0833333	0.0636667	.	-5.12977	.	.	5.56639	UGT73D1	UDP-glucosyl transferase 73D1
AT3G53230	3.49333	41.1973	3.36867	3.51933	.	-3.52403	.	.	3.57318	AtCDC48B	ATPase, AAA-type, CDC48 protein
AT3G53790	0	0	0.045	0.0143333	.	.	.	.	.	TRFL4	TRF-like 4
AT3G54150	1.98733	26.288	1.81567	2.099	.	-3.44394	.	.	3.71339		S-adenosyl-L-methionine-dependent methyltransferases superfamily protein
AT3G55980	93.8573	121.611	38.1767	51.3153	.	.	.	.	.	SZF1	salt-inducible zinc finger 1
AT3G60120	0.176	2.266	0.0243333	0.0533333	.	-5.21551	.	.	3.69455	BGLU27	beta glucosidase 27
AT4G11280	33.8767	75.869	17.5607	19.595	.	-1.92356	.	.	1.17432	ACS6	1-aminocyclopropane-1-carboxylic acid (acc) synthase 6
AT4G12400	0.619333	19.552	0.412333	1.09467	.	-4.0691	.	.	4.95772	Hop3	stress-inducible protein
AT4G15975	1.152	3.81633	1.06433	1.67233	.	.	.	.	1.74844		RING/U-box superfamily protein
AT4G17490	19.232	30.4673	8.345	12.662	.	-1.23077	.	.	.	ERF6	ethylene responsive element binding factor 6
AT4G18880	16.4847	46.93	12.968	15.352	.	-1.58256	.	.	1.51774	HSF A4A	heat shock transcription factor A4A
AT4G21390	2.12967	17.0957	1.52967	1.927	.	-3.09078	.	.	3.01983	B120	S-locus lectin protein kinase family protein
AT4G21990	56.139	172.586	64.649	67.5113	.	-1.33088	.	.	1.6323	APR3	APS reductase 3
AT4G22530	6.84567	27.867	6.707	7.59867	.	-1.75128	.	.	1.93925		S-adenosyl-L-methionine-dependent methyltransferases superfamily protein
AT4G24160	17.4583	50.0623	16.5583	18.4933	.	-1.40744	.	.	1.52661		alpha/beta-Hydrolases superfamily protein
AT4G24380	42.7523	67.5477	26.007	28.2137	.	.	.	.	.		dihydrofolate reductase
AT4G24570	70.8303	90.4707	24.692	34.6317	.	.	.	.	.	DIC2	dicarboxylate carrier 2
AT4G25200	0.026	7.09167	0.052	0.205	.	-4.98683	.	.	7.53125	HSP23.6-MITO	mitochondrion-localized small heat shock protein 23.6
AT4G34410	21.5773	19.6787	11.56	13.997	.	.	.	.	.	RRTF1	redox responsive transcription factor 1
AT4G37370	7.49033	136.947	4.93533	6.80867	.	-4.3043	.	.	4.20609	CYP81D8	cytochrome P450, family 81, subfamily D, polypeptide 8
AT4G37990	12.1617	144.906	6.45433	5.76733	.	-4.62635	.	.	3.59051	ELI3-2	cinnamyl alcohol dehydrogenase 8
AT4G39670	3.43067	50.8687	2.07767	2.82033	.	-4.14077	.	.	3.888		Glycolipid transfer protein (GLTP) family protein
AT5G04340	22.2957	87.0647	13.6263	15.263	.	-2.478	.	.	1.9749	ZAT6	6
AT5G05410	20.4693	59.6293	10.3973	10.9633	.	-2.43236	.	-1.02671	1.55252	DREB2A	DRE-binding protein 2A
AT5G05730	41.9723	139.506	29.7583	32.748	.	-2.06468	.	.	1.74497	ASA1	anthranilate synthase alpha subunit 1
AT5G12020	0.306333	41.65	0.098	1.13667	.	-5.03198	.	.	7.06997	HSP17.6II	17.6 kDa class II heat shock protein
AT5G12030	0.056	93.9097	0.325667	2.69167	2.95031	-5.07414	5.31684	.	10.4188	HSP17.6A	heat shock protein 17.6A
AT5G13080	2.954	85.3657	1.32167	1.30367	.	-5.95991	.	.	4.84679	WRKY75	WRKY DNA-binding protein 75
AT5G14700	13.466	19.3207	13.425	12.0817	.	.	.	.	.		NAD(P)-binding Rossmann-fold superfamily protein
AT5G14730	1.63267	10.707	0.748667	1.23767	.	-3.11472	.	.	2.72553		hypothetical protein
AT5G14760	1.59567	4.19967	2.11133	1.937	.	-1.09264	.	.	1.40396	AO	L-aspartate oxidase
AT5G20230	109.584	707.906	48.8823	60.2667	.	-3.53117	.	.	2.70653	BCB	blue-copper-binding protein
AT5G22530	0.618333	5.26533	0.891333	0.595333	.	-3.19914	.	.	3.08179		hypothetical protein
AT5G24110	0.912333	8.09967	1.277	0.788	.	-3.27111	.	.	3.17372	WRKY30	WRKY DNA-binding protein 30
AT5G25450	0.649667	4.31267	0.701333	0.449333	.	-3.20274	.	.	2.91186		Cytochrome bd ubiquinol oxidase, 14kDa subunit
AT5G26220	18.651	12.8337	18.2507	16.5287	.	.	.	.	.		ChaC-like family protein
AT5G27420	18.7157	100.566	10.571	14.552	.	-2.75837	.	.	2.43716	CNI1	carbon/nitrogen insensitive 1
AT5G28630	4.80567	6.55933	4.64767	4.74467	.	.	.	.	.		glycine-rich protein
AT5G35320	7.986	22.561	9.214	9.818	.	-1.17088	.	.	1.49998		DBH-like monooxygenase
AT5G37670	4.639	6.81	4.85533	4.895	.	.	.	.	.		HSP20-like chaperones superfamily protein
AT5G38900	4.005	74.627	3.53	3.68733	.	-4.27526	.	.	4.22304		Thioredoxin superfamily protein
AT5G42380	4.71567	40.767	1.97633	3.11633	.	-3.65937	.	.	3.12661	CML37	calmodulin like 37
AT5G46080	4.075	15.034	3.73767	3.93933	.	-1.89281	.	.	1.88129		Protein kinase superfamily protein
AT5G47230	12.612	20.1533	6.41867	9.37133	.	-1.06265	.	.	.	ERF5	ethylene responsive element binding factor 5
AT5G48570	3.73467	11.22	3.91233	4.739	.	-1.21895	.	.	1.59397		FKBP-type peptidyl-prolyl cis-trans isomerase family protein
AT5G48850	14.5057	6.05333	4.31333	3.09333	.	.	-2.1977	-1.72392	-1.22634	ATSDI1	Tetratricopeptide repeat (TPR)-like superfamily protein
AT5G51060	0.167	5.20333	0.073	0.138	.	-5.08836	.	.	4.95888	RHD2	NADPH/respiratory burst oxidase protein D
AT5G51190	3.32033	9.829	0	0	.	-10.1448	.	.	.		Integrase-type DNA-binding superfamily protein
AT5G51440	0.0813333	61.059	0.340667	1.98133	2.61034	-4.87751	4.45114	.	9.36426		HSP20-like chaperones superfamily protein
AT5G52640	10.2503	116.235	8.62233	9.509	.	-3.5825	.	.	3.51219	HSP90.1	heat shock-like protein
AT5G52760	11.3363	53.587	14.3923	18.422	.	-1.5092	.	.	2.25061		Copper transport protein family
AT5G54490	8.23567	27.1797	4.55467	6.56367	.	-2.00067	.	.	1.73579	PBP1	pinoid-binding protein 1
AT5G57220	4.469	25.742	4.52633	4.24667	.	-2.5527	.	.	2.53312	CYP81F2	cytochrome P450, family 81, subfamily F, polypeptide 2
AT5G59820	27.0123	177.42	8.03067	10.9787	.	-3.97546	-1.28062	-1.73792	2.72888	RHL41	C2H2-type zinc finger family protein
AT5G63790	39.834	185.076	34.4557	43.3643	.	-2.06653	.	.	2.22722	NAC102	NAC domain containing protein 102
AT5G64310	41.7263	88.6877	38.2583	42.0867	.	-1.04703	.	.	1.09882	AGP1	arabinogalactan protein 1
AT5G64510	0.911333	6.73233	0.843333	1.44567	.	-2.21532	.	.	2.89535	TIN1	tunicamycin induced protein
AT5G64905	0.751	13.737	0.37	0.851	.	-3.93534	.	.	4.14783	PROPEP3	elicitor peptide 3 precursor
AT5G65600	0.717333	4.282	0.661333	0.569	.	-2.83964	.	.	2.5603		Concanavalin A-like lectin protein kinase family protein
