# Supplementary material for: A Biostimulant Obtained from the Seaweed Ascophyllum nodosum Protects Arabidopsis thaliana from Severe Oxidative Stress
Source: Int J Mol Sci. 2020 Jan 11;21(2):474. doi: 10.3390/ijms21020474 (PMC7013732; doi:10.3390/ijms21020474)
Supplement: Supplementary file 1 [file ijms-21-00474-s001.zip › Data.S5.xlsx]

## Sheet: Primary metab. norm. data
Metabolite name	(H2O+H2O)-1	(H2O+H2O)-4	(H2O+H2O)-5	(H2O+H2O)-6	(H2O+H2O)-7	(H2O+PQ)-1	(H2O+PQ)-2	(H2O+PQ)-3	(H2O+PQ)-5	(H2O+PQ)-6	(H2O+PQ)-7	(SF+H2O)-2	(SF+H2O)-3	(SF+H2O)-4	(SF+H2O)-5	(SF+H2O)-6	(SF+H2O)-7	(SF+PQ)-2	(SF+PQ)-4	(SF+PQ)-5	(SF+PQ)-6	(SF+PQ)-7
Alanine	16.5232	16.6009	16.6749	16.7312	16.7763	17.5115	17.4381	17.5738	17.4568	17.3763	17.3733	16.7874	17.0642	17.2049	17.076	16.8075	16.758	16.7731	17.0491	16.8639	16.7289	16.97
Asparagine	11.1389	10.8742	10.817	11.098	11.0182	12.0296	11.849	11.9929	12.0951	11.1267	11.2761	10.242	10.5147	10.633	10.1624	9.783	9.84549	9.93221	10.032	9.81057	9.92184	9.87344
beta-Alanine	10.1124	9.96867	10.3998	10.6239	10.4767	11.8122	11.6751	11.3382	11.5517	10.9054	10.8556	9.96578	10.2009	10.4979	10.1293	10.0634	10.1911	9.98014	10.0182	9.95128	9.82814	9.91139
Benzoic acid	11.2414	11.6138	11.9289	12.0369	11.9982	12.1296	12.0081	12.0317	12.1124	12.0481	11.9578	12.1202	12.4896	12.3796	12.2438	12.1774	12.3029	12.4221	12.1655	12.0848	12.2088	12.1709
4-hydroxy-benzoic acid	11.4157	11.5058	12.7013	12.4548	12.3644	12.0858	11.8811	11.994	11.9244	11.7078	11.5459	11.3515	11.6662	11.4184	11.3095	11.1699	11.0471	10.8948	11.0471	10.9352	10.6689	10.4305
GABA	11.5788	11.3939	11.6662	11.6662	11.8918	16.2358	15.9351	14.9415	15.0457	14.0762	14.0445	11.6101	11.1768	11.2354	11.5033	11.3298	11.2715	11.6357	11.5821	12.2189	11.8049	11.6325
Citric acid	10.6266	11.9812	10.6519	10.4388	11.2814	10.5793	11.0593	12.0283	10.8258	10.6138	10.8994	11.0182	12.4674	11.128	10.7574	10.7863	11.6303	10.8811	11.8114	11.9546	12.6119	11.7039
Cysteine	10.8033	10.6248	11.1997	11.5294	11.3537	12.5649	12.5046	12.1696	12.477	12.1904	12.1488	11.4574	11.6036	11.865	11.5294	11.3287	11.5755	11.611	11.5665	11.4833	11.6036	11.5479
Dehydroascorbic acid dimer	13.3093	14.052	14.2135	13.3894	13.3109	13.5971	13.4756	12.0911	12.3737	14.7435	13.9959	12.6043	14.4531	15.2502	12.9453	13.268	13.9615	13.6902	13.2078	13.5348	13.9657	11.5755
Erythritol	8.32643	8.11894	8.33539	8.83605	8.47168	9.52356	9.50779	9.19229	9.33092	9.10591	9.01681	8.76155	8.71768	9.02237	8.73471	8.42626	8.71081	8.79766	8.67243	8.44708	8.5157	8.50779
Fructose	13.7408	13.0086	13.7986	14.4198	14.0657	14.9897	14.7265	14.414	14.5265	13.6956	13.7885	14.3908	14.0668	14.1575	13.9338	13.3979	13.62	13.8367	14.2646	14.1082	14.0607	14.0967
Fumaric acid	17.1722	16.8171	17.064	16.09	16.7196	16.3635	16.5364	16.6231	16.811	16.993	17.0984	17.7399	17.4891	17.8117	17.5583	17.3886	17.5963	17.6242	17.4695	17.5865	17.6328	17.4213
Galactinol	11.1026	10.6119	12.0961	12.1354	11.0175	11.8963	11.8865	11.69	11.9484	11.8619	11.7912	11.7674	11.809	12.1504	11.577	11.762	12.0444	11.4009	11.056	11.3712	11.6321	11.6421
Glucoheptose (similar to)	9.3015	8.99152	9.32193	9.3015	8.18488	13.4274	13.1607	11.8742	11.9654	11.5314	11.3907	8.89178	9.42626	9.9629	9.18239	9.10066	9.31288	9.19229	9.04166	9.32643	9.1472	8.90689
Glucose	13.2893	12.2814	13.1951	13.458	13.4708	13.265	12.7887	12.9862	13.2697	12.6466	12.9084	13.5381	13.0713	13.4051	13.1929	12.5618	12.8694	13.0441	13.1788	13.1227	13.2515	13.0684
Glutamic acid	14.7623	14.5419	14.5806	14.6748	14.5979	14.3729	14.432	14.842	14.9012	14.3582	14.412	14.6077	14.637	14.8254	14.4896	14.1472	14.3098	14.0361	14.2059	13.9616	14.1661	14.2573
Glutamine	10.8734	10.6865	10.1472	10.1098	9.92035	9.06609	9.56796	10.1662	9.96867	9.96145	9.95274	9.61102	10.2131	10.3498	10.0265	9.58684	9.93074	10.2228	10.0566	10.0593	10.3095	10.2866
Glyceric acid	11.7022	11.4476	11.9341	12.163	11.8305	10.2131	10.1687	10.6493	10.8796	10.6926	10.6466	12.5238	12.2515	12.6687	12.4528	11.9385	12.1727	11.8761	11.8198	11.5013	11.584	11.7964
Glycerol	13.6588	13.692	13.7479	13.6231	14.0841	14.2808	13.92	13.9751	14.3093	13.4011	13.5613	13.9646	13.9377	13.7751	13.9724	13.8697	13.6103	13.9974	13.8803	13.8627	13.8762	13.7554
Glycine	13.588	13.927	14.0721	14.0829	15.4076	14.7623	14.8203	15.1987	15.8083	15.5167	15.4202	14.6719	14.6111	14.8446	14.6382	14.4	14.3163	15.5242	16.0369	15.3908	15.5222	15.3619
Isoleucine	11.6036	11.4828	11.9661	12.0845	11.9076	13.4675	13.2152	12.6499	12.9112	12.3677	12.3018	11.5689	11.6662	11.9633	11.6595	11.7039	11.8392	11.6211	11.4579	11.5103	11.4988	11.4383
Lactic acid	12.5591	13.2999	13.2639	12.895	12.6771	12.744	12.3219	13.2742	13.2682	13.0995	13.3153	13.0295	13.4029	13.0577	13.3555	13.0969	12.8971	12.95	13.7678	13.4248	13.1494	12.4331
Lysine	9.91439	9.73978	9.97441	10.3608	10.0888	11.7351	11.4589	10.7928	11.0841	10.2866	10.2958	9.77643	9.82972	10.1059	9.79442	9.62936	9.81698	9.46352	9.62205	9.61839	9.56415	9.56415
Malic acid	12.463	12.4252	12.4617	12.4499	12.7275	11.4737	11.8118	12.5442	12.4388	12.4359	12.5491	12.9878	12.9385	13.0532	12.7694	12.6414	12.838	12.884	12.8682	12.8849	13.0334	12.8836
Maltose	9.83763	9.19476	10.1163	10.3026	10.5594	9.79279	9.73978	9.93811	10.3454	10.137	10.4157	11.0775	10.5971	11.1805	10.9593	10.5372	10.8057	10.7887	10.5392	10.3343	10.6821	10.6357
myo-Inositol	14.9132	14.6332	14.9868	15.1176	14.7162	14.5956	14.6958	14.8251	14.8424	14.7673	14.703	15.1475	15.1058	15.4666	15.0743	14.8708	15.1524	15.1093	14.9361	14.8697	15.0655	14.9346
Nicotinic acid	9.88264	9.67596	9.69349	9.79279	9.65284	9.94837	9.80252	9.79928	10.0098	9.71939	9.65464	9.32643	9.76321	9.77149	9.47776	9.39874	9.3966	9.16239	9.19967	9.26444	9.11894	9.01959
Ornithine	10.5565	10.2046	9.89026	10.0768	9.96145	10.6175	10.5353	10.8517	10.9816	10.3354	10.3641	9.55651	9.73471	9.97298	9.58496	9.3015	9.39874	9.49785	9.92926	9.64566	9.82337	9.50978
Phenylalanine	10.3332	10.1189	10.6239	10.764	10.4605	11.0021	10.7903	10.1472	10.4778	9.80896	9.77149	10.3354	10.4707	10.7432	10.4147	10.3387	10.5216	10.1997	10.0861	10.098	10.1586	10.1202
Proline	17.0067	16.9627	17.5448	17.5988	17.5542	16.7642	16.816	16.9053	16.9021	17.0926	17.0326	17.2299	17.4408	17.2373	17.1569	17.056	17.2138	17.0811	16.6917	16.8449	16.9187	16.7921
Putrescine	13.6327	13.2375	13.5567	13.9305	13.8611	13.9205	13.6582	13.5345	13.985	13.4202	13.3298	12.8574	13.1755	13.3242	12.7153	12.7339	12.9513	12.7855	12.7002	12.3998	12.5558	12.5934
Pyroglutamic acid	16.8176	16.5125	16.2227	16.2896	16.3137	16.3065	16.2209	16.4683	16.6769	16.2573	16.2233	16.0122	16.4949	16.318	16.1241	15.9875	15.9258	16.054	16.2006	16.0671	16.1013	15.8223
Pyruvic acid	10.2479	9.98726	10.544	10.3652	10.0782	10.1799	10.3608	9.86264	9.99435	10.4522	10.403	10.1812	10.5546	10.9636	10.4263	10.0993	10.4357	10.4284	10.4481	10.1059	10.1254	9.75989
Raffinose	9.46148	9.06609	10.0715	10.2276	9.43254	9.70217	9.8857	9.64746	9.92481	10.1046	10.0471	10.6944	9.99859	10.9758	10.3231	10.1787	10.9513	10.2633	9.60918	9.60548	10.4367	10.4778
Rhamnose	10.1997	9.83447	10.0154	10.813	10.1923	10.2046	10.102	10.3554	10.6036	10.0042	10.0553	10.1472	9.78463	10.1972	9.73132	9.42417	9.78136	9.69349	9.7039	9.42626	9.35315	9.70217
Serine	15.6219	16.1512	16.2371	16.3965	16.2741	16.6678	16.7888	16.5775	16.7218	16.5196	16.4591	16.5008	16.7014	16.6605	16.3349	16.1693	16.5152	16.268	16.0421	15.9892	16.2785	16.1543
Spermidine	9.77479	9.3015	10.0661	10.7838	10.1712	9.86882	9.99859	9.97441	10.2491	9.92184	10.2033	9.97154	10.1935	10.8556	10.2264	9.66	9.85487	10.0307	9.93517	9.57554	10.0168	10.0389
Succinic acid	11.4383	11.8297	12.2082	12.1364	11.8657	12.2703	12.1154	12.3343	12.4244	12.0634	12.0755	12.0255	12.0168	12.1421	11.8933	11.8265	11.9012	11.8049	11.8146	11.7095	11.6821	11.6393
Sucrose	14.7319	15.8343	16.385	16.4104	16.121	16.8864	16.4901	16.3168	16.7	16.804	16.7172	16.6117	17.0514	17.4777	16.9507	16.7032	16.5483	16.6421	17.0015	16.9147	16.5883	16.5266
Threonic acid	12.0272	11.6804	11.8102	12.0199	12.0546	13.2035	13.0916	12.9533	12.9537	12.4001	12.543	11.8784	11.749	11.8944	11.9465	11.8914	11.96	11.7574	11.6595	11.6362	11.6874	11.9252
Threonine	15.355	15.2241	15.1817	15.2268	15.1804	15.412	15.6017	15.3568	15.4308	15.3154	15.2525	15.1671	15.5239	15.3407	15.0711	14.9703	15.238	15.209	14.9791	14.9214	15.1469	14.9554
Trehalose	9.57932	9.15987	9.89633	10.0861	9.4818	9.41996	9.23601	9.36851	9.81858	9.64386	9.60548	9.99152	10.4898	10.2889	9.81218	9.65642	9.93369	9.71425	9.69523	9.52552	9.4818	9.50383
Uracil	9.36851	9.98868	9.86573	9.62205	9.87191	12.3219	11.9873	11.3636	11.4252	10.6257	10.4778	9.53916	9.86419	9.60548	9.61102	9.62936	9.41363	9.18239	9.42836	9.60177	9.07146	8.95128
Urea	9.55267	10.224	9.78627	10.0661	9.84549	10.2046	10.0661	10.3576	10.6064	10.0993	10.0348	9.37287	9.64024	9.31515	9.17991	9.09276	9.15735	9.1267	10.1472	9.88874	9.31967	9.47371
Valine	13.907	13.7274	14.1524	14.3032	14.0947	15.3468	15.2005	14.8094	14.9811	14.6963	14.6577	13.8006	14.015	14.1644	13.8455	13.825	13.9152	13.835	13.6735	13.7162	13.7026	13.6241

## Sheet: metabolite heatmap data
Metabolite name	(H2O+PQ)-(H2O+H2O) (Log2 fold change)	(SF+H2O)-(H2O+H2O) (Log2 fold change)	(SF+PQ)-(H2O+H2O) (Log2 fold change)
GABA	3.40707	-0.284917	0.13544
Glucoheptose (similar to)	3.20471	0.29255	0.102632
Glycine	1.03889	0.364825	1.35167
Citric acid	0.00498405	0.301927	0.796595
Dehydroascorbic acid dimer	-0.275537	0.092058	-0.460207
Benzoic acid	0.284134	0.521767	0.446591
Malic acid	-0.296559	0.365914	0.405359
Fumaric acid	-0.034986	0.824743	0.774288
Maltose	0.0593208	0.857414	0.593848
Raffinose	0.233473	0.868462	0.426642
Sucrose	0.755909	0.994033	0.83812
Glyceric acid	-1.27384	0.519181	-0.0999294
Proline	-0.414629	-0.111001	-0.467742
Benzoic acid (4-hydroxy)	-0.231903	-0.761313	-1.29313
Putrescine	-0.00229822	-0.684092	-1.03676
Glycerol	0.146804	0.0938203	0.113283
Lactic acid	0.064871	0.200912	0.206022
Galactinol	0.452991	0.458964	0.0277364
Serine	0.486287	0.344182	0.0102705
Nicotinic acid	0.082792	-0.217171	-0.586537
Rhamnose	0.00987171	-0.366649	-0.635171
myo-Inositol	-0.135227	0.262818	0.109624
Pyruvic acid	-0.0356806	0.198926	-0.0709766
Glucose	-0.16147	-0.0324744	-0.0058115
Glutamine	-0.566956	-0.394456	-0.160504
Pyroglutamic acid	-0.0723585	-0.287472	-0.382128
Spermidine	0.0165485	0.107526	-0.100053
Glutamic acid	-0.0784387	-0.128689	-0.506091
Phenylalanine	-0.127116	0.0106086	-0.327558
Trehalose	-0.125291	0.388064	-0.0565671
Ornithine	0.476343	-0.546355	-0.456739
Urea	0.333223	-0.601858	-0.303698
Succinic acid	0.939068	-0.0318155	-0.185323
Uracil	1.62353	-0.132904	-0.496322
Cysteine	1.24036	0.457751	0.460286
Erythritol	0.86185	0.311199	0.170436
Alanine	0.793656	0.288366	0.215678
Fructose	0.550117	0.121129	0.266699
Asparagine	0.738979	-0.792506	-1.07524
beta-Alanine	1.04005	-0.141597	-0.378479
Isoleucine	1.00995	-0.075432	-0.303655
Lysine	0.926576	-0.190173	-0.449191
Threonic acid	0.939068	-0.0318155	-0.185323
Valine	0.911702	-0.109319	-0.326643
Threonine	0.161255	-0.0150685	-0.191246

## Sheet: metabolites and statistics
Metabolite name	(H2O+PQ)-(H2O+H2O) (Log2 fold change)	(H2O+PQ)-(H2O+H2O) (P.value)	(H2O+PQ)-(H2O+H2O) (adjusted p.value)		(SF+H2O)-(H2O+H2O) (Log2 fold change)	(SF+H2O)-(H2O+H2O) (p.value)	(SF+H2O)-(H2O+H2O) (adjusted p.value)		(SF+PQ)-(H2O+H2O) (Log2 fold change)	(SF+PQ)-(H2O+H2O) (p.value)	(SF+PQ)-(H2O+H2O) (adjusted p.value)
Alanine	0.793656	6.09819e-08	5.48837e-07		0.288366	0.0088541	0.0306488		0.215678	0.0520206	0.111473
Asparagine	0.738979	0.000315933	0.0010155		-0.792506	0.000147541	0.00192642		-1.07524	5.32905e-06	7.99358e-05
beta-Alanine	1.04005	1.32614e-06	5.96765e-06		-0.141597	0.385424	0.525578		-0.378479	0.0333915	0.0794436
Benzoic acid	0.284134	0.0303388	0.0620567		0.521767	0.000315833	0.00236875		0.446591	0.00207293	0.00848016
4-hydroxy-benzoic acid	-0.231903	0.246397	0.395995		-0.761313	0.000724384	0.00407466		-1.29313	1.87222e-06	4.2125e-05
GABA	3.40707	2.79781e-11	1.25901e-09		-0.284917	0.327426	0.52551		0.13544	0.653047	0.753515
Citric acid	0.00498405	0.988331	0.988331		0.301927	0.379778	0.525578		0.796595	0.0335428	0.0794436
Cysteine	1.24036	9.43245e-09	1.41487e-07		0.457751	0.00365856	0.0137196		0.460286	0.00487387	0.018277
Dehydroascorbic acid dimer	-0.275537	0.576347	0.704781		0.092058	0.85146	0.905363		-0.460207	0.37418	0.495238
Erythritol	0.86185	1.1945e-06	5.96765e-06		0.311199	0.0270551	0.0716165		0.170436	0.227878	0.341818
Fructose	0.550117	0.029691	0.0620567		0.121129	0.614369	0.708887		0.266699	0.292819	0.425059
Fumaric acid	-0.034986	0.828491	0.909319		0.824743	3.22112e-05	0.0014495		0.774288	0.000116783	0.00087587
Galactinol	0.452991	0.0401539	0.078562		0.458964	0.0378222	0.0810475		0.0277364	0.899576	0.941417
Glucoheptose (similar to)	3.20471	3.27943e-10	7.37871e-09		0.29255	0.346109	0.52551		0.102632	0.749522	0.803059
Glucose	-0.16147	0.407444	0.59145		-0.0324744	0.866706	0.905363		-0.0058115	0.97705	0.97705
Glutamic acid	-0.0784387	0.544387	0.699927		-0.128689	0.32328	0.52551		-0.506091	0.000936605	0.00602103
Glutamine	-0.566956	0.00765442	0.0181289		-0.394456	0.0535663	0.104804		-0.160504	0.435837	0.560362
Glyceric acid	-1.27384	2.48856e-08	2.79963e-07		0.519181	0.00258145	0.0105605		-0.0999294	0.538924	0.655448
Glycerol	0.146804	0.313807	0.470711		0.0938203	0.516944	0.664642		0.113283	0.454453	0.568067
Glycine	1.03889	0.000254649	0.000881479		0.364825	0.142275	0.266766		1.35167	1.85306e-05	0.000166775
Isoleucine	1.00995	4.68147e-06	1.91515e-05		-0.075432	0.660226	0.742754		-0.303655	0.0996438	0.166073
Lactic acid	0.064871	0.760967	0.878039		0.200912	0.35034	0.52551		0.206022	0.359019	0.489571
Lysine	0.926576	0.000111349	0.000417558		-0.190173	0.348641	0.52551		-0.449191	0.0412225	0.0927505
Malic acid	-0.296559	0.0726387	0.13075		0.365914	0.0295193	0.0737982		0.405359	0.0217708	0.0612303
Maltose	0.0593208	0.758952	0.878039		0.857414	0.000171238	0.00192642		0.593848	0.00681175	0.0230822
myo-Inositol	-0.135227	0.226258	0.377096		0.262818	0.0240829	0.0677332		0.109624	0.344518	0.484479
Nicotinic acid	0.082792	0.431135	0.602029		-0.217171	0.0468153	0.0957586		-0.586537	1.66425e-05	0.000166775
Ornithine	0.476343	0.00385709	0.00964273		-0.546355	0.00122921	0.00614604		-0.456739	0.00718113	0.0230822
Phenylalanine	-0.127116	0.485223	0.642208		0.0106086	0.9533	0.9533		-0.327558	0.0935446	0.163414
Proline	-0.414629	0.00294597	0.00817775		-0.111001	0.381944	0.525578		-0.467742	0.00154498	0.00772488
Putrescine	-0.00229822	0.987724	0.988331		-0.684092	0.000120564	0.00192642		-1.03676	8.01317e-07	3.60592e-05
Pyroglutamic acid	-0.0723585	0.579487	0.704781		-0.287472	0.0356702	0.0802579		-0.382128	0.00929577	0.0278873
Pyruvic acid	-0.0356806	0.825377	0.909319		0.198926	0.226061	0.40691		-0.0709766	0.674774	0.75912
Raffinose	0.233473	0.302208	0.468943		0.868462	0.000688217	0.00407466		0.426642	0.0778226	0.152262
Rhamnose	0.00987171	0.952108	0.988331		-0.366649	0.0340609	0.0802579		-0.635171	0.00108727	0.00611592
Serine	0.486287	0.000955584	0.00286675		0.344182	0.0133129	0.0427914		0.0102705	0.939525	0.960878
Spermidine	0.0165485	0.936709	0.988331		0.107526	0.60693	0.708887		-0.100053	0.646514	0.753515
Succinic acid	0.318211	0.0138579	0.0311803		0.07192	0.552597	0.690746		-0.165564	0.197164	0.305944
Sucrose	0.755909	0.00308937	0.00817775		0.994033	0.000239495	0.00215546		0.83812	0.00188919	0.00848016
Threonic acid	0.939068	1.78617e-07	1.33962e-06		-0.0318155	0.804631	0.883132		-0.185323	0.176306	0.283348
Threonine	0.161255	0.132141	0.228705		-0.0150685	0.885243	0.905363		-0.191246	0.0895569	0.163414
Trehalose	-0.125291	0.441488	0.602029		0.388064	0.0236165	0.0677332		-0.0565671	0.737995	0.803059
Uracil	1.62353	7.55723e-07	4.25094e-06		-0.132904	0.58625	0.708887		-0.496322	0.0606632	0.124084
Urea	0.333223	0.0575619	0.107929		-0.601858	0.00148642	0.00668889		-0.303698	0.094417	0.163414
Valine	0.911702	3.37439e-07	2.16925e-06		-0.109319	0.403424	0.533944		-0.326643	0.0231429	0.0612605

## Sheet: Prim. metabolites PCA
	PC1	PC2
(H2O+H2O)-1	1.34756	-2.84733
(H2O+H2O)-4	1.67072	-2.30938
(H2O+H2O)-5	0.959459	-1.63598
(H2O+H2O)-6	0.407545	-1.85748
(H2O+H2O)-7	1.11631	-1.36075
(H2O+PQ)-1	-7.13324	0.129214
(H2O+PQ)-2	-6.31063	0.228575
(H2O+PQ)-3	-4.34844	-0.00096
(H2O+PQ)-5	-4.87061	0.222386
(H2O+PQ)-6	-2.64031	0.433212
(H2O+PQ)-7	-2.46812	0.564741
(SF+H2O)-2	2.11407	0.518591
(SF+H2O)-3	1.72734	0.111551
(SF+H2O)-4	1.30955	0.626472
(SF+H2O)-5	1.97616	0.499967
(SF+H2O)-6	2.25773	0.257034
(SF+H2O)-7	2.22226	0.551787
(SF+PQ)-2	2.20757	1.0141
(SF+PQ)-4	2.00166	1.06655
(SF+PQ)-5	1.68446	1.1125
(SF+PQ)-6	2.32825	1.41458
(SF+PQ)-7	2.4407	1.26062
	PC1	PC2
	0.6414	0.09749
