# Supplementary material for: A Biostimulant Obtained from the Seaweed Ascophyllum nodosum Protects Arabidopsis thaliana from Severe Oxidative Stress
Source: Int J Mol Sci. 2020 Jan 11;21(2):474. doi: 10.3390/ijms21020474 (PMC7013732; doi:10.3390/ijms21020474)
Supplement: Supplementary file 1 [file ijms-21-00474-s001.zip › Data.S6.xlsx]

## Sheet: Lipid norm. data
Lipid name	(H2O+H2O)-1	(H2O+H2O)-3	(H2O+H2O)-4	(H2O+H2O)-5	(H2O+H2O)-6	(H2O+H2O)-7	(H2O+PQ)-1	(H2O+PQ)-2	(H2O+PQ)-4	(H2O+PQ)-5	(H2O+PQ)-6	(H2O+PQ)-7	(SF+H2O)-1	(SF+H2O)-2	(SF+H2O)-3	(SF+H2O)-4	(SF+H2O)-5	(SF+H2O)-6	(SF+H2O)-7	(SF+PQ)-1	(SF+PQ)-2	(SF+PQ)-3	(SF+PQ)-4	(SF+PQ)-5	(SF+PQ)-6	(SF+PQ)-7
DAG 34:2	20.7731	20.7289	20.9449	20.7003	20.7609	20.8148	20.7987	20.7902	20.6045	20.4892	20.0326	19.9944	20.7344	20.4968	20.4751	20.5313	20.5828	20.7032	20.7974	20.7303	20.3248	20.3727	20.3255	20.5791	20.4153	20.2254
DAG 34:3	21.1514	21.1227	21.2825	20.9762	21.1013	21.337	21.3474	21.4341	21.2324	21.1725	20.692	20.6674	20.8807	20.6633	20.6333	20.6964	20.6612	20.9533	21.0314	21.0718	20.6953	20.9033	20.79	21.1405	21.037	20.7657
DAG 36:3 (1)	17.3708	17.6614	18.0491	17.6848	17.7614	17.8169	16.5664	16.8141	16.1218	15.6786	15.5097	15.2292	17.7354	17.2956	17.3669	17.2792	17.2412	17.6458	17.9241	17.1799	16.4509	17.3666	16.295	16.9332	16.643	16.0477
DAG 36:3 (2)	13.4624	14.5498	14.01	14.1653	13.8134	14.6138	15.372	15.6655	14.9713	14.973	13.2975	13.5858	13.8857	13.3614	NA	NA	NA	12.437	14.2199	NA	12.4215	12.1086	12.8401	13.2972	13.5822	NA
DAG 36:5	20.5533	20.3561	20.4455	20.4626	20.5284	20.0761	19.0515	18.8243	19.227	19.3294	19.4429	18.9314	20.2187	20.3697	20.2598	20.0707	20.2242	20.2133	19.8985	20.0196	20.1352	20.1357	20.3108	20.75	20.3023	20.4881
DGDG 32:0	21.9965	22.14	22.284	22.1396	22.1772	22.4757	22.4418	22.478	22.2531	22.1363	21.4607	21.7867	21.7958	21.6173	21.6311	21.5977	21.821	21.9318	22.1761	22.1333	21.6552	21.8977	21.8477	22.1396	21.9958	21.583
DGDG 32:1	18.6288	19.112	19.6876	18.776	18.9016	19.159	19.2899	19.2538	18.8026	18.8142	17.6754	18.1027	18.8531	18.7109	18.5804	18.2707	18.5821	18.7338	18.9804	19.2506	18.4893	18.5139	19.722	19.0756	19.4911	18.7616
DGDG 32:3 (1)	21.8648	22.2248	22.2698	21.971	22.1923	22.4632	22.2967	22.3805	22.2534	22.0107	20.9701	21.595	21.5541	21.7023	21.8946	21.7654	21.7687	22.1805	22.2322	22.5877	22.1223	22.4677	22.4153	22.509	22.8365	21.9772
DGDG 32:3 (2)	20.7277	20.116	20.544	20.5288	20.1877	20.5475	20.1184	20.3156	19.9554	19.9324	19.6868	19.7484	19.7475	19.4537	19.576	19.5978	19.5649	19.9762	20.1523	20.2505	19.8607	19.9623	19.7461	20.5581	20.1913	19.467
DGDG 34:0	22.4959	22.604	22.7752	22.6118	22.6848	22.6931	23.2399	23.2423	23.1082	22.9338	22.2324	22.6598	22.094	22.0048	22.0312	21.9793	22.1756	22.3664	22.6661	22.4088	22.059	22.1558	22.0712	22.4263	22.2224	21.6434
DGDG 34:1	25.3066	25.4769	25.6181	25.4923	25.5609	25.7415	26.3679	26.3153	26.141	26.1194	25.5955	25.8764	25.0854	24.945	24.8528	24.8528	24.9933	25.239	25.558	25.4008	25.0772	25.3031	25.2244	25.3239	25.4583	24.6757
DGDG 34:2	27.2625	27.3992	27.5315	27.4394	27.524	27.6527	27.9088	27.8858	27.7645	27.6527	27.0505	27.3745	26.7129	26.5898	26.433	26.4754	26.6595	27.0914	27.391	27.3745	26.8504	27.0813	26.8974	27.1604	27.1984	26.4346
DGDG 34:3	28.5014	28.3578	28.5315	28.5278	28.4113	28.5389	28.5718	28.5933	28.4394	28.4113	28.1984	28.3109	28.1604	28.17	28.0557	28.0813	28.0914	28.3828	28.509	28.5165	28.2216	28.249	28.4032	28.4551	28.4314	28.1984
DGDG 34:4 (1)	22.2083	21.6787	22.0636	21.8131	21.871	21.8242	20.295	20.229	20.1329	20.3433	20.7506	20.3722	21.1622	21.188	21.2814	21.3862	21.5096	21.5876	21.6555	21.4434	21.3296	20.6725	21.4597	21.6253	21.1932	21.1449
DGDG 34:4 (2)	22.5782	22.8086	22.904	22.687	22.7836	23.1431	23.4923	23.5869	23.0686	23.0215	22.5825	23.0331	21.9876	22.1111	21.9063	22.0515	22.2749	22.4254	22.7438	22.8223	22.6888	23.3101	23.4041	22.9685	23.5869	22.421
DGDG 34:4 (3)	19.3782	19.6678	19.7769	19.579	19.8081	20.163	20.1843	20.1058	19.7929	19.6572	18.6118	19.2994	19.1495	19.1594	19.2872	19.4107	19.4505	19.8349	20.1661	20.1884	19.6968	19.4019	19.4566	20.0864	19.9139	19.163
DGDG 34:5	26.6595	26.1565	26.6595	26.7389	26.5285	26.673	26.509	26.4536	25.9847	25.9694	26.0505	26.2207	26.0813	25.8552	25.7286	25.5492	25.8927	25.7745	26.2408	26.1661	25.8457	26.2408	26.4186	26.2714	26.17	25.9998
DGDG 34:6	28.7771	28.9484	28.9977	28.8682	28.9539	29.1842	28.9316	28.976	28.7613	28.726	28.2077	28.4394	28.4512	28.2935	28.2891	28.3869	28.49	28.7227	29.0111	29.0349	28.6629	28.7129	28.6424	28.995	28.8916	28.341
DGDG 36:1	15.1511	15.7929	16.3549	14.9034	16.6843	15.498	17.0228	16.5344	16.9155	17.0116	15.1206	16.3364	15.875	16.0143	15.6273	15.5829	15.9579	16.1491	16.0655	16.2698	15.9328	15.9337	13.885	16.0876	14.9495	15.3266
DGDG 36:2	21.1162	21.3131	21.498	21.3849	21.3993	21.4329	22.4469	22.4555	22.183	21.967	21.4551	21.8504	21.0236	20.839	20.7346	20.6322	20.8136	21.1047	21.3366	21.5056	21.0244	21.2086	20.8496	21.3579	21.2402	20.9308
DGDG 36:3	24.1946	24.4041	24.3444	24.4041	24.4041	24.5696	24.6649	24.6595	24.5869	24.4425	23.8576	24.2096	24.2463	24.1488	24.1174	24.1332	24.2021	24.5045	24.6486	24.4234	24.0854	24.2463	24.0359	24.4298	24.2891	23.8288
DGDG 36:4	24.8044	24.8142	24.9406	24.7338	24.945	25.1332	25.8312	25.8433	25.7024	25.5983	24.8997	25.2317	24.6209	24.5463	24.5225	24.5754	24.5983	24.824	24.8288	25.1565	24.8288	24.8576	24.824	25.1293	24.9933	24.6486
DGDG 36:5	26.7645	26.9203	26.976	26.8858	27.0084	27.2077	27.8324	27.8504	27.6181	27.4785	26.9869	27.341	26.4441	26.3066	26.3031	26.3494	26.3811	26.7129	26.8974	27.141	26.8504	27.0084	26.7389	27.0711	27.0084	26.604
DGDG 36:6	30.6285	30.7292	30.7047	30.7129	30.7047	30.8385	30.7129	30.7692	30.6458	30.5754	30.3515	30.5014	30.5573	30.5014	30.393	30.5573	30.5933	30.5754	30.7613	30.7613	30.6285	30.6964	30.5481	30.6285	30.6629	30.5109
DGDG 38:4 (1)	NA	12.5872	13.3459	NA	15.1918	14.5368	17.0181	17.3542	17.0787	16.1699	13.4649	15.5326	NA	12.8252	12.3654	NA	13.1223	13.8343	NA	13.4782	13.9243	NA	12.5488	13.064	NA	NA
DGDG 38:4 (2)	15.8667	15.7586	16.8314	16.2502	16.0384	17.1285	16.5187	16.8161	15.8309	16.2555	13.2967	15.0308	15.2969	13.1431	14.7695	14.9747	15.6749	16.2717	16.81	16.9946	15.6345	15.6492	15.8004	16.6932	16.4167	14.5414
DGDG 38:5	21.4206	21.6682	21.7183	21.6511	21.7302	21.986	22.1424	22.1106	21.8182	21.597	21.0848	21.3912	21.0955	20.8363	20.8107	20.7675	20.8736	21.2491	21.5343	21.6863	21.3045	21.4533	21.2214	21.6215	21.3815	21.0301
DGDG 38:6	24.5463	24.7745	24.8764	24.7024	24.8811	25.0691	24.9539	24.9933	24.8288	24.6811	23.7895	24.2821	24.2096	24.239	24.4105	24.4298	24.4105	24.7995	25.0148	25.1871	24.6264	24.6918	24.5045	25.0443	24.9406	24.217
MGDG 32:0	15.6212	16.0007	15.6075	15.6634	15.356	16.519	18.5511	18.6523	18.1898	17.7743	17.2878	17.642	14.1856	14.6664	15.1268	15.1106	15.5797	16.0422	15.7678	15.5814	15.0743	15.5699	15.5272	15.9263	15.6708	15.2077
MGDG 32:1	14.6301	15.0778	16.1419	14.495	14.538	15.9199	17.6969	17.4664	16.7724	16.7881	15.3294	16.4325	NA	NA	13.1767	13.5139	12.5684	14.4057	14.8938	14.4775	13.8848	13.6985	15.0408	14.4425	14.7181	13.0134
MGDG 32:2	16.9731	17.0953	19.0945	17.0588	16.664	17.1155	18.8308	18.7091	18.0959	17.8975	17.3941	17.6657	13.3646	NA	14.0958	NA	13.2994	16.8086	14.875	16.8099	16.041	15.9563	17.0805	16.3374	16.114	15.6485
MGDG 32:3	21.1771	21.6388	21.428	21.1478	21.3045	22.0062	21.3866	21.4637	21.4195	21.3805	20.1694	20.1082	20.8178	20.5461	20.685	20.627	20.6661	21.1869	21.3308	21.6061	21.2391	21.0419	21.0435	21.5399	21.4787	20.6517
MGDG 34:1	25.2643	25.3477	25.5195	25.3239	25.4394	25.632	27.3153	27.3745	27.0084	27.019	26.4645	26.6998	24.9716	24.7645	24.7543	24.7846	24.9316	25.1293	25.433	25.2643	24.8576	25.1135	24.8904	25.1293	25.1135	24.5926
MGDG 34:2	24.6811	24.8576	25.002	24.7846	25.0609	25.0772	26.8974	26.8623	26.7645	26.6998	26.3894	26.5477	24.0609	23.6649	23.7594	23.8288	23.8858	24.317	24.5926	24.9584	24.4488	24.7338	24.3578	24.6431	24.8142	24.0443
MGDG 34:3	26.4999	26.5359	26.6595	26.4661	26.632	26.7389	27.1214	27.141	26.8504	26.7895	26.6998	26.7517	26.2821	26.1135	26.1253	26.1585	26.2535	26.341	26.4614	26.558	26.3153	26.4457	26.3376	26.4938	26.4908	26.2114
MGDG 34:4 (1)	27.2353	27.217	27.4551	27.3066	27.3745	27.5014	28.3787	28.3662	28.0609	27.9977	27.8203	28.003	26.8385	26.632	26.632	26.6865	26.7895	27.0296	27.189	27.391	27.1214	27.2714	27.0401	27.2803	27.2891	26.8974
MGDG 34:4 (2)	15.4308	16.286	15.4243	15.4318	14.5612	15.6798	16.8206	16.3058	17.1075	17.0959	14.3552	14.7801	14.7164	NA	14.1459	16.0371	12.4078	17.0553	15.4506	16.7202	16.0033	16.1283	16.8926	16.4163	18.1639	13.2625
MGDG 34:5	28.6355	28.7895	28.8534	28.7613	28.8355	29.0217	29.3044	29.3494	29.0111	29.0711	28.7162	28.8623	28.2077	28.0711	28.0914	28.1065	28.2077	28.4354	28.6798	28.8682	28.5826	28.6831	28.459	28.7292	28.6527	28.267
MGDG 34:6	31.9224	31.9609	31.9188	31.94	31.9435	32.1931	31.8974	31.9916	31.8571	31.846	31.6242	31.6964	31.7211	31.5435	31.6671	31.6756	31.7613	31.8347	31.995	32.0737	31.8534	31.8829	31.7047	32.0381	31.8608	31.5978
MGDG 36:3 (1)	19.7822	19.7419	19.8565	19.1106	19.7801	19.8833	23.2422	23.2397	22.9355	22.8134	22.3326	22.6066	19.9982	19.8229	19.6359	19.2961	19.5582	19.8742	19.9077	20.3712	20.0415	20.612	19.602	19.8077	20.0058	19.948
MGDG 36:3 (2)	20.2848	20.732	20.8896	20.602	20.7218	21.3466	20.6145	20.8611	20.6136	20.3485	19.5325	20.2226	19.9452	19.7793	19.8431	19.8498	20.1666	20.3347	20.9217	20.202	19.4864	19.482	19.8434	20.122	20.0485	19.379
MGDG 36:4	23.5404	23.2961	23.4923	23.1018	23.2961	23.2679	26.4488	26.5898	26.3477	26.1527	25.8457	26.0567	23.2535	22.7452	23.2821	23.4551	23.092	23.417	23.023	24.5105	24.2096	24.2021	24.1871	24.5165	24.4551	24.2244
MGDG 36:5	27.0401	27.0505	27.189	27.0084	27.0711	27.2891	28.509	28.524	28.2714	28.2399	28.0401	28.1604	26.8019	26.673	26.726	26.7129	26.7517	27.0084	27.0505	27.4785	27.3494	27.2803	27.1984	27.3662	27.4234	27.2077
MGDG 36:6	30.341	30.4134	30.5014	30.3515	30.3196	30.5109	30.4032	30.5014	30.2535	30.2422	30.1361	30.099	30.2422	30.1115	30.1604	30.2077	30.2647	30.2759	30.4919	30.4532	30.196	30.3724	30.3088	30.5296	30.3724	30.2308
MGDG 38:4	19.7998	20.1074	20.305	19.8601	20.2147	20.393	20.0921	20.1372	19.787	19.7822	19.0695	19.2369	19.4246	19.0182	19.0481	19.3818	19.3842	19.7021	20.1515	20.1084	19.712	19.5566	20.0008	19.9785	20.0528	19.206
MGDG 38:6	22.3238	22.4144	22.6296	22.423	22.5572	22.7722	22.157	22.2205	21.8845	21.8291	21.3296	21.5366	21.9567	21.7013	21.8027	21.8056	21.8684	22.1813	22.4406	22.4584	21.9265	22.1457	22.1953	22.3662	22.3657	21.7663
PC 32:0	17.027	16.7732	17.0109	17.2608	16.4229	17.6462	17.8642	17.6866	17.5952	17.4831	16.3442	17.1559	15.9335	14.3704	14.5488	NA	16.8755	15.8453	16.4996	16.5905	15.8432	NA	16.7454	16.2428	15.4939	15.8715
PC 32:1 (1)	20.6506	20.338	20.6508	20.8213	20.3626	20.7916	20.4325	20.044	20.2435	19.9264	19.8845	20.0763	19.9571	19.1476	19.1815	18.0147	20.0639	19.334	19.9524	19.9723	19.0397	17.2796	19.8139	19.7635	19.3404	19.7388
PC 32:1 (2)	22.0862	22.5826	22.679	22.3423	22.4961	22.8092	22.5938	22.7944	22.6196	22.5056	21.2668	22.0127	21.619	22.138	21.9909	22.2457	22.0128	22.5588	22.6882	22.7406	22.2714	22.7278	22.0945	22.6963	22.6557	21.544
PC 32:3	21.3307	20.7621	21.4595	21.3539	21.2772	21.8331	22.1169	21.5262	20.3014	20.1744	20.8883	21.3993	21.154	20.6462	20.0236	18.5752	21.007	18.8856	21.4411	20.9585	19.7654	20.9383	21.3087	21.1493	20.2931	20.9834
PC 34:1	27.1214	27.3494	27.463	27.4314	27.4473	27.5536	27.1015	27.1015	26.8504	26.726	25.9088	26.2625	26.8385	26.7517	26.6458	26.524	26.9869	27.2979	27.4862	27.2625	26.4938	26.7517	26.3811	26.9316	26.8264	26.2571
PC 34:2	29.7276	29.8549	29.9814	29.8814	29.893	30.0349	29.9259	29.8945	29.7692	29.6441	29.2331	29.5203	29.5898	29.5736	29.5808	29.3848	29.6831	29.7309	29.8638	29.8755	29.579	29.668	29.6146	29.8355	29.7373	29.4354
PC 34:3	30.099	30.0864	30.2422	30.1239	30.1604	30.3088	30.4433	30.3828	30.2535	30.1842	29.7096	29.9814	29.708	29.788	29.837	29.6216	29.9539	30.0609	30.1239	30.3088	30.0609	30.0217	29.995	30.2759	30.1724	29.9259
PC 34:4	23.5638	24.1015	24.141	24.0935	24.141	24.5285	24.5812	24.5638	24.2891	24.217	23.1461	23.9933	22.9187	23.0144	23.0132	23.186	23.391	23.6757	24.141	24.3307	23.8764	23.8093	23.7182	24.1174	24.0359	23.2535
PC 34:5	23.654	23.3645	23.7077	23.8093	23.417	23.632	24.417	24.4041	23.976	24.002	23.8385	23.9406	23.0297	22.7838	22.4996	22.5295	23.1699	23.0471	23.0798	23.4551	23.2064	22.9981	23.2229	23.3778	23.1764	22.9694
PC 34:6	24.1719	23.7995	24.0275	23.895	24.002	24.1946	25.1565	25.1214	24.7129	24.6486	24.4488	24.5812	23.7594	23.3511	23.1747	22.9685	23.3645	23.3511	23.6096	23.9316	23.6209	23.7389	23.7389	24.0275	23.8093	23.4676
PC 36:1	23.0014	23.2679	23.4425	23.4041	23.4041	23.4551	23.1452	23.0789	22.9093	22.7009	22.0804	22.5529	22.9013	22.902	22.7852	22.6689	23.0101	23.1291	23.3376	22.9939	22.5878	22.8476	22.4329	22.8202	22.8478	22.2848
PC 36:2	25.9066	26.0793	26.2553	26.1946	26.2151	26.509	26.204	26.2299	25.989	25.8191	25.002	25.4645	25.6918	25.604	25.6153	25.5135	25.7129	25.9203	26.204	25.8881	25.5014	25.6649	25.4551	25.792	25.7129	25.1908
PC 36:3 (1)	26.7771	26.7129	26.9316	26.965	26.8741	26.7895	25.5696	25.5492	25.1214	25.217	25.3811	25.4707	26.673	26.4551	26.3877	26.2077	26.4661	26.5359	26.7517	26.1908	25.9134	26.2225	26.0691	26.1604	25.9847	25.8019
PC 36:3 (2)	23.0011	22.8564	24.7945	24.3307	24.1642	25.0275	26.6595	26.5653	26.0813	25.6568	24.6811	25.3101	22.129	22.3236	22.2505	22.4457	22.2891	21.8269	23.7796	24.019	22.8996	22.7003	23.654	23.7796	23.48	23.5165
PC 36:4	28.7031	28.7292	28.8264	28.8081	28.7096	28.8294	28.4785	28.5682	28.4823	28.3869	27.9088	28.203	28.6251	28.5933	28.6527	28.4274	28.7676	28.7227	28.805	28.7895	28.5165	28.3787	28.5426	28.7357	28.7613	28.5352
PC 36:5	30.3828	30.4032	30.5481	30.4532	30.4532	30.6198	30.611	30.5933	30.3303	30.2979	29.9539	30.1239	30.0609	29.9539	29.9814	29.9814	30.0864	30.1361	30.393	30.4032	30.099	30.1842	30.1842	30.3724	30.3303	30.0609
PC 36:6	29.9814	30.0349	30.0737	30.0479	30.0737	30.2759	30.362	30.4334	30.1604	30.1724	29.5933	29.893	29.5463	29.4174	29.4668	29.459	29.6372	29.7357	29.94	30.1842	29.8916	29.8887	29.8019	30.1604	29.9677	29.6663
PC 38:2 (2)	16.3744	16.5554	17.0589	17.2631	16.621	17.3489	14.9506	13.1152	12.6368	13.3785	14.9804	13.7106	14.4002	13.4149	13.7558	13.7076	15.67	15.8128	17.1625	15.8729	14.6014	13.1272	13.8219	16.0687	15.3816	NA
PC 38:3 (1)	20.6554	20.8694	20.8784	20.9137	20.8854	21.1111	20.2989	20.3056	19.5721	19.901	19.0609	19.6338	20.185	20.1649	20.3729	20.3049	20.2743	20.5758	20.7812	20.5527	19.8052	20.1207	18.7098	20.3441	20.2647	19.5654
PC 38:3 (2)	15.9183	16.8182	16.9165	17.0328	17.2428	17.2977	19.2692	19.2174	19.2781	18.9268	18.1518	18.7435	15.1497	15.9531	16.3341	15.9379	16.5704	16.5195	16.609	17.8121	17.2547	16.6973	17.0819	17.7802	16.5343	16.9565
PC 38:4 (1)	21.3735	21.5484	21.8506	21.7701	21.7059	21.9642	21.1347	21.1794	20.7007	20.5372	19.6257	20.207	21.3337	21.0144	21.233	20.9324	21.3178	21.478	21.7966	21.0066	20.4484	20.8963	20.6144	20.9151	20.8283	20.4208
PC 38:5	23.4676	23.6096	23.7594	23.6971	23.7695	23.976	23.6431	23.5165	23.391	23.2961	22.5073	23.0347	23.1195	23.0197	22.9723	22.928	23.1555	23.3511	23.5638	23.5045	23.1211	23.2128	23.1041	23.4298	23.3645	22.8932
PE 34:1	21.2075	21.5689	21.6708	21.896	21.5805	21.7192	21.5154	21.4457	21.4251	21.3573	20.5123	21.2645	21.0956	21.1898	21.173	20.8877	21.2378	21.2836	21.6415	21.348	21.0283	21.1785	21.2047	21.1665	21.3663	21.0386
PE 34:2	26.6458	26.7129	26.7645	26.9977	26.8504	26.726	26.673	26.6595	26.7645	26.6595	26.1507	26.632	26.5653	26.8142	26.7645	26.3545	26.7517	26.6865	26.7389	26.632	26.4723	26.6595	26.673	26.604	26.632	26.5898
PE 36:2	21.3714	21.7435	21.7933	22.044	21.9305	21.9022	22.1013	22.1111	22.2461	21.9017	21.085	21.7771	21.3673	21.669	21.5585	21.3097	21.6878	21.6642	21.8088	21.649	21.2298	21.6162	21.8591	21.4587	21.9346	21.2802
PE 36:3 (1)	22.1517	22.6524	22.7459	23.0353	22.8723	22.7522	22.0432	21.9432	21.9927	21.9751	20.9583	21.676	21.994	22.154	22.2067	21.7227	22.1461	22.4132	22.8079	22.3809	21.9567	22.3991	21.8478	22.2105	22.3527	21.4962
PE 36:3 (2)	19.9577	20.1691	20.4361	20.4603	20.2779	20.117	21.8238	21.6659	21.8663	21.6098	20.5885	21.4999	19.6398	20.1893	19.9799	19.7244	20.1483	19.965	19.9898	19.9364	19.5755	19.989	19.8968	20.0248	19.9628	19.885
PE 36:4	25.797	25.8694	25.9716	26.2426	25.9998	26.1214	26.1719	26.0995	26.2225	25.9606	25.2463	25.7745	25.6153	25.9066	25.8881	25.5869	25.976	25.9406	26.0711	26.0169	25.7182	25.7745	25.797	25.8647	25.9716	25.7619
PE 36:5	27.0813	27.341	27.3239	27.5315	27.391	27.4551	27.524	27.3239	27.5682	27.391	26.3877	27.0813	26.8623	27.1507	27.3153	26.8741	27.1312	27.2625	27.3494	27.4707	27.1115	27.2535	27.0914	27.2803	27.2625	27.0084
PE 36:6	25.8647	26.1155	26.2426	26.3031	26.2002	26.1833	26.4394	26.4488	26.632	26.3324	25.3844	25.9316	25.5783	26.002	26.0062	25.5609	25.8927	25.9361	25.9271	26.239	25.8788	26.0062	25.8409	26.002	25.9977	25.8118
PE 38:3 (1)	17.3975	17.5159	17.7923	17.9534	17.8985	17.8237	17.2658	16.7037	17.3328	17.0769	15.3289	16.8784	17.0515	17.3973	17.5953	16.8876	17.2648	17.2782	17.9226	17.4353	16.789	17.3716	17.3902	16.8378	17.3989	16.7957
PE 38:3 (2)	17.0567	17.3035	17.6424	18.0677	17.8932	17.8611	18.2527	17.9997	18.2392	17.8362	16.9822	17.4415	16.968	17.1867	17.774	17.0164	17.732	17.6453	17.2756	17.2021	17.0291	17.1345	17.2998	17.0333	17.7467	17.3572
PE 38:4	17.6633	18.0512	18.3546	18.3707	18.1774	18.3867	17.7206	17.613	17.8227	17.7581	16.0058	16.8065	17.1137	17.6966	17.7921	17.2638	17.7123	18.0582	18.5036	17.7238	16.9668	17.3015	17.3198	17.6578	17.7615	16.7472
PE 40:2	19.1034	19.3318	19.6853	19.8373	19.5926	19.5424	19.9348	19.6792	20.1748	19.7138	18.7849	19.6538	19.3379	19.5262	19.5267	19.2377	19.894	19.5129	19.9291	19.3918	19.1365	19.3556	19.3619	19.2613	19.7289	19.2533
TAG 48:0	20.3946	20.0281	20.5345	20.6847	20.8705	20.6449	20.6673	20.2145	20.0412	20.3187	20.3188	20.803	20.7006	20.6556	20.3919	20.1394	20.8253	20.1232	20.4747	20.1487	20.2311	20.6904	21.0844	19.9846	20.1873	20.4758
TAG 48:1	20.1197	20.103	20.2005	20.1195	19.9891	20.0265	19.8209	19.8245	19.7207	19.7006	20.0206	19.9329	20.1027	19.6186	19.7547	19.576	19.7947	19.592	19.9024	20.0158	19.792	19.927	20.3846	19.9688	20.2435	19.8836
TAG 48:2	12.9926	8.55707	12.9623	14.6984	15.1288	9.63528	17.37	18.033	18.1663	18.1537	18.133	18.1979	18.132	17.8849	17.6639	18.0633	17.5105	17.4631	17.3596	15.5661	15.7588	16.1563	17.8164	15.4812	18.4678	17.4991
TAG 50:0	19.9014	19.6733	19.9872	19.8297	20.0575	19.8829	19.9406	19.699	19.6357	19.6844	19.6781	20.1096	19.9823	19.8804	19.7085	19.4597	20.0328	19.5228	19.6761	19.6205	19.5511	19.883	20.0387	19.3683	19.5839	19.9701
TAG 50:1	21.5106	21.1735	21.4009	21.4894	21.7489	21.3559	21.2672	21.2366	21.2125	21.2955	21.4036	21.5239	21.8324	21.5017	21.2805	21.2956	21.4213	21.1856	21.511	21.7272	21.5571	21.6739	22.7541	21.4721	22.1725	21.6488
TAG 50:2	20.8114	20.708	20.7843	20.5662	20.7244	20.8874	21.0761	21.0019	20.8139	20.7904	20.5121	20.7999	21.0674	20.8451	20.7203	20.9291	20.7172	20.8242	21.0131	21.6147	21.2385	21.3993	22.0408	21.3778	22.5774	21.4634
TAG 50:3	19.5139	19.9159	20.0603	19.5689	19.703	19.9421	21.4523	21.3872	21.0689	20.5776	20.346	20.736	21.1406	19.5314	19.572	20.2895	19.6743	20.093	20.2921	20.8283	20.2534	20.1657	21.5482	20.8144	21.5955	20.6438
TAG 50:4	14.0119	13.9221	15.0021	14.032	13.629	14.6084	19.0523	18.7159	17.7851	17.6543	16.8337	17.7024	17.3884	15.0186	15.0409	15.98	14.4393	16.0799	16.4662	18.2515	17.4819	17.6657	19.6754	18.1522	20.6445	17.4627
TAG 52:0	20.5051	20.4163	20.4127	20.4527	20.3264	20.3038	20.2634	20.3319	20.4052	20.3253	20.3547	20.5483	20.5305	20.2821	20.4259	20.4031	20.4878	20.4466	20.3606	20.4184	20.4305	20.2991	20.3177	20.3069	20.2889	20.3861
TAG 52:1	20.6129	20.2902	20.598	20.7099	20.535	20.3073	20.3418	20.3601	20.2476	20.2922	20.5853	20.6981	20.8067	20.4024	20.3278	20.5198	20.4331	20.3156	20.4537	20.4569	20.4335	20.4378	20.9629	20.364	20.7723	20.8518
TAG 52:2	24.0526	23.9847	24.0443	23.9933	24.2317	23.9847	23.9406	23.9495	24.0105	23.9406	24.0105	24.0691	24.0772	23.9672	24.0526	24.0359	24.019	24.0359	24.1174	24.2961	24.1332	24.2317	24.8385	24.2607	24.7846	24.2821
TAG 52:3	22.7491	22.8084	22.8151	22.7886	22.8173	22.795	23.1811	23.164	23.0151	22.9061	22.8463	22.9949	23.0166	22.7929	22.7659	22.8537	22.7387	22.8152	22.9643	23.1379	22.9089	22.9029	23.2821	23.0167	23.6209	23.2074
TAG 52:4	22.8575	22.933	23.0126	22.8034	22.8	23.0415	24.4298	24.2821	23.9225	23.632	23.3778	23.654	23.3645	22.7898	22.8074	23.0638	22.7425	23.0205	23.0692	23.4676	23.1632	23.1818	23.6649	23.48	23.9225	23.5045
TAG 52:5	22.5901	22.5236	22.661	22.3237	22.3638	22.9155	25.3135	25.1527	24.6757	24.2535	23.8576	24.275	22.866	22.3189	22.2431	22.9531	22.2165	22.7429	22.4594	23.4551	23.1095	22.9139	23.2679	23.6757	23.2308	23.2961
TAG 52:6	22.3911	22.333	22.4207	22.1735	22.0105	22.6957	25.1757	24.9977	24.558	24.1174	23.7796	24.2021	22.8689	22.1413	22.0825	22.6989	22.1497	22.5472	22.3448	23.391	23.0874	22.8587	23.2146	23.6757	23.2961	23.0442
TAG 52:7	19.9881	19.9928	20.211	19.9302	19.9634	20.5239	23.2447	23.0225	22.4871	22.0221	21.6947	22.1538	19.7358	19.3347	19.3433	19.7632	19.4549	19.9045	20.1112	20.9673	20.6003	20.437	20.8263	21.0302	21.2957	20.2279
TAG 52:8	21.1788	21.1089	21.4118	21.1479	21.3187	21.7389	24.5345	24.2021	23.5638	23.1434	22.8968	23.4425	20.9446	20.417	20.4459	20.9209	20.6295	21.1822	21.4631	21.7822	21.3218	20.9553	21.4449	21.7229	21.6847	21.0836
TAG 54:0	21.5632	21.4656	21.5288	21.5453	21.4922	21.3492	21.3547	21.2576	21.3647	21.396	21.3842	21.503	21.421	21.4227	21.4641	21.4629	21.5948	21.4457	21.3884	21.4542	21.4739	21.3413	21.6085	21.4185	21.5018	21.4578
TAG 54:1	18.5507	18.7134	18.6129	18.9	18.5387	18.5523	18.0476	18.4988	18.3901	18.4637	18.8876	18.7655	18.7819	18.3086	18.7206	18.5354	18.6582	18.4992	18.5469	18.6828	18.7235	18.4547	19.1892	18.4506	18.8646	18.8289
TAG 54:2	22.2112	22.0187	22.1413	22.1237	22.03	22.104	21.9978	22.0194	22.0169	22.0195	22.1669	22.0842	22.2017	22.0507	22.1601	22.1831	22.1335	22.0947	22.0752	22.0684	22.1603	22.0467	22.0576	22.0139	22.1993	22.2634
TAG 54:3	24.9847	25.0609	25.0854	25.0567	25.141	24.9539	24.9628	24.976	25.0609	24.9803	25.0062	25.0401	25.002	24.9803	24.989	25.0317	24.9134	24.9977	25.002	25.0359	25.0359	24.945	25.3511	25.1527	25.3273	25.1871
TAG 54:4	23.5285	23.6096	23.6431	23.5754	23.5754	23.6096	23.8191	23.7492	23.632	23.5754	23.5404	23.5869	23.5522	23.5045	23.5045	23.5404	23.4551	23.48	23.632	23.7389	23.5404	23.5404	23.5983	23.5983	23.7182	23.6649
TAG 54:5	23.3101	23.48	23.5404	23.3778	23.5754	23.6209	24.317	24.2096	23.7796	23.5638	23.3376	23.5285	23.391	23.1792	23.2049	23.1988	23.1612	23.2679	23.5165	23.5869	23.2535	23.48	23.6757	23.4551	23.7182	23.48
TAG 54:6	23.9584	24.1015	24.2021	23.9847	24.1253	24.5105	25.4105	25.2096	24.7543	24.4551	24.1015	24.4105	23.867	23.6757	23.6757	23.6971	23.6865	23.848	24.0609	24.275	23.8093	24.0105	23.8191	24.1795	24.0935	23.867
TAG 54:7	24.417	24.5165	24.604	24.3511	24.4923	24.8044	26.2679	26.141	25.7103	25.4105	24.9716	25.3679	24.275	24.0854	24.1332	24.1642	24.002	24.3101	24.391	24.7695	24.4425	24.5285	24.3645	24.8717	24.6375	24.275
TAG 54:8	24.6486	24.7338	24.824	24.558	24.7077	25.0062	26.9203	26.7645	26.3477	26.0752	25.604	26.065	24.417	24.2096	24.3307	24.4551	24.2244	24.5404	24.5696	25.2499	24.9933	24.9225	24.848	25.4892	25.0813	24.7234
TAG 54:9	23.632	23.6971	23.7492	23.5754	23.6096	23.976	26.143	26.0422	25.5983	25.3645	24.9134	25.3712	23.5285	23.2174	23.2679	23.4041	23.2194	23.5165	23.7182	24.4362	24.2679	24.1015	24.0443	24.8191	24.317	23.7995
TAG 56:0	17.8252	17.4318	18.0428	18.1804	17.7363	17.9664	17.8954	17.6584	17.6973	17.447	17.7954	18.0326	18.0237	17.8037	17.7363	17.7355	17.915	17.6333	17.5924	17.6032	17.5894	17.8149	18.2372	17.578	17.7618	17.6503
TAG 56:1	15.1417	14.7984	15.7634	15.1338	15.3948	14.9564	NA	14.5835	NA	13.8653	14.562	16.3527	15.2695	15.2737	14.2877	12.4574	14.4549	12.3246	14.3372	NA	14.5939	14.1412	15.0998	13.7083	NA	14.632
TAG 56:2	18.8783	18.7594	18.7759	18.8758	18.8859	18.7738	18.621	18.5904	18.9873	18.6535	18.7553	18.8932	18.8978	18.7651	18.5532	18.7775	18.6979	18.6281	18.6903	18.7464	18.6636	18.6017	19.2835	18.8548	19.2705	18.9566
TAG 56:3	19.0963	19.1559	19.3641	19.2506	18.9625	19.3263	19.7652	19.5048	19.4203	19.1776	19.2839	19.234	19.304	19.0151	19.0172	19.2913	19.2292	19.2925	19.3009	19.5989	19.2857	19.1911	19.3185	19.0854	19.4707	19.9613
TAG 56:4	20.0882	20.2697	20.3066	20.1938	20.4118	20.4192	21.088	20.911	20.6029	20.3922	20.0143	20.1746	19.9491	19.6666	19.5954	19.8444	19.7149	20.0384	20.2296	20.8263	20.222	20.0992	20.4467	20.4922	20.59	21.2197
TAG 56:5	19.7205	19.9085	20.0391	19.924	19.9777	20.3704	21.333	21.0997	20.6217	20.2802	19.8508	20.101	19.6868	19.5361	19.5595	19.5823	19.6055	19.7714	20.0684	20.4405	19.8102	20.0522	19.9234	20.0595	20.0652	21.2628
TAG 56:6	20.1882	20.2483	20.3804	20.1625	20.7601	20.6898	21.5378	21.3797	20.8599	20.522	20.1191	20.3006	19.8854	19.7374	19.6574	19.818	19.7974	19.9109	20.3134	20.7418	19.9839	20.2159	20.604	20.4319	20.3104	20.8439
TAG 56:7	19.8164	19.8863	20.092	19.9157	19.9586	20.386	21.0513	20.9303	20.475	20.2135	19.665	19.932	19.7802	19.4038	19.3908	19.5088	19.4084	19.7637	19.9405	20.3284	19.6666	19.7973	19.8249	20.0905	20.007	19.9315
TAG 56:9	16.8395	16.8698	17.0707	16.952	16.8531	17.5987	19.1983	19.0767	18.5053	18.4726	17.4646	18.1849	16.6772	15.3989	15.6507	16.3311	16.175	16.7119	16.498	17.9001	17.3452	17.2073	17.5543	18.0839	17.3016	16.878
TAG 58:0	14.8472	14.7261	15.3865	14.8348	15.0097	14.5721	15.3904	13.2783	15.1342	14.1934	14.265	15.5253	14.8177	13.6721	13.9713	14.5635	15.805	15.356	14.9221	14.924	15.4304	14.8218	15.4574	14.8604	15.1093	14.2169
TAG 58:1	15.218	13.9501	15.1103	14.5551	16.5278	13.4285	15.4893	12.5279	14.5439	13.4075	13.6883	15.3597	15.7816	15.3474	14.3934	12.1515	14.8295	14.2432	13.9858	14.4246	14.5508	14.7344	16.9062	NA	14.74	13.9386
TAG 58:2	15.7815	15.5097	15.7382	15.2364	15.6612	15.4133	15.6666	15.5803	15.9145	15.1918	15.3576	15.8003	15.1589	15.4856	15.0332	15.7006	15.4074	15.7197	15.5546	15.9787	15.4564	15.5628	16.3842	15.4598	16.7011	15.967
TAG 58:3	16.0948	16.1416	16.5634	16.437	16.7378	16.7938	17.4647	17.1145	17.2683	16.4255	16.3585	16.9883	16.0926	15.9966	15.6439	16.3155	15.4551	16.4286	16.3267	17.3546	16.5346	16.305	17.408	16.7379	16.7655	17.389
TAG 58:4	17.3238	17.2926	17.8131	17.6964	17.321	18.2272	19.0478	18.6041	18.1963	18.0284	17.2668	17.8048	17.3299	17.1331	16.4414	17.255	17.0458	17.4795	17.431	18.5175	17.795	17.78	17.7312	17.681	17.9687	18.4673
TAG 58:5	17.7364	17.5834	18.2332	17.8708	17.9882	18.4019	19.7099	19.3582	19.0408	18.6227	18.1406	18.5665	17.5974	17.1956	16.9934	17.3254	17.035	17.8191	18.0954	18.7786	18.131	17.5457	18.2798	18.3293	18.445	18.6043
TAG 58:6	17.7752	18.0512	18.1791	17.9185	18.0518	18.8662	20.1181	19.6254	19.0837	18.8824	18.1213	18.5942	17.4438	17.3967	16.9935	17.353	17.7803	17.4867	18.3803	18.9914	18.2067	18.3795	18.3475	18.481	18.3023	18.0084
TAG 58:7	15.828	16.1075	16.401	15.938	16.3151	16.9483	17.8857	17.8288	17.2217	16.9959	15.8894	16.1518	15.3808	14.1136	14.4558	15.6958	14.3612	15.7648	16.2399	17.3183	16.3474	16.1733	16.7918	17.2859	16.7185	16.5024
TAG 60:2	15.1779	14.9182	15.4711	15.1072	15.7132	15.3079	15.3038	15.3904	15.371	13.8046	14.5038	14.1682	15.1298	15.6672	15.3324	15.3667	14.2222	15.3016	13.8286	15.5414	14.558	15.3406	16.5778	15.4785	15.4635	15.0597
TAG 60:4	14.5694	15.146	15.475	NA	13.3522	15.3363	17.3522	17.1577	16.9609	16.3661	16.0862	16.167	15.6444	14.8563	14.8719	15.852	14.4331	15.9166	13.7062	15.6667	14.903	15.423	16.4604	15.3003	16.1689	16.4286
TAG 60:5	14.665	15.5588	16.281	14.9591	15.6357	16.3201	18.6841	17.991	17.9516	17.3211	16.878	17.3191	16.7237	16.6543	16.6581	16.922	16.1232	16.7279	15.5411	16.1841	15.8265	16.4513	16.5711	16.6527	16.2947	17.1372
TAG 60:6	17.2117	17.0929	17.587	16.9641	17.2643	17.6301	19.4474	19.4415	19.2818	18.6785	18.1649	18.3615	18.0318	17.8862	17.7753	18.4146	17.8706	18.2148	17.4477	18.1022	17.7857	17.7249	18.412	18.7835	18.211	18.4706
TAG 60:7	17.0173	16.963	17.4038	16.6461	16.2734	17.7868	19.6721	19.5763	19.2757	18.8429	18.4277	18.5964	17.4971	17.6634	17.5464	18.1023	17.4481	17.9069	17.2764	18.1092	18.1636	18.1103	18.4143	18.9714	18.0289	18.4413
SQDG 32:3 (1)	16.8241	17.7282	17.5169	17.2048	17.7033	18.1157	17.9027	18.0891	17.1733	17.0818	15.1993	16.7335	16.9497	17.4074	17.9578	17.2761	17.0659	17.6127	17.4152	18.4878	17.7987	18.4998	17.9351	18.4146	18.7411	17.4556
SQDG 32:3 (2)	19.1022	19.1324	19.2576	19.4389	19.1915	19.7177	19.6794	19.4535	19.6914	19.5479	18.701	19.3114	18.3633	18.2868	17.9055	18.3218	18.5057	18.8836	19.6201	19.2293	19.2223	18.8257	19.1961	18.9787	18.8838	18.6503
SQDG 32:2	14.4361	15.7414	14.7789	15.1874	15.2082	16.222	17.5397	17.4502	17.2711	15.459	12.9219	14.7382	NA	NA	11.179	15.1628	12.6544	14.2615	16.1342	16.3135	15.2115	15.3763	13.8373	14.3318	14.7436	NA
SQDG 34:5	19.6025	19.6826	19.7448	19.9315	19.8081	20.0253	20.1877	20.0369	19.8923	19.7189	18.9484	19.5229	19.0301	18.937	18.8101	18.8466	18.9617	19.3548	19.8088	19.8239	19.6271	19.5949	19.603	19.6279	19.6849	19.1801
SQDG 34:4 (1)	16.1956	16.8321	17.1523	17.1742	17.0845	17.4977	16.7395	16.6742	17.0248	16.1814	15.2049	15.6111	16.4853	16.9804	16.2091	16.032	16.4883	16.7664	17.144	16.6557	16.3543	16.808	17.2647	17.1946	17.0501	16.8823
SQDG 34:4 (2)	20.7516	20.7717	20.9074	20.9183	20.8573	21.1903	21.1863	20.996	20.7626	20.6582	20.0075	20.4249	20.4335	20.2887	20.174	20.1165	20.2182	20.5187	20.9284	21.0629	20.7139	20.7274	20.8301	20.8324	20.9923	20.4962
SQDG 34:4 (3)	15.0884	15.5526	15.6744	15.6191	15.5555	16.2518	16.4385	16.2464	16.2104	15.8832	NA	14.6036	NA	14.8228	14.7523	14.6171	15.2836	15.5966	16.3454	16.4927	16.2265	15.5932	15.98	16.302	16.7253	13.9479
SQDG 36:6	27.6998	27.7895	27.8203	27.8203	27.8019	28.0243	27.7453	27.6389	27.6458	27.5389	26.9088	27.2353	27.3153	27.3066	27.2445	27.2077	27.3153	27.5754	27.8504	27.8019	27.7325	27.7064	27.5463	27.6663	27.6251	27.3662
SQDG 36:5	24.8336	24.7389	24.895	24.8191	24.8576	25.002	25.654	25.5105	25.4457	25.2571	24.8528	25.1565	24.4984	24.5285	24.4234	24.2961	24.3578	24.5869	24.7389	24.895	24.8044	24.8997	24.7234	24.7594	24.7077	24.7745
PI 36:5	20.4666	20.9775	21.2946	21.3135	21.306	21.2882	21.7095	21.5192	21.7602	21.3441	20.1826	21.2912	21.0277	21.4307	21.4018	21.0147	20.9969	21.2916	21.3798	21.0749	20.9278	21.3494	20.7755	20.763	21.0502	20.6333
PG 34:4	NA	19.7185	18.4431	16.9912	18.8985	19.2483	20.0209	20.1201	20.4155	20.1791	NA	17.826	17.3777	19.3206	19.5572	19.8333	19.2649	20.2117	20.1315	20.5517	20.4631	20.011	18.5394	20.1513	20.4447	18.5453
PG 34:0	20.6061	20.5365	20.9515	21.3001	20.8378	20.2258	21.4867	21.3889	21.8201	21.5027	20.7341	21.3532	20.977	20.8675	20.5745	20.6906	20.6219	20.8657	20.6977	20.8018	20.5748	20.6938	20.6586	20.3228	20.9886	20.3114
PS 38:2	27.8974	27.9316	27.9146	27.9484	27.9869	28.1065	28.0453	28.0505	27.9203	27.9595	27.5682	27.7325	27.7195	27.8799	27.8385	27.5682	27.8799	27.9428	27.9031	28.0453	27.9814	27.9146	27.7833	27.9705	27.9146	27.8623
PS 38:1	27.5682	27.6389	27.7064	27.7129	27.6595	27.8264	27.7453	27.6527	27.604	27.5609	27.1984	27.3239	27.5826	27.5315	27.5536	27.4314	27.5754	27.5898	27.6181	27.7064	27.5014	27.5536	27.509	27.604	27.6181	27.4785
PS 38:0	25.3844	25.4707	25.5638	25.5667	25.4138	25.632	25.4953	25.2856	24.9672	24.9361	24.5165	24.7441	25.1908	25.0935	25.0359	24.8764	25.1604	25.3578	25.5696	25.2244	25.002	25.0443	24.7945	25.0813	25.0854	24.8288
PI 34:3	NA	15.4753	15.7493	NA	14.7131	NA	15.242	NA	15.3072	14.092	NA	NA	14.0175	15.0512	15.4737	15.7299	NA	NA	NA	NA	15.2737	15.4707	NA	14.5304	14.6721	NA
PS 40:5	27.604	27.7064	27.726	27.6527	27.7389	27.8445	27.965	27.9088	27.8564	27.8445	27.3578	27.5898	27.2979	27.3992	27.3066	27.2625	27.3662	27.4938	27.5898	27.8385	27.7581	27.6181	27.5389	27.7453	27.6798	27.5536
PS 40:4	28.0505	27.965	28.1556	28.1842	28.1164	28.2445	28.1652	28.0453	27.9814	27.9484	27.6595	27.8385	27.8264	27.7895	27.7517	27.6931	27.7708	27.8385	28.0609	28.1015	27.8799	27.8623	27.9088	27.9869	27.9259	27.8081
PS 40:3	26.3992	26.3861	26.5522	26.3811	26.4661	26.4831	26.189	25.8288	25.9495	25.8528	25.8904	25.7286	26.2607	26.2679	26.3975	26.2607	26.4073	26.4394	26.604	26.2926	26.2517	26.2077	26.3256	26.2821	26.217	26.2463
PS 40:2 (1)	24.945	24.4488	24.9134	25.2426	24.9977	25.0148	23.9847	23.5638	23.0568	23.027	23.654	23.6431	25.1135	24.6703	24.6703	24.417	24.4676	24.7024	24.9043	24.3778	24.1871	24.5105	24.0609	23.9672	23.9043	23.8385
PS 40:2 (2)	22.0897	21.4412	22.5028	22.4736	22.5834	23.0923	24.9977	24.7745	24.2679	24.0526	23.1803	23.7995	20.8746	19.0837	18.9322	18.7106	19.6618	19.9004	22.0285	22.8628	20.6808	21.1753	21.9076	21.9846	22.1506	21.566
PS 40:1	24.3239	24.5522	24.6096	24.5812	24.5869	24.6865	24.7129	24.6209	24.3307	24.1642	23.5522	23.9043	24.1174	24.1253	24.019	23.9847	24.1174	24.4362	24.5225	24.3844	23.9406	24.0854	23.8385	24.1253	24.1174	23.7695
PS 42:4	21.955	22.1074	22.1581	22.1388	22.1795	22.3668	22.1414	21.9847	21.7561	21.7665	21.0212	21.3841	21.5524	21.5321	21.3754	21.3396	21.5436	21.806	22.0654	22.0993	21.6145	21.5763	21.3959	21.7504	21.7432	21.4229
PS 42:3 (1)	19.4413	19.6953	19.9255	19.6834	19.7451	19.7205	18.6158	18.4808	18.3458	18.2606	17.4582	17.8	19.4154	19.2358	19.2195	18.7371	19.3387	19.6044	19.9179	19.014	18.5751	18.9513	18.7325	18.8626	18.8574	18.437
PS 42:2 (2)	14.0776	13.9899	14.5341	NA	14.8215	14.1759	17.6846	17.398	17.3082	17.004	15.9062	17.1306	13.1779	13.8172	NA	NA	14.0398	14.8969	14.8105	15.614	15.2895	14.2594	13.9844	15.7593	14.0356	14.0512
PS 42:2 (1)	19.2963	19.2487	19.271	19.3758	19.5178	19.3598	18.6855	18.4934	17.9226	18.0705	16.858	17.6483	18.2841	18.6346	18.3567	18.2003	18.4518	19.0516	19.253	18.7281	18.0159	18.3398	18.0492	18.2774	18.3131	18.0789
Full name	Abbr.
Diacylglycerol	DAG
Triacylglycerol	TAG
Monogalactosyldiacylglycerol	MGDG
Digalactosyldiacylglycerol	DGDG
Phosphatidylcholine	PC
Phosphatidylethanolamine	PE
Phosphatidylglycerol	PG
Phosphoinositol	PI
Phosphoserine	PS
Sulfoquinovosyldiacylglycerol	SQDG

## Sheet: Lipidome heatmap
Lipid name	(H2O+PQ)-(H2O+H2O) (Log2 fold change)	(SF+H2O)-(H2O+H2O) (Log2 fold change)	(SF+PQ)-(H2O+H2O) (Log2 fold change)
TAG 50:4	3.75636	1.57241	4.27534
TAG 48:2	5.67993	5.39626	4.34889			Full name	Abbr.
TAG 60:7	2.0501	0.6193	1.30478			Diacylglycerol	DAG
TAG 60:5	2.12086	0.908665	0.87541			Triacylglycerol	TAG
MGDG 36:4	2.9078	-0.15131	0.996886			Monogalactosyldiacylglycerol	MGDG
MGDG 36:3 (1)	3.16925	0.0351873	0.363052			Digalactosyldiacylglycerol	DGDG
TAG 52:6	2.13433	0.0673354	0.886554			Phosphatidylcholine	PC
TAG 60:4	1.90592	0.264318	0.988632			Phosphatidylethanolamine	PE
TAG 60:6	1.60425	0.657038	0.921165			Phosphatidylglycerol	PG
TAG 52:5	2.02503	-0.0201395	0.715481			Phosphoinositol	PI
PS 42:2 (2)	2.75214	-0.171309	0.393548			Phosphoserine	PS
TAG 52:7	2.33591	-0.437613	0.667691			Sulfoquinovosyldiacylglycerol	SQDG
TAG 54:9	1.86555	-0.29628	0.548496
TAG 52:8	2.31301	-0.459911	0.110409
MGDG 32:0	2.22157	-0.583342	-0.286413
PC 38:3 (2)	2.06008	-0.717684	0.288521
DGDG 38:4 (1)	2.18762	-0.878627	-0.661617
MGDG 34:2	1.78295	-0.894925	-0.33907
PC 36:3 (2)	1.79659	-1.59419	-0.593507
PS 40:2 (2)	1.81487	-2.4793	-0.602766
MGDG 32:1	1.61386	-1.42206	-0.951533
MGDG 32:2	0.765325	-2.84483	-1.04958
MGDG 34:1	1.55911	-0.454168	-0.426691
TAG 56:9	1.45311	-0.824507	0.436599
TAG 54:8	1.54973	-0.353969	0.297592
MGDG 36:5	1.18277	-0.290242	0.22109
PE 36:3 (2)	1.27267	-0.288293	-0.340594
TAG 54:7	1.11398	-0.336482	0.0247341
TAG 50:3	1.14398	0.300678	1.05157
TAG 58:7	0.739248	-1.11175	0.477646
TAG 58:6	0.930519	-0.592572	0.247801
TAG 52:4	0.975054	0.0716862	0.575511
TAG 58:5	0.937475	-0.531675	0.332986
MGDG 34:4 (1)	0.756118	-0.520184	-0.16395
PC 34:6	0.763167	-0.646652	-0.252973
DGDG 36:2	0.702243	-0.431095	-0.197816
DGDG 36:4	0.622567	-0.250023	0.0245282
TAG 54:6	0.576512	-0.359804	-0.139384
PG 34:0	0.637977	0.0134613	-0.121288
TAG 56:5	0.557691	-0.302894	0.240512
DGDG 36:5	0.557449	-0.475465	-0.0429538
SQDG 36:5	0.455075	-0.367686	-0.0628347
TAG 56:6	0.381642	-0.53059	0.0425265
DGDG 34:1	0.53653	-0.457519	-0.323659
DGDG 34:4 (2)	0.313405	-0.603048	0.211387
PC 34:5	0.498906	-0.720373	-0.396556
DAG 36:3 (2)	0.541713	-0.626459	-1.25255
PC 32:0	0.331364	-1.34467	-0.892279
DGDG 34:0	0.258616	-0.455927	-0.503139
DGDG 34:2	0.137927	-0.703483	-0.468635
MGDG 34:5	0.236281	-0.559057	-0.210165
MGDG 34:3	0.303595	-0.340838	-0.18122
SQDG 32:3 (2)	0.0906835	-0.751494	-0.308692
TAG 56:4	0.248943	-0.418935	0.275026
PC 34:4	0.0368706	-0.760597	-0.217535
TAG 52:3	0.222342	0.0540194	0.358222
DGDG 38:5	-0.00503634	-0.671897	-0.310243
TAG 50:2	0.0854215	0.126805	0.926165
PS 40:5	0.0416515	-0.324072	-0.0360245
TAG 52:2	-0.0617554	-0.00492738	0.35529
PC 36:6	0.0211895	-0.480882	-0.143974
SQDG 34:5	-0.0812805	-0.69212	-0.207435
TAG 50:1	-0.12332	-0.0139559	0.411405
PC 34:3	-0.010948	-0.299645	-0.0614654
DGDG 34:3	-0.0572618	-0.270898	-0.124518
DAG 34:3	-0.0708625	-0.373326	-0.247067
MGDG 34:6	-0.160999	-0.237165	-0.121002
DGDG 32:0	-0.109393	-0.406356	-0.308981
PC 36:5	-0.158317	-0.391974	-0.243245
PS 40:4	-0.17966	-0.300669	-0.194589
SQDG 34:4 (2)	-0.226834	-0.516862	-0.091546
TAG 48:1	-0.256391	-0.33006	-0.0623186
PC 34:2	-0.231027	-0.265988	-0.217637
DGDG 34:6	-0.281268	-0.434268	-0.200549
PC 36:4	-0.429679	-0.111371	-0.159135
SQDG 36:6	-0.373833	-0.423866	-0.191093
PS 40:3	-0.538103	-0.0678369	-0.184196
DAG 34:2	-0.335573	-0.169878	-0.362421
PE 34:1	-0.353778	-0.391582	-0.417012
MGDG 32:3	-0.462402	-0.613293	-0.221702
PS 40:1	-0.34251	-0.367758	-0.519406
MGDG 38:4	-0.429187	-0.668979	-0.311177
SQDG 34:4 (1)	-0.750064	-0.402905	-0.102313
DGDG 34:5	-0.371362	-0.6947	-0.410411
PS 38:0	-0.514453	-0.321753	-0.496596
PC 36:2	-0.408576	-0.441636	-0.592542
DGDG 32:3 (2)	-0.482444	-0.717893	-0.436824
PS 42:4	-0.475279	-0.548883	-0.493428
PC 38:5	-0.48175	-0.554648	-0.480347
PC 32:3	-0.268329	-1.08854	-0.565151
MGDG 38:6	-0.693818	-0.554827	-0.345157
PC 36:1	-0.584564	-0.367164	-0.641308
MGDG 36:3 (2)	-0.397351	-0.642754	-0.968045
PC 34:1	-0.735888	-0.461352	-0.693741
DAG 36:5	-1.26927	-0.22442	-0.0977024
PC 32:1 (1)	-0.501288	-1.22376	-1.32419
PE 38:3 (1)	-0.9658	-0.387753	-0.584729
PE 36:3 (1)	-0.936918	-0.495263	-0.609664
PE 38:4	-0.879537	-0.432997	-0.81329
PC 38:3 (1)	-1.09016	-0.505689	-0.976633
PC 38:4 (1)	-1.138	-0.401271	-0.969268
PS 42:2 (1)	-1.39852	-0.740309	-1.08741
PC 36:3 (1)	-1.45685	-0.344936	-0.792719
PS 40:2 (1)	-1.43882	-0.220574	-0.806181
PS 42:3 (1)	-1.54163	-0.349173	-0.92614
PC 38:2 (2)	-3.07494	-2.02405	-2.05803
DAG 36:3 (1)	-1.73744	-0.225766	-1.02175
DGDG 34:4 (1)	-1.55596	-0.514032	-0.642874

## Sheet: lipidome and statistics
Lipid name	(H2O+PQ)-(H2O+H2O) (Log2 fold change)	(H2O+PQ)-(H2O+H2O) (P.value)	(H2O+PQ)-(H2O+H2O) (adjusted p.value)		(SF+H2O)-(H2O+H2O) (Log2 fold change)	(SF+H2O)-(H2O+H2O) (p.value)	(SF+H2O)-(H2O+H2O) (adjusted p.value)		(SF+PQ)-(H2O+H2O) (Log2 fold change)	(SF+PQ)-(H2O+H2O) (p.value)	(SF+PQ)-(H2O+H2O) (adjusted p.value)
DAG 34:2	-0.335573	0.0115311	0.0262841		-0.169878	0.163829	0.244168		-0.362421	0.0052998	0.0211508
DAG 34:3	-0.0708625	0.571072	0.627775		-0.373326	0.00440962	0.0150866		-0.247067	0.0484823	0.11386
DAG 36:3 (1)	-1.73744	1.49441e-07	1.05288e-06		-0.225766	0.335577	0.424269		-1.02175	0.000166489	0.00184327
DAG 36:3 (2)	0.541713	0.188521	0.273092		-0.626459	0.174455	0.252715		-1.25255	0.00720092	0.0265748
DAG 36:5	-1.26927	2.08077e-10	2.93199e-09		-0.22442	0.0685212	0.118009		-0.0977024	0.414657	0.526818
DGDG 32:0	-0.109393	0.468873	0.550571		-0.406356	0.00906612	0.0265141		-0.308981	0.0411424	0.105549
DGDG 32:1	-0.387736	0.135767	0.206312		-0.371122	0.138295	0.208841		-0.00074637	0.997566	0.997566
DGDG 32:3 (1)	-0.246594	0.214822	0.30831		-0.2932	0.128987	0.199931		0.252222	0.188849	0.298689
DGDG 32:3 (2)	-0.482444	0.00587245	0.0142223		-0.717893	9.54385e-05	0.0014793		-0.436824	0.00903751	0.0318367
DGDG 34:0	0.258616	0.10882	0.173887		-0.455927	0.00552576	0.0171299		-0.503139	0.00256937	0.0135304
DGDG 34:1	0.53653	0.000920075	0.00269078		-0.457519	0.0027112	0.0109954		-0.323659	0.0265228	0.0761302
DGDG 34:2	0.137927	0.423607	0.528928		-0.703483	0.000236994	0.00327752		-0.468635	0.00838678	0.0302314
DGDG 34:3	-0.0572618	0.518828	0.591311		-0.270898	0.00368104	0.0133205		-0.124518	0.152445	0.265334
DGDG 34:4 (1)	-1.55596	3.07624e-11	7.94695e-10		-0.514032	0.00064514	0.00555537		-0.642874	5.28741e-05	0.000745045
DGDG 34:4 (2)	0.313405	0.108143	0.173887		-0.603048	0.00276658	0.0109954		0.211387	0.254301	0.379006
DGDG 34:4 (3)	-0.120255	0.608695	0.659774		-0.234783	0.303688	0.389022		-0.0278285	0.901902	0.907758
DGDG 34:5	-0.371362	0.00738268	0.0173381		-0.6947	7.32712e-06	0.000282241		-0.410411	0.00261879	0.0135304
DGDG 34:6	-0.281268	0.0562481	0.101377		-0.434268	0.00369537	0.0133205		-0.200549	0.150801	0.265334
DGDG 36:1	0.759444	0.0482123	0.0911329		0.16522	0.642755	0.706575		-0.247215	0.488858	0.587387
DGDG 36:2	0.702243	9.72761e-05	0.000393846		-0.431095	0.00667557	0.0198983		-0.197816	0.185958	0.29867
DGDG 36:3	0.0167033	0.900235	0.912002		-0.100963	0.434526	0.526184		-0.195549	0.13673	0.2523
DGDG 36:4	0.622567	7.58179e-05	0.000324754		-0.250023	0.0590062	0.106348		0.0245282	0.8475	0.873322
DGDG 36:5	0.557449	0.000372031	0.00125358		-0.475465	0.00123416	0.00716369		-0.0429538	0.743981	0.789843
DGDG 36:6	-0.127042	0.09651	0.159139		-0.157034	0.0361736	0.0720504		-0.0859482	0.236462	0.35584
DGDG 38:4 (1)	2.18762	0.00438961	0.0110182		-0.878627	0.242789	0.330108		-0.661617	0.37471	0.496411
DGDG 38:4 (2)	-0.687523	0.228823	0.325391		-1.03506	0.0655448	0.114151		-0.350876	0.519364	0.614514
DGDG 38:5	-0.00503634	0.975782	0.975782		-0.671897	0.000277349	0.00330685		-0.310243	0.0614966	0.138144
DGDG 38:6	-0.22017	0.255427	0.359919		-0.306348	0.105423	0.171965		-0.0637954	0.729172	0.784873
MGDG 32:0	2.22157	2.17769e-08	1.87523e-07		-0.583342	0.0362576	0.0720504		-0.286413	0.287093	0.412032
MGDG 32:1	1.61386	0.00123824	0.00342726		-1.42206	0.00509569	0.0164548		-0.951533	0.0337462	0.0925015
MGDG 32:2	0.765325	0.126559	0.196167		-2.84483	1.13107e-05	0.000292194		-1.04958	0.0340167	0.0925015
MGDG 32:3	-0.462402	0.0629281	0.110839		-0.613293	0.0129433	0.0334369		-0.221702	0.341692	0.469347
MGDG 34:1	1.55911	9.93069e-11	1.72415e-09		-0.454168	0.0033031	0.0127995		-0.426691	0.0053218	0.0211508
MGDG 34:2	1.78295	2.01155e-11	6.23579e-10		-0.894925	2.74973e-06	0.000213104		-0.33907	0.0303519	0.0855373
MGDG 34:3	0.303595	0.00206587	0.0054273		-0.340838	0.000494696	0.00479236		-0.18122	0.0429005	0.105549
MGDG 34:4 (1)	0.756118	4.72976e-07	2.52798e-06		-0.520184	5.90483e-05	0.00108328		-0.16395	0.139146	0.253737
MGDG 34:4 (2)	0.608539	0.401737	0.514622		-0.500139	0.489648	0.583811		0.757716	0.281025	0.411406
MGDG 34:5	0.236281	0.0608532	0.108417		-0.559057	6.29e-05	0.00108328		-0.210165	0.0819638	0.171681
MGDG 34:6	-0.160999	0.0834211	0.141034		-0.237165	0.0108328	0.0299836		-0.121002	0.171757	0.286262
MGDG 36:3 (1)	3.16925	1.5236e-15	1.18079e-13		0.0351873	0.837239	0.865147		0.363052	0.0424058	0.105549
MGDG 36:3 (2)	-0.397351	0.0837102	0.141034		-0.642754	0.00576733	0.0175282		-0.968045	0.000124411	0.00148336
MGDG 36:4	2.9078	5.29846e-18	8.21262e-16		-0.15131	0.224811	0.30837		0.996886	1.862e-08	9.62031e-07
MGDG 36:5	1.18277	1.46075e-12	5.66042e-11		-0.290242	0.00256704	0.0107538		0.22109	0.0170886	0.056356
MGDG 36:6	-0.133713	0.106995	0.173887		-0.155688	0.0542763	0.0989744		-0.0544015	0.486449	0.587387
MGDG 38:4	-0.429187	0.0437617	0.084012		-0.668979	0.00211018	0.0100124		-0.311177	0.122416	0.239949
MGDG 38:6	-0.693818	0.000114625	0.00043334		-0.554827	0.000837261	0.00648877		-0.345157	0.026035	0.0761302
PC 32:0	0.331364	0.372847	0.485642		-1.34467	0.00126147	0.00716369		-0.892279	0.0226612	0.0675479
PC 32:1 (1)	-0.501288	0.165264	0.246308		-1.22376	0.00133675	0.00716369		-1.32419	0.000632371	0.00494369
PC 32:1 (2)	-0.20043	0.406823	0.516865		-0.320167	0.174363	0.252715		-0.109192	0.637452	0.715979
PC 32:3	-0.268329	0.532215	0.594244		-1.08854	0.0134008	0.033502		-0.565151	0.178652	0.294585
PC 34:1	-0.735888	0.0010853	0.00305858		-0.461352	0.0237731	0.0526404		-0.693741	0.00132747	0.00823032
PC 34:2	-0.231027	0.038376	0.07626		-0.265988	0.0150578	0.037047		-0.217637	0.0425351	0.105549
PC 34:3	-0.010948	0.921648	0.927633		-0.299645	0.0093624	0.0266751		-0.0614654	0.567895	0.652028
PC 34:4	0.0368706	0.874862	0.896954		-0.760597	0.00229429	0.0101604		-0.217535	0.339445	0.469347
PC 34:5	0.498906	0.000819468	0.00244265		-0.720373	6.51653e-06	0.000282241		-0.396556	0.00429481	0.0190199
PC 34:6	0.763167	6.90307e-06	3.34367e-05		-0.646652	3.92496e-05	0.000869097		-0.252973	0.0614889	0.138144
PC 36:1	-0.584564	0.000967716	0.0027777		-0.367164	0.0220445	0.0502486		-0.641308	0.000258966	0.00236116
PC 36:2	-0.408576	0.0254107	0.0547036		-0.441636	0.0132751	0.033502		-0.592542	0.00147644	0.00880185
PC 36:3 (1)	-1.45685	1.03989e-13	5.37275e-12		-0.344936	0.00121139	0.00716369		-0.792719	1.16633e-08	9.03909e-07
PC 36:3 (2)	1.79659	9.90967e-05	0.000393846		-1.59419	0.000253744	0.00327752		-0.593507	0.123915	0.239949
PC 36:4	-0.429679	0.000187534	0.00066063		-0.111371	0.248107	0.334405		-0.159135	0.103659	0.211409
PC 36:5	-0.158317	0.133974	0.205604		-0.391974	0.00054088	0.00493156		-0.243245	0.0208265	0.0649463
PC 36:6	0.0211895	0.8643	0.89311		-0.480882	0.000436988	0.00451554		-0.143974	0.234983	0.35584
PC 38:2 (2)	-3.07494	2.70083e-05	0.000119608		-2.02405	0.00165451	0.00854829		-2.05803	0.00197296	0.0109218
PC 38:3 (1)	-1.09016	0.000103334	0.000400419		-0.505689	0.0352478	0.0720504		-0.976633	0.00023754	0.00230116
PC 38:3 (2)	2.06008	8.89938e-08	6.89702e-07		-0.717684	0.0120178	0.0315722		0.288521	0.285756	0.412032
PC 38:4 (1)	-1.138	7.53506e-06	3.5392e-05		-0.401271	0.0489635	0.0936955		-0.969268	3.97406e-05	0.00061598
PC 38:5	-0.48175	0.00440728	0.0110182		-0.554648	0.000972726	0.00702822		-0.480347	0.00338263	0.0158881
PE 34:1	-0.353778	0.0217091	0.047393		-0.391582	0.00946536	0.0266751		-0.417012	0.00614693	0.0238194
PE 34:2	-0.19301	0.0499138	0.0932125		-0.114942	0.214271	0.296535		-0.173937	0.0653961	0.144806
PE 36:2	0.0729161	0.658055	0.693867		-0.216726	0.179525	0.255287		-0.222105	0.169362	0.285337
PE 36:3 (1)	-0.936918	7.7522e-05	0.000324754		-0.495263	0.0155239	0.037597		-0.609664	0.00376888	0.0171817
PE 36:3 (2)	1.27267	2.60938e-08	2.12871e-07		-0.288293	0.0703161	0.119769		-0.340594	0.0347577	0.092887
PE 36:4	-0.0877544	0.503124	0.581972		-0.145375	0.253957	0.336439		-0.156758	0.219656	0.340558
PE 36:5	-0.141273	0.350472	0.468303		-0.218884	0.138778	0.208841		-0.142775	0.327904	0.462046
PE 36:6	0.0432101	0.777437	0.808743		-0.30824	0.0448104	0.0868202		-0.183531	0.219715	0.340558
PE 38:3 (1)	-0.9658	0.000657385	0.00207948		-0.387753	0.116513	0.182419		-0.584729	0.0216561	0.0658176
PE 38:3 (2)	0.154494	0.468127	0.550571		-0.266297	0.19966	0.278804		-0.37988	0.0720565	0.155388
PE 38:4	-0.879537	0.00364713	0.00942176		-0.432997	0.11308	0.178852		-0.81329	0.0049948	0.0209241
PE 40:2	0.141429	0.424438	0.528928		0.0509056	0.764119	0.80026		-0.15987	0.349969	0.471697
TAG 48:0	-0.132307	0.462991	0.550571		-0.0532614	0.758055	0.799309		-0.125906	0.468523	0.57647
TAG 48:1	-0.256391	0.0169072	0.0379799		-0.33006	0.00218372	0.0100124		-0.0623186	0.523653	0.614896
TAG 48:2	5.67993	2.073e-07	1.28526e-06		5.39626	2.62496e-07	4.06869e-05		4.34889	7.30742e-06	0.000188775
TAG 50:0	-0.0974532	0.429968	0.528928		-0.136873	0.253415	0.336439		-0.17214	0.154065	0.265334
TAG 50:1	-0.12332	0.452942	0.544233		-0.0139559	0.929355	0.938969		0.411405	0.0142514	0.0490883
TAG 50:2	0.0854215	0.597594	0.652304		0.126805	0.417968	0.510118		0.926165	3.12891e-06	0.000121245
TAG 50:3	1.14398	0.00026544	0.000914294		0.300678	0.256175	0.336501		1.05157	0.00043773	0.00376934
TAG 50:4	3.75636	1.77e-07	1.14312e-06		1.57241	0.0044773	0.0150866		4.27534	9.41333e-09	9.03909e-07
TAG 52:0	-0.0313997	0.615285	0.662286		0.0166753	0.78142	0.812886		-0.0531812	0.379691	0.498746
TAG 52:1	-0.088026	0.45253	0.544233		-0.0432907	0.700189	0.748478		0.102435	0.365604	0.488523
TAG 52:2	-0.0617554	0.532902	0.594244		-0.00492738	0.958654	0.958654		0.35529	0.000912272	0.00614792
TAG 52:3	0.222342	0.0299223	0.0626752		0.0540194	0.566216	0.648279		0.358222	0.000746179	0.00525717
TAG 52:4	0.975054	1.48505e-06	7.67276e-06		0.0716862	0.633896	0.701814		0.575511	0.000717408	0.00525717
TAG 52:5	2.02503	3.2273e-10	4.16859e-09		-0.0201395	0.917326	0.935431		0.715481	0.00103607	0.00669129
TAG 52:6	2.13433	1.00112e-10	1.72415e-09		0.0673354	0.727298	0.772131		0.886554	0.000100244	0.00129482
TAG 52:7	2.33591	1.47097e-10	2.28001e-09		-0.437613	0.0507828	0.0948354		0.667691	0.0044508	0.0191632
TAG 52:8	2.31301	4.6286e-10	5.51872e-09		-0.459911	0.0503826	0.0948354		0.110409	0.625527	0.707713
TAG 54:0	-0.114035	0.0710111	0.122631		-0.0336625	0.568288	0.648279		-0.0255834	0.664099	0.735252
TAG 54:1	-0.135775	0.304742	0.42554		-0.0659901	0.601722	0.675847		0.0973775	0.442719	0.557898
TAG 54:2	-0.0540447	0.370506	0.485642		0.0235993	0.682887	0.740192		0.010852	0.850784	0.873322
TAG 54:3	-0.0427199	0.524131	0.592995		-0.0590912	0.362667	0.446138		0.10076	0.126608	0.239949
TAG 54:4	0.0602199	0.328189	0.446222		-0.0661982	0.266094	0.346593		0.0382052	0.517376	0.614514
TAG 54:5	0.30524	0.0279299	0.0593032		-0.209888	0.10804	0.172641		0.0372536	0.769608	0.811492
TAG 54:6	0.576512	0.00167457	0.00455366		-0.359804	0.0310822	0.0654767		-0.139384	0.383928	0.500074
TAG 54:7	1.11398	3.48676e-07	2.07865e-06		-0.336482	0.0399821	0.0784459		0.0247341	0.874555	0.891816
TAG 54:8	1.54973	1.46896e-09	1.62635e-08		-0.353969	0.0353425	0.0720504		0.297592	0.0730446	0.155388
TAG 54:9	1.86555	8.88767e-11	1.72415e-09		-0.29628	0.0865503	0.144251		0.548496	0.0029341	0.0146705
TAG 56:0	-0.109473	0.394208	0.509186		-0.0866934	0.482733	0.580029		-0.115993	0.349603	0.471697
TAG 56:1	-0.357206	0.513737	0.589846		-1.14024	0.0229159	0.0514777		-0.763041	0.14558	0.259367
TAG 56:2	-0.074725	0.487323	0.567932		-0.109142	0.29556	0.381765		0.086185	0.406802	0.521109
TAG 56:3	0.205025	0.110424	0.17465		0.0145385	0.90396	0.927906		0.223328	0.0731828	0.155388
TAG 56:4	0.248943	0.169616	0.248023		-0.418935	0.0208294	0.0481875		0.275026	0.117537	0.233566
TAG 56:5	0.557691	0.0213053	0.0471761		-0.302894	0.177874	0.255282		0.240512	0.281348	0.411406
TAG 56:6	0.381642	0.0712049	0.122631		-0.53059	0.0118211	0.0315722		0.0425265	0.829101	0.862488
TAG 56:7	0.368664	0.0554417	0.1011		-0.40972	0.0290324	0.0630103		-0.0597061	0.738139	0.789045
TAG 56:9	1.45311	1.22064e-05	5.5647e-05		-0.824507	0.00360508	0.0133205		0.436599	0.100689	0.208091
TAG 58:0	-0.264983	0.451138	0.544233		-0.166379	0.622249	0.693875		0.07827	0.816363	0.854974
TAG 58:1	-0.628864	0.317865	0.436009		-0.40795	0.498762	0.590139		0.0841352	0.892546	0.904214
TAG 58:2	0.0284851	0.879594	0.896954		-0.119555	0.5112	0.599416		0.373291	0.0480732	0.11386
TAG 58:3	0.475253	0.043903	0.084012		-0.424391	0.0603749	0.107564		0.466401	0.0404555	0.105549
TAG 58:4	0.54568	0.0334133	0.0690542		-0.452971	0.0637446	0.112277		0.379166	0.11683	0.233566
TAG 58:5	0.937475	0.000694981	0.00211287		-0.531675	0.0312599	0.0654767		0.332986	0.164926	0.280918
TAG 58:6	0.930519	0.00179691	0.00480208		-0.592572	0.0292693	0.0630103		0.247801	0.342169	0.469347
TAG 58:7	0.739248	0.0539513	0.099553		-1.11175	0.00418523	0.0147434		0.477646	0.18691	0.29867
TAG 60:2	-0.525634	0.124655	0.195168		-0.30423	0.348816	0.432532		0.148783	0.644509	0.718697
TAG 60:4	1.90592	0.000118042	0.00043563		0.264318	0.514338	0.599416		0.988632	0.0209504	0.0649463
TAG 60:5	2.12086	3.75294e-07	2.15446e-06		0.908665	0.00527829	0.0166966		0.87541	0.00689684	0.0260734
TAG 60:6	1.60425	1.63148e-07	1.09947e-06		0.657038	0.00508417	0.0164548		0.921165	0.00023051	0.00230116
TAG 60:7	2.0501	6.60896e-09	6.03386e-08		0.6193	0.0118213	0.0315722		1.30478	6.31793e-06	0.000188775
SQDG 32:3 (1)	-0.485534	0.167859	0.247792		-0.13195	0.691972	0.744831		0.674917	0.0512469	0.118556
SQDG 32:3 (2)	0.0906835	0.670966	0.702701		-0.751494	0.00111183	0.00716369		-0.308692	0.141665	0.255327
SQDG 32:2	0.634373	0.426719	0.528928		-1.38396	0.106507	0.171965		-0.293335	0.711589	0.771303
SQDG 34:5	-0.0812805	0.647829	0.690922		-0.69212	0.000416068	0.00451554		-0.207435	0.232359	0.35584
SQDG 34:4 (1)	-0.750064	0.00989616	0.0228941		-0.402905	0.131645	0.20203		-0.102313	0.695403	0.759067
SQDG 34:4 (2)	-0.226834	0.164982	0.246308		-0.516862	0.00242003	0.0104196		-0.091546	0.554306	0.641175
SQDG 34:4 (3)	0.252778	0.547378	0.606026		-0.387331	0.336678	0.424269		0.271739	0.482093	0.587387
SQDG 36:6	-0.373833	0.00647209	0.0154334		-0.423866	0.00179717	0.00898583		-0.191093	0.126941	0.239949
SQDG 36:5	0.455075	0.000159864	0.000576253		-0.367686	0.000997554	0.00702822		-0.0628347	0.528569	0.616001
PI 36:5	0.193384	0.348948	0.468303		0.112708	0.568813	0.648279		-0.168575	0.396049	0.511563
PG 34:4	1.05239	0.0877036	0.146173		0.725358	0.197061	0.277676		1.15529	0.0455824	0.110395
PG 34:0	0.637977	0.000695203	0.00211287		0.0134613	0.932911	0.938969		-0.121288	0.45083	0.563538
PS 38:2	-0.0848326	0.314952	0.435871		-0.145358	0.0804061	0.135467		-0.0396348	0.623299	0.707713
PS 38:1	-0.171184	0.0406122	0.0796822		-0.13075	0.0991914	0.16356		-0.118105	0.134407	0.251002
PS 38:0	-0.514453	0.000648904	0.00207948		-0.321753	0.0179421	0.0427849		-0.496596	0.000637896	0.00494369
PI 34:3	-0.432129	0.371348	0.485642		-0.24444	0.584801	0.661637		-0.325796	0.468614	0.57647
PS 40:5	0.0416515	0.650804	0.690922		-0.324072	0.00110533	0.00716369		-0.0360245	0.684418	0.752375
PS 40:4	-0.17966	0.0362185	0.0729073		-0.300669	0.000756959	0.00617519		-0.194589	0.019916	0.0643122
PS 40:3	-0.538103	1.2826e-07	9.46682e-07		-0.0678369	0.345649	0.432062		-0.184196	0.0152326	0.0513272
PS 40:2 (1)	-1.43882	4.30094e-09	4.44431e-08		-0.220574	0.170156	0.251183		-0.806181	2.64783e-05	0.000513017
PS 40:2 (2)	1.81487	0.000599973	0.00197863		-2.4793	9.10456e-06	0.000282241		-0.602766	0.186665	0.29867
PS 40:1	-0.34251	0.0341628	0.0696742		-0.367758	0.0195188	0.0458395		-0.519406	0.00168076	0.00964878
PS 42:4	-0.475279	0.00582803	0.0142223		-0.548883	0.0013403	0.00716369		-0.493428	0.00331255	0.0158881
PS 42:3 (1)	-1.54163	6.61778e-09	6.03386e-08		-0.349173	0.0522809	0.0964707		-0.92614	1.41855e-05	0.000314108
PS 42:2 (2)	2.75214	4.00439e-07	2.21671e-06		-0.171309	0.672204	0.733744		0.393548	0.298992	0.425173
PS 42:2 (1)	-1.39852	1.83809e-06	9.19045e-06		-0.740309	0.00219627	0.0100124		-1.08741	3.74529e-05	0.00061598

## Sheet: Lipidome PCA
	PC1	PC2
(H2O+H2O)-1	-4.24732	-3.9706
(H2O+H2O)-3	-3.97478	-7.3248
(H2O+H2O)-4	-1.23609	-6.11753
(H2O+H2O)-5	-2.91279	-4.91856
(H2O+H2O)-6	-2.78511	-4.48097
(H2O+H2O)-7	-0.112199	-9.07523
(H2O+PQ)-1	13.4397	-1.48558
(H2O+PQ)-2	12.9396	-0.249617
(H2O+PQ)-4	10.6602	1.13166
(H2O+PQ)-5	8.51606	1.61464
(H2O+PQ)-6	2.81866	5.57411
(H2O+PQ)-7	6.75561	3.28601
(SF+H2O)-1	-4.87154	3.13045
(SF+H2O)-2	-6.54541	3.30479
(SF+H2O)-3	-8.02044	4.18288
(SF+H2O)-4	-4.73891	4.48702
(SF+H2O)-5	-7.37471	2.00705
(SF+H2O)-6	-3.60536	1.01144
(SF+H2O)-7	-2.0756	-2.28223
(SF+PQ)-1	1.78801	-1.82009
(SF+PQ)-2	-1.95217	1.74096
(SF+PQ)-3	-1.69777	1.75863
(SF+PQ)-4	-0.282683	2.96634
(SF+PQ)-5	0.609975	-0.454306
(SF+PQ)-6	1.02004	2.21051
(SF+PQ)-7	-2.11694	3.77465
	PC1	PC2
variance	0.48319	0.215099
