# Supplementary material for: A Biostimulant Obtained from the Seaweed Ascophyllum nodosum Protects Arabidopsis thaliana from Severe Oxidative Stress
Source: Int J Mol Sci. 2020 Jan 11;21(2):474. doi: 10.3390/ijms21020474 (PMC7013732; doi:10.3390/ijms21020474)
Supplement: Supplementary file 1 [file ijms-21-00474-s001.zip › Data.S7.xlsx]

## Sheet: Transcriptome PC1 (analysis)
Number of families	1
Number of comparisons per family	6
Alpha	0.05
Tukey's multiple comparisons test	Mean Diff.	95% CI of diff.	Significant?	Summary	Adjusted P Value
H2O +H2O vs. H2O+PQ	-35.55	-51.21 to -19.89	Yes	***	0.0004
H2O +H2O vs. SF+H2O	5.948	-9.712 to 21.61	No	ns	0.6345
H2O +H2O vs. SF+PQ	4.058	-11.60 to 19.72	No	ns	0.839
H2O+PQ vs. SF+H2O	41.49	25.83 to 57.15	Yes	***	0.0001
H2O+PQ vs. SF+PQ	39.6	23.94 to 55.27	Yes	***	0.0002
SF+H2O vs. SF+PQ	-1.889	-17.55 to 13.77	No	ns	0.9791
Test details	Mean 1	Mean 2	Mean Diff.	SE of diff.	n1	n2	q	DF
H2O +H2O vs. H2O+PQ	-6.385	29.16	-35.55	4.89	3	3	10.28	8
H2O +H2O vs. SF+H2O	-6.385	-12.33	5.948	4.89	3	3	1.72	8
H2O +H2O vs. SF+PQ	-6.385	-10.44	4.058	4.89	3	3	1.174	8
H2O+PQ vs. SF+H2O	29.16	-12.33	41.49	4.89	3	3	12	8
H2O+PQ vs. SF+PQ	29.16	-10.44	39.6	4.89	3	3	11.45	8
SF+H2O vs. SF+PQ	-12.33	-10.44	-1.889	4.89	3	3	0.5464	8

## Sheet: Metabolome PC1 (analysis)
Number of families	1
Number of comparisons per family	6
Alpha	0.05
Tukey's multiple comparisons test	Mean Diff.	95% CI of diff.	Significant?	Summary	Adjusted P Value
H2O +H2O vs. H2O+PQ	5.729	3.936 to 7.522	Yes	****	< 0.0001
H2O +H2O vs. SF+H2O	-0.8342	-2.627 to 0.9589	No	ns	0.5657
H2O +H2O vs. SF+PQ	-1.032	-2.905 to 0.8406	No	ns	0.426
H2O+PQ vs. SF+H2O	-6.563	-8.273 to -4.853	Yes	****	< 0.0001
H2O+PQ vs. SF+PQ	-6.761	-8.554 to -4.968	Yes	****	< 0.0001
SF+H2O vs. SF+PQ	-0.198	-1.991 to 1.595	No	ns	0.9891
Test details	Mean 1	Mean 2	Mean Diff.	SE of diff.	n1	n2	q	DF
H2O +H2O vs. H2O+PQ	1.1	-4.629	5.729	0.6344	5	6	12.77	18
H2O +H2O vs. SF+H2O	1.1	1.935	-0.8342	0.6344	5	6	1.86	18
H2O +H2O vs. SF+PQ	1.1	2.133	-1.032	0.6626	5	5	2.203	18
H2O+PQ vs. SF+H2O	-4.629	1.935	-6.563	0.6049	6	6	15.34	18
H2O+PQ vs. SF+PQ	-4.629	2.133	-6.761	0.6344	6	5	15.07	18
SF+H2O vs. SF+PQ	1.935	2.133	-0.198	0.6344	6	5	0.4414	18

## Sheet: Lipidome PC1 (analysis)
Number of families	1
Number of comparisons per family	6
Alpha	0.05
Tukey's multiple comparisons test	Mean Diff.	95% CI of diff.	Significant?	Summary	Adjusted P Value
H2O +H2O vs. H2O+PQ	-11.73	-15.72 to -7.748	Yes	****	< 0.0001
H2O +H2O vs. SF+H2O	2.774	-1.066 to 6.614	No	ns	0.2161
H2O +H2O vs. SF+PQ	-2.169	-6.009 to 1.671	No	ns	0.4163
H2O+PQ vs. SF+H2O	14.51	10.67 to 18.35	Yes	****	< 0.0001
H2O+PQ vs. SF+PQ	9.564	5.724 to 13.40	Yes	****	< 0.0001
SF+H2O vs. SF+PQ	-4.943	-8.632 to -1.254	Yes	**	0.0061
Test details	Mean 1	Mean 2	Mean Diff.	SE of diff.	n1	n2	q	DF
H2O +H2O vs. H2O+PQ	-2.545	9.188	-11.73	1.435	6	6	11.56	22
H2O +H2O vs. SF+H2O	-2.545	-5.319	2.774	1.383	6	7	2.837	22
H2O +H2O vs. SF+PQ	-2.545	-0.3759	-2.169	1.383	6	7	2.218	22
H2O+PQ vs. SF+H2O	9.188	-5.319	14.51	1.383	6	7	14.84	22
H2O+PQ vs. SF+PQ	9.188	-0.3759	9.564	1.383	6	7	9.781	22
SF+H2O vs. SF+PQ	-5.319	-0.3759	-4.943	1.329	7	7	5.261	22

## Sheet: Transcriptome PC2 (analysis)
Number of families	1
Number of comparisons per family	6
Alpha	0.05
Tukey's multiple comparisons test	Mean Diff.	95% CI of diff.	Significant?	Summary	Adjusted P Value
H2O +H2O vs. H2O+PQ	-12.85	-33.08 to 7.382	No	ns	0.2526
H2O +H2O vs. SF+H2O	-9.832	-30.06 to 10.40	No	ns	0.4515
H2O +H2O vs. SF+PQ	-19.58	-39.81 to 0.6575	No	ns	0.0579
H2O+PQ vs. SF+H2O	3.019	-17.21 to 23.25	No	ns	0.9619
H2O+PQ vs. SF+PQ	-6.724	-26.96 to 13.51	No	ns	0.7191
SF+H2O vs. SF+PQ	-9.743	-29.98 to 10.49	No	ns	0.4586
Test details	Mean 1	Mean 2	Mean Diff.	SE of diff.	n1	n2	q	DF
H2O +H2O vs. H2O+PQ	-10.56	2.287	-12.85	6.318	3	3	2.877	8
H2O +H2O vs. SF+H2O	-10.56	-0.7326	-9.832	6.318	3	3	2.201	8
H2O +H2O vs. SF+PQ	-10.56	9.011	-19.58	6.318	3	3	4.382	8
H2O+PQ vs. SF+H2O	2.287	-0.7326	3.019	6.318	3	3	0.6758	8
H2O+PQ vs. SF+PQ	2.287	9.011	-6.724	6.318	3	3	1.505	8
SF+H2O vs. SF+PQ	-0.7326	9.011	-9.743	6.318	3	3	2.181	8

## Sheet: Metabolome PC2 (analysis)
Number of families	1
Number of comparisons per family	6
Alpha	0.05
Tukey's multiple comparisons test	Mean Diff.	95% CI of diff.	Significant?	Summary	Adjusted P Value
H2O +H2O vs. H2O+PQ	-2.265	-2.820 to -1.711	Yes	****	< 0.0001
H2O +H2O vs. SF+H2O	-2.43	-2.984 to -1.875	Yes	****	< 0.0001
H2O +H2O vs. SF+PQ	-3.176	-3.755 to -2.597	Yes	****	< 0.0001
H2O+PQ vs. SF+H2O	-0.1647	-0.6934 to 0.3639	No	ns	0.8148
H2O+PQ vs. SF+PQ	-0.9108	-1.465 to -0.3564	Yes	**	0.0011
SF+H2O vs. SF+PQ	-0.7461	-1.301 to -0.1916	Yes	**	0.0065
Test details	Mean 1	Mean 2	Mean Diff.	SE of diff.	n1	n2	q	DF
H2O +H2O vs. H2O+PQ	-2.002	0.2629	-2.265	0.1962	5	6	16.33	18
H2O +H2O vs. SF+H2O	-2.002	0.4276	-2.43	0.1962	5	6	17.52	18
H2O +H2O vs. SF+PQ	-2.002	1.174	-3.176	0.2049	5	5	21.92	18
H2O+PQ vs. SF+H2O	0.2629	0.4276	-0.1647	0.187	6	6	1.245	18
H2O+PQ vs. SF+PQ	0.2629	1.174	-0.9108	0.1962	6	5	6.566	18
SF+H2O vs. SF+PQ	0.4276	1.174	-0.7461	0.1962	6	5	5.379	18

## Sheet: Lipidome PC2 (analysis)
Number of families	1
Number of comparisons per family	6
Alpha	0.05
Tukey's multiple comparisons test	Mean Diff.	95% CI of diff.	Significant?	Summary	Adjusted P Value
H2O +H2O vs. H2O+PQ	-7.626	-11.15 to -4.105	Yes	****	< 0.0001
H2O +H2O vs. SF+H2O	-8.244	-11.64 to -4.851	Yes	****	< 0.0001
H2O +H2O vs. SF+PQ	-7.435	-10.83 to -4.042	Yes	****	< 0.0001
H2O+PQ vs. SF+H2O	-0.6179	-4.011 to 2.776	No	ns	0.9569
H2O+PQ vs. SF+PQ	0.1914	-3.202 to 3.585	No	ns	0.9986
SF+H2O vs. SF+PQ	0.8092	-2.451 to 4.070	No	ns	0.9001
Test details	Mean 1	Mean 2	Mean Diff.	SE of diff.	n1	n2	q	DF
H2O +H2O vs. H2O+PQ	-5.981	1.645	-7.626	1.268	6	6	8.505	22
H2O +H2O vs. SF+H2O	-5.981	2.263	-8.244	1.222	6	7	9.541	22
H2O +H2O vs. SF+PQ	-5.981	1.454	-7.435	1.222	6	7	8.604	22
H2O+PQ vs. SF+H2O	1.645	2.263	-0.6179	1.222	6	7	0.715	22
H2O+PQ vs. SF+PQ	1.645	1.454	0.1914	1.222	6	7	0.2215	22
SF+H2O vs. SF+PQ	2.263	1.454	0.8092	1.174	7	7	0.9747	22

## Sheet: Raw Data (PC1)
PC1 values
Transcriptome
H2O +H2O	H2O+PQ	SF+H2O	SF+PQ
-10.078	37.7232	-13.7944	-9.37142
-6.69475	31.0248	-15.7393	-15.0161
-2.3824	18.7362	-7.4647	-6.94302
Metabolome
H2O +H2O	H2O+PQ	SF+H2O	SF+PQ
1.34756	-7.13324	2.11407	2.20757
1.67072	-6.31063	1.72734	2.00166
0.959459	-4.34844	1.30955	1.68446
0.407545	-4.87061	1.97616	2.32825
1.11631	-2.64031	2.25773	2.4407
	-2.46812	2.22226
Lipidome
H2O +H2O	H2O+PQ	SF+H2O	SF+PQ
-4.24732	13.4397	-4.87154	1.78801
-3.97478	12.9396	-6.54541	-1.95217
-1.23609	10.6601	-8.02044	-1.69777
-2.91279	8.51606	-4.73891	-0.28268
-2.78511	2.81866	-7.37471	0.609975
-0.1122	6.75561	-3.60536	1.02004
		-2.0756	-2.11694

## Sheet: Raw Data (PC2)
PC2 values
Transcriptome
H2O +H2O	H2O+PQ	SF+H2O	SF+PQ
-8.46066	-1.93013	0.234031	1.91733
-10.993	9.47152	2.46343	24.5868
-12.2397	-0.68186	-4.89528	0.527467
Metabolome
H2O +H2O	H2O+PQ	SF+H2O	SF+PQ
-2.84733	0.129214	0.518591	1.0141
-2.30938	0.228575	0.111551	1.06655
-1.63598	-0.00096	0.626472	1.1125
-1.85748	0.222386	0.499967	1.41458
-1.36075	0.433212	0.257034	1.26062
	0.564741	0.551787
Lipidome
H2O +H2O	H2O+PQ	SF+H2O	SF+PQ
-3.9706	-1.48558	3.13045	-1.82009
-7.3248	-0.24962	3.30479	1.74096
-6.11753	1.13166	4.18288	1.75863
-4.91856	1.61464	4.48702	2.96634
-4.48097	5.57411	2.00705	-0.45431
-9.07523	3.28601	1.01144	2.21051
		-2.28223	3.77465
