# Supplementary material for: A Biostimulant Obtained from the Seaweed Ascophyllum nodosum Protects Arabidopsis thaliana from Severe Oxidative Stress
Source: Int J Mol Sci. 2020 Jan 11;21(2):474. doi: 10.3390/ijms21020474 (PMC7013732; doi:10.3390/ijms21020474)
Supplement: Supplementary file 1 [file ijms-21-00474-s001.zip › Table.S1.xlsx]

## Sheet: Sheet1
Table S1. Number of differentially expressed genes for each pairwise comparison. SF: SuperFifty, PQ: paraquat.
Treatment A	Treatment B	Log2 fold change >= 1; FDR < 0.001
		Total no. of genes modulated	No. of genes up-regulated	No. of genes down-regulated
SF+PQ	SF+H2O	6	5	1
SF+PQ	H2O+H2O	317	83	234
SF+H2O	H2O+H2O	163	35	128
H2O+PQ	H2O+H2O	1429	1237	192
H2O+PQ	SF+PQ	1729	1346	383
H2O+PQ	SF+H2O	1802	1417	385
