# Supplementary material for: A Biostimulant Obtained from the Seaweed Ascophyllum nodosum Protects Arabidopsis thaliana from Severe Oxidative Stress
Source: Int J Mol Sci. 2020 Jan 11;21(2):474. doi: 10.3390/ijms21020474 (PMC7013732; doi:10.3390/ijms21020474)
Supplement: Supplementary file 1 [file ijms-21-00474-s001.zip › Table.S2.xlsx]

## Sheet: Sheet1
Table S2. List of 35 DEGs significantly upregulated upon SF-priming vs. untreated control.
		Average TMM values				Annotation
Gene ID	SF+H2O vs H2O+H2O (log2 fold change)	H2O+H2O	H2O+PQ	SF+H2O	SF+PQ	Gene name	Description
AT3G02790	9.19	0	10.56	6.44	11.26		zinc finger (C2H2 type) family protein
AT3G14340	4.22	0.59	6.22	13.66	12.21		hypothetical protein
AT4G15248	2.73	0.75	1.79	5.23	8.34	BBX30	B-box type zinc finger family protein
AT1G08250	1.97	1.21	3.69	4.74	4.45	ADT6	arogenate dehydratase 6
AT2G19650	1.65	1.11	1.13	3.45	2.52		Cysteine/Histidine-rich C1 domain family protein
AT3G44450	1.61	14.28	19.76	43.64	60.65		hypothetical protein
AT5G45820	1.57	8.62	5.88	25.72	28.07	CIPK20	CBL-interacting protein kinase 20
AT5G66740	1.55	0.42	0.49	1.3	1.37		spindle assembly abnormal protein (DUF620)
AT1G53700	1.52	0.63	0.98	1.82	1.84	WAG1	WAG 1
AT2G15020	1.52	0.94	1.11	2.69	3.13		hypothetical protein
AT5G02190	1.42	2.73	2.35	7.33	8.4	PCS1	Eukaryotic aspartyl protease family protein
AT5G11590	1.41	1.91	1.61	5.04	5.56	TINY2	Integrase-type DNA-binding superfamily protein
AT2G44940	1.36	7.88	6.32	20.17	28.83		Integrase-type DNA-binding superfamily protein
AT3G45210	1.35	4.52	4.74	11.55	15.35		transcription initiation factor TFIID subunit (Protein of unknown function, DUF584)
AT3G44990	1.35	29.15	26.58	73.92	99.89	XTH31	xyloglucan endo-transglycosylase-related 8
AT2G31230	1.28	8.34	23.54	20.14	27.6	ERF15	ethylene-responsive element binding factor 15
AT4G15550	1.23	4.88	24.43	11.46	12.07	IAGLU	indole-3-acetate beta-D-glucosyltransferase
AT1G04570	1.21	1.3	1.33	3.05	2.71		Major facilitator superfamily protein
AT3G58070	1.19	2.2	1.65	5.01	4.63	GIS	C2H2 and C2HC zinc fingers superfamily protein
AT4G03050	1.15	2.25	2.49	5.02	4.55	AOP3	2-oxoglutarate-dependent dioxygenase
AT1G67330	1.14	3.53	5.14	7.73	6.46		glucuronoxylan 4-O-methyltransferase-like protein (DUF579)
AT5G67390	1.11	6.43	4.82	13.94	15.86		glycosyltransferase-like protein
AT2G21210	1.07	25.55	15.99	53.74	65.71		SAUR-like auxin-responsive protein family
AT2G01290	1.07	13.39	18.8	28.15	33.23	RPI2	ribose-5-phosphate isomerase 2
AT2G20750	1.06	7.22	3.03	14.97	15.91	EXPB1	expansin B1
AT5G61570	1.06	3.57	3.35	7.61	6.15		Protein kinase superfamily protein
AT2G46790	1.05	4.08	6.26	8.34	9.24	PRR9	pseudo-response regulator 9
AT5G02760	1.04	11.95	3.34	24.69	16.34		Protein phosphatase 2C family protein
AT5G28910	1.03	1.12	1.1	2.31	2.44		alpha-(1,6)-fucosyltransferase
AT1G70230	1.02	8.11	9.73	16.53	15.36	TBL27	TRICHOME BIREFRINGENCE-LIKE 27
AT4G38860	1.02	27.84	11.74	56.72	52.8		SAUR-like auxin-responsive protein family
AT4G12320	1.02	32.62	28.68	66.06	74.88	CYP706A6	cytochrome P450, family 706, subfamily A, polypeptide 6
AT3G04140	1.02	3.01	2.67	6.07	5.53		Ankyrin repeat family protein
AT5G20150	1.01	10.46	11.29	21.08	17.94	SPX1	SPX domain-containing protein 1
AT2G39710	1.01	4.72	6.33	9.44	12.41		Eukaryotic aspartyl protease family protein
